# Supplementary material for: Ungulates rely less on visual cues, but more on adapting movement behaviour, when searching for forage
Source: PeerJ. 2017 May 16;5:e3178. doi: 10.7717/peerj.3178 (PMC5436584; doi:10.7717/peerj.3178)
Supplement: Supplemental Information 1 [file peerj-05-3178-s001.xlsx]

## Sheet: FinalMatrix
Patch	50.142
Patch	222.813
Patch	269.967
Patch	310.586
Patch	382.554
Patch	470.069
Patch	494.892
Patch	508.993
Patch	542.043
Patch	545.962
Patch	555.83
Patch	579.961
Patch	610.386
Patch	620.968
Patch	666.934
Patch	681.962
Patch	681.969
Patch	700.09
Patch	700.417
Patch	725.083
Patch	745.006
Patch	776.581
Patch	778.325
Patch	814.923
Patch	817.123
Patch	871.051
Patch	877.476
Patch	908.047
Patch	940.582
Patch	947.479
Patch	956.159
Patch	958.028
Patch	968.871
Patch	984.183
Patch	993.359
Patch	1009.66
Patch	1012.09
Patch	1032.91
Patch	1070.2
Patch	1150.8
Patch	1161.23
Patch	1174.75
Patch	1175.06
Patch	1181.41
Patch	1206.1
Patch	1207.34
Patch	1213.92
Patch	1214.24
Patch	1214.77
Patch	1238.43
Patch	1241.94
Patch	1253.31
Patch	1263.93
Patch	1268.22
Patch	1280.84
Patch	1281.72
Patch	1360.74
Patch	1363.28
Patch	1386.38
Patch	1431.53
Patch	1442.79
Patch	1460.71
Patch	1462.01
Patch	1472.69
Patch	1478.78
Patch	1490.41
Patch	1491.78
Patch	1498.55
Patch	1516.63
Patch	1534.79
Patch	1546.19
Patch	1557.29
Patch	1557.39
Patch	1562.2
Patch	1571.18
Patch	1575
Patch	1595.23
Patch	1650.4
Patch	1652.45
Patch	1658.77
Patch	1664.23
Patch	1664.76
Patch	1673.95
Patch	1680.25
Patch	1681.98
Patch	1684.48
Patch	1684.68
Patch	1704.62
Patch	1714.74
Patch	1720.3
Patch	1720.57
Patch	1735.01
Patch	1738.93
Patch	1774.34
Patch	1777.48
Patch	1833.52
Patch	1838.51
Patch	1850.78
Patch	1864.96
Patch	1868.35
Patch	1873.93
Patch	1884.68
Patch	1885.6
Patch	1892.57
Patch	1897.06
Patch	1924.59
Patch	1929.15
Patch	1930.89
Patch	1936.76
Patch	1946.68
Patch	1973.64
Patch	1982.27
Patch	1993.51
Patch	1998.25
Patch	2015.21
Patch	2017.81
Patch	2029.98
Patch	2034.96
Patch	2040.58
Patch	2040.74
Patch	2043.92
Patch	2060.41
Patch	2062.32
Patch	2070.8
Patch	2075.79
Patch	2078.15
Patch	2081.76
Patch	2082.34
Patch	2096.46
Patch	2098.52
Patch	2122.81
Patch	2124.79
Patch	2125.07
Patch	2151.14
Patch	2153.76
Patch	2157.39
Patch	2164.55
Patch	2177.19
Patch	2179.54
Patch	2192.26
Patch	2194.14
Patch	2196.16
Patch	2204.5
Patch	2215.64
Patch	2237.92
Patch	2246.6
Patch	2263.71
Patch	2266.99
Patch	2278.13
Patch	2287.47
Patch	2292.06
Patch	2292.32
Patch	2292.71
Patch	2302.37
Patch	2317.54
Patch	2322.33
Patch	2328.84
Patch	2333.94
Patch	2352.7
Patch	2358.94
Patch	2364.11
Patch	2378.99
Patch	2381.52
Patch	2390.96
Patch	2391.12
Patch	2408.35
Patch	2420.87
Patch	2421.35
Patch	2438.32
Patch	2449.14
Patch	2451.84
Patch	2482.61
Patch	2553.33
Patch	2557.78
Patch	2569.53
Patch	2571.38
Patch	2573.57
Patch	2575.81
Patch	2592.14
Patch	2601.79
Patch	2606.11
Patch	2610.09
Patch	2622.9
Patch	2625.24
Patch	2636.3
Patch	2640
Patch	2641.76
Patch	2645.36
Patch	2646.94
Patch	2660.48
Patch	2662.4
Patch	2678.77
Patch	2679.33
Patch	2690.48
Patch	2703.96
Patch	2705.16
Patch	2716.4
Patch	2725.79
Patch	2729.77
Patch	2731.48
Patch	2734.68
Patch	2739.91
Patch	2742.12
Patch	2745.69
Patch	2749.65
Patch	2755.93
Patch	2773.71
Patch	2778.47
Patch	2778.57
Patch	2801.54
Patch	2812.34
Patch	2815.18
Patch	2816.71
Patch	2825.69
Patch	2833.74
Patch	2845.56
Patch	2856.99
Patch	2869.06
Patch	2875.87
Patch	2882.85
Patch	2885.86
Patch	2894.88
Patch	2895.91
Patch	2904.8
Patch	2913.79
Patch	2914.1
Patch	2932.45
Patch	2940.28
Patch	2946.59
Patch	2948.37
Patch	2952.42
Patch	2956.35
Patch	2957.46
Patch	2958.46
Patch	2965.73
Patch	2969.24
Patch	2977.65
Patch	2978.27
Patch	2982.82
Patch	2989.3
Patch	2990.22
Patch	3007.39
Patch	3013.61
Patch	3037.84
Patch	3043.93
Patch	3052.4
Patch	3068.52
Patch	3072.49
Patch	3072.95
Patch	3078.4
Patch	3081.78
Patch	3084.95
Patch	3086.05
Patch	3089.76
Patch	3093.37
Patch	3097.5
Patch	3104.59
Patch	3109.38
Patch	3119.88
Patch	3127.56
Patch	3128.39
Patch	3129.43
Patch	3133.14
Patch	3141.51
Patch	3145.9
Patch	3151.84
Patch	3159.98
Patch	3171.88
Patch	3174.45
Patch	3174.83
Patch	3178.82
Patch	3196.95
Patch	3200.43
Patch	3204.35
Patch	3206.2
Patch	3207.57
Patch	3212.25
Patch	3226.85
Patch	3228.61
Patch	3232.39
Patch	3242.8
Patch	3256.28
Patch	3265.71
Patch	3265.96
Patch	3268.06
Patch	3268.22
Patch	3269.71
Patch	3287.79
Patch	3288.85
Patch	3294.07
Patch	3304.69
Patch	3314.15
Patch	3316.58
Patch	3325.33
Patch	3326.3
Patch	3331.61
Patch	3333.82
Patch	3334.67
Patch	3346.76
Patch	3348.58
Patch	3360.76
Patch	3362.37
Patch	3368.92
Patch	3377.98
Patch	3381.99
Patch	3392.9
Patch	3395.04
Patch	3400.72
Patch	3402.43
Patch	3420.17
Patch	3421.06
Patch	3427.25
Patch	3435.08
Patch	3440.97
Patch	3445.14
Patch	3460.43
Patch	3461.13
Patch	3485.27
Patch	3487.83
Patch	3502.12
Patch	3503.76
Patch	3504.41
Patch	3507.27
Patch	3507.98
Patch	3521.62
Patch	3535.53
Patch	3554.4
Patch	3560.34
Patch	3562.4
Patch	3568.73
Patch	3578.68
Patch	3603.15
Patch	3616.55
Patch	3631.1
Patch	3633.69
Patch	3638.61
Patch	3638.94
Patch	3639.25
Patch	3640.15
Patch	3652.36
Patch	3666.83
Patch	3671.44
Patch	3679.75
Patch	3723.45
Patch	3734
Patch	3738.49
Patch	3758.22
Patch	3782.88
Patch	3789.71
Patch	3831.99
Patch	3834.76
Patch	3837.47
Patch	3879.43
Patch	3882.77
Patch	3885.49
Patch	3885.79
Patch	3893.58
Patch	3893.85
Patch	3904.67
Patch	3906.8
Patch	3907.65
Patch	3908.31
Patch	3909.29
Patch	3922.85
Patch	3932.1
Patch	3935.79
Patch	3971.42
Patch	3973.36
Patch	3976.92
Patch	3981.14
Patch	3993.56
Patch	4003.25
Patch	4005.87
Patch	4006.23
Patch	4014.43
Patch	4022.3
Patch	4028.87
Patch	4032.94
Patch	4035.02
Patch	4042
Patch	4044.79
Patch	4053.61
Patch	4054.23
Patch	4068.17
Patch	4077.15
Patch	4103.3
Patch	4104.51
Patch	4106.4
Patch	4113.67
Patch	4117.77
Patch	4123.31
Patch	4147.93
Patch	4159.22
Patch	4168.19
Patch	4186.7
Patch	4196.17
Patch	4202.9
Patch	4210.13
Patch	4223.41
Patch	4232.03
Patch	4260.13
Patch	4270.69
Patch	4273.39
Patch	4301.34
Patch	4312.48
Patch	4332.95
Patch	4352.13
Patch	4356.99
Patch	4371.36
Patch	4377.66
Patch	4385.74
Patch	4388.21
Patch	4393.47
Patch	4409.16
Patch	4415.17
Patch	4415.78
Patch	4430.64
Patch	4462.45
Patch	4474.89
Patch	4476.05
Patch	4522.84
Patch	4526.97
Patch	4528.7
Patch	4528.87
Patch	4533.87
Patch	4544.01
Patch	4545.12
Patch	4556.89
Patch	4563.07
Patch	4572.55
Patch	4592.57
Patch	4594.26
Patch	4631.35
Patch	4651.76
Patch	4659.61
Patch	4662.6
Patch	4677.27
Patch	4687.12
Patch	4692.33
Patch	4697.34
Patch	4706.01
Patch	4713.73
Patch	4733.19
Patch	4762.2
Patch	4768.86
Patch	4772.36
Patch	4787.28
Patch	4793.14
Patch	4805.26
Patch	4811.47
Patch	4820.79
Patch	4826.71
Patch	4828.43
Patch	4839.82
Patch	4841.4
Patch	4856.5
Patch	4856.68
Patch	4860.31
Patch	4871.51
Patch	4881.09
Patch	4886.87
Patch	4894.35
Patch	4895.81
Patch	4899.25
Patch	4915.28
Patch	4916.02
Patch	4916.28
Patch	4917.88
Patch	4923.5
Patch	4927.19
Patch	4932.87
Patch	4974.82
Patch	4991.26
Patch	4996.22
Patch	4998.35
Patch	5007.79
Patch	5016.83
Patch	5017.2
Patch	5026.15
Patch	5034.58
Patch	5035.75
Patch	5044.5
Patch	5045.95
Patch	5061.45
Patch	5068.02
Patch	5069.04
Patch	5072.23
Patch	5079.28
Patch	5089.49
Patch	5089.91
Patch	5093.21
Patch	5113.97
Patch	5129.97
Patch	5131.17
Patch	5133.62
Patch	5168.45
Patch	5170.35
Patch	5174.49
Patch	5180.52
Patch	5187.34
Patch	5197.23
Patch	5198.97
Patch	5205.8
Patch	5219.09
Patch	5230.41
Patch	5237.57
Patch	5243.1
Patch	5248.55
Patch	5255
Patch	5268.38
Patch	5274.23
Patch	5275.32
Patch	5275.65
Patch	5276.06
Patch	5279.21
Patch	5285.4
Patch	5289.25
Patch	5295.25
Patch	5317.53
Patch	5325.15
Patch	5338.45
Patch	5344.85
Patch	5372.58
Patch	5375.12
Patch	5375.62
Patch	5376.27
Patch	5397.63
Patch	5400.91
Patch	5401.19
Patch	5409.09
Patch	5411.04
Patch	5422.82
Patch	5425.73
Patch	5433.73
Patch	5434.44
Patch	5434.65
Patch	5443.97
Patch	5466.86
Patch	5474.08
Patch	5478.93
Patch	5482.85
Patch	5483.41
Patch	5487.2
Patch	5512.97
Patch	5523.38
Patch	5528.66
Patch	5544
Patch	5547.73
Patch	5565.44
Patch	5577.51
Patch	5584.04
Patch	5585.17
Patch	5590.15
Patch	5604.9
Patch	5606.81
Patch	5613.18
Patch	5656.65
Patch	5674.94
Patch	5675.34
Patch	5713.35
Patch	5731.57
Patch	5733.1
Patch	5737.39
Patch	5748.7
Patch	5749.39
Patch	5749.91
Patch	5766.5
Patch	5767.89
Patch	5769.08
Patch	5781.62
Patch	5795.77
Patch	5814.66
Patch	5830.29
Patch	5841.58
Patch	5846.84
Patch	5847.28
Patch	5853.18
Patch	5860.53
Patch	5862.38
Patch	5876.3
Patch	5913.17
Patch	5938.26
Patch	5940.89
Patch	5956.88
Patch	5971.81
Patch	5984.46
Patch	6010.24
Patch	6020.19
Patch	6021.67
Patch	6022.38
Patch	6025.88
Patch	6032.81
Patch	6034.99
Patch	6038.83
Patch	6053.89
Patch	6064.28
Patch	6074.44
Patch	6077.05
Patch	6078.26
Patch	6083.38
Patch	6083.66
Patch	6084.73
Patch	6089.68
Patch	6098.04
Patch	6100.48
Patch	6122.59
Patch	6125.04
Patch	6143.35
Patch	6144.94
Patch	6148.8
Patch	6153.21
Patch	6157.65
Patch	6161.95
Patch	6164.33
Patch	6170.69
Patch	6174.59
Patch	6182.6
Patch	6195.85
Patch	6229.06
Patch	6241.2
Patch	6248.13
Patch	6263.32
Patch	6264.26
Patch	6264.4
Patch	6284.47
Patch	6310.41
Patch	6348.34
Patch	6367.4
Patch	6382.92
Patch	6385.51
Patch	6392.71
Patch	6400.36
Patch	6419.46
Patch	6425.68
Patch	6450.71
Patch	6454.38
Patch	6457.43
Patch	6458.83
Patch	6467.16
Patch	6478.93
Patch	6489.46
Patch	6495.63
Patch	6499.68
Patch	6506.7
Patch	6510.52
Patch	6522.48
Patch	6525.29
Patch	6576.92
Patch	6578.22
Patch	6595.77
Patch	6597.52
Patch	6604.84
Patch	6607.77
Patch	6652.34
Patch	6661.85
Patch	6663.13
Patch	6679.54
Patch	6686.74
Patch	6691.25
Patch	6694.13
Patch	6697.96
Patch	6719.98
Patch	6744.68
Patch	6770.34
Patch	6795
Patch	6801.29
Patch	6827.84
Patch	6839.73
Patch	6856.08
Patch	6856.75
Patch	6891.47
Patch	6897.42
Patch	6903.38
Patch	6905.08
Patch	6925.62
Patch	6939.87
Patch	6940.1
Patch	7007.53
Patch	7013.32
Patch	7047.87
Patch	7059.74
Patch	7070.62
Patch	7073.13
Patch	7085.05
Patch	7086.54
Patch	7101.36
Patch	7108.07
Patch	7120.26
Patch	7131.45
Patch	7134.34
Patch	7150.85
Patch	7159.74
Patch	7166.31
Patch	7167.29
Patch	7207.03
Patch	7207.6
Patch	7209.39
Patch	7211.38
Patch	7251.93
Patch	7254.36
Patch	7263.16
Patch	7268.31
Patch	7268.46
Patch	7277.61
Patch	7283.85
Patch	7288.37
Patch	7303.99
Patch	7312.9
Patch	7316.55
Patch	7389.4
Patch	7434.13
Patch	7445.08
Patch	7445.83
Patch	7451.67
Patch	7452.5
Patch	7460.77
Patch	7463.54
Patch	7470.98
Patch	7472.31
Patch	7473.61
Patch	7475.31
Patch	7487.36
Patch	7491.76
Patch	7511.59
Patch	7516.57
Patch	7544.45
Patch	7558.73
Patch	7559.31
Patch	7648.05
Patch	7660.45
Patch	7664.82
Patch	7669.29
Patch	7676.94
Patch	7689.36
Patch	7696.6
Patch	7706.08
Patch	7722.48
Patch	7728.84
Patch	7736.29
Patch	7764.21
Patch	7802.77
Patch	7811.21
Patch	7814.98
Patch	7824.89
Patch	7848.43
Patch	7849.4
Patch	7849.67
Patch	7866.15
Patch	7890.46
Patch	7903.75
Patch	7909.52
Patch	7911.59
Patch	7918.7
Patch	7924.39
Patch	7930.79
Patch	7956.03
Patch	7984.37
Patch	7994.96
Patch	8011.14
Patch	8018.03
Patch	8019.02
Patch	8043.71
Patch	8044.97
Patch	8047.05
Patch	8051.89
Patch	8058.63
Patch	8074.3
Patch	8087.72
Patch	8094.17
Patch	8132.42
Patch	8150.75
Patch	8168.81
Patch	8185.77
Patch	8189.49
Patch	8200.24
Patch	8201.55
Patch	8214.85
Patch	8233.84
Patch	8241.68
Patch	8243.8
Patch	8248.61
Patch	8257.1
Patch	8285.82
Patch	8298.53
Patch	8310.74
Patch	8313.36
Patch	8322.05
Patch	8327.81
Patch	8329.57
Patch	8339.73
Patch	8339.9
Patch	8366.41
Patch	8412.39
Patch	8439.2
Patch	8444.29
Patch	8451.59
Patch	8459.31
Patch	8468.94
Patch	8470.86
Patch	8507.15
Patch	8523.19
Patch	8546.96
Patch	8555.85
Patch	8564.69
Patch	8575.47
Patch	8594.89
Patch	8628.61
Patch	8644.6
Patch	8665.76
Patch	8687.46
Patch	8690.05
Patch	8692.43
Patch	8766.53
Patch	8795.62
Patch	8811.15
Patch	8824.5
Patch	8833.06
Patch	8837.9
Patch	8842.62
Patch	8856.74
Patch	8864.1
Patch	8873.77
Patch	8874.9
Patch	8952.06
Patch	8965.79
Patch	8993.16
Patch	9013.39
Patch	9015.47
Patch	9023.28
Patch	9059.25
Patch	9080.3
Patch	9100.22
Patch	9106.32
Patch	9116.09
Patch	9125.8
Patch	9172.93
Patch	9173.58
Patch	9183.2
Patch	9210.11
Patch	9215.88
Patch	9216.34
Patch	9247.7
Patch	9270.51
Patch	9273.68
Patch	9281.33
Patch	9290.13
Patch	9320.3
Patch	9324.2
Patch	9326.68
Patch	9346.53
Patch	9378.66
Patch	9385.63
Patch	9477.12
Patch	9495.91
Patch	9517.54
Patch	9524.92
Patch	9535.69
Patch	9575.11
Patch	9592.77
Patch	9597.75
Patch	9641.9
Patch	9670.73
Patch	9680.8
Patch	9686.57
Patch	9689.09
Patch	9765.84
Patch	9793.01
Patch	9808.54
Patch	9815.47
Patch	9855.29
Patch	9858.15
Patch	9876.52
Patch	9876.82
Patch	9888.19
Patch	9892.33
Patch	9903.53
Patch	9907.1
Patch	9917.11
Patch	9924.71
Patch	10058.2
Patch	10087.5
Patch	10153.3
Patch	10162.2
Patch	10175.1
Patch	10187.2
Patch	10215.1
Patch	10231.8
Patch	10237
Patch	10255.6
Patch	10261.6
Patch	10274.1
Patch	10293.2
Patch	10329.7
Patch	10331.8
Patch	10357.6
Patch	10385.9
Patch	10389.3
Patch	10411.9
Patch	10422.1
Patch	10461.4
Patch	10479.3
Patch	10502.4
Patch	10536.2
Patch	10536.6
Patch	10541.5
Patch	10551.4
Patch	10574
Patch	10627.3
Patch	10662.1
Patch	10728.8
Patch	10763.1
Patch	10771.4
Patch	10798.7
Patch	10837.7
Patch	10848.4
Patch	10852.1
Patch	10882.6
Patch	10911.8
Patch	11004.1
Patch	11017.8
Patch	11027.9
Patch	11043.4
Patch	11062.3
Patch	11134.9
Patch	11203.1
Patch	11215.9
Patch	11229.2
Patch	11234.5
Patch	11261.7
Patch	11294.3
Patch	11336.3
Patch	11340.2
Patch	11359.9
Patch	11372.5
Patch	11372.7
Patch	11502.4
Patch	11610.4
Patch	11731.4
Patch	11771.8
Patch	11868.3
Patch	11878.9
Patch	11919.5
Patch	12101.8
Patch	13264
Patch	13306.7
Patch	13376.7
EL	3350.07
EL	2089.46
EL	3144.07
EL	4176.93
EL	3436.72
EL	4048.96
EL	6950.29
EL	1779.65
EL	3332.22
EL	4043.42
EL	6319.04
EL	2806.07
EL	5136.8
EL	4697.43
EL	2752.21
EL	3730.3
EL	5413.26
EL	4543.63
EL	5132.73
EL	3450.06
EL	3324.03
EL	5004.52
EL	7823.69
EL	3385.39
EL	4265.2
EL	3087.03
EL	938.806
EL	3969.81
EL	7890.33
EL	2576.01
EL	4437.03
EL	3868.44
EL	2382.2
EL	4165.19
EL	1728.28
EL	4964.13
EL	3629.2
EL	4311.53
EL	1875.5
EL	2960.2
EL	4055.28
EL	4539.84
EL	3751.43
EL	3575.21
EL	487.715
EL	871.665
EL	1297.12
EL	8030.75
EL	5260.39
EL	2301.13
EL	6619.68
EL	3360.06
EL	1245.9
EL	3360.06
EL	2498.74
EL	3138.81
EL	5464.67
EL	6737.28
EL	3319.18
EL	4178.25
EL	3676.63
EL	4508.3
EL	6166.61
EL	1770.89
EL	4751.2
EL	3661.78
EL	2868.11
EL	6675.26
EL	6738.19
EL	3564.95
EL	2801.96
EL	5089.6
EL	5682.58
EL	1937.6
EL	2598.53
EL	2598.53
EL	3227.47
EL	3529.69
EL	4367.42
EL	2630.46
EL	4626.05
EL	5243.86
EL	4226.93
EL	4284.22
EL	2775.2
EL	2593.35
EL	2880.29
EL	4135.65
EL	4236.97
EL	1997.19
EL	1997.19
EL	1922.18
EL	4050.74
EL	8681.85
EL	4722.21
EL	5234.93
EL	3639.26
EL	3007.63
EL	3066.01
EL	3948.51
EL	3486.5
EL	1700.8
EL	3328.33
EL	4356.59
EL	5094.48
EL	2422.91
EL	1898.53
EL	3056.5
EL	2410.21
EL	3243.65
EL	2767.92
EL	2824.35
EL	2347.16
EL	1490.46
EL	1233.72
EL	4265.77
EL	3297.86
EL	3358.85
EL	5188.44
EL	935.208
EL	3325.93
EL	5219.33
EL	5442.29
EL	7198.45
EL	2248.08
EL	4233.82
EL	2438.87
EL	3366.6
EL	7725.91
EL	5289.21
EL	5150.17
EL	2538.08
EL	3671.55
EL	4442.94
EL	3800.21
EL	2726.24
EL	3028.52
EL	4298.84
EL	2916.4
EL	5551.43
EL	4341.27
EL	6651.36
EL	3681.12
EL	1774.67
EL	2860.3
EL	3439.66
EL	1773.01
EL	1752.37
EL	1223.48
EL	1849.97
EL	1627.98
EL	2970.89
EL	5937.9
EL	1818.22
EL	6663.7
EL	3273.78
EL	1250.78
EL	823.624
EL	4840.44
EL	2147.13
EL	1835.69
EL	1866.61
EL	2758.46
EL	1184.45
EL	2219.55
EL	547.137
EL	1559.33
EL	1491.82
EL	2075.01
EL	2745.81
EL	8137.23
EL	4702.89
EL	4443.59
EL	3868.31
EL	4022.72
EL	5219.76
EL	13077
EL	3899.21
EL	4835.58
EL	3092.9
EL	3559.02
EL	2533.61
EL	3467.7
EL	3019.74
EL	1647.35
EL	1956.18
EL	3700.62
EL	4471.07
EL	3586.23
EL	3424.38
EL	3696.66
EL	2869.82
EL	3910.57
EL	3602.5
EL	2425.33
EL	5962.24
EL	2373.91
EL	2465.77
EL	3201.93
EL	1138.08
EL	1446.15
EL	2083.38
EL	2809.73
EL	2305.49
EL	2426.35
EL	3606.9
EL	3415.47
EL	3344.38
EL	2771.56
EL	2771.56
EL	4283.58
EL	7139.23
EL	3672.06
EL	5056.86
EL	5308.51
EL	2162.58
EL	2957.01
EL	3113.48
EL	4279.93
EL	2664.12
EL	3676.5
EL	3676.5
EL	3185.02
EL	3190.43
EL	2545.75
EL	2512.92
EL	2945.17
EL	3565.87
EL	4627.14
EL	4489.84
EL	664.354
EL	2993.3
EL	4035.04
EL	5272.61
EL	2498.38
EL	2908.89
EL	1538.54
EL	2800.35
EL	2711.27
EL	2110.42
EL	3688.06
EL	3295.67
EL	1144.67
EL	1497.16
EL	3924.07
EL	4370
EL	2789.77
EL	2757.25
EL	6551.53
EL	1985.28
EL	2415.73
EL	1904.62
EL	4617.52
EL	3528.3
EL	4755.04
EL	6196.5
EL	1216.4
EL	1249.67
EL	2336.87
EL	2039.61
EL	555.09
EL	1959.03
EL	2819.93
EL	3082.44
EL	1249.82
EL	5766.57
EL	1058.58
EL	2014.68
EL	4293.75
EL	2043.06
EL	1240.96
EL	4445.77
EL	7081.83
EL	3731.48
EL	2085.9
EL	1056.5
EL	2241.59
EL	2448.08
EL	4209.32
EL	5769.55
EL	4230.63
EL	2373.91
EL	5115.42
EL	2271.22
EL	2833.84
EL	3604.58
EL	4663.86
EL	1183.64
EL	5225.43
EL	2839.27
EL	2093.13
EL	3315.32
EL	7262.09
EL	1814.76
EL	2983.45
EL	2281.43
EL	3937.1
EL	4832.5
EL	4187.79
EL	5983.33
EL	3229.62
EL	1957.11
EL	3591.95
EL	4103.28
EL	8816.55
EL	1633.84
EL	9743.43
EL	3328.31
EL	2147.43
RH	1498.31
RH	1251.49
RH	5728.31
RH	1648.45
RH	859.884
RH	2653.49
RH	985.349
RH	718.791
RH	887.566
RH	1768.88
RH	1144.51
RH	3565.42
RH	1139.06
RH	1909.83
RH	882.534
RH	486.079
RH	399.025
RH	1038.25
RH	1121.75
RH	975.28
RH	1175
RH	1328.24
RH	1557.12
RH	1702.14
RH	2080.08
RH	1902.36
RH	2041.28
RH	897.791
RH	881.157
RH	1081.91
RH	1051.12
RH	2361.06
RH	2365.33
RH	924.439
RH	2016.16
RH	2754.89
RH	989.168
RH	380.816
RH	7042.81
RH	4045.75
RH	2476
RH	2415.01
RH	1425.73
RH	1300.6
RH	2587.64
RH	3553.13
RH	917.365
RH	2119.93
RH	1601.16
RH	2737.14
RH	855.731
RH	2576.28
RH	1268.67
RH	4500.71
RH	1822.49
RH	1782.28
RH	2280.38
RH	2052.26
RH	1140.05
RH	2649.46
RH	2980.36
RH	7363
RH	2019.13
RH	3707.37
RH	1891.74
RH	3712.26
RH	2663.52
RH	7933.4
RH	1067.59
RH	885.117
RH	2554.84
RH	741.363
RH	8545.8
RH	3378.57
RH	1729.06
RH	2580.84
RH	2233.19
RH	2074.53
RH	4359.94
RH	2985.76
RH	2494.51
RH	5531.47
RH	2387.23
RH	2165.89
RH	2582.77
RH	9031.96
RH	15774.2
RH	3877.35
RH	4141.11
RH	1853.59
RH	879.408
RH	1725.75
RH	2171.85
RH	3911.59
RH	3227.28
RH	2344.81
RH	3447.01
RH	1514.07
RH	993.763
RH	2309.03
RH	6073.68
RH	689.282
RH	2813.61
RH	1079.91
RH	1309.81
RH	1088.43
RH	3082.68
RH	1663.07
RH	2011.99
RH	652.149
RH	588.576
RH	2620.99
RH	729.117
RH	1208.71
RH	1369.17
RH	1444.8
RH	2229.2
RH	2660.59
RH	4889.28
RH	2460.94
RH	2423.69
RH	1095.89
RH	2809.11
RH	2850.4
RH	1159.34
RH	1511.16
RH	1166.29
RH	2687.95
RH	15733.8
RH	1757.16
RH	5950.09
RH	3745.15
RH	3144.61
RH	1273.6
RH	5381.06
RH	1580.19
RH	2199.04
RH	5234.69
RH	1384.77
RH	2766.29
RH	578.626
RH	9324.7
RH	1629.41
RH	2321.1
RH	1235.99
RH	1515.48
RH	3404.65
RH	1332.35
RH	4402.83
RH	5068.3
RH	2767.23
RH	2901.65
RH	2904.13
RH	1558.27
RH	2837.44
RH	5820.98
RH	1653.87
RH	2668.56
RH	819.704
RH	2503.05
RH	3065.25
RH	2294.4
RH	3659.06
RH	1978.2
RH	1922.71
RH	3578.12
RH	1528.3
RH	3070.99
RH	1555.58
RH	1617.52
RH	12598.9
RH	3224.85
RH	8497.95
RH	3496.24
RH	577.211
RH	1782.51
RH	1427.05
RH	1098.59
RH	1932.08
RH	2469.66
RH	7501.49
RH	3927.25
RH	1144.22
RH	1443.41
RH	3911.28
RH	1746.37
RH	6967.06
RH	1222.64
RH	1311.66
RH	537.985
RH	2678.27
RH	7547.02
RH	2511.89
RH	2182.62
RH	3767.3
RH	3285.61
RH	2936.92
RH	2336.11
RH	4211.78
RH	3565.22
RH	3370.48
RH	541.576
RH	1224.29
RH	2355.33
RH	1749.36
RH	1765.67
RH	2513.21
RH	2085.36
RH	4292.89
RH	2043.52
RH	1299.21
ZE	7084.78
ZE	6633.56
ZE	1868.31
ZE	5000.54
ZE	6314.38
ZE	603.673
ZE	1723.33
ZE	5180.25
ZE	1155.9
ZE	6391.93
ZE	2310.19
ZE	6897.3
ZE	1891.61
ZE	2338.05
ZE	1509.75
ZE	1509.75
ZE	8749.91
ZE	1521.72
ZE	7237.09
ZE	9695.35
ZE	3317.96
ZE	4634.65
ZE	8423.23
ZE	9412.6
ZE	3495.94
ZE	15087.9
ZE	9051.9
ZE	1936.4
ZE	2183.27
ZE	10665.7
ZE	3960.59
ZE	2383.59
ZE	6707.43
ZE	1965.61
ZE	2649.85
ZE	8972.75
ZE	16840.8
ZE	3879.69
ZE	1069.74
ZE	4510.98
ZE	1569.99
ZE	1476.49
ZE	2253.02
ZE	2317.33
ZE	6770.73
ZE	4963.74
ZE	3249.19
ZE	5109.26
ZE	1886.05
ZE	3946.06
ZE	2161.77
ZE	1221.77
ZE	3150.59
ZE	3303.29
ZE	1240.18
ZE	3893.57
ZE	4877.05
ZE	5225.26
ZE	17560
ZE	1509.22
ZE	10814.3
ZE	5710.79
ZE	1988.44
ZE	2259.56
ZE	1853.51
ZE	5261.75
ZE	6954.76
ZE	2595.03
ZE	3884.61
ZE	4128.09
ZE	8657.62
ZE	2294.78
ZE	2956.6
ZE	3924.66
ZE	2423.33
ZE	3323.91
ZE	5276.6
ZE	7009.89
ZE	2227.43
ZE	2230.29
ZE	1990.1
ZE	3208.22
ZE	4104.8
ZE	2136.71
ZE	2361.9
ZE	1634.75
ZE	5521.43
ZE	1903.29
ZE	3151.88
ZE	2793.58
ZE	6957.31
ZE	668.582
ZE	1697.34
ZE	1417.44
ZE	1794.31
ZE	1848.83
ZE	5521.43
ZE	1999.74
ZE	1499.49
ZE	3278.84
ZE	1046.89
ZE	2093.96
ZE	3288.53
ZE	1874.91
ZE	6482.29
ZE	4641.52
ZE	9499.03
ZE	2944.22
ZE	8261.18
ZE	7120.03
ZE	3661.08
ZE	2194.67
ZE	6273.41
ZE	252.052
ZE	5095.78
ZE	1732.15
ZE	5237.25
ZE	2547.16
ZE	2274.05
ZE	2377.4
ZE	7557.45
ZE	19208.3
ZE	2792.84
ZE	7179.62
ZE	3552.77
ZE	2700.31
ZE	1645.12
ZE	4630.99
ZE	1397.85
ZE	1802.53
ZE	1609.92
ZE	1443.65
ZE	4270.29
ZE	6544.78
ZE	3030.4
ZE	6544.78
ZE	16157.1
ZE	6491.56
ZE	1219.04
ZE	1868.6
ZE	1335.92
ZE	1089.67
ZE	6592.06
ZE	3181.34
ZE	3807.74
ZE	4933.27
ZE	2336.2
ZE	4569.67
ZE	2553.17
ZE	2650.72
ZE	1698.7
ZE	1943.65
ZE	3656.77
ZE	3968.4
ZE	2079.55
ZE	3341.68
ZE	4952.51
ZE	1443.65
ZE	3064.6
ZE	8281.95
ZE	5232.38
ZE	3286.34
ZE	5006.06
ZE	1891.6
ZE	2228.72
ZE	3405.23
ZE	9055.16
ZE	12124.7
ZE	2460.94
ZE	15092
ZE	1022.94
ZE	9209
ZE	3118.28
ZE	3084.55
ZE	6194.76
ZE	5534.68
ZE	2281.44
ZE	1357.66
ZE	15092
ZE	12372.6
ZE	3350.68
ZE	2146.88
ZE	2548.9
ZE	8280.69
ZE	5452.55
ZE	934.888
ZE	9603.67
ZE	4891.65
ZE	5907.38
ZE	4114.07
ZE	2354.64
ZE	2433
ZE	9792.96
ZE	2511.4
ZE	2281.44
ZE	2425.29
ZE	1553.12
ZE	1665.71
ZE	9343.16
ZE	8713.86
ZE	3979.11
ZE	2354.64
ZE	8799.72
ZE	19888.8
ZE	2645.88
ZE	9836.23
ZE	1831.36
ZE	1513.45
ZE	12671.5
ZE	2855.31
ZE	4785.05
ZE	1051.72
ZE	2989.03
ZE	8052.87
ZE	5930.2
ZE	4995.22
ZE	6006.87
ZE	7384.17
ZE	3173.19
ZE	7335.58
ZE	8284.9
ZE	3054.56
ZE	2317.19
ZE	5406.93
ZE	8609.89
ZE	2034.9
ZE	3974.46
ZE	2480.96
ZE	2480.96
ZE	5679.84
ZE	3610.06
ZE	2081.79
ZE	5186.74
ZE	1751.03
ZE	2264.01
ZE	19835.6
ZE	2045.6
ZE	5263.6
ZE	3993.01
ZE	8492.24
ZE	3733.71
ZE	5247
ZE	2080.1
ZE	17286.9
ZE	8655.53
ZE	8064.23
ZE	5721
ZE	16322.6
ZE	4783.74
ZE	12288
ZE	9506.63
ZE	3047.61
ZE	4395.65
ZE	3365.91
ZE	8259.84
ZE	7623.38
ZE	5721
ZE	2621.22
ZE	7053.51
ZE	9827.88
ZE	6782.86
ZE	14132.1
ZE	7968.57
ZE	8297.31
ZE	6482.35
ZE	4468.26
ZE	13995.1
ZE	16533.7
ZE	7460.69
ZE	5182.67
ZE	11903.4
ZE	4594.23
ZE	16387.7
ZE	8222.34
ZE	8505.79
ZE	3178.43
ZE	3407.17
ZE	2340.18
