# Supplementary material for: Ungulates rely less on visual cues, but more on adapting movement behaviour, when searching for forage
Source: PeerJ. 2017 May 16;5:e3178. doi: 10.7717/peerj.3178 (PMC5436584; doi:10.7717/peerj.3178)
Supplement: Supplemental Information 2 [file peerj-05-3178-s002.xlsx]

## Sheet: All
Walk	Animal_ID	Species	PointDATE	Longitude	Latitude	ID_F	ID_NR	STEPLENGTH	TURNANGLE	Success	View
64W1	SAT64EL	EL	2011-08-11	-31.3	29.9696	84	12	1.65246	32.7962	2	1	1
64W1	SAT64EL	EL	2011-08-11	-31.3026	29.973	84	2	1.75571	-13.4157	2	1	2
64W1	SAT64EL	EL	2011-08-11	-31.3071	29.9905	84	19	1.7558	56.6278	2	1	3
64W1	SAT64EL	EL	2011-08-11	-31.3026	29.973	84	3	8.05824	-89.999	2	1	4
64W1	SAT64EL	EL	2011-08-11	-31.3026	29.9729	84	1	8.81245	-999	2	1	5
64W1	SAT64EL	EL	2011-08-11	-31.2998	29.9697	84	7	14.1807	146.215	2	1	6
64W1	SAT64EL	EL	2011-08-11	-31.2999	29.9698	84	11	18.4296	13.4906	2	1	7
64W1	SAT64EL	EL	2011-08-11	-31.2999	29.9697	84	8	19.9319	114.671	2	1	8
64W1	SAT64EL	EL	2011-08-11	-31.2997	29.97	84	10	24.959	154.221	2	1	9
64W1	SAT64EL	EL	2011-08-11	-31.3	29.9695	84	6	26.9188	83.1958	2	1	10
64W1	SAT64EL	EL	2011-08-11	-31.2999	29.9695	84	9	51.495	141.932	2	1	11
64W1	SAT64EL	EL	2011-08-11	-31.3025	29.973	84	4	62.1808	-0.000118643	2	1	12
64W1	SAT64EL	EL	2011-08-11	-31.3058	29.9911	84	17	67.2329	66.3004	2	1	13
64W1	SAT64EL	EL	2011-08-11	-31.3064	29.991	84	18	103.272	23.1062	2	1	14
64W1	SAT64EL	EL	2011-08-11	-31.3042	29.9884	84	16	344.46	2.10738	2	1	15
64W1	SAT64EL	EL	2011-08-11	-31.302	29.973	84	5	425.186	-56.5263	2	1	16
64W1	SAT64EL	EL	2011-08-11	-31.302	29.9842	84	15	508.807	-2.14054	2	1	17
64W1	SAT64EL	EL	2011-08-11	-31.2983	29.9779	84	14	784.942	46.968	2	1	18
64W1	SAT64EL	EL	2011-08-11	-31.3	29.9696	84	13	876.035	167.046	2	1	19
64W10	SAT64EL	EL	2011-09-17	-31.2933	30.0096	84	1806	1.75631	81.3714	2	1	20
64W10	SAT64EL	EL	2011-09-17	-31.2933	30.0097	84	1807	1.75631	-180	2	1	21
64W10	SAT64EL	EL	2011-09-17	-31.2933	30.0096	84	1808	2.69574	-130.655	2	1	22
64W10	SAT64EL	EL	2011-09-18	-31.2943	30.0039	84	1817	3.97552	45.8362	2	1	23
64W10	SAT64EL	EL	2011-09-17	-31.293	30.0092	84	1811	5.16563	-49.3451	2	1	24
64W10	SAT64EL	EL	2011-09-17	-31.2929	30.0091	84	1810	7.92863	-171.805	2	1	25
64W10	SAT64EL	EL	2011-09-17	-31.2944	30.0039	84	1816	22.6122	165.48	2	1	26
64W10	SAT64EL	EL	2011-09-17	-31.2936	30.0096	84	1805	34.4349	144.956	2	1	27
64W10	SAT64EL	EL	2011-09-18	-31.2942	30.004	84	1818	67.1501	30.9582	2	1	28
64W10	SAT64EL	EL	2011-09-17	-31.2933	30.0097	84	1809	73.1279	171.804	2	1	29
64W10	SAT64EL	EL	2011-09-17	-31.293	30.0102	55	1804	99.7936	73.4641	2	1	30
64W10	SAT64EL	EL	2011-09-18	-31.2942	30.0046	84	1819	105.986	68.0208	2	1	31
64W10	SAT64EL	EL	2011-09-17	-31.293	30.0092	84	1812	120.49	-166.489	2	1	32
64W10	SAT64EL	EL	2011-09-17	-31.2921	30.0097	84	1803	124.76	23.4621	2	1	33
64W10	SAT64EL	EL	2011-09-17	-31.2933	30.0046	84	1815	151.665	-49.3063	2	1	34
64W10	SAT64EL	EL	2011-09-17	-31.293	30.0061	84	1814	160.823	-3.50088	2	1	35
64W10	SAT64EL	EL	2011-09-17	-31.2911	30.0081	84	1802	197.657	-174.037	2	1	36
64W10	SAT64EL	EL	2011-09-17	-31.2927	30.0081	84	1813	207.696	-22.9798	2	1	37
64W10	SAT64EL	EL	2011-09-17	-31.2922	30.0103	84	1801	258.554	-92.0554	2	1	38
64W10	SAT64EL	EL	2011-09-17	-31.2953	30.008	84	1800	441.429	-999	2	1	39
64W11	SAT64EL	EL	2011-09-22	-31.2718	30.0279	17	2009	2.04542	-44.0908	1	2	40
64W11	SAT64EL	EL	2011-09-22	-31.2674	30.0326	33	2017	2.0455	-51.585	1	2	41
64W11	SAT64EL	EL	2011-09-21	-31.2716	30.0285	17	2000	3.97054	-999	1	2	42
64W11	SAT64EL	EL	2011-09-21	-31.2718	30.0278	17	2007	9.17292	-146.992	1	2	43
64W11	SAT64EL	EL	2011-09-21	-31.2719	30.0278	17	2008	22.2805	175.075	1	2	44
64W11	SAT64EL	EL	2011-09-22	-31.2674	30.0326	33	2018	23.0824	-17.4588	1	2	45
64W11	SAT64EL	EL	2011-09-21	-31.2716	30.0285	17	2001	25.4513	61.7864	1	2	46
64W11	SAT64EL	EL	2011-09-21	-31.2715	30.0288	17	2002	31.8062	-42.8241	1	2	47
64W11	SAT64EL	EL	2011-09-21	-31.2712	30.0289	17	2003	40.3984	168.387	1	2	48
64W11	SAT64EL	EL	2011-09-22	-31.2677	30.0323	33	2016	48.413	177.932	1	2	49
64W11	SAT64EL	EL	2011-09-22	-31.2716	30.0287	17	2011	49.9612	9.06687	1	2	50
64W11	SAT64EL	EL	2011-09-21	-31.2723	30.0277	17	2006	62.5866	168.785	1	2	51
64W11	SAT64EL	EL	2011-09-22	-31.2717	30.0279	17	2010	80.8704	78.5863	1	2	52
64W11	SAT64EL	EL	2011-09-21	-31.2716	30.0288	17	2004	217.56	-177.778	1	2	53
64W11	SAT64EL	EL	2011-09-22	-31.2687	30.0328	55	2013	271.206	-4.51223	1	2	54
64W11	SAT64EL	EL	2011-09-22	-31.267	30.0345	55	2014	306.5	-2.85572	1	2	55
64W11	SAT64EL	EL	2011-09-21	-31.2698	30.0292	33	2005	342.736	-162.348	1	2	56
64W11	SAT64EL	EL	2011-09-22	-31.2716	30.0292	55	2012	512.699	-40.8363	1	2	57
64W11	SAT64EL	EL	2011-09-22	-31.265	30.0364	55	2015	534.758	-165.795	1	2	58
64W11	SAT64EL	EL	2011-09-22	-31.2672	30.0326	33	2019	556.529	-40.5596	1	2	59
64W12	SAT64EL	EL	2011-09-26	-31.2806	30.0134	3	2207	2.69606	-28.9064	2	1	60
64W12	SAT64EL	EL	2011-09-26	-31.282	30.0032	3	2218	3.97597	-175.529	2	1	61
64W12	SAT64EL	EL	2011-09-26	-31.2806	30.0134	3	2206	5.51352	-164.155	2	1	62
64W12	SAT64EL	EL	2011-09-26	-31.2751	30.0113	34	2211	5.55687	-84.0937	2	1	63
64W12	SAT64EL	EL	2011-09-26	-31.2805	30.0135	3	2204	7.18585	58.1456	2	1	64
64W12	SAT64EL	EL	2011-09-26	-31.2805	30.0136	3	2205	23.5852	159.259	2	1	65
64W12	SAT64EL	EL	2011-09-26	-31.2812	30.014	3	2201	34.6238	117.312	2	1	66
64W12	SAT64EL	EL	2011-09-26	-31.2818	30.0036	3	2217	48.564	77.1046	2	1	67
64W12	SAT64EL	EL	2011-09-26	-31.2827	30.0026	3	2214	96.2996	76.2548	2	1	68
64W12	SAT64EL	EL	2011-09-26	-31.2795	30.0103	27	2209	127.939	-76.2433	2	1	69
64W12	SAT64EL	EL	2011-09-26	-31.2808	30.0031	3	2216	130.239	122.8	2	1	70
64W12	SAT64EL	EL	2011-09-26	-31.281	30.0138	3	2202	151.233	-115.565	2	1	71
64W12	SAT64EL	EL	2011-09-26	-31.2821	30.002	3	2215	187.812	76.1215	2	1	72
64W12	SAT64EL	EL	2011-09-26	-31.282	30.013	3	2203	190.163	161.577	2	1	73
64W12	SAT64EL	EL	2011-09-26	-31.282	30.0032	3	2219	308.944	-118.195	2	1	74
64W12	SAT64EL	EL	2011-09-26	-31.2806	30.0134	3	2208	348.254	-109.032	2	1	75
64W12	SAT64EL	EL	2011-09-26	-31.2783	30.0161	3	2200	411.237	-999	2	1	76
64W12	SAT64EL	EL	2011-09-26	-31.275	30.0113	34	2212	477.641	-105.808	2	1	77
64W12	SAT64EL	EL	2011-09-26	-31.2803	30.0096	27	2210	662.289	160.301	2	1	78
64W12	SAT64EL	EL	2011-09-26	-31.279	30.0108	27	2213	953.176	56.504	2	1	79
64W13	SAT64EL	EL	2011-09-30	-31.3016	29.9687	36	2411	2.04458	-176.269	2	1	80
64W13	SAT64EL	EL	2011-09-30	-31.3016	29.9687	36	2412	5.16379	89.999	2	1	81
64W13	SAT64EL	EL	2011-09-30	-31.3002	29.9687	36	2408	16.8086	127.96	2	1	82
64W13	SAT64EL	EL	2011-09-30	-31.3004	29.9688	36	2409	22.941	133.684	2	1	83
64W13	SAT64EL	EL	2011-09-30	-31.3001	29.9729	36	2419	66.2826	-24.7285	2	1	84
64W13	SAT64EL	EL	2011-09-30	-31.3085	29.9754	36	2403	67.1928	-23.1657	2	1	85
64W13	SAT64EL	EL	2011-09-30	-31.2996	29.9725	36	2418	70.2799	83.1942	2	1	86
64W13	SAT64EL	EL	2011-09-30	-31.3092	29.9757	36	2402	86.65	-111.024	2	1	87
64W13	SAT64EL	EL	2011-09-30	-31.3009	29.9682	36	2407	91.992	68.9524	2	1	88
64W13	SAT64EL	EL	2011-09-30	-31.3001	29.9714	36	2417	126.039	75.6685	2	1	89
64W13	SAT64EL	EL	2011-09-30	-31.3091	29.9744	36	2401	139.544	-73.0826	2	1	90
64W13	SAT64EL	EL	2011-09-30	-31.3003	29.9686	36	2410	158.731	-119.523	2	1	91
64W13	SAT64EL	EL	2011-09-30	-31.3073	29.9738	36	2400	227.657	-999	2	1	92
64W13	SAT64EL	EL	2011-09-30	-31.3015	29.9715	36	2414	248.523	6.56061	2	1	93
64W13	SAT64EL	EL	2011-09-30	-31.3016	29.9739	36	2415	270.234	122.601	2	1	94
64W13	SAT64EL	EL	2011-09-30	-31.3081	29.975	36	2404	275.461	-17.1826	2	1	95
64W13	SAT64EL	EL	2011-09-30	-31.3016	29.9687	36	2413	287.671	-2.39529	2	1	96
64W13	SAT64EL	EL	2011-09-30	-31.303	29.9699	36	2406	307.591	-3.07642	2	1	97
64W13	SAT64EL	EL	2011-09-30	-31.3035	29.9723	36	2416	409.624	130.122	2	1	98
64W13	SAT64EL	EL	2011-09-30	-31.3069	29.9727	36	2405	556.291	27.1679	2	1	99
64W14	SAT64EL	EL	2011-10-04	-31.2985	29.9654	36	2608	2.60491	117.813	2	1	100
64W14	SAT64EL	EL	2011-10-04	-31.3036	29.97	36	2619	10.3274	146.103	2	1	101
64W14	SAT64EL	EL	2011-10-04	-31.2985	29.9655	36	2609	30.0836	-108.814	2	1	102
64W14	SAT64EL	EL	2011-10-04	-31.3013	29.9653	36	2617	48.1388	156.665	2	1	103
64W14	SAT64EL	EL	2011-10-04	-31.2975	29.9618	36	2601	53.0699	-115.91	2	1	104
64W14	SAT64EL	EL	2011-10-04	-31.2987	29.968	36	2606	64.7207	-33.6149	2	1	105
64W14	SAT64EL	EL	2011-10-04	-31.2961	29.9709	36	2614	75.1667	-115.75	2	1	106
64W14	SAT64EL	EL	2011-10-04	-31.2997	29.969	36	2604	118.796	-98.6541	2	1	107
64W14	SAT64EL	EL	2011-10-04	-31.2987	29.9691	36	2605	120.592	-93.103	2	1	108
64W14	SAT64EL	EL	2011-10-04	-31.2974	29.9606	36	2600	125.704	-999	2	1	109
64W14	SAT64EL	EL	2011-10-04	-31.2984	29.9652	36	2610	130.759	113.973	2	1	110
64W14	SAT64EL	EL	2011-10-04	-31.2989	29.9696	36	2612	142.037	-50.1868	2	1	111
64W14	SAT64EL	EL	2011-10-04	-31.299	29.9674	36	2607	215.227	46.2915	2	1	112
64W14	SAT64EL	EL	2011-10-04	-31.2983	29.9708	36	2613	272.852	-60.0732	2	1	113
64W14	SAT64EL	EL	2011-10-04	-31.2991	29.9658	36	2603	340.084	-14.9803	2	1	114
64W14	SAT64EL	EL	2011-10-04	-31.2963	29.9702	36	2615	378.582	-2.82968	2	1	115
64W14	SAT64EL	EL	2011-10-04	-31.2977	29.9661	36	2611	383.58	64.8957	2	1	116
64W14	SAT64EL	EL	2011-10-04	-31.2977	29.9669	36	2616	456.021	-42.3464	2	1	117
64W14	SAT64EL	EL	2011-10-04	-31.297	29.9616	36	2602	502.051	143.607	2	1	118
64W14	SAT64EL	EL	2011-10-04	-31.3009	29.9653	36	2618	578.562	125.99	2	1	119
64W15	SAT64EL	EL	2011-10-08	-31.2987	29.9683	36	2800	2.04458	-999	3	2	120
64W15	SAT64EL	EL	2011-10-08	-31.3006	29.9983	84	2811	5.55486	1.69648	3	2	121
64W15	SAT64EL	EL	2011-10-08	-31.3013	30.0005	84	2809	23.2081	85.8334	3	2	122
64W15	SAT64EL	EL	2011-10-08	-31.3006	29.9982	84	2812	35.0211	168.288	3	2	123
64W15	SAT64EL	EL	2011-10-08	-31.2996	29.9991	84	2814	88.721	-146.948	3	2	124
64W15	SAT64EL	EL	2011-10-08	-31.3006	29.9986	84	2813	131.188	-74.2256	3	2	125
64W15	SAT64EL	EL	2011-10-08	-31.3025	30.0001	84	2808	146.473	-96.6549	3	2	126
64W15	SAT64EL	EL	2011-10-08	-31.3019	29.9988	84	2807	147.366	-145.025	3	2	127
64W15	SAT64EL	EL	2011-10-08	-31.3	29.9984	84	2815	201.784	-120.231	3	2	128
64W15	SAT64EL	EL	2011-10-08	-31.2923	30.0102	84	2818	206.468	-39.2723	3	2	129
64W15	SAT64EL	EL	2011-10-08	-31.3016	30.0008	84	2806	214.475	115.258	3	2	130
64W15	SAT64EL	EL	2011-10-08	-31.2906	30.0101	84	2819	228.309	-5.93966	3	2	131
64W15	SAT64EL	EL	2011-10-08	-31.3014	30.0008	84	2810	271.018	-175.118	3	2	132
64W15	SAT64EL	EL	2011-10-08	-31.2986	29.9683	36	2801	329.377	37.6948	3	2	133
64W15	SAT64EL	EL	2011-10-08	-31.3008	30.0001	84	2816	526.636	-59.9142	3	2	134
64W15	SAT64EL	EL	2011-10-08	-31.298	29.9979	84	2805	527.251	33.2944	3	2	135
64W15	SAT64EL	EL	2011-10-08	-31.2955	29.9872	84	2803	552.207	11.3951	3	2	136
64W15	SAT64EL	EL	2011-10-08	-31.2961	29.9925	84	2804	612.252	14.8139	3	2	137
64W15	SAT64EL	EL	2011-10-08	-31.2985	30.0044	55	2817	952.99	-20.2681	3	2	138
64W15	SAT64EL	EL	2011-10-08	-31.2965	29.9703	36	2802	1747.94	48.4309	3	2	139
64W16	SAT64EL	EL	2011-10-13	-31.2959	29.9615	36	3017	2.04451	-77.8773	2	1	140
64W16	SAT64EL	EL	2011-10-13	-31.2958	29.962	36	3015	2.60485	-31.981	2	1	141
64W16	SAT64EL	EL	2011-10-12	-31.2955	29.9608	36	3002	5.29923	18.5746	2	1	142
64W16	SAT64EL	EL	2011-10-12	-31.2955	29.9608	36	3003	5.32318	-1.69056	2	1	143
64W16	SAT64EL	EL	2011-10-13	-31.2958	29.962	36	3019	6.01328	101.427	2	1	144
64W16	SAT64EL	EL	2011-10-12	-31.2943	29.9596	36	3006	7.18225	12.8187	2	1	145
64W16	SAT64EL	EL	2011-10-12	-31.2943	29.9595	36	3007	8.63827	-82.3013	2	1	146
64W16	SAT64EL	EL	2011-10-12	-31.2954	29.9609	36	3001	8.74894	141.65	2	1	147
64W16	SAT64EL	EL	2011-10-12	-31.2944	29.9595	36	3008	10.6212	17.4168	2	1	148
64W16	SAT64EL	EL	2011-10-13	-31.2961	29.962	36	3014	28.6119	-90.723	2	1	149
64W16	SAT64EL	EL	2011-10-13	-31.2958	29.9619	36	3016	47.5355	-59.7442	2	1	150
64W16	SAT64EL	EL	2011-10-13	-31.2959	29.9615	36	3018	50.9977	-101.426	2	1	151
64W16	SAT64EL	EL	2011-10-13	-31.2962	29.9614	36	3013	59.4038	-138.108	2	1	152
64W16	SAT64EL	EL	2011-10-12	-31.2944	29.9604	36	3005	86.129	-72.5647	2	1	153
64W16	SAT64EL	EL	2011-10-12	-31.2958	29.96	36	3000	100.104	-999	2	1	154
64W16	SAT64EL	EL	2011-10-12	-31.2956	29.9608	36	3004	149.211	125.473	2	1	155
64W16	SAT64EL	EL	2011-10-13	-31.2948	29.9627	36	3012	202.204	9.86303	2	1	156
64W16	SAT64EL	EL	2011-10-12	-31.2923	29.962	36	3010	250.343	39.9291	2	1	157
64W16	SAT64EL	EL	2011-10-12	-31.2921	29.9644	36	3011	374.268	123.174	2	1	158
64W16	SAT64EL	EL	2011-10-12	-31.2945	29.9594	36	3009	374.371	-175.185	2	1	159
64W17	SAT64EL	EL	2011-10-17	-31.2308	29.9642	31	3211	1.75719	-71.1371	2	1	160
64W17	SAT64EL	EL	2011-10-17	-31.2301	29.9635	31	3205	2.04477	76.0298	2	1	161
64W17	SAT64EL	EL	2011-10-17	-31.2301	29.9636	31	3207	3.96926	90.001	2	1	162
64W17	SAT64EL	EL	2011-10-17	-31.2301	29.9635	31	3206	6.92542	-90.001	2	1	163
64W17	SAT64EL	EL	2011-10-17	-31.2309	29.9642	31	3210	10.5499	-50.2313	2	1	164
64W17	SAT64EL	EL	2011-10-17	-31.231	29.9642	31	3209	16.4819	-116.906	2	1	165
64W17	SAT64EL	EL	2011-10-17	-31.2292	29.9596	31	3203	16.6301	-29.9845	2	1	166
64W17	SAT64EL	EL	2011-10-16	-31.2292	29.9638	31	3200	27.6743	-999	2	1	167
64W17	SAT64EL	EL	2011-10-17	-31.2293	29.9596	31	3217	33.0631	35.0447	2	1	168
64W17	SAT64EL	EL	2011-10-16	-31.2292	29.9636	31	3201	99.2185	-35.9001	2	1	169
64W17	SAT64EL	EL	2011-10-17	-31.2301	29.9636	31	3208	117.936	-31.7261	2	1	170
64W17	SAT64EL	EL	2011-10-17	-31.2308	29.9642	31	3212	162.96	-85.1595	2	1	171
64W17	SAT64EL	EL	2011-10-17	-31.2286	29.9579	31	3215	213.778	56.4689	2	1	172
64W17	SAT64EL	EL	2011-10-17	-31.2328	29.9587	31	3219	246.783	165.351	2	1	173
64W17	SAT64EL	EL	2011-10-17	-31.2272	29.9592	31	3216	264.936	132.341	2	1	174
64W17	SAT64EL	EL	2011-10-16	-31.2296	29.9627	31	3202	327.681	40.4446	2	1	175
64W17	SAT64EL	EL	2011-10-17	-31.2296	29.9595	31	3218	398.038	-12.3199	2	1	176
64W17	SAT64EL	EL	2011-10-17	-31.2292	29.9595	31	3204	431.386	-144.826	2	1	177
64W17	SAT64EL	EL	2011-10-17	-31.2323	29.9594	31	3214	469.439	72.863	2	1	178
64W17	SAT64EL	EL	2011-10-17	-31.2321	29.9641	31	3213	480.966	83.0088	2	1	179
64W18	SAT64EL	EL	2011-10-21	-31.2324	29.9735	31	3408	1.9246	-59.0102	2	1	180
64W18	SAT64EL	EL	2011-10-21	-31.2449	29.9756	31	3400	2.53741	-999	2	1	181
64W18	SAT64EL	EL	2011-10-21	-31.2332	29.9734	31	3411	4.06605	24.96	2	1	182
64W18	SAT64EL	EL	2011-10-21	-31.2449	29.9756	31	3401	5.23341	180	2	1	183
64W18	SAT64EL	EL	2011-10-21	-31.2382	29.9701	31	3417	17.0565	145.794	2	1	184
64W18	SAT64EL	EL	2011-10-21	-31.2332	29.9736	31	3410	22.4206	104.569	2	1	185
64W18	SAT64EL	EL	2011-10-21	-31.2381	29.9702	31	3418	24.3179	160	2	1	186
64W18	SAT64EL	EL	2011-10-21	-31.2448	29.9755	31	3402	53.9724	82.755	2	1	187
64W18	SAT64EL	EL	2011-10-21	-31.2324	29.9735	31	3409	95.571	-9.33652	2	1	188
64W18	SAT64EL	EL	2011-10-21	-31.2383	29.9701	31	3419	182.368	169.623	2	1	189
64W18	SAT64EL	EL	2011-10-21	-31.2316	29.975	31	3407	186.901	-166.8	2	1	190
64W18	SAT64EL	EL	2011-10-21	-31.2345	29.9688	31	3413	208.531	-8.54648	2	1	191
64W18	SAT64EL	EL	2011-10-21	-31.2381	29.9703	31	3415	245.009	-51.5429	2	1	192
64W18	SAT64EL	EL	2011-10-21	-31.2378	29.9726	31	3416	271.649	176.892	2	1	193
64W18	SAT64EL	EL	2011-10-21	-31.2445	29.9759	31	3403	313.029	-69.9809	2	1	194
64W18	SAT64EL	EL	2011-10-21	-31.2422	29.9745	31	3404	328.659	0.094414	2	1	195
64W18	SAT64EL	EL	2011-10-21	-31.2337	29.9725	31	3406	365.16	49.8594	2	1	196
64W18	SAT64EL	EL	2011-10-21	-31.2353	29.967	31	3414	479.004	-109.137	2	1	197
64W18	SAT64EL	EL	2011-10-21	-31.2332	29.9734	31	3412	504.412	-48.4983	2	1	198
64W18	SAT64EL	EL	2011-10-21	-31.2398	29.973	31	3405	731.601	23.7461	2	1	199
64W19	SAT64EL	EL	2011-10-25	-31.2976	29.9717	36	3610	9.16776	146.363	2	1	200
64W19	SAT64EL	EL	2011-10-25	-31.2965	29.9707	36	3608	76.6831	114.971	2	1	201
64W19	SAT64EL	EL	2011-10-25	-31.3047	29.9689	36	3604	77.8597	20.0001	2	1	202
64W19	SAT64EL	EL	2011-10-25	-31.2968	29.9714	36	3609	104.028	51.5437	2	1	203
64W19	SAT64EL	EL	2011-10-25	-31.3004	29.9687	36	3612	141.846	37.6065	2	1	204
64W19	SAT64EL	EL	2011-10-25	-31.2975	29.9627	36	3615	143.412	177.839	2	1	205
64W19	SAT64EL	EL	2011-10-25	-31.3048	29.9697	36	3605	152.326	-19.5525	2	1	206
64W19	SAT64EL	EL	2011-10-25	-31.3051	29.9673	36	3603	172.214	114.794	2	1	207
64W19	SAT64EL	EL	2011-10-25	-31.2991	29.962	36	3614	203.029	90.9019	2	1	208
64W19	SAT64EL	EL	2011-10-25	-31.3097	29.9746	36	3600	285.588	-999	2	1	209
64W19	SAT64EL	EL	2011-10-25	-31.3022	29.9577	36	3618	308.712	55.2609	2	1	210
64W19	SAT64EL	EL	2011-10-25	-31.2996	29.9709	36	3607	367.027	0.449747	2	1	211
64W19	SAT64EL	EL	2011-10-25	-31.3076	29.9697	36	3602	394.31	55.3213	2	1	212
64W19	SAT64EL	EL	2011-10-25	-31.2976	29.9716	36	3611	462.315	-89.2018	2	1	213
64W19	SAT64EL	EL	2011-10-25	-31.3073	29.9744	36	3601	484.96	-89.4158	2	1	214
64W19	SAT64EL	EL	2011-10-25	-31.2997	29.9576	36	3619	512.772	35.2421	2	1	215
64W19	SAT64EL	EL	2011-10-25	-31.3046	29.962	36	3617	528.137	120.542	2	1	216
64W19	SAT64EL	EL	2011-10-25	-31.3007	29.9673	36	3613	578.54	30.0271	2	1	217
64W19	SAT64EL	EL	2011-10-25	-31.3045	29.9711	36	3606	589.818	-78.6362	2	1	218
64W19	SAT64EL	EL	2011-10-25	-31.2986	29.9623	36	3616	726.294	-15.5843	2	1	219
64W2	SAT64EL	EL	2011-08-15	-31.2924	29.9921	3	202	1.75614	-37.5435	3	2	220
64W2	SAT64EL	EL	2011-08-15	-31.2924	29.9921	3	203	3.40898	180	3	2	221
64W2	SAT64EL	EL	2011-08-15	-31.2924	29.9921	3	201	6.5142	168.199	3	2	222
64W2	SAT64EL	EL	2011-08-15	-31.2924	29.9921	3	200	7.92784	-999	3	2	223
64W2	SAT64EL	EL	2011-08-15	-31.3038	29.995	84	212	8.81359	7.79987	3	2	224
64W2	SAT64EL	EL	2011-08-15	-31.3037	29.9951	84	213	29.3515	-14.9689	3	2	225
64W2	SAT64EL	EL	2011-08-15	-31.3039	29.9947	84	211	33.2399	-120.363	3	2	226
64W2	SAT64EL	EL	2011-08-15	-31.3026	29.9957	84	215	52.5427	158.12	3	2	227
64W2	SAT64EL	EL	2011-08-15	-31.3031	29.9947	84	217	65.9517	70.1682	3	2	228
64W2	SAT64EL	EL	2011-08-15	-31.302	29.9956	84	209	80.6655	-107.344	3	2	229
64W2	SAT64EL	EL	2011-08-15	-31.303	29.9958	84	216	113.122	89.3754	3	2	230
64W2	SAT64EL	EL	2011-08-15	-31.3036	29.9954	84	214	132.459	-47.3027	3	2	231
64W2	SAT64EL	EL	2011-08-15	-31.2974	29.9921	84	206	159.916	28.4053	3	2	232
64W2	SAT64EL	EL	2011-08-15	-31.3026	29.9944	84	218	179.942	11.3445	3	2	233
64W2	SAT64EL	EL	2011-08-15	-31.3012	29.9939	84	219	220.674	-32.4709	3	2	234
64W2	SAT64EL	EL	2011-08-15	-31.3025	29.9934	84	208	233.469	-78.6796	3	2	235
64W2	SAT64EL	EL	2011-08-15	-31.3014	29.9952	84	210	292.411	-138.579	3	2	236
64W2	SAT64EL	EL	2011-08-15	-31.2924	29.9921	3	204	295.745	-108.321	3	2	237
64W2	SAT64EL	EL	2011-08-15	-31.2948	29.993	55	205	331.586	34.3086	3	2	238
64W2	SAT64EL	EL	2011-08-15	-31.2984	29.9911	84	207	556.573	-70.6366	3	2	239
64W20	SAT64EL	EL	2011-10-29	-31.3075	29.956	36	3816	3.40759	-37.8472	2	1	240
64W20	SAT64EL	EL	2011-10-29	-31.3075	29.956	36	3817	3.51085	-2.05081e-05	2	1	241
64W20	SAT64EL	EL	2011-10-29	-31.3075	29.9559	36	3818	4.00357	151.275	2	1	242
64W20	SAT64EL	EL	2011-10-29	-31.3019	29.9598	36	3803	5.16349	77.0875	2	1	243
64W20	SAT64EL	EL	2011-10-29	-31.3019	29.9599	36	3804	6.81581	180	2	1	244
64W20	SAT64EL	EL	2011-10-29	-31.3	29.957	36	3810	93.1375	31.9059	2	1	245
64W20	SAT64EL	EL	2011-10-29	-31.3042	29.9603	36	3806	151.511	-175.587	2	1	246
64W20	SAT64EL	EL	2011-10-29	-31.3072	29.9574	36	3800	161.401	-999	2	1	247
64W20	SAT64EL	EL	2011-10-29	-31.3084	29.9574	36	3815	183.07	-28.6892	2	1	248
64W20	SAT64EL	EL	2011-10-29	-31.3075	29.956	36	3819	184.925	109.083	2	1	249
64W20	SAT64EL	EL	2011-10-29	-31.3109	29.9586	55	3813	258.068	9.20567	2	1	250
64W20	SAT64EL	EL	2011-10-29	-31.3019	29.9598	36	3805	274.246	-101.576	2	1	251
64W20	SAT64EL	EL	2011-10-29	-31.3029	29.9602	36	3807	298.319	-29.7246	2	1	252
64W20	SAT64EL	EL	2011-10-29	-31.3009	29.9584	36	3808	331.427	59.1726	2	1	253
64W20	SAT64EL	EL	2011-10-29	-31.2984	29.9596	36	3809	340.809	-147.895	2	1	254
64W20	SAT64EL	EL	2011-10-29	-31.3051	29.959	36	3802	392.848	-0.401972	2	1	255
64W20	SAT64EL	EL	2011-10-29	-31.3084	29.9581	36	3801	403.619	-140.082	2	1	256
64W20	SAT64EL	EL	2011-10-29	-31.3129	29.9596	55	3814	583.409	-177.79	2	1	257
64W20	SAT64EL	EL	2011-10-29	-31.3001	29.9561	36	3811	716.808	-72.9704	2	1	258
64W20	SAT64EL	EL	2011-10-29	-31.3059	29.9545	36	3812	740.304	-48.2049	2	1	259
64W21	SAT64EL	EL	2011-11-03	-31.3068	29.9656	36	4019	0	-999	1	2	260
64W21	SAT64EL	EL	2011-11-03	-31.3068	29.9656	36	4018	6.01329	78.8022	1	2	261
64W21	SAT64EL	EL	2011-11-02	-31.3068	29.9655	36	4017	10.5271	-2.62939	1	2	262
64W21	SAT64EL	EL	2011-11-02	-31.2913	29.9771	84	4000	15.5742	-999	1	2	263
64W21	SAT64EL	EL	2011-11-02	-31.3069	29.9663	36	4011	31.704	-141.994	1	2	264
64W21	SAT64EL	EL	2011-11-02	-31.3073	29.9666	36	4009	33.3733	-67.658	1	2	265
64W21	SAT64EL	EL	2011-11-02	-31.3067	29.9651	36	4016	33.7127	102.231	1	2	266
64W21	SAT64EL	EL	2011-11-02	-31.3072	29.9663	36	4010	38.0447	63.7712	1	2	267
64W21	SAT64EL	EL	2011-11-02	-31.3071	29.9661	36	4012	82.3993	11.9627	1	2	268
64W21	SAT64EL	EL	2011-11-02	-31.3077	29.9651	36	4015	122.358	17.1609	1	2	269
64W21	SAT64EL	EL	2011-11-02	-31.2985	29.9737	36	4003	153.589	153.689	1	2	270
64W21	SAT64EL	EL	2011-11-02	-31.3089	29.9655	36	4014	153.932	165.011	1	2	271
64W21	SAT64EL	EL	2011-11-02	-31.3075	29.9655	36	4013	174.394	-53.1902	1	2	272
64W21	SAT64EL	EL	2011-11-02	-31.3088	29.9664	36	4008	181.578	176.082	1	2	273
64W21	SAT64EL	EL	2011-11-02	-31.3033	29.9654	36	4006	290.925	130.924	1	2	274
64W21	SAT64EL	EL	2011-11-02	-31.3059	29.9648	36	4005	319.821	142.716	1	2	275
64W21	SAT64EL	EL	2011-11-02	-31.2985	29.9768	84	4002	326.997	87.8036	1	2	276
64W21	SAT64EL	EL	2011-11-02	-31.3052	29.9672	36	4007	446.379	49.2981	1	2	277
64W21	SAT64EL	EL	2011-11-02	-31.2914	29.9772	84	4001	854.593	28.5802	1	2	278
64W21	SAT64EL	EL	2011-11-02	-31.2979	29.975	36	4004	1421.51	163.822	1	2	279
64W22	SAT64EL	EL	2011-11-07	-31.2925	30.0099	84	4212	1.65302	173.2	2	1	280
64W22	SAT64EL	EL	2011-11-07	-31.2925	30.0099	84	4215	2.6958	64.5203	2	1	281
64W22	SAT64EL	EL	2011-11-07	-31.2925	30.0099	84	4213	3.40935	180	2	1	282
64W22	SAT64EL	EL	2011-11-07	-31.2925	30.0099	84	4214	4.34107	66.1359	2	1	283
64W22	SAT64EL	EL	2011-11-06	-31.2992	30.0007	84	4202	6.23765	105.366	2	1	284
64W22	SAT64EL	EL	2011-11-06	-31.2977	30.0025	84	4207	6.51444	51.1068	2	1	285
64W22	SAT64EL	EL	2011-11-06	-31.2992	30.0007	84	4201	6.81775	-53.0802	2	1	286
64W22	SAT64EL	EL	2011-11-07	-31.2925	30.0101	84	4211	17.2715	-79.343	2	1	287
64W22	SAT64EL	EL	2011-11-07	-31.293	30.0101	55	4210	52.2088	-30.727	2	1	288
64W22	SAT64EL	EL	2011-11-06	-31.2991	30.0007	84	4203	53.7708	119.802	2	1	289
64W22	SAT64EL	EL	2011-11-06	-31.2995	30.0011	84	4200	60.1862	-999	2	1	290
64W22	SAT64EL	EL	2011-11-06	-31.2983	30.0025	84	4206	70.2716	-33.4226	2	1	291
64W22	SAT64EL	EL	2011-11-07	-31.2924	30.0099	84	4216	110.254	-131.719	2	1	292
64W22	SAT64EL	EL	2011-11-07	-31.294	30.0095	55	4209	137.154	-31.045	2	1	293
64W22	SAT64EL	EL	2011-11-07	-31.2897	30.005	55	4219	212.64	154.723	2	1	294
64W22	SAT64EL	EL	2011-11-06	-31.2994	30.001	84	4204	218.013	66.6105	2	1	295
64W22	SAT64EL	EL	2011-11-07	-31.2914	30.0063	84	4218	241.587	28.0655	2	1	296
64W22	SAT64EL	EL	2011-11-07	-31.2925	30.0088	84	4217	294.173	28.2416	2	1	297
64W22	SAT64EL	EL	2011-11-06	-31.3011	30.0003	84	4205	407.552	-167.006	2	1	298
64W22	SAT64EL	EL	2011-11-07	-31.2977	30.0026	84	4208	845.462	5.46208	2	1	299
64W23	SAT64EL	EL	2011-11-11	-31.2941	29.9573	84	4416	4.08892	79.8446	3	2	300
64W23	SAT64EL	EL	2011-11-11	-31.2855	29.9597	84	4404	5.51141	0.0787547	3	2	301
64W23	SAT64EL	EL	2011-11-11	-31.2942	29.9573	84	4417	5.55393	-111.6	3	2	302
64W23	SAT64EL	EL	2011-11-11	-31.2941	29.9573	84	4418	7.1164	-175.097	3	2	303
64W23	SAT64EL	EL	2011-11-11	-31.2855	29.9597	84	4401	13.841	-72.5217	3	2	304
64W23	SAT64EL	EL	2011-11-11	-31.2855	29.9595	84	4402	28.9643	-33.807	3	2	305
64W23	SAT64EL	EL	2011-11-11	-31.2943	29.9567	84	4414	30.8514	-43.4398	3	2	306
64W23	SAT64EL	EL	2011-11-11	-31.2857	29.9593	84	4403	45.9886	-166.706	3	2	307
64W23	SAT64EL	EL	2011-11-11	-31.294	29.9566	84	4415	68.1993	113.117	3	2	308
64W23	SAT64EL	EL	2011-11-11	-31.2855	29.9598	84	4405	88.3062	113.789	3	2	309
64W23	SAT64EL	EL	2011-11-11	-31.2862	29.9597	84	4406	115.991	-33.6187	3	2	310
64W23	SAT64EL	EL	2011-11-11	-31.2871	29.9603	84	4407	131.895	-163.322	3	2	311
64W23	SAT64EL	EL	2011-11-11	-31.2942	29.9573	84	4419	181.582	33.3998	3	2	312
64W23	SAT64EL	EL	2011-11-11	-31.287	29.9602	84	4400	189.132	-999	3	2	313
64W23	SAT64EL	EL	2011-11-11	-31.286	29.96	84	4408	198.685	171.703	3	2	314
64W23	SAT64EL	EL	2011-11-11	-31.2875	29.9607	84	4409	379.239	-95.8399	3	2	315
64W23	SAT64EL	EL	2011-11-11	-31.2945	29.9566	84	4412	466.978	0.42138	3	2	316
64W23	SAT64EL	EL	2011-11-11	-31.2978	29.9543	32	4413	495.383	178.675	3	2	317
64W23	SAT64EL	EL	2011-11-11	-31.2861	29.964	84	4410	519.325	161.843	3	2	318
64W23	SAT64EL	EL	2011-11-11	-31.2892	29.9605	84	4411	753.672	-12.735	3	2	319
64W24	SAT64EL	EL	2011-11-15	-31.3012	30.0004	84	4617	3.51208	-113.951	2	1	320
64W24	SAT64EL	EL	2011-11-15	-31.3032	29.9856	84	4608	11.1087	77.8099	2	1	321
64W24	SAT64EL	EL	2011-11-15	-31.3031	29.9857	84	4609	14.3327	-174.978	2	1	322
64W24	SAT64EL	EL	2011-11-15	-31.3011	29.9907	84	4605	32.1162	140.043	2	1	323
64W24	SAT64EL	EL	2011-11-15	-31.3012	30.0004	84	4618	66.6981	138.555	2	1	324
64W24	SAT64EL	EL	2011-11-15	-31.3008	30.0009	84	4619	72.1323	-174.265	2	1	325
64W24	SAT64EL	EL	2011-11-15	-31.3018	29.9891	84	4603	91.6409	97.3786	2	1	326
64W24	SAT64EL	EL	2011-11-15	-31.3032	29.9855	84	4610	212.894	146.873	2	1	327
64W24	SAT64EL	EL	2011-11-15	-31.3031	29.9854	84	4612	215.052	167.609	2	1	328
64W24	SAT64EL	EL	2011-11-15	-31.3026	29.9894	84	4604	219.696	-120.279	2	1	329
64W24	SAT64EL	EL	2011-11-15	-31.3018	29.9869	84	4611	222.535	-174.935	2	1	330
64W24	SAT64EL	EL	2011-11-15	-31.3016	29.9865	84	4613	326.071	123.372	2	1	331
64W24	SAT64EL	EL	2011-11-15	-31.3059	29.9861	84	4607	337.237	129.313	2	1	332
64W24	SAT64EL	EL	2011-11-15	-31.3032	29.986	84	4602	355.976	-49.0736	2	1	333
64W24	SAT64EL	EL	2011-11-15	-31.2987	29.9801	84	4600	429.908	-999	2	1	334
64W24	SAT64EL	EL	2011-11-15	-31.3018	29.9821	84	4601	439.813	-39.8606	2	1	335
64W24	SAT64EL	EL	2011-11-15	-31.3046	29.9987	55	4616	449.631	-52.962	2	1	336
64W24	SAT64EL	EL	2011-11-15	-31.3041	29.9877	84	4614	507.973	-41.6025	2	1	337
64W24	SAT64EL	EL	2011-11-15	-31.3059	29.9922	84	4615	682.169	-37.8168	2	1	338
64W24	SAT64EL	EL	2011-11-15	-31.3014	29.9907	84	4606	722.759	41.2726	2	1	339
64W25	SAT64EL	EL	2011-11-19	-31.3009	29.9789	84	4807	14.9901	-15.1153	2	1	340
64W25	SAT64EL	EL	2011-11-19	-31.3001	29.9798	84	4805	27.4262	6.84792	2	1	341
64W25	SAT64EL	EL	2011-11-19	-31.3096	29.9874	84	4818	55.0707	23.9568	2	1	342
64W25	SAT64EL	EL	2011-11-19	-31.2985	29.9755	84	4800	67.9155	-999	2	1	343
64W25	SAT64EL	EL	2011-11-19	-31.308	29.9914	55	4813	99.7422	-20.6165	2	1	344
64W25	SAT64EL	EL	2011-11-19	-31.3041	29.9869	84	4811	117.762	27.2193	2	1	345
64W25	SAT64EL	EL	2011-11-19	-31.304	29.9857	84	4810	123.926	-29.5725	2	1	346
64W25	SAT64EL	EL	2011-11-19	-31.3	29.9796	84	4806	125.218	-95.8665	2	1	347
64W25	SAT64EL	EL	2011-11-19	-31.3097	29.9901	55	4815	176.791	21.255	2	1	348
64W25	SAT64EL	EL	2011-11-19	-31.3113	29.9862	84	4817	230.391	154.559	2	1	349
64W25	SAT64EL	EL	2011-11-19	-31.2982	29.976	84	4801	241.459	30.6618	2	1	350
64W25	SAT64EL	EL	2011-11-19	-31.31	29.9884	55	4816	272.062	-20.9019	2	1	351
64W25	SAT64EL	EL	2011-11-19	-31.3084	29.9923	55	4814	273.222	119.34	2	1	352
64W25	SAT64EL	EL	2011-11-19	-31.2996	29.9814	84	4803	283.632	34.4739	2	1	353
64W25	SAT64EL	EL	2011-11-19	-31.3017	29.9825	84	4804	341.634	147.511	2	1	354
64W25	SAT64EL	EL	2011-11-19	-31.3094	29.9878	84	4819	355.888	178.462	2	1	355
64W25	SAT64EL	EL	2011-11-19	-31.2979	29.9783	84	4802	378.808	39.9469	2	1	356
64W25	SAT64EL	EL	2011-11-19	-31.3019	29.9827	84	4809	395.894	23.4185	2	1	357
64W25	SAT64EL	EL	2011-11-19	-31.301	29.9789	84	4808	412.621	-94.6647	2	1	358
64W25	SAT64EL	EL	2011-11-19	-31.3047	29.9878	84	4812	549.174	10.3432	2	1	359
64W26	SAT64EL	EL	2011-11-23	-31.2751	30.0171	17	5015	0	-999	3	2	360
64W26	SAT64EL	EL	2011-11-23	-31.2753	30.0189	17	5011	3.97661	50.994	3	2	361
64W26	SAT64EL	EL	2011-11-23	-31.2751	30.017	17	5014	9.47369	93.2702	3	2	362
64W26	SAT64EL	EL	2011-11-23	-31.2757	30.0226	55	5005	17.5459	1.73142	3	2	363
64W26	SAT64EL	EL	2011-11-23	-31.2772	30.0207	55	5007	72.458	88.6509	3	2	364
64W26	SAT64EL	EL	2011-11-23	-31.2789	30.0188	55	5009	78.4948	15.729	3	2	365
64W26	SAT64EL	EL	2011-11-23	-31.2753	30.0189	17	5012	104.869	-166.885	3	2	366
64W26	SAT64EL	EL	2011-11-23	-31.2756	30.018	17	5013	113.113	47.6197	3	2	367
64W26	SAT64EL	EL	2011-11-23	-31.2747	30.0221	17	5004	130.466	46.9299	3	2	368
64W26	SAT64EL	EL	2011-11-23	-31.2737	30.0182	17	5017	152.576	101.71	3	2	369
64W26	SAT64EL	EL	2011-11-23	-31.2751	30.0171	17	5016	195.01	-999	3	2	370
64W26	SAT64EL	EL	2011-11-23	-31.2752	30.0121	34	5000	218.712	-999	3	2	371
64W26	SAT64EL	EL	2011-11-23	-31.2773	30.0208	55	5019	250.221	-79.7524	3	2	372
64W26	SAT64EL	EL	2011-11-23	-31.2758	30.0227	55	5006	266.545	72.938	3	2	373
64W26	SAT64EL	EL	2011-11-23	-31.2688	30.0099	34	5002	286.826	-133.918	3	2	374
64W26	SAT64EL	EL	2011-11-23	-31.2768	30.0203	55	5008	300.714	-107.686	3	2	375
64W26	SAT64EL	EL	2011-11-23	-31.2747	30.0192	17	5018	364.975	14.1766	3	2	376
64W26	SAT64EL	EL	2011-11-23	-31.2794	30.0182	55	5010	492.111	141.66	3	2	377
64W26	SAT64EL	EL	2011-11-23	-31.2736	30.0114	34	5001	590.567	5.36878	3	2	378
64W26	SAT64EL	EL	2011-11-23	-31.2709	30.0084	34	5003	1484.08	-102.593	3	2	379
64W27	SAT64EL	EL	2011-11-27	-31.2496	29.9975	34	5205	0	-999	2	1	380
64W27	SAT64EL	EL	2011-11-28	-31.2486	30.003	17	5215	0	-999	2	1	381
64W27	SAT64EL	EL	2011-11-27	-31.2496	29.9975	34	5206	3.97707	-999	2	1	382
64W27	SAT64EL	EL	2011-11-28	-31.2488	30.0029	17	5219	12.0937	-180	2	1	383
64W27	SAT64EL	EL	2011-11-27	-31.2486	30.0028	34	5211	12.5047	-31.3991	2	1	384
64W27	SAT64EL	EL	2011-11-28	-31.2487	30.0029	34	5214	13.108	-176.758	2	1	385
64W27	SAT64EL	EL	2011-11-27	-31.2496	29.9974	34	5204	14.3088	-21.9183	2	1	386
64W27	SAT64EL	EL	2011-11-28	-31.2486	30.003	17	5213	18.2685	-178.955	2	1	387
64W27	SAT64EL	EL	2011-11-27	-31.2496	29.9972	34	5203	19.0127	-55.9547	2	1	388
64W27	SAT64EL	EL	2011-11-28	-31.2487	30.0028	34	5212	20.9412	-116.405	2	1	389
64W27	SAT64EL	EL	2011-11-28	-31.2487	30.0026	34	5217	29.2523	-3.64401	2	1	390
64W27	SAT64EL	EL	2011-11-28	-31.2486	30.003	17	5216	35.9729	-999	2	1	391
64W27	SAT64EL	EL	2011-11-27	-31.2492	29.9969	34	5202	54.6191	-164.792	2	1	392
64W27	SAT64EL	EL	2011-11-28	-31.2488	30.0024	34	5218	55.0936	-160.041	2	1	393
64W27	SAT64EL	EL	2011-11-27	-31.2505	29.9983	34	5201	215.397	108.344	2	1	394
64W27	SAT64EL	EL	2011-11-27	-31.2409	30.0024	34	5209	294.213	69.4495	2	1	395
64W27	SAT64EL	EL	2011-11-27	-31.2445	30.0004	34	5208	470.927	-0.0891231	2	1	396
64W27	SAT64EL	EL	2011-11-27	-31.2464	30.0009	34	5200	557.558	-999	2	1	397
64W27	SAT64EL	EL	2011-11-27	-31.2496	29.9975	34	5207	692.373	147.077	2	1	398
64W27	SAT64EL	EL	2011-11-27	-31.2412	30.0052	34	5210	930.436	100.082	2	1	399
64W28	SAT64EL	EL	2011-12-02	-31.2538	30.0401	34	5412	3.91742	-179.613	1	1	400
64W28	SAT64EL	EL	2011-12-02	-31.2538	30.04	34	5410	5.16912	31.2717	1	1	401
64W28	SAT64EL	EL	2011-12-02	-31.2534	30.0408	34	5407	6.5183	58.8335	1	1	402
64W28	SAT64EL	EL	2011-12-02	-31.2538	30.04	34	5411	7.98421	150.175	1	1	403
64W28	SAT64EL	EL	2011-12-02	-31.2533	30.0407	34	5408	12.536	-143.815	1	1	404
64W28	SAT64EL	EL	2011-12-02	-31.2532	30.0411	55	5405	21.1675	-170.562	1	1	405
64W28	SAT64EL	EL	2011-12-02	-31.2533	30.041	55	5406	22.1931	27.8178	1	1	406
64W28	SAT64EL	EL	2011-12-01	-31.2576	30.0404	55	5401	24.8572	46.6421	1	1	407
64W28	SAT64EL	EL	2011-12-01	-31.2558	30.0391	34	5403	27.6272	82.3587	1	1	408
64W28	SAT64EL	EL	2011-12-02	-31.2538	30.04	34	5413	38.3797	60.8003	1	1	409
64W28	SAT64EL	EL	2011-12-02	-31.2531	30.0366	34	5416	84.3189	23.3514	1	1	410
64W28	SAT64EL	EL	2011-12-02	-31.2534	30.0408	34	5409	88.7828	75.0107	1	1	411
64W28	SAT64EL	EL	2011-12-01	-31.2575	30.0413	55	5400	93.5879	-999	1	1	412
64W28	SAT64EL	EL	2011-12-01	-31.2574	30.0402	55	5402	227.187	21.4909	1	1	413
64W28	SAT64EL	EL	2011-12-02	-31.248	30.035	34	5419	256.554	-68.3645	1	1	414
64W28	SAT64EL	EL	2011-12-02	-31.2499	30.0365	34	5418	278.187	-42.6191	1	1	415
64W28	SAT64EL	EL	2011-12-01	-31.2556	30.0393	34	5404	350.206	-22.8507	1	1	416
64W28	SAT64EL	EL	2011-12-02	-31.2535	30.0359	34	5417	439.266	131.019	1	1	417
64W28	SAT64EL	EL	2011-12-02	-31.2536	30.0397	34	5414	642.808	64.1747	1	1	418
64W28	SAT64EL	EL	2011-12-02	-31.2483	30.0403	29	5415	692.78	-152.023	1	1	419
64W29	SAT64EL	EL	2011-12-06	-31.3095	29.9865	84	5604	0	-999	1	2	420
64W29	SAT64EL	EL	2011-12-06	-31.3095	29.9865	84	5603	3.51141	131.497	1	2	421
64W29	SAT64EL	EL	2011-12-06	-31.3095	29.9865	84	5602	5.29949	-74.1483	1	2	422
64W29	SAT64EL	EL	2011-12-06	-31.3094	29.9865	84	5601	9.57137	122.651	1	2	423
64W29	SAT64EL	EL	2011-12-06	-31.3094	29.9862	84	5600	32.6355	-999	1	2	424
64W29	SAT64EL	EL	2011-12-06	-31.2965	29.9737	36	5616	50.5424	-66.7315	1	2	425
64W29	SAT64EL	EL	2011-12-06	-31.3095	29.9865	84	5605	52.258	-999	1	2	426
64W29	SAT64EL	EL	2011-12-06	-31.2981	29.9742	36	5610	104.879	95.7889	1	2	427
64W29	SAT64EL	EL	2011-12-06	-31.2986	29.9752	36	5609	123.691	-10.8684	1	2	428
64W29	SAT64EL	EL	2011-12-06	-31.2974	29.9747	36	5611	157.341	-177.371	1	2	429
64W29	SAT64EL	EL	2011-12-06	-31.2955	29.9751	36	5615	182.896	5.74472	1	2	430
64W29	SAT64EL	EL	2011-12-06	-31.2969	29.9739	36	5617	220.684	-113.659	1	2	431
64W29	SAT64EL	EL	2011-12-06	-31.2985	29.9738	36	5612	225.755	162.784	1	2	432
64W29	SAT64EL	EL	2011-12-06	-31.2931	29.9777	36	5614	392.778	-173.646	1	2	433
64W29	SAT64EL	EL	2011-12-06	-31.2957	29.9755	36	5618	464.602	-53.1584	1	2	434
64W29	SAT64EL	EL	2011-12-06	-31.3098	29.9861	84	5606	502.097	111.506	1	2	435
64W29	SAT64EL	EL	2011-12-06	-31.2967	29.9745	36	5613	540.625	18.573	1	2	436
64W29	SAT64EL	EL	2011-12-06	-31.3017	29.9798	84	5608	597.547	-10.4042	1	2	437
64W29	SAT64EL	EL	2011-12-06	-31.2918	29.9751	36	5619	644.808	-120.01	1	2	438
64W29	SAT64EL	EL	2011-12-06	-31.306	29.9843	84	5607	692.994	-19.5688	1	2	439
64W3	SAT64EL	EL	2011-08-19	-31.2648	30.0093	34	400	1.75693	-999	3	2	440
64W3	SAT64EL	EL	2011-08-19	-31.2807	30.0108	27	409	1.92487	-119.444	3	2	441
64W3	SAT64EL	EL	2011-08-19	-31.2807	30.0107	27	408	3.91562	71.0858	3	2	442
64W3	SAT64EL	EL	2011-08-19	-31.3019	29.9877	84	418	34.35	173.807	3	2	443
64W3	SAT64EL	EL	2011-08-19	-31.281	30.0095	27	412	36.4505	13.2291	3	2	444
64W3	SAT64EL	EL	2011-08-19	-31.2807	30.0108	27	410	54.349	-163.43	3	2	445
64W3	SAT64EL	EL	2011-08-19	-31.3018	29.9874	84	419	56.1106	108.291	3	2	446
64W3	SAT64EL	EL	2011-08-19	-31.2811	30.0101	27	407	78.3974	-163.405	3	2	447
64W3	SAT64EL	EL	2011-08-19	-31.2781	30.0141	27	404	78.429	130.596	3	2	448
64W3	SAT64EL	EL	2011-08-19	-31.2811	30.0106	27	411	114.296	79.4709	3	2	449
64W3	SAT64EL	EL	2011-08-19	-31.2769	30.0133	27	403	160.334	-45.5564	3	2	450
64W3	SAT64EL	EL	2011-08-19	-31.2797	30.0112	27	406	202.767	-16.3214	3	2	451
64W3	SAT64EL	EL	2011-08-19	-31.278	30.0134	27	405	303.278	-50.7388	3	2	452
64W3	SAT64EL	EL	2011-08-19	-31.3024	29.9834	84	416	395.119	102.878	3	2	453
64W3	SAT64EL	EL	2011-08-19	-31.2991	29.9835	84	417	551.833	125.888	3	2	454
64W3	SAT64EL	EL	2011-08-19	-31.2723	30.0146	17	402	578.131	45.5162	3	2	455
64W3	SAT64EL	EL	2011-08-19	-31.2648	30.0093	34	401	1051.36	-121.724	3	2	456
64W3	SAT64EL	EL	2011-08-19	-31.3005	29.9946	84	415	1178.05	62.6811	3	2	457
64W3	SAT64EL	EL	2011-08-19	-31.2809	30.0092	27	413	1341.83	-57.2722	3	2	458
64W3	SAT64EL	EL	2011-08-19	-31.2878	29.9989	3	414	1601.01	-35.5728	3	2	459
64W30	SAT64EL	EL	2011-12-10	-31.2972	30.0035	84	5809	1.75616	8.46593	1	1	460
64W30	SAT64EL	EL	2011-12-10	-31.2996	29.997	84	5817	4.34062	36.3487	1	1	461
64W30	SAT64EL	EL	2011-12-10	-31.2945	30.0046	84	5802	8.24899	174.582	1	1	462
64W30	SAT64EL	EL	2011-12-10	-31.2971	30.0037	84	5808	13.8908	105.362	1	1	463
64W30	SAT64EL	EL	2011-12-10	-31.2944	30.0045	84	5803	18.2586	-139.698	1	1	464
64W30	SAT64EL	EL	2011-12-10	-31.2946	30.0045	84	5804	33.6973	48.3616	1	1	465
64W30	SAT64EL	EL	2011-12-10	-31.2946	30.0041	84	5805	56.2957	98.3642	1	1	466
64W30	SAT64EL	EL	2011-12-10	-31.2991	29.996	84	5816	113.072	67.6208	1	1	467
64W30	SAT64EL	EL	2011-12-10	-31.3001	30.0007	84	5812	177.012	-28.606	1	1	468
64W30	SAT64EL	EL	2011-12-10	-31.2928	30.0043	84	5801	201.987	55.2739	1	1	469
64W30	SAT64EL	EL	2011-12-10	-31.2942	30.0041	84	5806	203.596	-131.5	1	1	470
64W30	SAT64EL	EL	2011-12-10	-31.2972	30.0035	84	5810	203.82	-41.967	1	1	471
64W30	SAT64EL	EL	2011-12-10	-31.2954	30.0027	84	5807	230.133	-67.064	1	1	472
64W30	SAT64EL	EL	2011-12-10	-31.3004	29.9941	84	5815	248.489	146.65	1	1	473
64W30	SAT64EL	EL	2011-12-10	-31.2919	30.0022	55	5800	253.091	-999	1	1	474
64W30	SAT64EL	EL	2011-12-10	-31.2983	30.002	84	5811	258.451	-14.9414	1	1	475
64W30	SAT64EL	EL	2011-12-10	-31.3002	29.9969	84	5814	283.273	-28.2158	1	1	476
64W30	SAT64EL	EL	2011-12-10	-31.2996	29.997	84	5818	284.444	35.385	1	1	477
64W30	SAT64EL	EL	2011-12-10	-31.3019	29.9964	84	5819	377.874	-7.33493	1	1	478
64W30	SAT64EL	EL	2011-12-10	-31.3016	30.0005	84	5813	413.66	109.245	1	1	479
64W31	SAT64EL	EL	2011-12-14	-31.2978	29.9688	36	6006	0	-999	2	1	480
64W31	SAT64EL	EL	2011-12-14	-31.2977	29.9688	36	6005	2.04459	176.148	2	1	481
64W31	SAT64EL	EL	2011-12-14	-31.3043	29.9704	36	6014	4.45011	-145.637	2	1	482
64W31	SAT64EL	EL	2011-12-14	-31.3018	29.9721	36	6019	5.55397	119.358	2	1	483
64W31	SAT64EL	EL	2011-12-14	-31.3045	29.9708	36	6013	44.8896	94.7908	2	1	484
64W31	SAT64EL	EL	2011-12-14	-31.2979	29.9742	36	6010	74.1968	98.7871	2	1	485
64W31	SAT64EL	EL	2011-12-14	-31.3039	29.9712	36	6012	92.7017	0.889012	2	1	486
64W31	SAT64EL	EL	2011-12-14	-31.3044	29.9705	36	6015	125.83	149.373	2	1	487
64W31	SAT64EL	EL	2011-12-14	-31.2978	29.9688	36	6007	129.86	-999	2	1	488
64W31	SAT64EL	EL	2011-12-14	-31.3038	29.9695	36	6016	135.143	-105.276	2	1	489
64W31	SAT64EL	EL	2011-12-14	-31.3025	29.9732	36	6018	146.265	-108.496	2	1	490
64W31	SAT64EL	EL	2011-12-14	-31.2986	29.9696	36	6008	151.945	-28.7927	2	1	491
64W31	SAT64EL	EL	2011-12-14	-31.2943	29.9591	36	6000	197.28	-999	2	1	492
64W31	SAT64EL	EL	2011-12-14	-31.3001	29.9687	36	6004	281.346	-45.999	2	1	493
64W31	SAT64EL	EL	2011-12-14	-31.3017	29.9663	36	6003	310.76	-100.762	2	1	494
64W31	SAT64EL	EL	2011-12-14	-31.2992	29.9647	36	6002	347.272	14.2064	2	1	495
64W31	SAT64EL	EL	2011-12-14	-31.2991	29.971	36	6009	355.141	-43.9203	2	1	496
64W31	SAT64EL	EL	2011-12-14	-31.3048	29.969	36	6017	507.97	-143.324	2	1	497
64W31	SAT64EL	EL	2011-12-14	-31.2954	29.9605	36	6001	636.603	3.54508	2	1	498
64W31	SAT64EL	EL	2011-12-14	-31.2985	29.9744	36	6011	715.951	40.1633	2	1	499
64W32	SAT64EL	EL	2011-12-18	-31.3081	29.9576	36	6217	0	-999	2	1	500
64W32	SAT64EL	EL	2011-12-18	-31.3081	29.9576	36	6218	0	-999	2	1	501
64W32	SAT64EL	EL	2011-12-18	-31.3081	29.9576	36	6216	3.4076	-83.7377	2	1	502
64W32	SAT64EL	EL	2011-12-18	-31.2996	29.9589	36	6203	5.51051	68.4709	2	1	503
64W32	SAT64EL	EL	2011-12-18	-31.308	29.9576	36	6215	16.0906	-131.208	2	1	504
64W32	SAT64EL	EL	2011-12-18	-31.3081	29.9578	36	6214	31.493	-77.4248	2	1	505
64W32	SAT64EL	EL	2011-12-18	-31.3002	29.9581	36	6200	76.1258	-999	2	1	506
64W32	SAT64EL	EL	2011-12-18	-31.3004	29.9589	36	6202	92.258	-140.073	2	1	507
64W32	SAT64EL	EL	2011-12-18	-31.3061	29.9597	36	6208	98.7532	-45.1889	2	1	508
64W32	SAT64EL	EL	2011-12-18	-31.3059	29.9606	36	6209	109.179	144.422	2	1	509
64W32	SAT64EL	EL	2011-12-18	-31.2996	29.9581	36	6201	123.512	141.164	2	1	510
64W32	SAT64EL	EL	2011-12-18	-31.2996	29.9589	36	6204	128.23	100.421	2	1	511
64W32	SAT64EL	EL	2011-12-18	-31.3093	29.9572	36	6213	153.844	-109.449	2	1	512
64W32	SAT64EL	EL	2011-12-18	-31.3081	29.9576	36	6219	155.359	-999	2	1	513
64W32	SAT64EL	EL	2011-12-18	-31.3051	29.9575	36	6207	262.898	-138.111	2	1	514
64W32	SAT64EL	EL	2011-12-18	-31.3045	29.9601	36	6206	281.062	89.1949	2	1	515
64W32	SAT64EL	EL	2011-12-18	-31.3066	29.96	36	6210	325.674	22.1604	2	1	516
64W32	SAT64EL	EL	2011-12-18	-31.3079	29.9572	36	6211	331.724	50.0449	2	1	517
64W32	SAT64EL	EL	2011-12-18	-31.307	29.9542	55	6212	417.882	-158.325	2	1	518
64W32	SAT64EL	EL	2011-12-18	-31.3007	29.9591	36	6205	474.028	-2.35908	2	1	519
64W33	SAT64EL	EL	2011-12-22	-31.3087	29.9881	84	6404	1.75574	46.6341	2	1	520
64W33	SAT64EL	EL	2011-12-23	-31.3086	29.9884	84	6414	2.69513	-28.18	2	1	521
64W33	SAT64EL	EL	2011-12-23	-31.3079	29.9887	84	6417	3.9141	100.355	2	1	522
64W33	SAT64EL	EL	2011-12-23	-31.3079	29.9887	84	6416	5.32359	-62.5239	2	1	523
64W33	SAT64EL	EL	2011-12-22	-31.3083	29.9886	84	6401	5.55407	-31.1821	2	1	524
64W33	SAT64EL	EL	2011-12-22	-31.3087	29.9881	84	6406	6.23702	-148.362	2	1	525
64W33	SAT64EL	EL	2011-12-22	-31.3087	29.9881	84	6405	6.26511	-106.274	2	1	526
64W33	SAT64EL	EL	2011-12-23	-31.3085	29.9883	84	6413	8.13043	-151.65	2	1	527
64W33	SAT64EL	EL	2011-12-22	-31.3083	29.9886	84	6402	9.57155	101.049	2	1	528
64W33	SAT64EL	EL	2011-12-23	-31.3086	29.9884	84	6411	15.5743	70.206	2	1	529
64W33	SAT64EL	EL	2011-12-22	-31.309	29.9868	84	6408	24.9039	30.2317	2	1	530
64W33	SAT64EL	EL	2011-12-23	-31.3087	29.9885	84	6412	26.3845	165.557	2	1	531
64W33	SAT64EL	EL	2011-12-22	-31.3087	29.989	84	6400	65.4002	-999	2	1	532
64W33	SAT64EL	EL	2011-12-22	-31.3086	29.9878	84	6410	69.2406	10.7351	2	1	533
64W33	SAT64EL	EL	2011-12-23	-31.3079	29.9887	84	6418	69.2814	-30.784	2	1	534
64W33	SAT64EL	EL	2011-12-22	-31.3082	29.9886	84	6403	82.7269	-169.286	2	1	535
64W33	SAT64EL	EL	2011-12-23	-31.3086	29.9884	84	6415	89.0619	-116.633	2	1	536
64W33	SAT64EL	EL	2011-12-22	-31.3089	29.9866	84	6409	128.089	148.708	2	1	537
64W33	SAT64EL	EL	2011-12-22	-31.3087	29.9881	84	6407	136.197	-121.623	2	1	538
64W33	SAT64EL	EL	2011-12-23	-31.3074	29.989	84	6419	182.5	13.7672	2	1	539
64W34	SAT64EL	EL	2011-12-27	-31.3091	29.976	36	6609	1.65233	59.6811	1	2	540
64W34	SAT64EL	EL	2011-12-27	-31.3095	29.9757	36	6607	2.04464	-41.4972	1	2	541
64W34	SAT64EL	EL	2011-12-26	-31.3057	29.977	84	6600	2.04467	-999	1	2	542
64W34	SAT64EL	EL	2011-12-27	-31.3094	29.9757	36	6606	5.29923	-78.7152	1	2	543
64W34	SAT64EL	EL	2011-12-27	-31.299	29.9669	36	6618	9.54005	128.453	1	2	544
64W34	SAT64EL	EL	2011-12-27	-31.3095	29.9758	36	6605	11.9503	-64.3928	1	2	545
64W34	SAT64EL	EL	2011-12-27	-31.2992	29.967	36	6617	28.8641	24.3414	1	2	546
64W34	SAT64EL	EL	2011-12-26	-31.3057	29.977	84	6601	31.7926	161.044	1	2	547
64W34	SAT64EL	EL	2011-12-27	-31.3091	29.976	36	6610	43.7667	-105.884	1	2	548
64W34	SAT64EL	EL	2011-12-27	-31.3095	29.9757	36	6608	58.1002	-149.682	1	2	549
64W34	SAT64EL	EL	2011-12-27	-31.31	29.9758	36	6604	64.3131	91.0262	1	2	550
64W34	SAT64EL	EL	2011-12-27	-31.3101	29.9764	55	6603	65.4974	85.6915	1	2	551
64W34	SAT64EL	EL	2011-12-27	-31.299	29.967	36	6619	78.1965	-154.318	1	2	552
64W34	SAT64EL	EL	2011-12-27	-31.3016	29.9699	36	6615	214.525	-59.3667	1	2	553
64W34	SAT64EL	EL	2011-12-27	-31.3053	29.9744	84	6612	397.39	-14.1977	1	2	554
64W34	SAT64EL	EL	2011-12-27	-31.3087	29.9759	36	6611	444.315	-3.5857	1	2	555
64W34	SAT64EL	EL	2011-12-26	-31.3059	29.9771	84	6602	501.962	26.8441	1	2	556
64W34	SAT64EL	EL	2011-12-27	-31.3032	29.9707	36	6616	614.882	165.426	1	2	557
64W34	SAT64EL	EL	2011-12-27	-31.3025	29.9723	36	6613	694.987	46.5433	1	2	558
64W34	SAT64EL	EL	2011-12-27	-31.2969	29.9738	36	6614	698.683	-157.156	1	2	559
64W35	SAT64EL	EL	2011-12-31	-31.2905	30.0075	84	6800	4.34104	-999	1	2	560
64W35	SAT64EL	EL	2011-12-31	-31.2905	30.0074	84	6801	6.015	-156.134	1	2	561
64W35	SAT64EL	EL	2011-12-31	-31.2971	29.9959	84	6817	47.178	36.7543	1	2	562
64W35	SAT64EL	EL	2011-12-31	-31.2873	30.0023	3	6805	53.5561	79.5363	1	2	563
64W35	SAT64EL	EL	2011-12-31	-31.2905	30.0074	84	6802	78.0098	-31.9883	1	2	564
64W35	SAT64EL	EL	2011-12-31	-31.2965	29.9966	84	6816	107.63	38.9499	1	2	565
64W35	SAT64EL	EL	2011-12-31	-31.2763	30.0021	23	6808	172.986	34.572	1	2	566
64W35	SAT64EL	EL	2011-12-31	-31.287	30.0027	3	6806	238.795	-62.6802	1	2	567
64W35	SAT64EL	EL	2011-12-31	-31.2911	30.0079	84	6803	326.891	131.883	1	2	568
64W35	SAT64EL	EL	2011-12-31	-31.2782	30.008	27	6812	338.451	55.5684	1	2	569
64W35	SAT64EL	EL	2011-12-31	-31.2751	30.0031	34	6809	359.104	42.1993	1	2	570
64W35	SAT64EL	EL	2011-12-31	-31.2989	30.0004	84	6819	423.693	159.453	1	2	571
64W35	SAT64EL	EL	2011-12-31	-31.2778	30.0048	27	6813	459.239	-18.9846	1	2	572
64W35	SAT64EL	EL	2011-12-31	-31.2906	30.0047	55	6804	472.294	48.1985	1	2	573
64W35	SAT64EL	EL	2011-12-31	-31.2751	30.0112	34	6811	490.502	121.776	1	2	574
64W35	SAT64EL	EL	2011-12-31	-31.2744	30.0064	34	6810	494.654	23.0315	1	2	575
64W35	SAT64EL	EL	2011-12-31	-31.2972	29.9954	84	6818	557.743	-147.987	1	2	576
64W35	SAT64EL	EL	2011-12-31	-31.2786	30.0004	23	6814	1024.34	-60.9559	1	2	577
64W35	SAT64EL	EL	2011-12-31	-31.2851	30.0021	3	6807	1060.55	15.0437	1	2	578
64W35	SAT64EL	EL	2011-12-31	-31.2867	29.9975	3	6815	1174.36	-12.7451	1	2	579
64W36	SAT64EL	EL	2012-01-04	-31.3099	29.9869	84	7012	3.96927	-64.8886	1	2	580
64W36	SAT64EL	EL	2012-01-04	-31.3099	29.9869	84	7013	3.96927	-1.34023e-05	1	2	581
64W36	SAT64EL	EL	2012-01-04	-31.306	29.9946	55	7002	7.21597	-178.303	1	2	582
64W36	SAT64EL	EL	2012-01-04	-31.3071	29.9856	84	7018	13.1587	-108.526	1	2	583
64W36	SAT64EL	EL	2012-01-04	-31.3059	29.9951	55	7000	20.3751	-999	1	2	584
64W36	SAT64EL	EL	2012-01-04	-31.3113	29.9851	84	7009	32.8899	-104.805	1	2	585
64W36	SAT64EL	EL	2012-01-04	-31.31	29.9866	84	7011	37.9808	25.4	1	2	586
64W36	SAT64EL	EL	2012-01-04	-31.306	29.9947	55	7003	45.6872	122.374	1	2	587
64W36	SAT64EL	EL	2012-01-04	-31.3061	29.9951	55	7001	55.2224	114.394	1	2	588
64W36	SAT64EL	EL	2012-01-04	-31.3098	29.9877	84	7015	58.563	28.6938	1	2	589
64W36	SAT64EL	EL	2012-01-04	-31.3098	29.9869	84	7014	77.691	85.5595	1	2	590
64W36	SAT64EL	EL	2012-01-04	-31.3086	29.9859	84	7007	93.5843	-61.6956	1	2	591
64W36	SAT64EL	EL	2012-01-04	-31.31	29.9882	84	7016	134.891	-167.759	1	2	592
64W36	SAT64EL	EL	2012-01-04	-31.3112	29.9854	84	7010	189.521	-43.3673	1	2	593
64W36	SAT64EL	EL	2012-01-04	-31.3072	29.9855	84	7019	194.848	-134.19	1	2	594
64W36	SAT64EL	EL	2012-01-04	-31.3092	29.9854	84	7008	244.79	-20.9552	1	2	595
64W36	SAT64EL	EL	2012-01-04	-31.3091	29.992	55	7005	283.251	65.6718	1	2	596
64W36	SAT64EL	EL	2012-01-04	-31.3093	29.9871	84	7017	305.761	22.6801	1	2	597
64W36	SAT64EL	EL	2012-01-04	-31.3086	29.9893	84	7006	352.806	-11.5501	1	2	598
64W36	SAT64EL	EL	2012-01-04	-31.3062	29.9944	55	7004	419.838	-12.6489	1	2	599
64W37	SAT64EL	EL	2012-01-08	-31.2949	29.9645	36	7203	10.5818	-16.4301	3	2	600
64W37	SAT64EL	EL	2012-01-08	-31.2905	29.9696	36	7213	12.0272	139.587	3	2	601
64W37	SAT64EL	EL	2012-01-08	-31.2904	29.9697	36	7212	18.482	172.661	3	2	602
64W37	SAT64EL	EL	2012-01-08	-31.295	29.9642	36	7205	30.9045	-20.678	3	2	603
64W37	SAT64EL	EL	2012-01-08	-31.2924	29.9655	36	7208	32.8491	0.0253619	3	2	604
64W37	SAT64EL	EL	2012-01-08	-31.295	29.9645	36	7204	38.1243	103.223	3	2	605
64W37	SAT64EL	EL	2012-01-08	-31.294	29.965	36	7201	62.1047	-92.9542	3	2	606
64W37	SAT64EL	EL	2012-01-08	-31.2941	29.9644	36	7202	100.316	-89.1746	3	2	607
64W37	SAT64EL	EL	2012-01-08	-31.295	29.9651	36	7200	122.325	-999	3	2	608
64W37	SAT64EL	EL	2012-01-08	-31.2936	29.9651	36	7207	155.741	-23.4531	3	2	609
64W37	SAT64EL	EL	2012-01-08	-31.2881	29.9579	84	7218	214.803	16.7227	3	2	610
64W37	SAT64EL	EL	2012-01-08	-31.2951	29.9639	36	7206	221.84	152.425	3	2	611
64W37	SAT64EL	EL	2012-01-08	-31.2921	29.9655	36	7209	243.909	-96.5036	3	2	612
64W37	SAT64EL	EL	2012-01-08	-31.2901	29.9591	84	7217	261.749	-11.4667	3	2	613
64W37	SAT64EL	EL	2012-01-08	-31.2864	29.9575	84	7219	333.493	-31.8278	3	2	614
64W37	SAT64EL	EL	2012-01-08	-31.2925	29.967	36	7211	369.763	-52.4889	3	2	615
64W37	SAT64EL	EL	2012-01-08	-31.2919	29.9632	36	7210	405.769	-175.415	3	2	616
64W37	SAT64EL	EL	2012-01-08	-31.2904	29.9696	36	7214	443.446	-161.672	3	2	617
64W37	SAT64EL	EL	2012-01-08	-31.2947	29.9607	36	7216	577.874	79.3879	3	2	618
64W37	SAT64EL	EL	2012-01-08	-31.2939	29.9682	36	7215	780.928	65.4811	3	2	619
64W38	SAT64EL	EL	2012-01-12	-31.2468	29.9681	38	7412	2.69584	36.3791	3	1	620
64W38	SAT64EL	EL	2012-01-12	-31.2505	29.9669	38	7409	6.01393	-140.993	3	1	621
64W38	SAT64EL	EL	2012-01-12	-31.2468	29.9681	38	7413	8.22664	29.0746	3	1	622
64W38	SAT64EL	EL	2012-01-13	-31.2512	29.9633	22	7419	10.5492	-24.7463	3	1	623
64W38	SAT64EL	EL	2012-01-12	-31.2468	29.9683	38	7411	17.7093	-94.8867	3	1	624
64W38	SAT64EL	EL	2012-01-12	-31.248	29.9663	38	7415	97.9034	-1.32978	3	1	625
64W38	SAT64EL	EL	2012-01-12	-31.2508	29.9638	38	7406	115.099	-25.3583	3	1	626
64W38	SAT64EL	EL	2012-01-12	-31.2485	29.9656	38	7416	129.832	94.2524	3	1	627
64W38	SAT64EL	EL	2012-01-12	-31.2496	29.9681	38	7402	130.795	-57.5097	3	1	628
64W38	SAT64EL	EL	2012-01-12	-31.2485	29.9678	38	7403	138.842	48.7921	3	1	629
64W38	SAT64EL	EL	2012-01-13	-31.2499	29.9634	21	7418	151.142	-21.8969	3	1	630
64W38	SAT64EL	EL	2012-01-12	-31.2519	29.9683	22	7408	224.437	-130.94	3	1	631
64W38	SAT64EL	EL	2012-01-12	-31.2467	29.9681	38	7414	239.199	-117.982	3	1	632
64W38	SAT64EL	EL	2012-01-12	-31.2512	29.9661	38	7401	274.855	128.786	3	1	633
64W38	SAT64EL	EL	2012-01-12	-31.2477	29.9648	38	7417	310.377	-115.563	3	1	634
64W38	SAT64EL	EL	2012-01-12	-31.2486	29.9655	38	7405	322.475	-38.39	3	1	635
64W38	SAT64EL	EL	2012-01-12	-31.2476	29.9686	38	7404	345.006	-146.743	3	1	636
64W38	SAT64EL	EL	2012-01-12	-31.2516	29.9701	31	7400	408.119	-999	3	1	637
64W38	SAT64EL	EL	2012-01-12	-31.2505	29.9669	38	7410	461.192	-162.163	3	1	638
64W38	SAT64EL	EL	2012-01-12	-31.2518	29.9637	38	7407	473.972	-94.9751	3	1	639
64W39	SAT64EL	EL	2012-01-16	-31.2543	29.9665	38	7600	0	-999	2	1	640
64W39	SAT64EL	EL	2012-01-17	-31.2512	29.9661	38	7615	3.96917	-76.7444	2	1	641
64W39	SAT64EL	EL	2012-01-16	-31.2545	29.9664	38	7605	3.97612	-115.95	2	1	642
64W39	SAT64EL	EL	2012-01-17	-31.2512	29.9662	38	7614	8.91808	60.915	2	1	643
64W39	SAT64EL	EL	2012-01-16	-31.2543	29.9665	38	7601	9.17075	-999	2	1	644
64W39	SAT64EL	EL	2012-01-17	-31.2511	29.9662	38	7613	12.502	-168.021	2	1	645
64W39	SAT64EL	EL	2012-01-16	-31.2546	29.9664	38	7603	16.093	-27.3653	2	1	646
64W39	SAT64EL	EL	2012-01-16	-31.2547	29.9664	38	7604	20.163	-178.731	2	1	647
64W39	SAT64EL	EL	2012-01-16	-31.2545	29.9664	38	7606	22.6706	-159.136	2	1	648
64W39	SAT64EL	EL	2012-01-17	-31.2513	29.9662	38	7612	26.1594	44.5189	2	1	649
64W39	SAT64EL	EL	2012-01-17	-31.2513	29.9661	38	7616	39.9682	17.4528	2	1	650
64W39	SAT64EL	EL	2012-01-16	-31.2542	29.9666	38	7602	43.0596	152.077	2	1	651
64W39	SAT64EL	EL	2012-01-17	-31.2517	29.9665	38	7611	50.2675	48.1687	2	1	652
64W39	SAT64EL	EL	2012-01-17	-31.2517	29.9674	38	7610	94.7813	-8.81563	2	1	653
64W39	SAT64EL	EL	2012-01-17	-31.2529	29.9699	6	7608	133.466	-7.18143	2	1	654
64W39	SAT64EL	EL	2012-01-17	-31.2484	29.9686	38	7618	260.55	-35.7706	2	1	655
64W39	SAT64EL	EL	2012-01-17	-31.2522	29.9709	6	7609	370.706	-133.139	2	1	656
64W39	SAT64EL	EL	2012-01-17	-31.2545	29.9666	38	7607	396.645	-19.6184	2	1	657
64W39	SAT64EL	EL	2012-01-17	-31.2463	29.9685	38	7619	403.996	120.821	2	1	658
64W39	SAT64EL	EL	2012-01-17	-31.2516	29.966	38	7617	465.143	-162.432	2	1	659
64W4	SAT64EL	EL	2011-08-23	-31.303	29.9772	84	617	3.5115	-151.276	1	2	660
64W4	SAT64EL	EL	2011-08-23	-31.303	29.9772	84	616	4.00427	-52.3679	1	2	661
64W4	SAT64EL	EL	2011-08-23	-31.2996	29.9807	84	611	6.58734	-71.006	1	2	662
64W4	SAT64EL	EL	2011-08-23	-31.3031	29.9773	84	619	9.16768	168.485	1	2	663
64W4	SAT64EL	EL	2011-08-23	-31.2996	29.9807	84	610	10.5828	-40.9475	1	2	664
64W4	SAT64EL	EL	2011-08-23	-31.3029	29.977	84	615	14.9948	-109.019	1	2	665
64W4	SAT64EL	EL	2011-08-23	-31.303	29.9772	84	618	22.7378	-127.491	1	2	666
64W4	SAT64EL	EL	2011-08-23	-31.3002	29.9802	84	613	55.4769	35.4017	1	2	667
64W4	SAT64EL	EL	2011-08-23	-31.3022	29.9967	84	602	80.3993	12.5811	1	2	668
64W4	SAT64EL	EL	2011-08-23	-31.3029	29.9967	84	603	90.3647	-6.95914	1	2	669
64W4	SAT64EL	EL	2011-08-23	-31.2995	29.9807	84	612	96.1725	-99.4741	1	2	670
64W4	SAT64EL	EL	2011-08-23	-31.3013	29.9965	84	601	111.527	-129.103	1	2	671
64W4	SAT64EL	EL	2011-08-23	-31.3004	29.9792	84	609	182.231	-49.6758	1	2	672
64W4	SAT64EL	EL	2011-08-23	-31.2982	29.9775	84	607	195.478	-77.4709	1	2	673
64W4	SAT64EL	EL	2011-08-23	-31.2995	29.9762	84	608	322.383	-110.647	1	2	674
64W4	SAT64EL	EL	2011-08-23	-31.3037	29.9967	84	604	400.566	100.173	1	2	675
64W4	SAT64EL	EL	2011-08-23	-31.3004	29.9797	84	614	408.907	-21.6403	1	2	676
64W4	SAT64EL	EL	2011-08-23	-31.3031	30.0002	55	600	438.278	-999	1	2	677
64W4	SAT64EL	EL	2011-08-23	-31.301	29.9833	84	606	688.964	12.4248	1	2	678
64W4	SAT64EL	EL	2011-08-23	-31.3032	29.9929	84	605	1022.86	8.78859	1	2	679
64W40	SAT64EL	EL	2012-01-21	-31.2466	29.9711	38	7803	0	-999	2	1	680
64W40	SAT64EL	EL	2012-01-21	-31.2466	29.971	38	7806	2.69594	101.96	2	1	681
64W40	SAT64EL	EL	2012-01-21	-31.2466	29.9709	38	7805	4.00631	-158.367	2	1	682
64W40	SAT64EL	EL	2012-01-21	-31.2489	29.9727	38	7816	5.16731	158.41	2	1	683
64W40	SAT64EL	EL	2012-01-21	-31.2466	29.9711	38	7802	5.32511	139.465	2	1	684
64W40	SAT64EL	EL	2012-01-21	-31.2489	29.9728	38	7815	5.55716	57.3598	2	1	685
64W40	SAT64EL	EL	2012-01-21	-31.2465	29.9713	38	7800	6.01413	-999	2	1	686
64W40	SAT64EL	EL	2012-01-21	-31.2466	29.9711	38	7804	15.6212	-999	2	1	687
64W40	SAT64EL	EL	2012-01-21	-31.2466	29.9713	38	7801	24.425	80.3602	2	1	688
64W40	SAT64EL	EL	2012-01-21	-31.2466	29.9709	38	7807	58.1964	-44.0286	2	1	689
64W40	SAT64EL	EL	2012-01-21	-31.2489	29.9728	38	7817	93.3605	-25.4058	2	1	690
64W40	SAT64EL	EL	2012-01-21	-31.2472	29.9742	38	7819	109.904	83.4385	2	1	691
64W40	SAT64EL	EL	2012-01-21	-31.2486	29.9727	38	7811	111.469	15.3367	2	1	692
64W40	SAT64EL	EL	2012-01-21	-31.2483	29.9737	38	7814	116.676	-132.182	2	1	693
64W40	SAT64EL	EL	2012-01-21	-31.2493	29.9735	38	7813	123.099	-84.9896	2	1	694
64W40	SAT64EL	EL	2012-01-21	-31.2461	29.9731	31	7809	125.84	30.7724	2	1	695
64W40	SAT64EL	EL	2012-01-21	-31.2493	29.9719	38	7812	167.16	-132.654	2	1	696
64W40	SAT64EL	EL	2012-01-21	-31.2485	29.9736	38	7818	168.906	-44.2933	2	1	697
64W40	SAT64EL	EL	2012-01-21	-31.2471	29.971	38	7808	244.163	-115.605	2	1	698
64W40	SAT64EL	EL	2012-01-21	-31.2461	29.9743	31	7810	340.696	116.912	2	1	699
64W41	SAT64EL	EL	2012-01-25	-31.2463	29.9673	38	8015	26.1821	-11.804	2	1	700
64W41	SAT64EL	EL	2012-01-25	-31.2525	29.97	6	8003	40.9372	42.0072	2	1	701
64W41	SAT64EL	EL	2012-01-25	-31.2506	29.9718	38	8008	60.6109	-124.569	2	1	702
64W41	SAT64EL	EL	2012-01-25	-31.251	29.9721	38	8009	99.2269	22.8027	2	1	703
64W41	SAT64EL	EL	2012-01-25	-31.246	29.97	38	8019	105.185	-124.408	2	1	704
64W41	SAT64EL	EL	2012-01-25	-31.2481	29.9671	38	8013	105.571	-7.2572	2	1	705
64W41	SAT64EL	EL	2012-01-25	-31.2555	29.965	38	8000	125.054	-999	2	1	706
64W41	SAT64EL	EL	2012-01-25	-31.2515	29.9743	38	8006	129.901	-161.234	2	1	707
64W41	SAT64EL	EL	2012-01-25	-31.2451	29.9707	31	8018	132.735	1.65921	2	1	708
64W41	SAT64EL	EL	2012-01-25	-31.2439	29.9715	31	8017	162.808	152.578	2	1	709
64W41	SAT64EL	EL	2012-01-25	-31.2507	29.9735	38	8007	181.251	-46.6693	2	1	710
64W41	SAT64EL	EL	2012-01-25	-31.2478	29.9661	38	8014	213.049	106.244	2	1	711
64W41	SAT64EL	EL	2012-01-25	-31.2505	29.9724	38	8005	228.856	78.1545	2	1	712
64W41	SAT64EL	EL	2012-01-25	-31.2518	29.9722	38	8010	231.391	-120.632	2	1	713
64W41	SAT64EL	EL	2012-01-25	-31.2523	29.9704	6	8004	309.864	-13.9193	2	1	714
64W41	SAT64EL	EL	2012-01-25	-31.2563	29.9658	38	8001	354.319	-67.4611	2	1	715
64W41	SAT64EL	EL	2012-01-25	-31.2555	29.9691	6	8002	368.157	-58.7755	2	1	716
64W41	SAT64EL	EL	2012-01-25	-31.2506	29.9739	38	8011	405.756	70.5036	2	1	717
64W41	SAT64EL	EL	2012-01-25	-31.2462	29.9674	38	8016	506.061	34.6955	2	1	718
64W41	SAT64EL	EL	2012-01-25	-31.2524	29.9773	10	8012	1177.22	174.152	2	1	719
64W42	SAT64EL	EL	2012-01-29	-31.2512	29.9679	38	8214	1.65344	142.19	3	1	720
64W42	SAT64EL	EL	2012-01-29	-31.2519	29.9684	22	8202	5.55689	-32.7826	3	1	721
64W42	SAT64EL	EL	2012-01-29	-31.2519	29.9685	22	8203	5.55689	-180	3	1	722
64W42	SAT64EL	EL	2012-01-29	-31.2519	29.9683	22	8201	10.5343	-8.43329	3	1	723
64W42	SAT64EL	EL	2012-01-29	-31.2511	29.9678	38	8213	19.62	0.584705	3	1	724
64W42	SAT64EL	EL	2012-01-29	-31.2566	29.9629	22	8219	77.5366	110.652	3	1	725
64W42	SAT64EL	EL	2012-01-29	-31.2517	29.9675	38	8200	89.5254	-999	3	1	726
64W42	SAT64EL	EL	2012-01-29	-31.2507	29.967	38	8212	99.4116	-68.9661	3	1	727
64W42	SAT64EL	EL	2012-01-29	-31.2496	29.9674	38	8211	135.643	-66.2196	3	1	728
64W42	SAT64EL	EL	2012-01-29	-31.2502	29.9702	31	8208	199.967	46.3147	3	1	729
64W42	SAT64EL	EL	2012-01-29	-31.2514	29.9638	38	8217	204.055	49.0763	3	1	730
64W42	SAT64EL	EL	2012-01-29	-31.2523	29.9655	38	8216	207.231	56.6164	3	1	731
64W42	SAT64EL	EL	2012-01-29	-31.2519	29.9684	22	8204	209.253	-90.1475	3	1	732
64W42	SAT64EL	EL	2012-01-29	-31.2491	29.9716	38	8209	209.971	-144.179	3	1	733
64W42	SAT64EL	EL	2012-01-29	-31.2535	29.9692	22	8205	213.332	9.60469	3	1	734
64W42	SAT64EL	EL	2012-01-29	-31.2493	29.9696	31	8210	227.695	-0.449184	3	1	735
64W42	SAT64EL	EL	2012-01-29	-31.2512	29.9679	38	8215	275.058	-26.4058	3	1	736
64W42	SAT64EL	EL	2012-01-29	-31.2525	29.9701	6	8207	278.713	-8.54549	3	1	737
64W42	SAT64EL	EL	2012-01-29	-31.2553	29.9696	6	8206	331.124	-158.597	3	1	738
64W42	SAT64EL	EL	2012-01-29	-31.2497	29.9634	21	8218	827.766	-165.473	3	1	739
64W43	SAT64EL	EL	2012-02-02	-31.2591	29.9598	6	8411	2.62934	-17.395	3	2	740
64W43	SAT64EL	EL	2012-02-02	-31.2647	29.9631	22	8417	2.6955	51.8853	3	2	741
64W43	SAT64EL	EL	2012-02-02	-31.2647	29.9632	22	8419	5.16599	-180	3	2	742
64W43	SAT64EL	EL	2012-02-02	-31.2647	29.9631	22	8418	8.57554	-130.665	3	2	743
64W43	SAT64EL	EL	2012-02-02	-31.2595	29.96	22	8410	51.7287	92.6761	3	2	744
64W43	SAT64EL	EL	2012-02-02	-31.2651	29.9638	22	8414	87.653	-8.77719	3	2	745
64W43	SAT64EL	EL	2012-02-02	-31.2639	29.9629	22	8416	106.186	-158.835	3	2	746
64W43	SAT64EL	EL	2012-02-02	-31.2591	29.9598	6	8412	170.955	-167.997	3	2	747
64W43	SAT64EL	EL	2012-02-02	-31.2537	29.9646	38	8403	182.138	-123.406	3	2	748
64W43	SAT64EL	EL	2012-02-02	-31.2569	29.9677	22	8405	189.457	120.429	3	2	749
64W43	SAT64EL	EL	2012-02-02	-31.253	29.9689	22	8401	233.843	-104.36	3	2	750
64W43	SAT64EL	EL	2012-02-02	-31.2575	29.9626	22	8407	238.217	74.8074	3	2	751
64W43	SAT64EL	EL	2012-02-02	-31.2657	29.9643	17	8415	263.489	-173.466	3	2	752
64W43	SAT64EL	EL	2012-02-02	-31.2585	29.9625	22	8409	283.291	83.9212	3	2	753
64W43	SAT64EL	EL	2012-02-02	-31.2541	29.9659	38	8400	341.823	-999	3	2	754
64W43	SAT64EL	EL	2012-02-02	-31.2558	29.9614	22	8408	348.091	-167.288	3	2	755
64W43	SAT64EL	EL	2012-02-02	-31.2567	29.9659	38	8406	355.998	-23.601	3	2	756
64W43	SAT64EL	EL	2012-02-02	-31.254	29.9663	38	8404	373.274	52.1757	3	2	757
64W43	SAT64EL	EL	2012-02-02	-31.2514	29.9676	38	8402	401.104	-94.1474	3	2	758
64W43	SAT64EL	EL	2012-02-02	-31.2604	29.9605	22	8413	665.209	-3.18502	3	2	759
64W44	SAT64EL	EL	2012-02-07	-31.2451	29.9743	31	8616	1.75698	-3.06068e-05	1	1	760
64W44	SAT64EL	EL	2012-02-06	-31.2508	29.9744	38	8605	2.60582	-42.3925	1	1	761
64W44	SAT64EL	EL	2012-02-06	-31.2508	29.9744	38	8604	4.08966	-78.2226	1	1	762
64W44	SAT64EL	EL	2012-02-06	-31.2508	29.9744	38	8606	4.34076	-161.482	1	1	763
64W44	SAT64EL	EL	2012-02-07	-31.2452	29.9743	31	8614	7.22023	-153.582	1	1	764
64W44	SAT64EL	EL	2012-02-07	-31.2451	29.9744	31	8615	8.57821	-163.548	1	1	765
64W44	SAT64EL	EL	2012-02-07	-31.2434	29.9748	31	8619	9.09421	-77.0959	1	1	766
64W44	SAT64EL	EL	2012-02-07	-31.2451	29.9744	31	8613	11.8457	174.937	1	1	767
64W44	SAT64EL	EL	2012-02-07	-31.2452	29.9742	31	8612	19.6221	3.48043	1	1	768
64W44	SAT64EL	EL	2012-02-06	-31.2523	29.9774	10	8600	29.8711	-999	1	1	769
64W44	SAT64EL	EL	2012-02-06	-31.2508	29.9744	38	8607	36.7104	1.88635	1	1	770
64W44	SAT64EL	EL	2012-02-06	-31.2472	29.9713	38	8609	71.7445	96.7147	1	1	771
64W44	SAT64EL	EL	2012-02-07	-31.2437	29.9754	31	8618	72.1563	-88.8947	1	1	772
64W44	SAT64EL	EL	2012-02-06	-31.2459	29.9733	31	8611	121.59	-0.9545	1	1	773
64W44	SAT64EL	EL	2012-02-06	-31.2521	29.9773	6	8601	153.022	-55.3315	1	1	774
64W44	SAT64EL	EL	2012-02-06	-31.2518	29.9759	38	8602	185.162	98.569	1	1	775
64W44	SAT64EL	EL	2012-02-06	-31.2469	29.9719	38	8610	191.978	-10.1361	1	1	776
64W44	SAT64EL	EL	2012-02-07	-31.2451	29.9743	31	8617	209.377	124.589	1	1	777
64W44	SAT64EL	EL	2012-02-06	-31.2504	29.9766	38	8603	235.734	-124.776	1	1	778
64W44	SAT64EL	EL	2012-02-06	-31.2505	29.9742	38	8608	499.002	-14.927	1	1	779
64W45	SAT64EL	EL	2012-02-11	-31.2491	29.9691	38	8811	2.69582	91.5655	3	2	780
64W45	SAT64EL	EL	2012-02-11	-31.2517	29.9665	38	8805	6.51543	25.2352	3	2	781
64W45	SAT64EL	EL	2012-02-11	-31.2491	29.9691	38	8809	17.0551	-6.68845	3	2	782
64W45	SAT64EL	EL	2012-02-11	-31.249	29.9692	38	8810	20.9368	-177.384	3	2	783
64W45	SAT64EL	EL	2012-02-11	-31.2518	29.9668	38	8804	28.2391	30.2459	3	2	784
64W45	SAT64EL	EL	2012-02-11	-31.2491	29.9691	38	8812	36.2023	-119.993	3	2	785
64W45	SAT64EL	EL	2012-02-10	-31.2507	29.9663	38	8800	39.2399	-999	3	2	786
64W45	SAT64EL	EL	2012-02-11	-31.2516	29.9674	38	8803	65.1762	160.597	3	2	787
64W45	SAT64EL	EL	2012-02-11	-31.2494	29.969	38	8813	72.3325	146.858	3	2	788
64W45	SAT64EL	EL	2012-02-10	-31.2516	29.9666	38	8802	75.8753	-87.3666	3	2	789
64W45	SAT64EL	EL	2012-02-10	-31.2509	29.9666	38	8801	80.2426	51.0109	3	2	790
64W45	SAT64EL	EL	2012-02-11	-31.2517	29.9664	38	8806	106.245	122.615	3	2	791
64W45	SAT64EL	EL	2012-02-11	-31.2497	29.9761	38	8818	118.138	-26.976	3	2	792
64W45	SAT64EL	EL	2012-02-11	-31.2514	29.9674	38	8807	171.108	-56.7704	3	2	793
64W45	SAT64EL	EL	2012-02-11	-31.25	29.9678	38	8808	175.202	38.4639	3	2	794
64W45	SAT64EL	EL	2012-02-11	-31.2507	29.9763	38	8819	200.099	-9.53844	3	2	795
64W45	SAT64EL	EL	2012-02-11	-31.2444	29.9757	31	8816	223.198	42.0503	3	2	796
64W45	SAT64EL	EL	2012-02-11	-31.2488	29.9688	38	8814	446.028	48.9259	3	2	797
64W45	SAT64EL	EL	2012-02-11	-31.2458	29.9713	38	8815	489.078	34.9928	3	2	798
64W45	SAT64EL	EL	2012-02-11	-31.2451	29.9777	31	8817	586.595	84.7394	3	2	799
64W46	SAT64EL	EL	2012-02-15	-31.2537	29.9747	6	9011	0	-999	1	2	800
64W46	SAT64EL	EL	2012-02-15	-31.2388	29.9828	31	9000	2.63007	-999	1	2	801
64W46	SAT64EL	EL	2012-02-15	-31.2537	29.9747	6	9012	3.97636	-999	1	2	802
64W46	SAT64EL	EL	2012-02-15	-31.2381	29.9823	31	9002	4.34117	-170.413	1	2	803
64W46	SAT64EL	EL	2012-02-15	-31.2381	29.9824	31	9003	6.91451	174.318	1	2	804
64W46	SAT64EL	EL	2012-02-15	-31.2512	29.9748	38	9019	20.375	94.8838	1	2	805
64W46	SAT64EL	EL	2012-02-15	-31.2513	29.9758	38	9017	31.0631	-119.655	1	2	806
64W46	SAT64EL	EL	2012-02-15	-31.2513	29.9754	38	9018	72.5907	1.20004	1	2	807
64W46	SAT64EL	EL	2012-02-15	-31.2542	29.972	6	9014	81.8477	-52.8941	1	2	808
64W46	SAT64EL	EL	2012-02-15	-31.2519	29.9753	38	9016	91.1446	-13.9056	1	2	809
64W46	SAT64EL	EL	2012-02-15	-31.2387	29.9828	31	9001	93.7267	-72.4282	1	2	810
64W46	SAT64EL	EL	2012-02-15	-31.255	29.971	6	9009	103.547	-124.5	1	2	811
64W46	SAT64EL	EL	2012-02-15	-31.2534	29.973	6	9008	284.09	16.8157	1	2	812
64W46	SAT64EL	EL	2012-02-15	-31.2537	29.9747	6	9013	285.427	18.7825	1	2	813
64W46	SAT64EL	EL	2012-02-15	-31.2381	29.9823	31	9004	319.732	-92.6584	1	2	814
64W46	SAT64EL	EL	2012-02-15	-31.2552	29.972	6	9010	332.712	-43.6303	1	2	815
64W46	SAT64EL	EL	2012-02-15	-31.2505	29.9748	38	9007	395.99	6.95952	1	2	816
64W46	SAT64EL	EL	2012-02-15	-31.2548	29.9716	6	9015	512.553	-157.829	1	2	817
64W46	SAT64EL	EL	2012-02-15	-31.2455	29.9772	31	9006	646.179	1.7965	1	2	818
64W46	SAT64EL	EL	2012-02-15	-31.2395	29.9797	31	9005	766.435	-37.6696	1	2	819
64W47	SAT64EL	EL	2012-02-19	-31.2442	29.9782	31	9214	18.153	-118.2	1	1	820
64W47	SAT64EL	EL	2012-02-19	-31.2442	29.9787	31	9213	58.4994	-119.996	1	1	821
64W47	SAT64EL	EL	2012-02-19	-31.2447	29.9745	31	9200	114.557	-999	1	1	822
64W47	SAT64EL	EL	2012-02-19	-31.2439	29.9765	31	9205	149.977	24.4808	1	1	823
64W47	SAT64EL	EL	2012-02-19	-31.2443	29.9782	31	9215	150.626	145.072	1	1	824
64W47	SAT64EL	EL	2012-02-19	-31.2472	29.9775	31	9210	155.826	-18.4081	1	1	825
64W47	SAT64EL	EL	2012-02-19	-31.2437	29.9731	31	9203	183.183	42.5626	1	1	826
64W47	SAT64EL	EL	2012-02-19	-31.245	29.9772	31	9206	194.392	30.1297	1	1	827
64W47	SAT64EL	EL	2012-02-19	-31.2466	29.9772	31	9207	218.037	142.605	1	1	828
64W47	SAT64EL	EL	2012-02-19	-31.2485	29.9773	38	9211	256.715	173.138	1	1	829
64W47	SAT64EL	EL	2012-02-19	-31.2431	29.9702	31	9219	266.996	-164.758	1	1	830
64W47	SAT64EL	EL	2012-02-19	-31.2452	29.971	31	9218	270.653	65.4276	1	1	831
64W47	SAT64EL	EL	2012-02-19	-31.246	29.9731	31	9202	282.689	123.419	1	1	832
64W47	SAT64EL	EL	2012-02-19	-31.2425	29.9742	31	9204	287.118	84.039	1	1	833
64W47	SAT64EL	EL	2012-02-19	-31.2463	29.9773	31	9212	296.255	29.2336	1	1	834
64W47	SAT64EL	EL	2012-02-19	-31.2452	29.9759	31	9208	307.581	117.127	1	1	835
64W47	SAT64EL	EL	2012-02-19	-31.2445	29.9756	31	9201	318.312	152.947	1	1	836
64W47	SAT64EL	EL	2012-02-19	-31.2455	29.9742	31	9217	325.581	42.2799	1	1	837
64W47	SAT64EL	EL	2012-02-19	-31.2447	29.9789	31	9209	325.703	125.782	1	1	838
64W47	SAT64EL	EL	2012-02-19	-31.2438	29.9769	31	9216	358.989	-63.1532	1	1	839
64W48	SAT64EL	EL	2012-02-23	-31.2518	29.9634	22	9416	2.69573	40.6675	1	2	840
64W48	SAT64EL	EL	2012-02-23	-31.2519	29.9634	22	9415	3.9691	149.705	1	2	841
64W48	SAT64EL	EL	2012-02-23	-31.2516	29.9733	38	9402	5.16716	56.7906	1	2	842
64W48	SAT64EL	EL	2012-02-23	-31.2518	29.9634	22	9414	6.96496	48.1448	1	2	843
64W48	SAT64EL	EL	2012-02-23	-31.2518	29.9634	22	9417	10.1363	149.313	1	2	844
64W48	SAT64EL	EL	2012-02-23	-31.2519	29.9634	22	9418	12.627	98.3393	1	2	845
64W48	SAT64EL	EL	2012-02-23	-31.2507	29.963	21	9411	42.1033	20.463	1	2	846
64W48	SAT64EL	EL	2012-02-23	-31.2506	29.9634	21	9412	69.3055	126.877	1	2	847
64W48	SAT64EL	EL	2012-02-23	-31.2511	29.9632	22	9413	84.2806	-35.1998	1	2	848
64W48	SAT64EL	EL	2012-02-23	-31.2516	29.9734	38	9403	119.238	44.9218	1	2	849
64W48	SAT64EL	EL	2012-02-23	-31.2526	29.9725	38	9401	150.951	-71.0813	1	2	850
64W48	SAT64EL	EL	2012-02-23	-31.2519	29.9633	22	9419	159.48	145.611	1	2	851
64W48	SAT64EL	EL	2012-02-23	-31.2523	29.9708	6	9400	186.621	-999	1	2	852
64W48	SAT64EL	EL	2012-02-23	-31.2518	29.9614	55	9410	209.057	95.333	1	2	853
64W48	SAT64EL	EL	2012-02-23	-31.2528	29.979	10	9405	286.78	-126.28	1	2	854
64W48	SAT64EL	EL	2012-02-23	-31.2533	29.9734	6	9407	301.503	34.3816	1	2	855
64W48	SAT64EL	EL	2012-02-23	-31.2543	29.9643	38	9409	419.099	54.5945	1	2	856
64W48	SAT64EL	EL	2012-02-23	-31.2523	29.9742	38	9404	498.189	-37.7487	1	2	857
64W48	SAT64EL	EL	2012-02-23	-31.2507	29.9776	6	9406	531.171	-96.4184	1	2	858
64W48	SAT64EL	EL	2012-02-23	-31.2533	29.9705	6	9408	652.091	-8.77984	1	2	859
64W49	SAT64EL	EL	2012-02-27	-31.2284	29.9685	31	9605	1.75729	123.834	2	1	860
64W49	SAT64EL	EL	2012-02-28	-31.2309	29.9686	31	9619	2.53753	100.599	2	1	861
64W49	SAT64EL	EL	2012-02-28	-31.2275	29.9628	31	9614	2.69613	81.3505	2	1	862
64W49	SAT64EL	EL	2012-02-28	-31.2275	29.9628	31	9615	5.16837	49.3241	2	1	863
64W49	SAT64EL	EL	2012-02-27	-31.2267	29.9666	31	9608	5.16854	-21.2003	2	1	864
64W49	SAT64EL	EL	2012-02-27	-31.2294	29.9694	31	9602	14.0733	115.187	2	1	865
64W49	SAT64EL	EL	2012-02-27	-31.2285	29.9686	31	9604	21.721	10.0339	2	1	866
64W49	SAT64EL	EL	2012-02-28	-31.2277	29.9629	31	9613	23.789	130.531	2	1	867
64W49	SAT64EL	EL	2012-02-28	-31.227	29.9631	31	9612	79.1125	-23.4146	2	1	868
64W49	SAT64EL	EL	2012-02-27	-31.227	29.9673	31	9607	83.1552	-33.1205	2	1	869
64W49	SAT64EL	EL	2012-02-28	-31.2316	29.9679	31	9618	113.016	-95.7185	2	1	870
64W49	SAT64EL	EL	2012-02-27	-31.2293	29.9694	31	9603	116.792	-43.8696	2	1	871
64W49	SAT64EL	EL	2012-02-27	-31.2267	29.9665	31	9609	119.563	11.6069	2	1	872
64W49	SAT64EL	EL	2012-02-27	-31.226	29.9638	31	9611	142.158	-78.9793	2	1	873
64W49	SAT64EL	EL	2012-02-27	-31.2265	29.9654	31	9610	177.382	9.57944	2	1	874
64W49	SAT64EL	EL	2012-02-27	-31.2284	29.9685	31	9606	209.832	-125.681	2	1	875
64W49	SAT64EL	EL	2012-02-28	-31.2304	29.9664	31	9617	214.718	1.49134	2	1	876
64W49	SAT64EL	EL	2012-02-28	-31.2275	29.9629	31	9616	506.047	42.9589	2	1	877
64W49	SAT64EL	EL	2012-02-27	-31.2268	29.9758	31	9601	734.874	-23.3542	2	1	878
64W49	SAT64EL	EL	2012-02-27	-31.2265	29.9855	31	9600	1001.65	-999	2	1	879
64W5	SAT64EL	EL	2011-08-27	-31.2967	29.9923	84	811	0	-999	2	1	880
64W5	SAT64EL	EL	2011-08-28	-31.2967	29.9923	84	813	0	-999	2	1	881
64W5	SAT64EL	EL	2011-08-27	-31.2966	29.9923	84	806	1.75605	-93.8499	2	1	882
64W5	SAT64EL	EL	2011-08-28	-31.2967	29.9923	84	812	2.04489	-999	2	1	883
64W5	SAT64EL	EL	2011-08-27	-31.2966	29.9923	84	807	2.04489	90.001	2	1	884
64W5	SAT64EL	EL	2011-08-27	-31.2967	29.9923	84	809	2.60532	153.898	2	1	885
64W5	SAT64EL	EL	2011-08-27	-31.2968	29.9922	84	801	2.62931	-162.981	2	1	886
64W5	SAT64EL	EL	2011-08-27	-31.2967	29.9923	84	810	3.96949	-137.622	2	1	887
64W5	SAT64EL	EL	2011-08-28	-31.2963	29.9927	84	819	4.06403	85.8814	2	1	888
64W5	SAT64EL	EL	2011-08-27	-31.2968	29.9922	84	802	5.30011	99.5521	2	1	889
64W5	SAT64EL	EL	2011-08-27	-31.2966	29.9923	84	808	6.26547	163.723	2	1	890
64W5	SAT64EL	EL	2011-08-27	-31.2969	29.9923	84	804	9.47109	-165.051	2	1	891
64W5	SAT64EL	EL	2011-08-28	-31.2962	29.9928	84	818	12.0897	161.872	2	1	892
64W5	SAT64EL	EL	2011-08-28	-31.2963	29.9927	84	817	13.0283	80.3032	2	1	893
64W5	SAT64EL	EL	2011-08-27	-31.2968	29.9922	84	803	20.8511	173.506	2	1	894
64W5	SAT64EL	EL	2011-08-27	-31.2969	29.9923	84	805	26.1614	36.8957	2	1	895
64W5	SAT64EL	EL	2011-08-28	-31.2967	29.9923	84	814	53.9596	-999	2	1	896
64W5	SAT64EL	EL	2011-08-28	-31.2964	29.9926	84	815	54.9641	101.365	2	1	897
64W5	SAT64EL	EL	2011-08-28	-31.2967	29.993	84	816	59.0423	-171.281	2	1	898
64W5	SAT64EL	EL	2011-08-27	-31.2984	29.9915	84	800	207.468	-999	2	1	899
64W50	SAT64EL	EL	2012-03-03	-31.2995	29.9808	84	9810	1.75586	150.55	2	1	900
64W50	SAT64EL	EL	2012-03-03	-31.2995	29.9808	84	9811	1.75586	-180	2	1	901
64W50	SAT64EL	EL	2012-03-02	-31.2992	29.9812	84	9800	1.75588	-999	2	1	902
64W50	SAT64EL	EL	2012-03-03	-31.2985	29.9802	84	9804	3.51176	-30.9597	2	1	903
64W50	SAT64EL	EL	2012-03-03	-31.2995	29.9808	84	9809	3.91418	-175.249	2	1	904
64W50	SAT64EL	EL	2012-03-02	-31.2992	29.9812	84	9801	3.97472	30.9598	2	1	905
64W50	SAT64EL	EL	2012-03-03	-31.2985	29.9802	84	9803	3.97472	173.836	2	1	906
64W50	SAT64EL	EL	2012-03-03	-31.3015	29.9815	84	9819	8.81309	-119.238	2	1	907
64W50	SAT64EL	EL	2012-03-03	-31.3014	29.9815	84	9816	12.1345	23.706	2	1	908
64W50	SAT64EL	EL	2012-03-03	-31.3016	29.9815	84	9818	12.5015	166.13	2	1	909
64W50	SAT64EL	EL	2012-03-03	-31.2988	29.9797	84	9806	22.9958	-1.14325	2	1	910
64W50	SAT64EL	EL	2012-03-03	-31.3014	29.9816	84	9817	34.6145	110.566	2	1	911
64W50	SAT64EL	EL	2012-03-03	-31.3003	29.9809	84	9813	57.3309	28.2202	2	1	912
64W50	SAT64EL	EL	2012-03-03	-31.2985	29.9803	84	9805	66.5123	155.08	2	1	913
64W50	SAT64EL	EL	2012-03-03	-31.2993	29.9801	84	9808	71.963	-11.2916	2	1	914
64W50	SAT64EL	EL	2012-03-03	-31.2989	29.9795	84	9807	85.1441	-117.946	2	1	915
64W50	SAT64EL	EL	2012-03-03	-31.2995	29.9808	84	9812	99.3623	-98.9691	2	1	916
64W50	SAT64EL	EL	2012-03-03	-31.3008	29.9807	84	9814	114.896	5.5724	2	1	917
64W50	SAT64EL	EL	2012-03-03	-31.2992	29.9812	84	9802	129.538	6.16328	2	1	918
64W50	SAT64EL	EL	2012-03-03	-31.3016	29.9803	84	9815	135.216	-129.403	2	1	919
64W51	SAT64EL	EL	2012-03-07	-31.2942	30.0077	84	10017	2.60565	174.891	1	1	920
64W51	SAT64EL	EL	2012-03-07	-31.2921	30.0093	84	10011	2.62961	1.70799	1	1	921
64W51	SAT64EL	EL	2012-03-07	-31.2922	30.0093	84	10010	2.69575	98.6885	1	1	922
64W51	SAT64EL	EL	2012-03-07	-31.2921	30.0093	84	10009	2.6958	-116.738	1	1	923
64W51	SAT64EL	EL	2012-03-07	-31.2899	30.0116	55	10002	3.91535	-128.596	1	1	924
64W51	SAT64EL	EL	2012-03-07	-31.2942	30.0077	84	10018	3.97561	16.6627	1	1	925
64W51	SAT64EL	EL	2012-03-07	-31.2922	30.0093	84	10008	4.3003	103.352	1	1	926
64W51	SAT64EL	EL	2012-03-07	-31.2941	30.0077	84	10019	9.17018	169.968	1	1	927
64W51	SAT64EL	EL	2012-03-07	-31.2899	30.0117	55	10003	12.6254	-168.881	1	1	928
64W51	SAT64EL	EL	2012-03-07	-31.2921	30.0093	84	10012	32.9023	136.088	1	1	929
64W51	SAT64EL	EL	2012-03-07	-31.2926	30.0089	84	10014	70.7213	-106.644	1	1	930
64W51	SAT64EL	EL	2012-03-07	-31.2893	30.0111	55	10000	76.2209	-999	1	1	931
64W51	SAT64EL	EL	2012-03-07	-31.293	30.0094	84	10015	82.1705	112.636	1	1	932
64W51	SAT64EL	EL	2012-03-07	-31.2922	30.0096	84	10013	90.3375	136.042	1	1	933
64W51	SAT64EL	EL	2012-03-07	-31.2911	30.0121	55	10005	95.2869	-130.058	1	1	934
64W51	SAT64EL	EL	2012-03-07	-31.2891	30.0118	55	10001	97.4828	117.55	1	1	935
64W51	SAT64EL	EL	2012-03-07	-31.2905	30.0126	55	10006	117.079	-142.514	1	1	936
64W51	SAT64EL	EL	2012-03-07	-31.2933	30.0087	84	10016	154.17	-11.6877	1	1	937
64W51	SAT64EL	EL	2012-03-07	-31.2899	30.0116	55	10004	159.548	-91.1915	1	1	938
64W51	SAT64EL	EL	2012-03-07	-31.2908	30.0115	55	10007	276.589	-13.8667	1	1	939
64W52	SAT64EL	EL	2012-03-11	-31.2348	29.9861	31	10219	38.1709	-91.0045	2	1	940
64W52	SAT64EL	EL	2012-03-11	-31.2324	29.9874	41	10203	52.3913	-34.6694	2	1	941
64W52	SAT64EL	EL	2012-03-11	-31.2358	29.9898	31	10217	67.5361	143.209	2	1	942
64W52	SAT64EL	EL	2012-03-11	-31.2328	29.9873	41	10204	167.143	-98.9401	2	1	943
64W52	SAT64EL	EL	2012-03-11	-31.233	29.9889	41	10205	178.088	-144.026	2	1	944
64W52	SAT64EL	EL	2012-03-11	-31.2377	29.9863	31	10215	181.687	-1.50147	2	1	945
64W52	SAT64EL	EL	2012-03-11	-31.2299	29.9923	31	10207	242.894	153.847	2	1	946
64W52	SAT64EL	EL	2012-03-11	-31.2366	29.9874	31	10216	261.16	25.1325	2	1	947
64W52	SAT64EL	EL	2012-03-11	-31.2282	29.9913	31	10201	267.771	-177.08	2	1	948
64W52	SAT64EL	EL	2012-03-11	-31.2451	29.9837	15	10211	279.023	-88.7045	2	1	949
64W52	SAT64EL	EL	2012-03-11	-31.2436	29.9806	31	10210	363.89	-85.298	2	1	950
64W52	SAT64EL	EL	2012-03-11	-31.2363	29.9895	31	10218	389.828	87.2467	2	1	951
64W52	SAT64EL	EL	2012-03-11	-31.2303	29.9905	41	10202	402.861	33.8934	2	1	952
64W52	SAT64EL	EL	2012-03-11	-31.246	29.9806	31	10213	478.268	138.605	2	1	953
64W52	SAT64EL	EL	2012-03-11	-31.2315	29.9909	41	10208	506.527	38.2123	2	1	954
64W52	SAT64EL	EL	2012-03-11	-31.232	29.9876	41	10206	543.773	109.489	2	1	955
64W52	SAT64EL	EL	2012-03-11	-31.2431	29.985	15	10212	574.48	-156.982	2	1	956
64W52	SAT64EL	EL	2012-03-11	-31.242	29.9815	31	10214	716.752	32.5908	2	1	957
64W52	SAT64EL	EL	2012-03-11	-31.2352	29.9891	31	10200	867.983	-999	2	1	958
64W52	SAT64EL	EL	2012-03-11	-31.2326	29.9862	31	10209	1450.52	-52.2026	2	1	959
64W53	SAT64EL	EL	2012-03-15	-31.2458	29.9816	85	10400	1.75705	-999	1	2	960
64W53	SAT64EL	EL	2012-03-15	-31.2487	29.982	85	10417	12.7272	56.8714	1	2	961
64W53	SAT64EL	EL	2012-03-15	-31.249	29.9819	24	10416	33.2434	-167.907	1	2	962
64W53	SAT64EL	EL	2012-03-15	-31.2449	29.9845	15	10419	34.2132	-34.5694	1	2	963
64W53	SAT64EL	EL	2012-03-15	-31.2355	29.9862	31	10409	37.4088	37.3067	1	2	964
64W53	SAT64EL	EL	2012-03-15	-31.2349	29.9865	31	10408	72.3423	-87.6619	1	2	965
64W53	SAT64EL	EL	2012-03-15	-31.2352	29.9874	31	10407	109.226	-50.5462	1	2	966
64W53	SAT64EL	EL	2012-03-15	-31.2458	29.9816	85	10401	113.044	-51.3566	1	2	967
64W53	SAT64EL	EL	2012-03-15	-31.2402	29.9861	15	10413	142.715	145.977	1	2	968
64W53	SAT64EL	EL	2012-03-15	-31.2403	29.9843	31	10412	181.164	-121.613	1	2	969
64W53	SAT64EL	EL	2012-03-15	-31.2368	29.988	31	10406	195.989	113.27	1	2	970
64W53	SAT64EL	EL	2012-03-15	-31.2357	29.9895	31	10405	203.779	-168.697	1	2	971
64W53	SAT64EL	EL	2012-03-15	-31.241	29.985	15	10414	270.422	30.7968	1	2	972
64W53	SAT64EL	EL	2012-03-15	-31.2382	29.9857	31	10411	296.359	25.2542	1	2	973
64W53	SAT64EL	EL	2012-03-15	-31.2356	29.9858	31	10410	309.281	-57.9595	1	2	974
64W53	SAT64EL	EL	2012-03-15	-31.2465	29.9809	85	10402	414.881	125.452	1	2	975
64W53	SAT64EL	EL	2012-03-15	-31.2487	29.9821	85	10418	510.475	-42.9776	1	2	976
64W53	SAT64EL	EL	2012-03-15	-31.2432	29.9798	31	10403	520.845	81.339	1	2	977
64W53	SAT64EL	EL	2012-03-15	-31.2414	29.9844	31	10404	869.145	-27.9467	1	2	978
64W53	SAT64EL	EL	2012-03-15	-31.2412	29.9824	31	10415	931.373	-80.7509	1	2	979
64W54	SAT64EL	EL	2012-03-19	-31.2424	29.9821	31	10609	2.60609	-8.79136	3	2	980
64W54	SAT64EL	EL	2012-03-20	-31.247	29.9818	85	10618	3.96958	44.9215	3	2	981
64W54	SAT64EL	EL	2012-03-20	-31.2469	29.9818	85	10619	6.91433	-150.444	3	2	982
64W54	SAT64EL	EL	2012-03-19	-31.2408	29.982	31	10604	11.7709	38.6095	3	2	983
64W54	SAT64EL	EL	2012-03-19	-31.2424	29.9821	31	10610	12.2499	76.8197	3	2	984
64W54	SAT64EL	EL	2012-03-19	-31.2423	29.9821	31	10611	14.4663	-91.1403	3	2	985
64W54	SAT64EL	EL	2012-03-19	-31.2409	29.9818	31	10606	15.6856	-66.8708	3	2	986
64W54	SAT64EL	EL	2012-03-19	-31.2425	29.9822	31	10608	21.6639	156.551	3	2	987
64W54	SAT64EL	EL	2012-03-19	-31.2407	29.982	31	10605	23.7902	-92.5402	3	2	988
64W54	SAT64EL	EL	2012-03-20	-31.2461	29.9809	31	10614	52.2874	-85.6623	3	2	989
64W54	SAT64EL	EL	2012-03-20	-31.2474	29.9823	85	10617	70.8406	-101.9	3	2	990
64W54	SAT64EL	EL	2012-03-19	-31.2423	29.9837	15	10600	84.8188	-999	3	2	991
64W54	SAT64EL	EL	2012-03-19	-31.2409	29.9832	31	10603	124.436	76.3451	3	2	992
64W54	SAT64EL	EL	2012-03-20	-31.2481	29.981	85	10616	158.272	-132.418	3	2	993
64W54	SAT64EL	EL	2012-03-19	-31.241	29.9819	31	10607	185.263	16.0461	3	2	994
64W54	SAT64EL	EL	2012-03-20	-31.2464	29.9813	85	10615	211.42	58.7773	3	2	995
64W54	SAT64EL	EL	2012-03-19	-31.2444	29.9824	31	10613	256.221	45.2996	3	2	996
64W54	SAT64EL	EL	2012-03-19	-31.2422	29.982	31	10612	263.81	-132.3	3	2	997
64W54	SAT64EL	EL	2012-03-19	-31.2385	29.9842	31	10602	308.187	-157.353	3	2	998
64W54	SAT64EL	EL	2012-03-19	-31.2424	29.9845	15	10601	472.456	-99.7622	3	2	999
64W55	SAT64	EL	2011-11-11	-31.2892	29.9605	84	4411	753.672	-12.735	1	2	1000
64W55	SAT64	EL	2011-11-11	-31.2945	29.9566	84	4412	466.978	0.42138	1	2	1001
64W55	SAT64	EL	2011-11-11	-31.2978	29.9543	32	4413	495.383	178.675	1	2	1002
64W55	SAT64	EL	2011-11-11	-31.2943	29.9567	84	4414	30.8514	-43.4398	1	2	1003
64W55	SAT64	EL	2011-11-11	-31.294	29.9566	84	4415	68.1993	113.117	1	2	1004
64W55	SAT64	EL	2011-11-11	-31.2941	29.9573	84	4416	4.08892	79.8446	1	2	1005
64W55	SAT64	EL	2011-11-11	-31.2942	29.9573	84	4417	5.55393	-111.6	1	2	1006
64W55	SAT64	EL	2011-11-11	-31.2941	29.9573	84	4418	7.1164	-175.097	1	2	1007
64W55	SAT64	EL	2011-11-11	-31.2942	29.9573	84	4419	181.582	33.3998	1	2	1008
64W55	SAT64	EL	2011-11-11	-31.2937	29.9556	55	4420	14.3317	-33.2823	1	2	1009
64W55	SAT64	EL	2011-11-11	-31.2938	29.9554	55	4421	302.964	22.6599	1	2	1010
64W55	SAT64	EL	2011-11-11	-31.2935	29.9525	32	4422	236.765	-88.1609	1	2	1011
64W55	SAT64	EL	2011-11-11	-31.2954	29.9522	32	4423	567.977	-105.624	1	2	1012
64W55	SAT64	EL	2011-11-11	-31.2948	29.9577	36	4424	402.119	90.3278	1	2	1013
64W55	SAT64	EL	2011-11-11	-31.2981	29.9582	36	4425	831.913	8.09143	1	2	1014
64W55	SAT64	EL	2011-11-11	-31.3051	29.9581	36	4426	190.57	1.89924	1	2	1015
64W55	SAT64	EL	2011-11-11	-31.3066	29.958	36	4427	755.555	168.085	1	2	1016
64W55	SAT64	EL	2011-11-11	-31.3004	29.9568	36	4428	128.484	5.47784	1	2	1017
64W55	SAT64	EL	2011-11-11	-31.2994	29.9567	36	4429	47.1343	-122.652	1	2	1018
64W55	SAT64	EL	2011-11-11	-31.2996	29.9564	36	4430	593.191	171.555	1	2	1019
64W55	SAT64	EL	2011-11-11	-31.2961	29.9604	36	4431	535.251	-22.1846	1	2	1020
64W56	SAT64	EL	2011-08-11	-31.302	29.9842	84	15	508.807	-2.14054	2	2	1021
64W56	SAT64	EL	2011-08-11	-31.3042	29.9884	84	16	344.46	2.10738	2	2	1022
64W56	SAT64	EL	2011-08-11	-31.3058	29.9911	84	17	67.2329	66.3004	2	2	1023
64W56	SAT64	EL	2011-08-11	-31.3064	29.991	84	18	103.272	23.1062	2	2	1024
64W56	SAT64	EL	2011-08-11	-31.3071	29.9905	84	19	1.7558	56.6278	2	2	1025
64W56	SAT64	EL	2011-08-11	-31.3071	29.9904	84	20	4.34039	113.862	2	2	1026
64W56	SAT64	EL	2011-08-11	-31.3071	29.9905	84	21	2.69519	-64.5131	2	2	1027
64W56	SAT64	EL	2011-08-11	-31.3071	29.9904	84	22	153.586	-156.962	2	2	1028
64W56	SAT64	EL	2011-08-11	-31.3083	29.9909	55	23	60.3519	-76.2715	2	2	1029
64W56	SAT64	EL	2011-08-11	-31.3082	29.9915	55	24	144.154	102.79	2	2	1030
64W56	SAT64	EL	2011-08-11	-31.3094	29.9913	55	25	46.1891	171.097	2	2	1031
64W56	SAT64	EL	2011-08-11	-31.309	29.9913	55	26	17.3548	-83.6343	2	2	1032
64W56	SAT64	EL	2011-08-11	-31.309	29.9911	55	27	166.087	16.384	2	2	1033
64W56	SAT64	EL	2011-08-11	-31.3085	29.9896	84	28	534.455	48.8405	2	2	1034
64W56	SAT64	EL	2011-08-11	-31.3043	29.988	84	29	39.0813	5.73463	2	2	1035
64W56	SAT64	EL	2011-08-11	-31.304	29.9879	84	30	2.04481	-167.329	2	2	1036
64W56	SAT64	EL	2011-08-11	-31.304	29.9879	84	31	134.623	-128.715	2	2	1037
64W56	SAT64	EL	2011-08-11	-31.3033	29.9889	84	32	340.332	-104.357	2	2	1038
64W56	SAT64	EL	2011-08-11	-31.3016	29.9863	84	33	328.948	8.55033	2	2	1039
64W56	SAT64	EL	2011-08-11	-31.2996	29.984	84	34	145.702	-24.4889	2	2	1040
64W56	SAT64	EL	2011-08-11	-31.2992	29.9827	84	35	214.586	-111.462	2	2	1041
64W57	SAT64	EL	2011-08-23	-31.2996	29.9807	84	611	6.58734	-71.006	3	2	1042
64W57	SAT64	EL	2011-08-23	-31.2995	29.9807	84	612	96.1725	-99.4741	3	2	1043
64W57	SAT64	EL	2011-08-23	-31.3002	29.9802	84	613	55.4769	35.4017	3	2	1044
64W57	SAT64	EL	2011-08-23	-31.3004	29.9797	84	614	408.907	-21.6403	3	2	1045
64W57	SAT64	EL	2011-08-23	-31.3029	29.977	84	615	14.9948	-109.019	3	2	1046
64W57	SAT64	EL	2011-08-23	-31.303	29.9772	84	616	4.00427	-52.3679	3	2	1047
64W57	SAT64	EL	2011-08-23	-31.303	29.9772	84	617	3.5115	-151.276	3	2	1048
64W57	SAT64	EL	2011-08-23	-31.303	29.9772	84	618	22.7378	-127.491	3	2	1049
64W57	SAT64	EL	2011-08-23	-31.3031	29.9773	84	619	9.16768	168.485	3	2	1050
64W57	SAT64	EL	2011-08-23	-31.3031	29.9773	84	620	0	-999	3	2	1051
64W57	SAT64	EL	2011-08-24	-31.3031	29.9773	84	621	81.3845	-999	3	2	1052
64W57	SAT64	EL	2011-08-24	-31.3037	29.9777	84	622	246.86	27.6998	3	2	1053
64W57	SAT64	EL	2011-08-24	-31.3057	29.9778	84	623	33.1849	-97.6356	3	2	1054
64W57	SAT64	EL	2011-08-24	-31.3056	29.9781	84	624	49.9186	-35.8476	3	2	1055
64W57	SAT64	EL	2011-08-24	-31.3054	29.9784	84	625	134.53	85.0323	3	2	1056
64W57	SAT64	EL	2011-08-24	-31.306	29.9794	84	626	9.57112	-96.0905	3	2	1057
64W57	SAT64	EL	2011-08-24	-31.306	29.9795	84	627	1.75571	57.3478	3	2	1058
64W57	SAT64	EL	2011-08-24	-31.306	29.9795	84	628	12.1467	-55.2719	3	2	1059
64W57	SAT64	EL	2011-08-24	-31.3059	29.9796	84	629	27.4254	-165.863	3	2	1060
64W57	SAT64	EL	2011-08-24	-31.306	29.9794	84	630	5.16384	-138.865	3	2	1061
64W57	SAT64	EL	2011-08-24	-31.306	29.9794	84	631	22.4025	-32.472	3	2	1062
64W58	SAT64	EL	2011-08-23	-31.2996	29.9807	84	15	508.807	-2.14054	2	2	1063
64W58	SAT64	EL	2011-08-23	-31.2995	29.9807	84	16	344.46	2.10738	2	2	1064
64W58	SAT64	EL	2011-08-23	-31.3002	29.9802	84	17	67.2329	66.3004	2	2	1065
64W58	SAT64	EL	2011-08-23	-31.3004	29.9797	84	18	103.272	23.1062	2	2	1066
64W58	SAT64	EL	2011-08-23	-31.3029	29.977	84	19	1.7558	56.6278	2	2	1067
64W58	SAT64	EL	2011-08-23	-31.303	29.9772	84	20	4.34039	113.862	2	2	1068
64W58	SAT64	EL	2011-08-23	-31.303	29.9772	84	21	2.69519	-64.5131	2	2	1069
64W58	SAT64	EL	2011-08-23	-31.303	29.9772	84	22	153.586	-156.962	2	2	1070
64W58	SAT64	EL	2011-08-23	-31.3031	29.9773	55	23	60.3519	-76.2715	2	2	1071
64W58	SAT64	EL	2011-08-23	-31.3031	29.9773	55	24	144.154	102.79	2	2	1072
64W58	SAT64	EL	2011-08-24	-31.3031	29.9773	55	25	46.1891	171.097	2	2	1073
64W58	SAT64	EL	2011-08-24	-31.3037	29.9777	55	26	17.3548	-83.6343	2	2	1074
64W58	SAT64	EL	2011-08-24	-31.3057	29.9778	55	27	166.087	16.384	2	2	1075
64W58	SAT64	EL	2011-08-24	-31.3056	29.9781	84	28	534.455	48.8405	2	2	1076
64W58	SAT64	EL	2011-08-24	-31.3054	29.9784	84	29	39.0813	5.73463	2	2	1077
64W58	SAT64	EL	2011-08-24	-31.306	29.9794	84	30	2.04481	-167.329	2	2	1078
64W58	SAT64	EL	2011-08-24	-31.306	29.9795	84	31	134.623	-128.715	2	2	1079
64W58	SAT64	EL	2011-08-24	-31.306	29.9795	84	32	340.332	-104.357	2	2	1080
64W58	SAT64	EL	2011-08-24	-31.3059	29.9796	84	33	328.948	8.55033	2	2	1081
64W58	SAT64	EL	2011-08-24	-31.306	29.9794	84	34	145.702	-24.4889	2	2	1082
64W58	SAT64	EL	2011-08-24	-31.306	29.9794	84	35	214.586	-111.462	2	2	1083
64W59	SAT64	EL	2011-08-30	-31.2999	29.9973	84	949	4.4509	66.7638	2	1	1084
64W59	SAT64	EL	2011-08-30	-31.2998	29.9973	84	950	193.75	-38.3681	2	1	1085
64W59	SAT64	EL	2011-08-30	-31.2991	29.9957	84	951	244.669	61.6033	2	1	1086
64W59	SAT64	EL	2011-08-30	-31.297	29.9957	84	952	74.5671	152.528	2	1	1087
64W59	SAT64	EL	2011-08-30	-31.2976	29.996	84	953	320.971	-10.6205	2	1	1088
64W59	SAT64	EL	2011-08-30	-31.2997	29.9979	84	954	122.191	-61.3118	2	1	1089
64W59	SAT64	EL	2011-08-31	-31.2995	29.9991	84	955	40.9044	-23.3534	2	1	1090
64W59	SAT64	EL	2011-08-31	-31.2993	29.9994	84	956	5.51183	-126.803	2	1	1091
64W59	SAT64	EL	2011-08-31	-31.2993	29.9993	84	957	10.256	59.7042	2	1	1092
64W59	SAT64	EL	2011-08-31	-31.2992	29.9993	84	958	26.1557	-166.518	2	1	1093
64W59	SAT64	EL	2011-08-31	-31.2995	29.9993	84	959	2.69551	37.0302	2	1	1094
64W59	SAT64	EL	2011-08-31	-31.2995	29.9993	84	960	0	-999	2	1	1095
64W59	SAT64	EL	2011-08-31	-31.2995	29.9993	84	961	3.97514	-999	2	1	1096
64W59	SAT64	EL	2011-08-31	-31.2995	29.9993	84	962	55.1518	15.6177	2	1	1097
64W59	SAT64	EL	2011-08-31	-31.2991	29.9989	84	963	34.6698	73.2627	2	1	1098
64W59	SAT64	EL	2011-08-31	-31.2989	29.9991	84	964	8.57378	60.1593	2	1	1099
64W59	SAT64	EL	2011-08-31	-31.2989	29.9992	84	965	3.40885	-180	2	1	1100
64W59	SAT64	EL	2011-08-31	-31.2989	29.9991	84	966	200.623	-98.3771	2	1	1101
64W59	SAT64	EL	2011-08-31	-31.3005	29.9994	84	967	436.696	37.1216	2	1	1102
64W59	SAT64	EL	2011-08-31	-31.3037	29.9974	84	968	458.076	93.5212	2	1	1103
64W59	SAT64	EL	2011-08-31	-31.3017	29.9936	84	969	251.447	-22.6302	2	1	1104
64W6	SAT64EL	EL	2011-09-01	-31.2914	30.0106	84	1003	0	-999	2	1	1105
64W6	SAT64EL	EL	2011-09-01	-31.2914	30.0106	84	1005	0	-999	2	1	1106
64W6	SAT64EL	EL	2011-09-01	-31.2899	30.0098	84	1012	0	-999	2	1	1107
64W6	SAT64EL	EL	2011-09-01	-31.2914	30.0106	84	1004	1.75636	-999	2	1	1108
64W6	SAT64EL	EL	2011-08-31	-31.2914	30.0107	84	1002	1.75636	64.919	2	1	1109
64W6	SAT64EL	EL	2011-09-01	-31.2963	29.9928	84	1019	12.0858	-165.491	2	1	1110
64W6	SAT64EL	EL	2011-09-01	-31.2897	30.0098	84	1011	20.167	24.51	2	1	1111
64W6	SAT64EL	EL	2011-09-01	-31.2899	30.0098	84	1013	44.3779	-999	2	1	1112
64W6	SAT64EL	EL	2011-08-31	-31.291	30.0109	84	1001	48.7474	-36.7749	2	1	1113
64W6	SAT64EL	EL	2011-09-01	-31.2901	30.0095	84	1014	69.581	-62.2183	2	1	1114
64W6	SAT64EL	EL	2011-08-31	-31.2907	30.0115	55	1000	72.1776	-999	1	2	1115
64W6	SAT64EL	EL	2011-09-01	-31.2891	30.0108	55	1008	82.2466	-102.437	2	1	1116
64W6	SAT64EL	EL	2011-09-01	-31.2893	30.01	84	1009	87.2306	42.8641	2	1	1117
64W6	SAT64EL	EL	2011-09-01	-31.289	30.0093	84	1010	101.321	-146.844	2	1	1118
64W6	SAT64EL	EL	2011-09-01	-31.2902	30.0109	84	1007	126.502	-13.3769	2	1	1119
64W6	SAT64EL	EL	2011-09-01	-31.2914	30.0106	84	1006	144.643	-999	2	1	1120
64W6	SAT64EL	EL	2011-09-01	-31.2967	29.991	84	1018	192.06	-134.516	2	1	1121
64W6	SAT64EL	EL	2011-09-01	-31.2948	29.9922	84	1017	261.701	-47.737	2	1	1122
64W6	SAT64EL	EL	2011-09-01	-31.2907	30.0096	84	1015	427.741	75.2568	2	1	1123
64W6	SAT64EL	EL	2011-09-01	-31.2922	30.0059	84	1016	1444.72	13.8683	2	1	1124
64W60	SAT64	EL	2011-09-06	-31.2922	29.96	84	1253	194.075	66.1385	1	2	1125
64W60	SAT64	EL	2011-09-06	-31.2915	29.9583	84	1254	269.243	-168.187	1	2	1126
64W60	SAT64	EL	2011-09-06	-31.2929	29.9604	36	1255	618.542	22.89	1	2	1127
64W60	SAT64	EL	2011-09-06	-31.2974	29.9633	36	1256	386.498	36.889	1	2	1128
64W60	SAT64	EL	2011-09-06	-31.3005	29.9628	36	1257	357.817	131.207	1	2	1129
64W60	SAT64	EL	2011-09-06	-31.2983	29.9605	36	1258	131.327	105.604	1	2	1130
64W60	SAT64	EL	2011-09-06	-31.2978	29.9616	36	1259	131.951	7.53858	1	2	1131
64W60	SAT64	EL	2011-09-06	-31.2975	29.9629	36	1260	88.6054	-154.476	1	2	1132
64W60	SAT64	EL	2011-09-06	-31.2974	29.962	36	1261	344.329	-124.845	1	2	1133
64W60	SAT64	EL	2011-09-06	-31.2999	29.9635	36	1262	62.3448	-12.4547	1	2	1134
64W60	SAT64	EL	2011-09-06	-31.3003	29.9639	36	1263	5.23131	-99.8454	1	2	1135
64W60	SAT64	EL	2011-09-06	-31.3003	29.964	36	1264	356.243	-26.0958	1	2	1136
64W60	SAT64	EL	2011-09-06	-31.2974	29.9648	36	1265	638.096	31.7348	1	2	1137
64W60	SAT64	EL	2011-09-06	-31.2938	29.9693	36	1266	400.184	-160.531	1	2	1138
64W60	SAT64	EL	2011-09-06	-31.2951	29.9657	36	1267	384.084	-15.324	1	2	1139
64W60	SAT64	EL	2011-09-06	-31.2972	29.9629	36	1268	108.9	-135.18	1	2	1140
64W60	SAT64	EL	2011-09-06	-31.2972	29.9639	36	1269	173.515	95.5834	1	2	1141
64W60	SAT64	EL	2011-09-06	-31.2987	29.9636	36	1270	408.091	101.683	1	2	1142
64W60	SAT64	EL	2011-09-06	-31.2974	29.96	36	1271	187.193	-97.0395	1	2	1143
64W60	SAT64	EL	2011-09-06	-31.2989	29.9595	36	1272	21.1744	124.071	1	2	1144
64W60	SAT64	EL	2011-09-06	-31.2987	29.9594	36	1273	197.227	57.7135	1	2	1145
64W61	SAT64	EL	2011-09-13	-31.3065	29.9749	36	1591	355.279	-78.4142	2	2	1146
64W61	SAT64	EL	2011-09-13	-31.3049	29.972	36	1592	421.379	60.5693	2	2	1147
64W61	SAT64	EL	2011-09-13	-31.3014	29.9722	36	1593	98.1145	43.3826	2	2	1148
64W61	SAT64	EL	2011-09-13	-31.3009	29.9729	36	1594	206.372	-178.052	2	2	1149
64W61	SAT64	EL	2011-09-13	-31.302	29.9714	36	1595	375.069	112.219	2	2	1150
64W61	SAT64	EL	2011-09-13	-31.2991	29.9701	36	1596	443.558	50.1673	2	2	1151
64W61	SAT64	EL	2011-09-13	-31.2959	29.9723	36	1597	203.376	-152.462	2	2	1152
64W61	SAT64	EL	2011-09-13	-31.2968	29.9706	36	1598	408.875	-22.3234	2	2	1153
64W61	SAT64	EL	2011-09-13	-31.2995	29.9683	36	1599	448.97	144.269	2	2	1154
64W61	SAT64	EL	2011-09-13	-31.2958	29.9683	36	1600	210.626	144.165	2	2	1155
64W61	SAT64	EL	2011-09-13	-31.2972	29.9695	36	1601	2.62889	-2.90013	2	2	1156
64W61	SAT64	EL	2011-09-13	-31.2972	29.9695	36	1602	6.51315	-88.5986	2	2	1157
64W61	SAT64	EL	2011-09-13	-31.2972	29.9696	36	1603	410.202	-145.533	2	2	1158
64W61	SAT64	EL	2011-09-13	-31.2974	29.9656	36	1604	591.681	130.306	2	2	1159
64W61	SAT64	EL	2011-09-13	-31.2935	29.9691	36	1605	413.683	4.52176	2	2	1160
64W61	SAT64	EL	2011-09-13	-31.2909	29.9718	36	1606	217.811	125.454	2	2	1161
64W61	SAT64	EL	2011-09-13	-31.2927	29.9722	36	1607	399.828	48.9538	2	2	1162
64W61	SAT64	EL	2011-09-13	-31.2954	29.9699	36	1608	174.357	63.1285	2	2	1163
64W61	SAT64	EL	2011-09-13	-31.2951	29.9683	36	1609	464.647	-28.4348	2	2	1164
64W61	SAT64	EL	2011-09-13	-31.2964	29.964	36	1610	304.268	-26.7625	2	2	1165
64W61	SAT64	EL	2011-09-13	-31.2982	29.962	36	1611	580.039	-138.457	2	2	1166
64W62	SAT64	EL	2011-09-17	-31.293	30.0092	84	1811	5.16563	-49.3451	1	2	1167
64W62	SAT64	EL	2011-09-17	-31.293	30.0092	84	1812	120.49	-166.489	1	2	1168
64W62	SAT64	EL	2011-09-17	-31.2927	30.0081	84	1813	207.696	-22.9798	1	2	1169
64W62	SAT64	EL	2011-09-17	-31.293	30.0061	84	1814	160.823	-3.50088	1	2	1170
64W62	SAT64	EL	2011-09-17	-31.2933	30.0046	84	1815	151.665	-49.3063	1	2	1171
64W62	SAT64	EL	2011-09-17	-31.2944	30.0039	84	1816	22.6122	165.48	1	2	1172
64W62	SAT64	EL	2011-09-18	-31.2943	30.0039	84	1817	3.97552	45.8362	1	2	1173
64W62	SAT64	EL	2011-09-18	-31.2942	30.004	84	1818	67.1501	30.9582	1	2	1174
64W62	SAT64	EL	2011-09-18	-31.2942	30.0046	84	1819	105.986	68.0208	1	2	1175
64W62	SAT64	EL	2011-09-18	-31.295	30.005	84	1820	174.436	-72.6476	1	2	1176
64W62	SAT64	EL	2011-09-18	-31.2949	30.0067	84	1821	159.447	-38.1392	1	2	1177
64W62	SAT64	EL	2011-09-18	-31.294	30.0078	84	1822	587.387	-76.3431	1	2	1178
64W62	SAT64	EL	2011-09-18	-31.2898	30.0051	55	1823	226.357	-17.1925	1	2	1179
64W62	SAT64	EL	2011-09-18	-31.2885	30.0035	55	1824	182.357	5.64172	1	2	1180
64W62	SAT64	EL	2011-09-18	-31.2873	30.0023	3	1825	58.1403	-165.718	1	2	1181
64W62	SAT64	EL	2011-09-18	-31.2877	30.0026	3	1826	9.1702	-22.6366	1	2	1182
64W62	SAT64	EL	2011-09-18	-31.2878	30.0026	3	1827	397.82	80.6001	1	2	1183
64W62	SAT64	EL	2011-09-18	-31.2906	30.0006	3	1828	156.935	54.7627	1	2	1184
64W62	SAT64	EL	2011-09-18	-31.2907	29.9991	3	1829	188.206	-8.043	1	2	1185
64W62	SAT64	EL	2011-09-18	-31.291	29.9973	3	1830	173.373	-139.253	1	2	1186
64W62	SAT64	EL	2011-09-18	-31.2917	29.9988	3	1831	159.982	171.5	1	2	1187
64W63	SAT64	EL	2011-09-25	-31.2779	30.0116	27	2161	435.76	-13.5403	3	2	1188
64W63	SAT64	EL	2011-09-25	-31.2808	30.0092	27	2162	60.1372	-165.716	3	2	1189
64W63	SAT64	EL	2011-09-25	-31.2804	30.0096	27	2163	224.384	-87.9779	3	2	1190
64W63	SAT64	EL	2011-09-25	-31.279	30.0083	27	2164	258.763	178.099	3	2	1191
64W63	SAT64	EL	2011-09-25	-31.2806	30.0099	27	2165	131.499	-121.683	3	2	1192
64W63	SAT64	EL	2011-09-25	-31.2796	30.0103	27	2166	133.362	145.186	3	2	1193
64W63	SAT64	EL	2011-09-25	-31.2807	30.0106	27	2167	87.2746	-88.9586	3	2	1194
64W63	SAT64	EL	2011-09-25	-31.2805	30.0114	27	2168	182.92	-107.762	3	2	1195
64W63	SAT64	EL	2011-09-25	-31.2792	30.0105	27	2169	21.5237	138.683	3	2	1196
64W63	SAT64	EL	2011-09-25	-31.2793	30.0107	27	2170	55.4176	53.8215	3	2	1197
64W63	SAT64	EL	2011-09-25	-31.2797	30.0109	27	2171	391.105	-32.0813	3	2	1198
64W63	SAT64	EL	2011-09-25	-31.2817	30.0139	3	2172	260.191	-118.456	3	2	1199
64W63	SAT64	EL	2011-09-25	-31.2796	30.0143	3	2173	114.014	-120.083	3	2	1200
64W63	SAT64	EL	2011-09-25	-31.2799	30.0132	3	2174	33.068	-44.8701	3	2	1201
64W63	SAT64	EL	2011-09-25	-31.2801	30.0131	3	2175	70.4039	-58.76	3	2	1202
64W63	SAT64	EL	2011-09-25	-31.2806	30.0135	3	2176	352.755	-82.4873	3	2	1203
64W63	SAT64	EL	2011-09-25	-31.2793	30.0165	3	2177	354.898	-161.437	3	2	1204
64W63	SAT64	EL	2011-09-25	-31.2797	30.0131	27	2178	316.443	-41.9103	3	2	1205
64W63	SAT64	EL	2011-09-25	-31.2817	30.0112	3	2179	387.816	-132.328	3	2	1206
64W63	SAT64	EL	2011-09-25	-31.2816	30.0149	3	2180	184.299	151.627	3	2	1207
64W63	SAT64	EL	2011-09-25	-31.2824	30.0134	3	2181	122.213	11.5431	3	2	1208
64W64	SAT64	EL	2011-10-10	-31.2806	30.0088	27	2891	260.202	157.421	3	1	1209
64W64	SAT64	EL	2011-10-10	-31.2792	30.0107	27	2892	52.0426	117.859	3	1	1210
64W64	SAT64	EL	2011-10-10	-31.2796	30.0108	27	2893	58.6201	103.547	3	1	1211
64W64	SAT64	EL	2011-10-10	-31.2796	30.0102	27	2894	12.158	100.19	3	1	1212
64W64	SAT64	EL	2011-10-10	-31.2795	30.0103	27	2895	136.922	74.9812	3	1	1213
64W64	SAT64	EL	2011-10-10	-31.2794	30.0116	27	2896	234.467	4.27107	3	1	1214
64W64	SAT64	EL	2011-10-10	-31.2793	30.0139	3	2897	239.692	-53.4706	3	1	1215
64W64	SAT64	EL	2011-10-10	-31.2776	30.0151	3	2898	387.891	-171.297	3	1	1216
64W64	SAT64	EL	2011-10-10	-31.28	30.0126	27	2899	114.928	-36.7522	3	1	1217
64W64	SAT64	EL	2011-10-10	-31.2809	30.0125	3	2900	525.963	68.2467	3	1	1218
64W64	SAT64	EL	2011-10-10	-31.2821	30.0076	3	2901	6.23817	-58.9195	3	1	1219
64W64	SAT64	EL	2011-10-10	-31.2822	30.0076	3	2902	310.48	119.381	3	1	1220
64W64	SAT64	EL	2011-10-10	-31.2803	30.0054	27	2903	447.252	-106.243	3	1	1221
64W64	SAT64	EL	2011-10-10	-31.2836	30.0034	3	2904	213.204	-42.9885	3	1	1222
64W64	SAT64	EL	2011-10-10	-31.2853	30.0039	55	2905	335.573	42.3049	3	1	1223
64W64	SAT64	EL	2011-10-10	-31.2878	30.0024	3	2906	230.885	160.305	3	1	1224
64W64	SAT64	EL	2011-10-10	-31.2859	30.0027	3	2907	15.6395	-33.9788	3	1	1225
64W64	SAT64	EL	2011-10-10	-31.2858	30.0026	3	2908	19.0049	110.036	3	1	1226
64W64	SAT64	EL	2011-10-10	-31.2858	30.0028	55	2909	4.45132	-60.9464	3	1	1227
64W64	SAT64	EL	2011-10-10	-31.2857	30.0028	55	2910	28.9053	33.1505	3	1	1228
64W64	SAT64	EL	2011-10-10	-31.2856	30.0031	55	2911	42.1059	-157.427	3	1	1229
64W65	SAT64	EL	2011-10-18	-31.244	29.9702	31	3271	0	-999	1	2	1230
64W65	SAT64	EL	2011-10-18	-31.244	29.9702	31	3272	530.985	-999	1	2	1231
64W65	SAT64	EL	2011-10-18	-31.2434	29.9753	31	3273	40.0939	99.4491	1	2	1232
64W65	SAT64	EL	2011-10-18	-31.2438	29.9753	31	3274	453.588	-5.1227	1	2	1233
64W65	SAT64	EL	2011-10-18	-31.2476	29.9755	31	3275	174.087	-88.6943	1	2	1234
64W65	SAT64	EL	2011-10-18	-31.2475	29.9772	31	3276	64.3844	-132.852	1	2	1235
64W65	SAT64	EL	2011-10-18	-31.2471	29.9767	31	3277	63.1662	-34.8637	1	2	1236
64W65	SAT64	EL	2011-10-18	-31.247	29.9761	31	3278	5.55738	-169.388	1	2	1237
64W65	SAT64	EL	2011-10-18	-31.2471	29.9762	31	3279	191.652	137.564	1	2	1238
64W65	SAT64	EL	2011-10-18	-31.2476	29.9745	31	3280	323.66	54.7249	1	2	1239
64W65	SAT64	EL	2011-10-18	-31.2461	29.9718	31	3281	120.331	-125.504	1	2	1240
64W65	SAT64	EL	2011-10-18	-31.2471	29.9719	31	3282	289.298	5.37307	1	2	1241
64W65	SAT64	EL	2011-10-18	-31.2495	29.9717	31	3283	781.612	-44.1264	1	2	1242
64W65	SAT64	EL	2011-10-18	-31.2545	29.9766	10	3284	394.052	59.2495	1	2	1243
64W65	SAT64	EL	2011-10-18	-31.2576	29.9754	17	3285	508.156	41.326	1	2	1244
64W65	SAT64	EL	2011-10-18	-31.2597	29.9711	17	3286	16.6254	51.0125	1	2	1245
64W65	SAT64	EL	2011-10-18	-31.2596	29.9709	17	3287	403.703	-33.525	1	2	1246
64W65	SAT64	EL	2011-10-18	-31.2603	29.9671	22	3288	120.377	25.778	1	2	1247
64W65	SAT64	EL	2011-10-18	-31.2601	29.966	22	3289	21.7172	-137.287	1	2	1248
64W65	SAT64	EL	2011-10-18	-31.2602	29.9661	22	3290	2.62942	-5.13178	1	2	1249
64W65	SAT64	EL	2011-10-18	-31.2603	29.9661	22	3291	2.62942	180	1	2	1250
64W66	SAT64	EL	2011-10-25	-31.3059	29.9905	84	3591	87.5996	0.651398	1	2	1251
64W66	SAT64	EL	2011-10-25	-31.3052	29.9907	84	3592	5.16426	73.9834	1	2	1252
64W66	SAT64	EL	2011-10-25	-31.3052	29.9908	84	3593	4.34043	113.863	1	2	1253
64W66	SAT64	EL	2011-10-25	-31.3052	29.9907	84	3594	86.6193	14.1968	1	2	1254
64W66	SAT64	EL	2011-10-25	-31.3058	29.9902	84	3595	418.113	35.5125	1	2	1255
64W66	SAT64	EL	2011-10-25	-31.3068	29.9864	84	3596	480.373	-87.0365	1	2	1256
64W66	SAT64	EL	2011-10-25	-31.3107	29.9874	84	3597	564.155	90.9528	1	2	1257
64W66	SAT64	EL	2011-10-25	-31.3117	29.9821	84	3598	489.455	-48.2248	1	2	1258
64W66	SAT64	EL	2011-10-25	-31.3152	29.9798	84	3599	854.497	112.1	1	2	1259
64W66	SAT64	EL	2011-10-25	-31.3097	29.9746	36	3600	285.588	33.775	1	2	1260
64W66	SAT64	EL	2011-10-25	-31.3073	29.9744	36	3601	484.96	-89.4158	1	2	1261
64W66	SAT64	EL	2011-10-25	-31.3076	29.9697	36	3602	394.31	55.3213	1	2	1262
64W66	SAT64	EL	2011-10-25	-31.3051	29.9673	36	3603	172.214	114.794	1	2	1263
64W66	SAT64	EL	2011-10-25	-31.3047	29.9689	36	3604	77.8597	20.0001	1	2	1264
64W66	SAT64	EL	2011-10-25	-31.3048	29.9697	36	3605	152.326	-19.5525	1	2	1265
64W66	SAT64	EL	2011-10-25	-31.3045	29.9711	36	3606	589.818	-78.6362	1	2	1266
64W66	SAT64	EL	2011-10-25	-31.2996	29.9709	36	3607	367.027	0.449747	1	2	1267
64W66	SAT64	EL	2011-10-25	-31.2965	29.9707	36	3608	76.6831	114.971	1	2	1268
64W66	SAT64	EL	2011-10-25	-31.2968	29.9714	36	3609	104.028	51.5437	1	2	1269
64W66	SAT64	EL	2011-10-25	-31.2976	29.9717	36	3610	9.16776	146.363	1	2	1270
64W66	SAT64	EL	2011-10-25	-31.2976	29.9716	36	3611	462.315	-89.2018	1	2	1271
64W67	SAT64	EL	2011-11-01	-31.3063	29.9732	84	3961	214.712	178.554	1	2	1272
64W67	SAT64	EL	2011-11-01	-31.3067	29.9752	36	3962	39.2669	99.1999	1	2	1273
64W67	SAT64	EL	2011-11-01	-31.307	29.9751	36	3963	59.2614	-41.8318	1	2	1274
64W67	SAT64	EL	2011-11-01	-31.3075	29.9752	36	3964	26.4737	157.945	1	2	1275
64W67	SAT64	EL	2011-11-01	-31.3073	29.9751	36	3965	13.8385	130.65	1	2	1276
64W67	SAT64	EL	2011-11-01	-31.3073	29.9752	36	3966	13.3164	130.652	1	2	1277
64W67	SAT64	EL	2011-11-01	-31.3074	29.9751	36	3967	3.969	-40.6507	1	2	1278
64W67	SAT64	EL	2011-11-01	-31.3074	29.9751	36	3968	8.24734	-167.709	1	2	1279
64W67	SAT64	EL	2011-11-01	-31.3074	29.9751	36	3969	7.938	-12.2908	1	2	1280
64W67	SAT64	EL	2011-11-02	-31.3073	29.9751	36	3970	10.6214	40.6507	1	2	1281
64W67	SAT64	EL	2011-11-02	-31.3072	29.9752	36	3971	10.5822	158.728	1	2	1282
64W67	SAT64	EL	2011-11-02	-31.3073	29.9752	36	3972	5.51052	91.0598	1	2	1283
64W67	SAT64	EL	2011-11-02	-31.3073	29.9751	36	3973	7.21507	143.098	1	2	1284
64W67	SAT64	EL	2011-11-02	-31.3073	29.9752	36	3974	26.4617	-131.412	1	2	1285
64W67	SAT64	EL	2011-11-02	-31.3072	29.975	36	3975	7.11609	-48.8241	1	2	1286
64W67	SAT64	EL	2011-11-02	-31.3072	29.9749	36	3976	3.969	106.699	1	2	1287
64W67	SAT64	EL	2011-11-02	-31.3072	29.9749	36	3977	3.969	180	1	2	1288
64W67	SAT64	EL	2011-11-02	-31.3072	29.9749	36	3978	139.756	71.5873	1	2	1289
64W67	SAT64	EL	2011-11-02	-31.3076	29.9736	36	3979	445.127	28.0061	1	2	1290
64W67	SAT64	EL	2011-11-02	-31.307	29.9694	36	3980	271.973	-8.33185	1	2	1291
64W67	SAT64	EL	2011-11-02	-31.3069	29.9668	36	3981	451.567	123.079	1	2	1292
64W68	SAT64	EL	2011-11-10	-31.3051	29.9575	36	4361	543.738	-6.3712	3	2	1293
64W68	SAT64	EL	2011-11-10	-31.3008	29.9594	36	4362	480.774	-105.061	3	2	1294
64W68	SAT64	EL	2011-11-10	-31.3004	29.9547	36	4363	76.3077	111.36	3	2	1295
64W68	SAT64	EL	2011-11-10	-31.2999	29.9551	36	4364	698.947	101.818	3	2	1296
64W68	SAT64	EL	2011-11-10	-31.3035	29.9603	36	4365	927.084	-124.004	3	2	1297
64W68	SAT64	EL	2011-11-10	-31.2958	29.9611	36	4366	381.444	-15.3428	3	2	1298
64W68	SAT64	EL	2011-11-10	-31.2927	29.9604	84	4367	120.249	79.1216	3	2	1299
64W68	SAT64	EL	2011-11-10	-31.2923	29.9615	84	4368	12.1541	103.229	3	2	1300
64W68	SAT64	EL	2011-11-10	-31.2924	29.9615	84	4369	8.81296	84.8909	3	2	1301
64W68	SAT64	EL	2011-11-10	-31.2924	29.9614	84	4370	111.067	150.145	3	2	1302
64W68	SAT64	EL	2011-11-10	-31.2918	29.9622	84	4371	194.327	-19.29	3	2	1303
64W68	SAT64	EL	2011-11-10	-31.2904	29.9631	84	4372	170.07	76.2219	3	2	1304
64W68	SAT64	EL	2011-11-10	-31.2907	29.9647	84	4373	130.644	-4.87075	3	2	1305
64W68	SAT64	EL	2011-11-10	-31.2909	29.9659	36	4374	248.69	79.6409	3	2	1306
64W68	SAT64	EL	2011-11-10	-31.293	29.966	36	4375	2.6289	142.623	3	2	1307
64W68	SAT64	EL	2011-11-10	-31.2929	29.966	36	4376	5.5111	-30.6166	3	2	1308
64W68	SAT64	EL	2011-11-10	-31.2929	29.9659	36	4377	75.2672	-52.5839	3	2	1309
64W68	SAT64	EL	2011-11-10	-31.2933	29.9653	36	4378	234.901	89.7961	3	2	1310
64W68	SAT64	EL	2011-11-10	-31.2916	29.9641	36	4379	34.7117	21.0249	3	2	1311
64W68	SAT64	EL	2011-11-10	-31.2913	29.964	84	4380	6.23632	175.959	3	2	1312
64W68	SAT64	EL	2011-11-10	-31.2914	29.964	84	4381	287.632	-153.935	3	2	1313
64W69	SAT64	EL	2011-11-17	-31.3065	29.9805	84	4711	29.405	-100.352	2	2	1314
64W69	SAT64	EL	2011-11-17	-31.3066	29.9807	84	4712	545.511	-72.5819	2	2	1315
64W69	SAT64	EL	2011-11-17	-31.3034	29.9845	84	4713	110.117	44.9926	2	2	1316
64W69	SAT64	EL	2011-11-17	-31.3034	29.9856	84	4714	45.4946	66.7202	2	2	1317
64W69	SAT64	EL	2011-11-17	-31.3038	29.9857	84	4715	10.5492	-138.87	2	2	1318
64W69	SAT64	EL	2011-11-17	-31.3037	29.9858	84	4716	614.473	-92.7499	2	2	1319
64W69	SAT64	EL	2011-11-17	-31.3023	29.9801	84	4717	156.678	-16.1058	2	2	1320
64W69	SAT64	EL	2011-11-17	-31.3023	29.9785	84	4718	146.874	-85.28	2	2	1321
64W69	SAT64	EL	2011-11-17	-31.3035	29.9784	84	4719	1279.2	-22.0962	2	2	1322
64W69	SAT64	EL	2011-11-17	-31.3136	29.9821	84	4720	135.181	32.8916	2	2	1323
64W69	SAT64	EL	2011-11-17	-31.3147	29.9818	84	4721	196.42	-138.24	2	2	1324
64W69	SAT64	EL	2011-11-17	-31.3138	29.9834	84	4722	53.6882	-26.3649	2	2	1325
64W69	SAT64	EL	2011-11-17	-31.3135	29.9837	84	4723	48.227	-120.904	2	2	1326
64W69	SAT64	EL	2011-11-17	-31.3135	29.9832	84	4724	72.7794	-26.0785	2	2	1327
64W69	SAT64	EL	2011-11-17	-31.3137	29.9825	84	4725	106.217	53.0106	2	2	1328
64W69	SAT64	EL	2011-11-17	-31.3133	29.9816	84	4726	30.1838	106.246	2	2	1329
64W69	SAT64	EL	2011-11-17	-31.3132	29.9818	84	4727	34.3118	-22.5599	2	2	1330
64W69	SAT64	EL	2011-11-17	-31.3129	29.982	84	4728	6.91225	129.842	2	2	1331
64W69	SAT64	EL	2011-11-17	-31.3129	29.982	84	4729	22.6565	129.628	2	2	1332
64W69	SAT64	EL	2011-11-17	-31.3129	29.9818	84	4730	14.2968	-173.971	2	2	1333
64W69	SAT64	EL	2011-11-17	-31.3129	29.9819	84	4731	2.60487	-148.491	2	2	1334
64W7	SAT64EL	EL	2011-09-05	-31.2984	29.9826	84	1205	0	-999	1	1	1335
64W7	SAT64EL	EL	2011-09-05	-31.2984	29.9826	84	1204	1.65262	23.4855	1	1	1336
64W7	SAT64EL	EL	2011-09-05	-31.2982	29.9825	84	1200	9.44721	-999	1	1	1337
64W7	SAT64EL	EL	2011-09-05	-31.2982	29.9825	84	1201	11.24	92.5098	1	1	1338
64W7	SAT64EL	EL	2011-09-05	-31.2984	29.9827	84	1203	15.0909	124.391	1	1	1339
64W7	SAT64EL	EL	2011-09-05	-31.2934	29.9772	36	1212	15.9268	-23.8232	1	1	1340
64W7	SAT64EL	EL	2011-09-05	-31.2927	29.9758	36	1218	16.8097	157.111	1	1	1341
64W7	SAT64EL	EL	2011-09-05	-31.2938	29.9766	36	1209	20.154	-46.2511	1	1	1342
64W7	SAT64EL	EL	2011-09-05	-31.2925	29.9758	36	1217	20.1628	-71.2513	1	1	1343
64W7	SAT64EL	EL	2011-09-05	-31.2983	29.9825	84	1202	26.4652	-85.2301	1	1	1344
64W7	SAT64EL	EL	2011-09-05	-31.2929	29.9817	17	1214	94.0494	-101.522	1	1	1345
64W7	SAT64EL	EL	2011-09-05	-31.2926	29.9758	36	1219	109.721	-111.832	1	1	1346
64W7	SAT64EL	EL	2011-09-05	-31.2922	29.9814	17	1215	112.601	36.3493	1	1	1347
64W7	SAT64EL	EL	2011-09-05	-31.2925	29.9764	36	1211	138.325	149.71	1	1	1348
64W7	SAT64EL	EL	2011-09-05	-31.2928	29.9776	36	1208	166.017	-96.7109	1	1	1349
64W7	SAT64EL	EL	2011-09-05	-31.294	29.9766	36	1210	179.192	179.212	1	1	1350
64W7	SAT64EL	EL	2011-09-05	-31.2945	29.9794	36	1207	276.776	-7.22525	1	1	1351
64W7	SAT64EL	EL	2011-09-05	-31.2935	29.9773	36	1213	456.52	-39.2459	1	1	1352
64W7	SAT64EL	EL	2011-09-05	-31.2984	29.9826	84	1206	574.144	-999	1	1	1353
64W7	SAT64EL	EL	2011-09-05	-31.2913	29.9817	17	1216	623.814	-119.73	1	1	1354
64W70	SAT64	EL	2011-11-24	-31.2712	30.0266	33	5031	1014.77	11.6786	3	2	1355
64W70	SAT64	EL	2011-11-24	-31.2664	30.0347	55	5032	714.657	-20.9064	3	2	1356
64W70	SAT64	EL	2011-11-24	-31.2615	30.0387	55	5033	128.558	-30.8544	3	2	1357
64W70	SAT64	EL	2011-11-24	-31.2605	30.0388	55	5034	1012.79	-80.0856	3	2	1358
64W70	SAT64	EL	2011-11-24	-31.2585	30.0292	34	5035	497.644	68.6953	3	2	1359
64W70	SAT64	EL	2011-11-24	-31.2544	30.0286	34	5036	2.60667	-130.055	3	2	1360
64W70	SAT64	EL	2011-11-24	-31.2544	30.0286	34	5037	72.5425	179.329	3	2	1361
64W70	SAT64	EL	2011-11-24	-31.2539	30.0291	34	5038	360.385	82.492	3	2	1362
64W70	SAT64	EL	2011-11-24	-31.2556	30.0319	34	5039	53.6652	86.6141	3	2	1363
64W70	SAT64	EL	2011-11-24	-31.256	30.0317	34	5040	168.964	-69.2557	3	2	1364
64W70	SAT64	EL	2011-11-24	-31.2571	30.0327	34	5041	441.804	59.2091	3	2	1365
64W70	SAT64	EL	2011-11-24	-31.2605	30.0312	34	5042	206.492	7.1001	3	2	1366
64W70	SAT64	EL	2011-11-24	-31.262	30.0302	34	5043	793.38	164.798	3	2	1367
64W70	SAT64	EL	2011-11-24	-31.2556	30.0319	34	5044	542.385	90.1432	3	2	1368
64W70	SAT64	EL	2011-11-24	-31.2566	30.037	34	5045	8.58028	167.184	3	2	1369
64W70	SAT64	EL	2011-11-24	-31.2566	30.037	34	5046	474.052	-178.064	3	2	1370
64W70	SAT64	EL	2011-11-24	-31.2568	30.0415	55	5047	22.0908	83.5048	3	2	1371
64W70	SAT64	EL	2011-11-24	-31.2569	30.0416	55	5048	53.8872	169.78	3	2	1372
64W70	SAT64	EL	2011-11-24	-31.2565	30.0414	55	5049	33.2549	29.7353	3	2	1373
64W70	SAT64	EL	2011-11-24	-31.2562	30.0415	55	5050	19.1541	-162.288	3	2	1374
64W70	SAT64	EL	2011-11-24	-31.2564	30.0414	55	5051	53.604	-127.043	3	2	1375
64W71	SAT64	EL	2011-12-02	-31.2538	30.04	34	5411	7.98421	150.175	2	2	1376
64W71	SAT64	EL	2011-12-02	-31.2538	30.0401	34	5412	3.91742	-179.613	2	2	1377
64W71	SAT64	EL	2011-12-02	-31.2538	30.04	34	5413	38.3797	60.8003	2	2	1378
64W71	SAT64	EL	2011-12-02	-31.2536	30.0397	34	5414	642.808	64.1747	2	2	1379
64W71	SAT64	EL	2011-12-02	-31.2483	30.0403	29	5415	692.78	-152.023	2	2	1380
64W71	SAT64	EL	2011-12-02	-31.2531	30.0366	34	5416	84.3189	23.3514	2	2	1381
64W71	SAT64	EL	2011-12-02	-31.2535	30.0359	34	5417	439.266	131.019	2	2	1382
64W71	SAT64	EL	2011-12-02	-31.2499	30.0365	34	5418	278.187	-42.6191	2	2	1383
64W71	SAT64	EL	2011-12-02	-31.248	30.035	34	5419	256.554	-68.3645	2	2	1384
64W71	SAT64	EL	2011-12-02	-31.2484	30.0326	34	5420	579.047	-70.5812	2	2	1385
64W71	SAT64	EL	2011-12-02	-31.2532	30.0319	34	5421	398.719	-11.5293	2	2	1386
64W71	SAT64	EL	2011-12-02	-31.2565	30.0323	34	5422	186.434	27.4609	2	2	1387
64W71	SAT64	EL	2011-12-02	-31.258	30.0316	34	5423	167.601	164.227	2	2	1388
64W71	SAT64	EL	2011-12-02	-31.2566	30.0318	34	5424	40.1195	30.5994	2	2	1389
64W71	SAT64	EL	2011-12-02	-31.2563	30.032	34	5425	2.63059	1.87767	2	2	1390
64W71	SAT64	EL	2011-12-02	-31.2563	30.032	34	5426	128.688	-147.101	2	2	1391
64W71	SAT64	EL	2011-12-02	-31.2566	30.0309	34	5427	307.965	37.133	2	2	1392
64W71	SAT64	EL	2011-12-02	-31.2558	30.028	34	5428	1110.17	-69.138	2	2	1393
64W71	SAT64	EL	2011-12-02	-31.2629	30.0211	34	5429	215.028	120.481	2	2	1394
64W71	SAT64	EL	2011-12-02	-31.2612	30.0205	34	5430	499.833	41.0943	2	2	1395
64W71	SAT64	EL	2011-12-02	-31.2573	30.0222	34	5431	657.755	-10.4166	2	2	1396
64W72	SAT64	EL	2011-12-10	-31.3051	29.9957	84	5821	222.186	-47.2229	2	2	1397
64W72	SAT64	EL	2011-12-10	-31.3067	29.9945	55	5822	726.937	24.3095	2	2	1398
64W72	SAT64	EL	2011-12-10	-31.3098	29.9885	84	5823	1109.14	-10.4694	2	2	1399
64W72	SAT64	EL	2011-12-10	-31.316	29.9806	55	5824	428.487	37.1414	2	2	1400
64W72	SAT64	EL	2011-12-10	-31.3163	29.9764	84	5825	352.934	3.79439	2	2	1401
64W72	SAT64	EL	2011-12-10	-31.3164	29.973	36	5826	36.1987	178.069	2	2	1402
64W72	SAT64	EL	2011-12-10	-31.3164	29.9733	36	5827	13.875	123.148	2	2	1403
64W72	SAT64	EL	2011-12-10	-31.3165	29.9733	36	5828	56.942	39.4356	2	2	1404
64W72	SAT64	EL	2011-12-10	-31.3167	29.9728	55	5829	0	-999	2	2	1405
64W72	SAT64	EL	2011-12-10	-31.3167	29.9728	55	5830	194.688	-999	2	2	1406
64W72	SAT64	EL	2011-12-10	-31.316	29.9745	36	5831	125.437	64.1751	2	2	1407
64W72	SAT64	EL	2011-12-10	-31.3166	29.9754	84	5832	68.0833	-91.2014	2	2	1408
64W72	SAT64	EL	2011-12-10	-31.3162	29.9758	84	5833	102.246	143.634	2	2	1409
64W72	SAT64	EL	2011-12-10	-31.317	29.9758	55	5834	9.4961	114.522	2	2	1410
64W72	SAT64	EL	2011-12-10	-31.317	29.9757	84	5835	13.1571	105.142	2	2	1411
64W72	SAT64	EL	2011-12-11	-31.3169	29.9758	84	5836	14.3625	-174.679	2	2	1412
64W72	SAT64	EL	2011-12-11	-31.317	29.9757	84	5837	5.51001	-156.411	2	2	1413
64W72	SAT64	EL	2011-12-11	-31.317	29.9758	84	5838	7.92582	-110.207	2	2	1414
64W72	SAT64	EL	2011-12-11	-31.3169	29.9757	84	5839	30.0795	-25.7841	2	2	1415
64W72	SAT64	EL	2011-12-11	-31.3168	29.9754	84	5840	26.4867	-102.327	2	2	1416
64W72	SAT64	EL	2011-12-11	-31.317	29.9754	84	5841	20.7866	138.973	2	2	1417
64W73	SAT64	EL	2011-12-23	-31.3086	29.9884	84	6411	15.5743	70.206	2	2	1418
64W73	SAT64	EL	2011-12-23	-31.3087	29.9885	84	6412	26.3845	165.557	2	2	1419
64W73	SAT64	EL	2011-12-23	-31.3085	29.9883	84	6413	8.13043	-151.65	2	2	1420
64W73	SAT64	EL	2011-12-23	-31.3086	29.9884	84	6414	2.69513	-28.18	2	2	1421
64W73	SAT64	EL	2011-12-23	-31.3086	29.9884	84	6415	89.0619	-116.633	2	2	1422
64W73	SAT64	EL	2011-12-23	-31.3079	29.9887	84	6416	5.32359	-62.5239	2	2	1423
64W73	SAT64	EL	2011-12-23	-31.3079	29.9887	84	6417	3.9141	100.355	2	2	1424
64W73	SAT64	EL	2011-12-23	-31.3079	29.9887	84	6418	69.2814	-30.784	2	2	1425
64W73	SAT64	EL	2011-12-23	-31.3074	29.989	84	6419	182.5	13.7672	2	2	1426
64W73	SAT64	EL	2011-12-23	-31.3063	29.9902	84	6420	540.015	40.4994	2	2	1427
64W73	SAT64	EL	2011-12-23	-31.3058	29.9955	55	6421	312.701	-23.6008	2	2	1428
64W73	SAT64	EL	2011-12-23	-31.3045	29.9981	55	6422	36.5363	10.3519	2	2	1429
64W73	SAT64	EL	2011-12-23	-31.3044	29.9984	55	6423	91.6587	-25.2694	2	2	1430
64W73	SAT64	EL	2011-12-23	-31.3039	29.9991	55	6424	282.395	-7.51101	2	2	1431
64W73	SAT64	EL	2011-12-23	-31.302	30.0007	55	6425	483.645	3.74374	2	2	1432
64W73	SAT64	EL	2011-12-23	-31.299	30.0038	55	6426	128.299	3.5747	2	2	1433
64W73	SAT64	EL	2011-12-23	-31.2983	30.0047	55	6427	84.8456	-16.1684	2	2	1434
64W73	SAT64	EL	2011-12-23	-31.2977	30.0051	55	6428	16.4806	-60.4946	2	2	1435
64W73	SAT64	EL	2011-12-23	-31.2976	30.0051	84	6429	87.2299	-90.5344	2	2	1436
64W73	SAT64	EL	2011-12-23	-31.2979	30.0043	84	6430	272.037	112.794	2	2	1437
64W73	SAT64	EL	2011-12-23	-31.2957	30.0039	84	6431	63.2501	66.5237	2	2	1438
64W74	SAT64	EL	2012-01-03	-31.3067	29.9942	55	6950	61.1591	8.89473	1	2	1439
64W74	SAT64	EL	2012-01-03	-31.3068	29.9936	55	6951	37.4438	-43.9191	1	2	1440
64W74	SAT64	EL	2012-01-03	-31.3071	29.9934	55	6952	177.353	-161.019	1	2	1441
64W74	SAT64	EL	2012-01-03	-31.3062	29.9948	55	6953	21.7713	-32.0665	1	2	1442
64W74	SAT64	EL	2012-01-03	-31.3061	29.9949	55	6954	1.65259	66.514	1	2	1443
64W74	SAT64	EL	2012-01-03	-31.3061	29.9949	55	6955	313.276	-73.7241	1	2	1444
64W74	SAT64	EL	2012-01-03	-31.3036	29.9957	84	6956	167.743	-80.7929	1	2	1445
64W74	SAT64	EL	2012-01-03	-31.303	29.9943	84	6957	67.3373	87.0659	1	2	1446
64W74	SAT64	EL	2012-01-03	-31.3025	29.9945	84	6958	212.813	42.3673	1	2	1447
64W74	SAT64	EL	2012-01-03	-31.3017	29.9964	84	6959	35.5748	-48.0368	1	2	1448
64W74	SAT64	EL	2012-01-03	-31.3014	29.9965	84	6960	709.341	-146.369	1	2	1449
64W74	SAT64	EL	2012-01-03	-31.3052	29.9912	84	6961	772.17	52.5382	1	2	1450
64W74	SAT64	EL	2012-01-03	-31.3037	29.9839	84	6962	429.555	11.4948	1	2	1451
64W74	SAT64	EL	2012-01-03	-31.3022	29.9801	84	6963	231.024	24.4623	1	2	1452
64W74	SAT64	EL	2012-01-03	-31.3008	29.9786	84	6964	10.1362	50.9581	1	2	1453
64W74	SAT64	EL	2012-01-03	-31.3007	29.9787	84	6965	198.434	145.418	1	2	1454
64W74	SAT64	EL	2012-01-03	-31.3022	29.9795	84	6966	262.512	-136.666	1	2	1455
64W74	SAT64	EL	2012-01-03	-31.3001	29.9803	84	6967	240.076	42.3278	1	2	1456
64W74	SAT64	EL	2012-01-03	-31.2992	29.9823	84	6968	130.898	-132.295	1	2	1457
64W74	SAT64	EL	2012-01-03	-31.2988	29.9811	84	6969	317.086	-21.2834	1	2	1458
64W74	SAT64	EL	2012-01-03	-31.2989	29.978	84	6970	692.246	-141.881	1	2	1459
64W75	SAT64	EL	2012-01-14	-31.2379	29.9904	20	7490	340.22	-164.2	1	2	1460
64W75	SAT64	EL	2012-01-14	-31.2389	29.9935	20	7491	593.79	149.074	1	2	1461
64W75	SAT64	EL	2012-01-14	-31.2399	29.9879	15	7492	5.55829	169.709	1	2	1462
64W75	SAT64	EL	2012-01-14	-31.2398	29.988	15	7493	10.6267	152.26	1	2	1463
64W75	SAT64	EL	2012-01-14	-31.2399	29.9879	15	7494	442.637	-123.646	1	2	1464
64W75	SAT64	EL	2012-01-14	-31.2403	29.9921	20	7495	156.866	51.916	1	2	1465
64W75	SAT64	EL	2012-01-14	-31.2415	29.9929	15	7496	1176.64	130.377	1	2	1466
64W75	SAT64	EL	2012-01-14	-31.2399	29.9817	31	7497	447.32	-67.2188	1	2	1467
64W75	SAT64	EL	2012-01-14	-31.243	29.9794	31	7498	945.218	-7.89652	1	2	1468
64W75	SAT64	EL	2012-01-14	-31.2502	29.9757	38	7499	307.553	83.6236	1	2	1469
64W75	SAT64	EL	2012-01-14	-31.2494	29.9728	38	7500	508.195	80.1511	1	2	1470
64W75	SAT64	EL	2012-01-14	-31.2452	29.9735	31	7501	285.171	-123.844	1	2	1471
64W75	SAT64	EL	2012-01-14	-31.2463	29.971	38	7502	185.491	109.973	1	2	1472
64W75	SAT64	EL	2012-01-14	-31.2447	29.9708	31	7503	46.8751	-66.8003	1	2	1473
64W75	SAT64	EL	2012-01-14	-31.2446	29.9704	31	7504	0	-999	1	2	1474
64W75	SAT64	EL	2012-01-14	-31.2446	29.9704	31	7505	2.60587	-999	1	2	1475
64W75	SAT64	EL	2012-01-14	-31.2446	29.9704	31	7506	72.055	143.558	1	2	1476
64W75	SAT64	EL	2012-01-14	-31.2445	29.9697	31	7507	37.5357	94.8177	1	2	1477
64W75	SAT64	EL	2012-01-14	-31.2442	29.9698	31	7508	6.92447	74.0168	1	2	1478
64W75	SAT64	EL	2012-01-14	-31.2442	29.9699	31	7509	3.41056	3.05856e-05	1	2	1479
64W75	SAT64	EL	2012-01-14	-31.2442	29.9699	31	7510	107.89	-54.9161	1	2	1480
64W76	SAT64	EL	2012-01-17	-31.253	29.9653	38	7641	364.001	-69.7083	3	1	1481
64W76	SAT64	EL	2012-01-17	-31.2549	29.9681	22	7642	338.19	107.171	3	1	1482
64W76	SAT64	EL	2012-01-17	-31.2565	29.9655	38	7643	320.332	35.5647	3	1	1483
64W76	SAT64	EL	2012-01-17	-31.2565	29.9624	22	7644	185.484	-103.066	3	1	1484
64W76	SAT64	EL	2012-01-17	-31.258	29.9628	22	7645	29.9812	-146.407	3	1	1485
64W76	SAT64	EL	2012-01-17	-31.2578	29.9629	22	7646	0	-999	3	1	1486
64W76	SAT64	EL	2012-01-17	-31.2578	29.9629	22	7647	67.5921	-999	3	1	1487
64W76	SAT64	EL	2012-01-17	-31.2573	29.9625	22	7648	2.69562	80.2692	3	1	1488
64W76	SAT64	EL	2012-01-17	-31.2573	29.9625	22	7649	6.8197	49.3332	3	1	1489
64W76	SAT64	EL	2012-01-17	-31.2573	29.9625	22	7650	17.1526	180	3	1	1490
64W76	SAT64	EL	2012-01-17	-31.2573	29.9624	22	7651	12.6644	-161.162	3	1	1491
64W76	SAT64	EL	2012-01-17	-31.2574	29.9625	22	7652	46.0946	73.2184	3	1	1492
64W76	SAT64	EL	2012-01-17	-31.2578	29.9625	22	7653	153.392	-107.192	3	1	1493
64W76	SAT64	EL	2012-01-18	-31.2574	29.9639	38	7654	136.217	-162.334	3	1	1494
64W76	SAT64	EL	2012-01-18	-31.2574	29.9626	22	7655	21.5229	13.6942	3	1	1495
64W76	SAT64	EL	2012-01-18	-31.2573	29.9624	22	7656	9.17014	-155.245	3	1	1496
64W76	SAT64	EL	2012-01-18	-31.2574	29.9625	22	7657	3.40985	139.02	3	1	1497
64W76	SAT64	EL	2012-01-18	-31.2574	29.9624	22	7658	49.9551	-26.1421	3	1	1498
64W76	SAT64	EL	2012-01-18	-31.2575	29.962	22	7659	163.624	173.54	3	1	1499
64W76	SAT64	EL	2012-01-18	-31.2568	29.9633	22	7660	5.32452	-17.5741	3	1	1500
64W76	SAT64	EL	2012-01-18	-31.2568	29.9633	22	7661	3.9759	81.1248	3	1	1501
64W77	SAT64	EL	2012-01-20	-31.2522	29.9679	38	7781	49.1769	98.084	2	2	1502
64W77	SAT64	EL	2012-01-20	-31.2523	29.9684	22	7782	4.45089	94.2648	2	2	1503
64W77	SAT64	EL	2012-01-20	-31.2524	29.9683	22	7783	162.134	128.196	2	2	1504
64W77	SAT64	EL	2012-01-20	-31.2512	29.9676	38	7784	213.815	-48.4417	2	2	1505
64W77	SAT64	EL	2012-01-20	-31.2508	29.9656	38	7785	300.274	92.9777	2	2	1506
64W77	SAT64	EL	2012-01-20	-31.2484	29.9664	38	7786	292.787	-2.38569	2	2	1507
64W77	SAT64	EL	2012-01-20	-31.246	29.967	38	7787	354.825	-154.827	2	2	1508
64W77	SAT64	EL	2012-01-20	-31.2483	29.9649	38	7788	169.868	-87.4228	2	2	1509
64W77	SAT64	EL	2012-01-20	-31.2492	29.9661	38	7789	116.074	-149.503	2	2	1510
64W77	SAT64	EL	2012-01-20	-31.2483	29.9658	38	7790	5.55695	129.745	2	2	1511
64W77	SAT64	EL	2012-01-20	-31.2483	29.9658	38	7791	1.75682	158.41	2	2	1512
64W77	SAT64	EL	2012-01-20	-31.2483	29.9658	38	7792	1.75682	-1.04012e-05	2	2	1513
64W77	SAT64	EL	2012-01-20	-31.2483	29.9658	38	7793	55.2507	165.244	2	2	1514
64W77	SAT64	EL	2012-01-20	-31.2482	29.9663	38	7794	76.921	-59.6559	2	2	1515
64W77	SAT64	EL	2012-01-20	-31.2476	29.9665	38	7795	7.92883	123.743	2	2	1516
64W77	SAT64	EL	2012-01-20	-31.2477	29.9666	38	7796	171.832	-122.443	2	2	1517
64W77	SAT64	EL	2012-01-20	-31.2463	29.967	38	7797	390.685	54.5685	2	2	1518
64W77	SAT64	EL	2012-01-20	-31.2453	29.9706	31	7798	101.983	56.033	2	2	1519
64W77	SAT64	EL	2012-01-21	-31.2458	29.9714	38	7799	91.0191	60.1479	2	2	1520
64W77	SAT64	EL	2012-01-21	-31.2465	29.9713	38	7800	6.01413	-7.63414	2	2	1521
64W77	SAT64	EL	2012-01-21	-31.2466	29.9713	38	7801	24.425	80.3602	2	2	1522
64W78	SAT64	EL	2012-02-08	-31.2532	29.9737	38	7781	49.1769	98.084	2	2	1523
64W78	SAT64	EL	2012-02-08	-31.252	29.9785	22	7782	4.45089	94.2648	2	2	1524
64W78	SAT64	EL	2012-02-08	-31.2522	29.9775	22	7783	162.134	128.196	2	2	1525
64W78	SAT64	EL	2012-02-08	-31.2512	29.9723	38	7784	213.815	-48.4417	2	2	1526
64W78	SAT64	EL	2012-02-08	-31.249	29.9678	38	7785	300.274	92.9777	2	2	1527
64W78	SAT64	EL	2012-02-08	-31.25	29.9654	38	7786	292.787	-2.38569	2	2	1528
64W78	SAT64	EL	2012-02-08	-31.2518	29.9641	38	7787	354.825	-154.827	2	2	1529
64W78	SAT64	EL	2012-02-08	-31.2517	29.9637	38	7788	169.868	-87.4228	2	2	1530
64W78	SAT64	EL	2012-02-08	-31.2523	29.9634	38	7789	116.074	-149.503	2	2	1531
64W78	SAT64	EL	2012-02-08	-31.2522	29.9634	38	7790	5.55695	129.745	2	2	1532
64W78	SAT64	EL	2012-02-08	-31.2532	29.9628	38	7791	1.75682	158.41	2	2	1533
64W78	SAT64	EL	2012-02-08	-31.2542	29.9628	38	7792	1.75682	-1.04012e-05	2	2	1534
64W78	SAT64	EL	2012-02-08	-31.2541	29.9628	38	7793	55.2507	165.244	2	2	1535
64W78	SAT64	EL	2012-02-08	-31.2541	29.9628	38	7794	76.921	-59.6559	2	2	1536
64W78	SAT64	EL	2012-02-08	-31.2548	29.9617	38	7795	7.92883	123.743	2	2	1537
64W78	SAT64	EL	2012-02-08	-31.257	29.9626	38	7796	171.832	-122.443	2	2	1538
64W78	SAT64	EL	2012-02-09	-31.2563	29.963	38	7797	390.685	54.5685	2	2	1539
64W78	SAT64	EL	2012-02-09	-31.2564	29.963	31	7798	101.983	56.033	2	2	1540
64W78	SAT64	EL	2012-02-09	-31.2564	29.9629	38	7799	91.0191	60.1479	2	2	1541
64W78	SAT64	EL	2012-02-09	-31.2564	29.9629	38	7800	6.01413	-7.63414	2	2	1542
64W78	SAT64	EL	2012-02-09	-31.2564	29.963	38	7801	24.425	80.3602	2	2	1543
64W79	SAT64	EL	2012-02-08	-31.2532	29.9737	38	8691	512.814	-50.1414	3	2	1544
64W79	SAT64	EL	2012-02-08	-31.252	29.9785	10	8692	107.966	-172.461	3	2	1545
64W79	SAT64	EL	2012-02-08	-31.2522	29.9775	10	8693	546.97	20.2177	3	2	1546
64W79	SAT64	EL	2012-02-08	-31.2512	29.9723	38	8694	533.595	18.8391	3	2	1547
64W79	SAT64	EL	2012-02-08	-31.249	29.9678	38	8695	279.435	-55.5106	3	2	1548
64W79	SAT64	EL	2012-02-08	-31.25	29.9654	38	8696	254.987	-32.269	3	2	1549
64W79	SAT64	EL	2012-02-08	-31.2518	29.9641	38	8697	41.3651	74.2037	3	2	1550
64W79	SAT64	EL	2012-02-08	-31.2517	29.9637	38	8698	76.015	-84.1925	3	2	1551
64W79	SAT64	EL	2012-02-08	-31.2523	29.9634	22	8699	5.5567	-134.302	3	2	1552
64W79	SAT64	EL	2012-02-08	-31.2522	29.9634	22	8700	131.801	139.653	3	2	1553
64W79	SAT64	EL	2012-02-08	-31.2532	29.9628	22	8701	122.51	-24.8697	3	2	1554
64W79	SAT64	EL	2012-02-08	-31.2542	29.9628	22	8702	8.2263	-171.597	3	2	1555
64W79	SAT64	EL	2012-02-08	-31.2541	29.9628	22	8703	0	-999	3	2	1556
64W79	SAT64	EL	2012-02-08	-31.2541	29.9628	22	8704	136.039	-999	3	2	1557
64W79	SAT64	EL	2012-02-08	-31.2548	29.9617	22	8705	284.216	-77.0605	3	2	1558
64W79	SAT64	EL	2012-02-08	-31.257	29.9626	22	8706	93.791	-134.753	3	2	1559
64W79	SAT64	EL	2012-02-09	-31.2563	29.963	22	8707	18.3605	143.15	3	2	1560
64W79	SAT64	EL	2012-02-09	-31.2564	29.963	22	8708	11.2404	163.339	3	2	1561
64W79	SAT64	EL	2012-02-09	-31.2564	29.9629	22	8709	0	-999	3	2	1562
64W79	SAT64	EL	2012-02-09	-31.2564	29.9629	22	8710	1.75662	-999	3	2	1563
64W79	SAT64	EL	2012-02-09	-31.2564	29.963	22	8711	60.8238	-55.5467	3	2	1564
64W8	SAT64EL	EL	2011-09-09	-31.2938	29.9634	36	1404	6.26441	37.6054	2	1	1565
64W8	SAT64EL	EL	2011-09-09	-31.2932	29.9618	36	1411	7.93756	-176.489	2	1	1566
64W8	SAT64EL	EL	2011-09-09	-31.2897	29.9633	84	1413	46.6592	64.4961	2	1	1567
64W8	SAT64EL	EL	2011-09-09	-31.2937	29.9634	36	1405	56.6443	-25.7264	2	1	1568
64W8	SAT64EL	EL	2011-09-09	-31.2934	29.963	36	1406	60.369	85.1873	2	1	1569
64W8	SAT64EL	EL	2011-09-09	-31.292	29.9721	36	1419	66.7924	62.7169	2	1	1570
64W8	SAT64EL	EL	2011-09-09	-31.2941	29.964	36	1403	68.1465	60.0714	2	1	1571
64W8	SAT64EL	EL	2011-09-09	-31.2909	29.9721	36	1418	134.269	81.8641	2	1	1572
64W8	SAT64EL	EL	2011-09-09	-31.2921	29.9609	84	1409	143.055	142.986	2	1	1573
64W8	SAT64EL	EL	2011-09-09	-31.2889	29.9655	84	1415	143.672	-6.74425	2	1	1574
64W8	SAT64EL	EL	2011-09-09	-31.2916	29.9626	84	1408	179.718	-82.5937	2	1	1575
64W8	SAT64EL	EL	2011-09-09	-31.293	29.9634	36	1407	196.794	-70.7933	2	1	1576
64W8	SAT64EL	EL	2011-09-09	-31.2896	29.9638	84	1414	199.533	-21.1917	2	1	1577
64W8	SAT64EL	EL	2011-09-09	-31.2911	29.9617	84	1410	253.033	143.705	2	1	1578
64W8	SAT64EL	EL	2011-09-09	-31.2926	29.9639	36	1401	254.024	48.1142	2	1	1579
64W8	SAT64EL	EL	2011-09-09	-31.2932	29.9663	36	1402	261.864	137.666	2	1	1580
64W8	SAT64EL	EL	2011-09-09	-31.2939	29.9612	36	1400	319.124	-999	2	1	1581
64W8	SAT64EL	EL	2011-09-09	-31.2905	29.9689	36	1417	327.592	-43.2797	2	1	1582
64W8	SAT64EL	EL	2011-09-09	-31.2883	29.9667	84	1416	361.29	82.9316	2	1	1583
64W8	SAT64EL	EL	2011-09-09	-31.2931	29.9618	36	1412	442.904	20.4748	2	1	1584
64W80	SAT64	EL	2012-02-18	-31.2508	29.9787	6	9171	771.298	166.887	1	2	1585
64W80	SAT64	EL	2012-02-18	-31.2511	29.9713	31	9172	194.538	-67.9908	1	2	1586
64W80	SAT64	EL	2012-02-18	-31.2527	29.9706	6	9173	1058.86	50.6747	1	2	1587
64W80	SAT64	EL	2012-02-18	-31.2558	29.9611	22	9174	152.782	-46.001	1	2	1588
64W80	SAT64	EL	2012-02-18	-31.257	29.9605	22	9175	155.214	-174.753	1	2	1589
64W80	SAT64	EL	2012-02-18	-31.2558	29.9612	22	9176	31.0663	65.2621	1	2	1590
64W80	SAT64	EL	2012-02-18	-31.2558	29.9615	22	9177	42.5203	-170.195	1	2	1591
64W80	SAT64	EL	2012-02-18	-31.2558	29.9611	22	9178	1.75661	-13.5785	1	2	1592
64W80	SAT64	EL	2012-02-18	-31.2558	29.9611	22	9179	10.5593	-145.284	1	2	1593
64W80	SAT64	EL	2012-02-18	-31.2558	29.9612	22	9180	12.2418	136.24	1	2	1594
64W80	SAT64	EL	2012-02-18	-31.2558	29.9611	22	9181	104.86	-125.908	1	2	1595
64W80	SAT64	EL	2012-02-18	-31.2565	29.9618	22	9182	363.408	60.0677	1	2	1596
64W80	SAT64	EL	2012-02-18	-31.2594	29.9609	22	9183	170.16	-97.6816	1	2	1597
64W80	SAT64	EL	2012-02-18	-31.2596	29.9625	22	9184	190.758	-148.345	1	2	1598
64W80	SAT64	EL	2012-02-18	-31.2585	29.9611	22	9185	429.19	103.521	1	2	1599
64W80	SAT64	EL	2012-02-19	-31.2564	29.9643	38	9186	210.277	-125.99	1	2	1600
64W80	SAT64	EL	2012-02-19	-31.2559	29.9624	22	9187	53.3231	-45.9239	1	2	1601
64W80	SAT64	EL	2012-02-19	-31.2561	29.962	22	9188	6.92311	29.3049	1	2	1602
64W80	SAT64	EL	2012-02-19	-31.2561	29.9619	22	9189	41.1577	-157.129	1	2	1603
64W80	SAT64	EL	2012-02-19	-31.2562	29.9623	22	9190	224.667	-47.0803	1	2	1604
64W80	SAT64	EL	2012-02-19	-31.2555	29.9642	38	9191	141.868	-1.786	1	2	1605
64W81	SAT64	EL	2012-03-09	-31.2441	29.9846	15	10130	1.75712	-180	1	2	1606
64W81	SAT64	EL	2012-03-09	-31.2441	29.9846	15	10131	5.23372	49.3303	1	2	1607
64W81	SAT64	EL	2012-03-09	-31.2441	29.9846	15	10132	6.26608	-123.044	1	2	1608
64W81	SAT64	EL	2012-03-09	-31.2442	29.9845	15	10133	54.8728	-177.95	1	2	1609
64W81	SAT64	EL	2012-03-09	-31.2437	29.9847	15	10134	149.199	-75.804	1	2	1610
64W81	SAT64	EL	2012-03-09	-31.2431	29.9835	15	10135	266.466	0.267305	1	2	1611
64W81	SAT64	EL	2012-03-09	-31.2418	29.9813	31	10136	63.2219	-91.6949	1	2	1612
64W81	SAT64	EL	2012-03-09	-31.2423	29.981	31	10137	66.0403	-176.158	1	2	1613
64W81	SAT64	EL	2012-03-10	-31.2418	29.9814	31	10138	160.295	8.52634	1	2	1614
64W81	SAT64	EL	2012-03-10	-31.2409	29.9825	31	10139	10.5366	57.7163	1	2	1615
64W81	SAT64	EL	2012-03-10	-31.2409	29.9825	31	10140	6.01461	-101.19	1	2	1616
64W81	SAT64	EL	2012-03-10	-31.2408	29.9825	31	10141	549.598	28.4502	1	2	1617
64W81	SAT64	EL	2012-03-10	-31.2368	29.9851	31	10142	450.624	24.9574	1	2	1618
64W81	SAT64	EL	2012-03-10	-31.2346	29.9886	31	10143	164.485	125.369	1	2	1619
64W81	SAT64	EL	2012-03-10	-31.236	29.9886	31	10144	41.5393	85.7395	1	2	1620
64W81	SAT64	EL	2012-03-10	-31.236	29.9882	31	10145	4.34136	71.607	1	2	1621
64W81	SAT64	EL	2012-03-10	-31.236	29.9882	31	10146	5.2342	-115.45	1	2	1622
64W81	SAT64	EL	2012-03-10	-31.236	29.9882	31	10147	2.63015	-79.6373	1	2	1623
64W81	SAT64	EL	2012-03-10	-31.236	29.9882	31	10148	9.57489	-108.364	1	2	1624
64W81	SAT64	EL	2012-03-10	-31.2359	29.9882	31	10149	123.098	-159.754	1	2	1625
64W81	SAT64	EL	2012-03-10	-31.2366	29.9873	31	10150	489.428	146.629	1	2	1626
64W82	SAT64	EL	2012-03-18	-31.2669	30.0148	34	10550	1116.21	47.4204	3	2	1627
64W82	SAT64	EL	2012-03-18	-31.2758	30.0178	3	10551	750.307	66.7613	3	2	1628
64W82	SAT64	EL	2012-03-18	-31.2798	30.0121	27	10552	394.208	60.3882	3	2	1629
64W82	SAT64	EL	2012-03-18	-31.2786	30.0086	27	10553	692.112	-136.031	3	2	1630
64W82	SAT64	EL	2012-03-18	-31.2838	30.0114	3	10554	509.126	158.741	3	2	1631
64W82	SAT64	EL	2012-03-18	-31.2809	30.0078	27	10555	35.3011	178.773	3	2	1632
64W82	SAT64	EL	2012-03-18	-31.2811	30.0081	27	10556	12.5042	-117.141	3	2	1633
64W82	SAT64	EL	2012-03-18	-31.281	30.0081	27	10557	9.98511	-15.8246	3	2	1634
64W82	SAT64	EL	2012-03-18	-31.2809	30.0081	27	10558	8.13198	-167.525	3	2	1635
64W82	SAT64	EL	2012-03-18	-31.2809	30.0081	27	10559	2.53734	126.866	3	2	1636
64W82	SAT64	EL	2012-03-18	-31.2809	30.0081	27	10560	46.9883	173.583	3	2	1637
64W82	SAT64	EL	2012-03-18	-31.2812	30.0084	27	10561	360.66	29.0024	3	2	1638
64W82	SAT64	EL	2012-03-18	-31.284	30.0095	3	10562	141.66	72.5631	3	2	1639
64W82	SAT64	EL	2012-03-18	-31.2847	30.0084	55	10563	80.9735	-4.52684	3	2	1640
64W82	SAT64	EL	2012-03-18	-31.2852	30.0078	55	10564	23.7873	170.697	3	2	1641
64W82	SAT64	EL	2012-03-18	-31.285	30.0079	55	10565	99.4513	58.6001	3	2	1642
64W82	SAT64	EL	2012-03-18	-31.2851	30.0089	55	10566	239.859	-111.291	3	2	1643
64W82	SAT64	EL	2012-03-19	-31.2832	30.0084	3	10567	94.3977	-59.3894	3	2	1644
64W82	SAT64	EL	2012-03-19	-31.2829	30.0075	3	10568	4.34116	47.5549	3	2	1645
64W82	SAT64	EL	2012-03-19	-31.2829	30.0075	3	10569	1.75651	113.866	3	2	1646
64W82	SAT64	EL	2012-03-19	-31.2829	30.0075	3	10570	1.75651	180	3	2	1647
64W9	SAT64EL	EL	2011-09-13	-31.2972	29.9695	36	1601	2.62889	-2.90013	3	2	1648
64W9	SAT64EL	EL	2011-09-13	-31.2975	29.9788	84	1616	5.3236	-164.259	3	2	1649
64W9	SAT64EL	EL	2011-09-13	-31.2972	29.9695	36	1602	6.51315	-88.5986	3	2	1650
64W9	SAT64EL	EL	2011-09-13	-31.2975	29.9788	84	1617	6.91269	69.3542	3	2	1651
64W9	SAT64EL	EL	2011-09-13	-31.2974	29.9788	84	1618	10.472	25.4066	3	2	1652
64W9	SAT64EL	EL	2011-09-13	-31.2972	29.9782	84	1615	71.0176	39.1278	3	2	1653
64W9	SAT64EL	EL	2011-09-13	-31.2954	29.9699	36	1608	174.357	63.1285	3	2	1654
64W9	SAT64EL	EL	2011-09-13	-31.2974	29.9789	84	1619	175.016	-171.483	3	2	1655
64W9	SAT64EL	EL	2011-09-13	-31.2958	29.9683	36	1600	210.626	-999	3	2	1656
64W9	SAT64EL	EL	2011-09-13	-31.2909	29.9718	36	1606	217.811	125.454	3	2	1657
64W9	SAT64EL	EL	2011-09-13	-31.2964	29.964	36	1610	304.268	-26.7625	3	2	1658
64W9	SAT64EL	EL	2011-09-13	-31.2979	29.9676	36	1612	365.385	31.4467	3	2	1659
64W9	SAT64EL	EL	2011-09-13	-31.2975	29.9744	36	1614	393.8	24.5183	3	2	1660
64W9	SAT64EL	EL	2011-09-13	-31.2927	29.9722	36	1607	399.828	48.9538	3	2	1661
64W9	SAT64EL	EL	2011-09-13	-31.2972	29.9696	36	1603	410.202	-145.533	3	2	1662
64W9	SAT64EL	EL	2011-09-13	-31.2935	29.9691	36	1605	413.683	4.52176	3	2	1663
64W9	SAT64EL	EL	2011-09-13	-31.2992	29.9707	36	1613	439.649	-56.2716	3	2	1664
64W9	SAT64EL	EL	2011-09-13	-31.2951	29.9683	36	1609	464.647	-28.4348	3	2	1665
64W9	SAT64EL	EL	2011-09-13	-31.2982	29.962	36	1611	580.039	-138.457	3	2	1666
64W9	SAT64EL	EL	2011-09-13	-31.2974	29.9656	36	1604	591.681	130.306	3	2	1667
65W1	SAT65	EL	2011-08-13	-31.2911	30.0036	55	1	1.75629	-999	1	2	1668
65W1	SAT65	EL	2011-08-13	-31.2936	30.0051	84	5	2.53709	156.435	1	2	1669
65W1	SAT65	EL	2011-08-13	-31.2936	30.0051	84	7	3.96982	164.634	1	2	1670
65W1	SAT65	EL	2011-08-13	-31.284	30.0034	3	19	3.97583	-136.394	1	2	1671
65W1	SAT65	EL	2011-08-13	-31.2936	30.0051	84	8	5.23284	40.6549	1	2	1672
65W1	SAT65	EL	2011-08-13	-31.2936	30.0051	84	6	6.2379	56.0217	1	2	1673
65W1	SAT65	EL	2011-08-13	-31.284	30.0033	3	18	8.78897	-170.358	1	2	1674
65W1	SAT65	EL	2011-08-13	-31.2911	30.0036	55	2	124.758	133.682	1	2	1675
65W1	SAT65	EL	2011-08-13	-31.2795	30.0112	27	13	136.478	94.06	1	2	1676
65W1	SAT65	EL	2011-08-13	-31.2789	30.0123	27	14	148.855	53.1007	1	2	1677
65W1	SAT65	EL	2011-08-13	-31.2903	30.0044	55	3	158.396	138.189	1	2	1678
65W1	SAT65	EL	2011-08-13	-31.2936	30.0051	84	9	159.409	-169.604	1	2	1679
65W1	SAT65	EL	2011-08-13	-31.2811	30.0101	27	16	173.828	-13.0032	1	2	1680
65W1	SAT65	EL	2011-08-13	-31.2809	30.0123	3	12	198.233	-85.7661	1	2	1681
65W1	SAT65	EL	2011-08-13	-31.2916	30.0044	84	4	251.708	-18.9579	1	2	1682
65W1	SAT65	EL	2011-08-13	-31.2794	30.0137	3	15	417.55	128.818	1	2	1683
65W1	SAT65	EL	2011-08-13	-31.2821	30.0089	3	17	623.461	19.7138	1	2	1684
65W1	SAT65	EL	2011-08-13	-31.2928	30.0063	84	10	828.162	-60.0231	1	2	1685
65W1	SAT65	EL	2011-08-13	-31.286	30.005	55	11	973.594	59.7509	1	2	1686
65W10	SAT65	EL	2011-09-19	-31.2816	30.0167	55	1819	1.75664	53.2481	3	2	1687
65W10	SAT65	EL	2011-09-19	-31.2789	30.0101	27	1813	3.97004	-40.6593	3	2	1688
65W10	SAT65	EL	2011-09-19	-31.279	30.01	27	1812	5.23348	164.96	3	2	1689
65W10	SAT65	EL	2011-09-19	-31.2781	30.0152	3	1800	23.7895	-999	3	2	1690
65W10	SAT65	EL	2011-09-19	-31.2787	30.0105	27	1811	60.4162	-80.1961	3	2	1691
65W10	SAT65	EL	2011-09-19	-31.2782	30.0116	27	1815	61.8408	46.5814	3	2	1692
65W10	SAT65	EL	2011-09-19	-31.2798	30.0131	27	1809	112.071	-107.287	3	2	1693
65W10	SAT65	EL	2011-09-19	-31.2808	30.0173	55	1818	115.018	128.324	3	2	1694
65W10	SAT65	EL	2011-09-19	-31.2809	30.0159	55	1817	144.721	-38.2726	3	2	1695
65W10	SAT65	EL	2011-09-19	-31.2782	30.0173	3	1802	154.208	53.7846	3	2	1696
65W10	SAT65	EL	2011-09-19	-31.2789	30.0101	27	1814	173.072	62.377	3	2	1697
65W10	SAT65	EL	2011-09-19	-31.278	30.0154	3	1801	204.579	56.0946	3	2	1698
65W10	SAT65	EL	2011-09-19	-31.28	30.012	27	1810	217.802	56.2216	3	2	1699
65W10	SAT65	EL	2011-09-19	-31.2812	30.0138	3	1807	250.454	58.5558	3	2	1700
65W10	SAT65	EL	2011-09-19	-31.2789	30.0123	27	1806	312.729	123.699	3	2	1701
65W10	SAT65	EL	2011-09-19	-31.283	30.0126	3	1808	383.836	157.744	3	2	1702
65W10	SAT65	EL	2011-09-19	-31.2793	30.0181	55	1803	447.01	77.5069	3	2	1703
65W10	SAT65	EL	2011-09-19	-31.2784	30.0121	27	1816	489.754	17.746	3	2	1704
65W10	SAT65	EL	2011-09-19	-31.2818	30.0148	3	1804	548.318	24.0644	3	2	1705
65W10	SAT65	EL	2011-09-19	-31.2832	30.0098	3	1805	573.645	134.849	3	2	1706
65W11	SAT65	EL	2011-09-24	-31.2659	30.0351	55	2013	2.69667	-57.6408	1	2	1707
65W11	SAT65	EL	2011-09-23	-31.2666	30.0352	55	2005	12.0935	-49.3372	1	2	1708
65W11	SAT65	EL	2011-09-24	-31.2659	30.0351	55	2014	12.0947	-6.32708	1	2	1709
65W11	SAT65	EL	2011-09-23	-31.2667	30.0353	55	2004	13.1658	37.8264	1	2	1710
65W11	SAT65	EL	2011-09-24	-31.2662	30.0321	33	2019	13.883	-52.504	1	2	1711
65W11	SAT65	EL	2011-09-23	-31.2668	30.0356	55	2003	40.4004	-137.41	1	2	1712
65W11	SAT65	EL	2011-09-23	-31.2661	30.0355	55	2008	43.3855	35.8427	1	2	1713
65W11	SAT65	EL	2011-09-23	-31.2666	30.035	55	2006	50.9132	-168.688	1	2	1714
65W11	SAT65	EL	2011-09-23	-31.267	30.0352	55	2002	54.3096	-156.659	1	2	1715
65W11	SAT65	EL	2011-09-23	-31.2667	30.0355	55	2007	66.7327	-108.698	1	2	1716
65W11	SAT65	EL	2011-09-24	-31.2664	30.0346	55	2017	77.1214	85.7546	1	2	1717
65W11	SAT65	EL	2011-09-23	-31.2658	30.0357	55	2009	96.322	5.24064	1	2	1718
65W11	SAT65	EL	2011-09-23	-31.2658	30.0342	33	2012	97.4601	84.1607	1	2	1719
65W11	SAT65	EL	2011-09-23	-31.2673	30.0337	55	2011	190.349	149.755	1	2	1720
65W11	SAT65	EL	2011-09-24	-31.266	30.034	33	2018	198.117	-46.1887	1	2	1721
65W11	SAT65	EL	2011-09-24	-31.2658	30.0352	55	2015	211.173	10.2448	1	2	1722
65W11	SAT65	EL	2011-09-23	-31.2621	30.0362	7	2000	275.412	-999	1	2	1723
65W11	SAT65	EL	2011-09-24	-31.2645	30.0366	55	2016	309.095	178.278	1	2	1724
65W11	SAT65	EL	2011-09-23	-31.2652	30.0362	55	2010	362.02	-169.309	1	2	1725
65W11	SAT65	EL	2011-09-23	-31.2626	30.0388	7	2001	648.457	112.962	1	2	1726
65W12	SAT65	EL	2011-09-28	-31.2969	29.9755	36	2214	1.65258	153.368	3	2	1727
65W12	SAT65	EL	2011-09-27	-31.2982	29.976	84	2202	1.75584	-113.216	3	2	1728
65W12	SAT65	EL	2011-09-28	-31.2973	29.9746	36	2209	1.75585	139.478	3	2	1729
65W12	SAT65	EL	2011-09-28	-31.2969	29.9755	36	2215	5.29956	48.4991	3	2	1730
65W12	SAT65	EL	2011-09-28	-31.2972	29.9746	36	2211	5.32348	130.33	3	2	1731
65W12	SAT65	EL	2011-09-28	-31.2973	29.9746	36	2210	10.2545	99.8601	3	2	1732
65W12	SAT65	EL	2011-09-27	-31.2987	29.9753	36	2200	51.7271	-999	3	2	1733
65W12	SAT65	EL	2011-09-28	-31.2969	29.9741	36	2208	67.9358	-50.7772	3	2	1734
65W12	SAT65	EL	2011-09-28	-31.2958	29.9749	36	2206	83.0215	56.5424	3	2	1735
65W12	SAT65	EL	2011-09-28	-31.2973	29.9746	36	2212	96.9625	-147.287	3	2	1736
65W12	SAT65	EL	2011-09-28	-31.2965	29.9745	36	2213	111.616	123.73	3	2	1737
65W12	SAT65	EL	2011-09-27	-31.2992	29.9755	84	2201	126.554	-135.23	3	2	1738
65W12	SAT65	EL	2011-09-28	-31.2957	29.9741	36	2207	150.382	-94.2704	3	2	1739
65W12	SAT65	EL	2011-09-28	-31.2917	29.9742	36	2219	168.578	-27.9519	3	2	1740
65W12	SAT65	EL	2011-09-28	-31.2931	29.9744	36	2218	171.558	75.26	3	2	1741
65W12	SAT65	EL	2011-09-28	-31.2934	29.9763	36	2217	206.75	-94.6896	3	2	1742
65W12	SAT65	EL	2011-09-27	-31.2982	29.976	84	2203	246.031	77.8837	3	2	1743
65W12	SAT65	EL	2011-09-27	-31.2937	29.9769	36	2205	322.658	-166.928	3	2	1744
65W12	SAT65	EL	2011-09-27	-31.2962	29.9755	36	2204	334.422	38.0704	3	2	1745
65W12	SAT65	EL	2011-09-28	-31.2968	29.9754	36	2216	429.113	54.0128	3	2	1746
65W13	SAT65	EL	2011-10-02	-31.2968	29.9578	36	2405	1.9242	117.983	2	1	1747
65W13	SAT65	EL	2011-10-02	-31.2998	29.9577	36	2416	4.41011	19.4971	2	1	1748
65W13	SAT65	EL	2011-10-02	-31.2998	29.9577	36	2415	5.29889	60.6411	2	1	1749
65W13	SAT65	EL	2011-10-02	-31.2999	29.9577	36	2417	6.5864	150.378	2	1	1750
65W13	SAT65	EL	2011-10-02	-31.3012	29.9572	36	2401	12.4996	55.182	2	1	1751
65W13	SAT65	EL	2011-10-02	-31.2968	29.9578	36	2406	19.5777	-135.445	2	1	1752
65W13	SAT65	EL	2011-10-02	-31.2956	29.9576	36	2409	50.5382	57.8138	2	1	1753
65W13	SAT65	EL	2011-10-02	-31.2971	29.9572	36	2404	68.1803	77.592	2	1	1754
65W13	SAT65	EL	2011-10-02	-31.301	29.9564	36	2400	80.1656	-999	2	1	1755
65W13	SAT65	EL	2011-10-02	-31.2953	29.9585	36	2412	108.458	-103.082	2	1	1756
65W13	SAT65	EL	2011-10-02	-31.2967	29.9579	36	2407	112.716	64.1125	2	1	1757
65W13	SAT65	EL	2011-10-02	-31.2964	29.9582	36	2411	134.414	-148.844	2	1	1758
65W13	SAT65	EL	2011-10-02	-31.2952	29.9578	36	2410	146.805	145.091	2	1	1759
65W13	SAT65	EL	2011-10-02	-31.2984	29.9577	36	2403	166.544	-23.2102	2	1	1760
65W13	SAT65	EL	2011-10-02	-31.2998	29.9577	36	2418	166.636	-52.324	2	1	1761
65W13	SAT65	EL	2011-10-02	-31.3001	29.956	36	2414	181.267	-117.162	2	1	1762
65W13	SAT65	EL	2011-10-02	-31.297	29.959	36	2408	214.492	-148.632	2	1	1763
65W13	SAT65	EL	2011-10-02	-31.3013	29.9572	36	2402	349.815	-156.545	2	1	1764
65W13	SAT65	EL	2011-10-02	-31.3002	29.9561	36	2419	452.282	146.578	2	1	1765
65W13	SAT65	EL	2011-10-02	-31.2953	29.9575	36	2413	597.681	-75.9937	2	1	1766
65W14	SAT65	EL	2011-10-06	-31.3121	29.9754	36	2607	6.9636	166.456	3	2	1767
65W14	SAT65	EL	2011-10-06	-31.3094	29.9777	84	2610	11.9795	50.7609	3	2	1768
65W14	SAT65	EL	2011-10-06	-31.3072	29.9893	84	2613	15.9977	-65.7562	3	2	1769
65W14	SAT65	EL	2011-10-06	-31.3071	29.9893	84	2614	24.1206	-4.17445	3	2	1770
65W14	SAT65	EL	2011-10-06	-31.3121	29.9746	36	2603	26.1231	-65.7504	3	2	1771
65W14	SAT65	EL	2011-10-06	-31.3126	29.9749	36	2606	72.1821	-157.42	3	2	1772
65W14	SAT65	EL	2011-10-06	-31.3035	29.9867	84	2618	78.371	7.17701	3	2	1773
65W14	SAT65	EL	2011-10-06	-31.3051	29.9895	84	2616	116.711	-61.1093	3	2	1774
65W14	SAT65	EL	2011-10-06	-31.311	29.9749	36	2602	140.145	69.9164	3	2	1775
65W14	SAT65	EL	2011-10-06	-31.3122	29.9754	36	2608	140.378	179.106	3	2	1776
65W14	SAT65	EL	2011-10-06	-31.3106	29.9716	36	2600	186.934	-999	3	2	1777
65W14	SAT65	EL	2011-10-06	-31.3101	29.9733	36	2601	192.157	53.689	3	2	1778
65W14	SAT65	EL	2011-10-06	-31.3122	29.9748	36	2604	201.789	-97.5548	3	2	1779
65W14	SAT65	EL	2011-10-06	-31.3069	29.9892	84	2615	216.015	11.0392	3	2	1780
65W14	SAT65	EL	2011-10-06	-31.3108	29.9757	36	2605	228.015	171.04	3	2	1781
65W14	SAT65	EL	2011-10-06	-31.3045	29.9886	84	2617	233.773	-1.2883	3	2	1782
65W14	SAT65	EL	2011-10-06	-31.3112	29.9761	36	2609	263.992	9.85384	3	2	1783
65W14	SAT65	EL	2011-10-06	-31.3094	29.9778	84	2611	593.821	0.00179732	3	2	1784
65W14	SAT65	EL	2011-10-06	-31.3094	29.9835	84	2612	649.471	-24.2385	3	2	1785
65W14	SAT65	EL	2011-10-06	-31.303	29.9861	84	2619	736.716	-150.881	3	2	1786
65W15	SAT65	EL	2011-10-10	-31.2795	30.0085	27	2803	2.62984	-69.8483	3	2	1787
65W15	SAT65	EL	2011-10-10	-31.2819	30.0076	3	2810	5.2333	-32.375	3	2	1788
65W15	SAT65	EL	2011-10-10	-31.2797	30.0093	27	2801	6.81975	-100.611	3	2	1789
65W15	SAT65	EL	2011-10-10	-31.2794	30.0132	27	2807	26.1865	-163.638	3	2	1790
65W15	SAT65	EL	2011-10-10	-31.2855	30.0047	55	2816	30.5153	-94.3992	3	2	1791
65W15	SAT65	EL	2011-10-10	-31.2797	30.0092	27	2802	74.6602	18.7999	3	2	1792
65W15	SAT65	EL	2011-10-10	-31.2857	30.0055	55	2815	90.5677	161.026	3	2	1793
65W15	SAT65	EL	2011-10-10	-31.2785	30.0133	27	2806	100.942	92.6534	3	2	1794
65W15	SAT65	EL	2011-10-10	-31.2807	30.0091	27	2800	112.238	-999	3	2	1795
65W15	SAT65	EL	2011-10-10	-31.2792	30.0133	27	2808	152.778	152.881	3	2	1796
65W15	SAT65	EL	2011-10-10	-31.2891	30.0101	84	2818	164.782	-29.1248	3	2	1797
65W15	SAT65	EL	2011-10-10	-31.2848	30.004	3	2814	187.14	-14.9843	3	2	1798
65W15	SAT65	EL	2011-10-10	-31.2796	30.0085	27	2804	228.577	-169.414	3	2	1799
65W15	SAT65	EL	2011-10-10	-31.2833	30.0024	3	2813	239.825	-78.4285	3	2	1800
65W15	SAT65	EL	2011-10-10	-31.2893	30.0116	55	2819	295.214	156.032	3	2	1801
65W15	SAT65	EL	2011-10-10	-31.2783	30.0102	27	2805	326.386	44.6914	3	2	1802
65W15	SAT65	EL	2011-10-10	-31.282	30.0075	3	2811	336.913	100.001	3	2	1803
65W15	SAT65	EL	2011-10-10	-31.2798	30.0055	27	2812	526.42	-104.127	3	2	1804
65W15	SAT65	EL	2011-10-10	-31.2804	30.0134	3	2809	631.984	76.9089	3	2	1805
65W15	SAT65	EL	2011-10-10	-31.2857	30.0046	55	2817	697.161	-63.6144	3	2	1806
65W16	SAT65	EL	2011-10-18	-31.301	29.9548	36	3202	1.75555	-158.399	3	2	1807
65W16	SAT65	EL	2011-10-18	-31.301	29.9549	36	3200	3.96856	-999	3	2	1808
65W16	SAT65	EL	2011-10-19	-31.2905	29.9567	84	3213	3.96867	-67.0643	3	2	1809
65W16	SAT65	EL	2011-10-18	-31.301	29.9549	36	3201	5.55343	-111.602	3	2	1810
65W16	SAT65	EL	2011-10-19	-31.2895	29.9571	84	3216	6.92004	-18.4014	3	2	1811
65W16	SAT65	EL	2011-10-18	-31.301	29.9549	36	3203	7.92574	130.654	3	2	1812
65W16	SAT65	EL	2011-10-19	-31.2895	29.9572	84	3217	21.5141	-163.77	3	2	1813
65W16	SAT65	EL	2011-10-19	-31.2894	29.9568	84	3215	38.0972	105.406	3	2	1814
65W16	SAT65	EL	2011-10-19	-31.2907	29.9564	55	3212	41.0463	64.249	3	2	1815
65W16	SAT65	EL	2011-10-19	-31.2895	29.957	84	3218	43.1728	24.4496	3	2	1816
65W16	SAT65	EL	2011-10-18	-31.3006	29.9555	36	3205	78.984	172.728	3	2	1817
65W16	SAT65	EL	2011-10-18	-31.3011	29.9548	36	3204	90.1803	-170.852	3	2	1818
65W16	SAT65	EL	2011-10-19	-31.2905	29.9567	84	3214	132.47	2.99417	3	2	1819
65W16	SAT65	EL	2011-10-18	-31.3011	29.955	36	3206	170.084	-176.616	3	2	1820
65W16	SAT65	EL	2011-10-18	-31.3001	29.9561	36	3207	170.56	-58.7157	3	2	1821
65W16	SAT65	EL	2011-10-19	-31.2921	29.9563	55	3211	176.638	8.22446	3	2	1822
65W16	SAT65	EL	2011-10-18	-31.2987	29.9558	36	3208	198.028	34.2138	3	2	1823
65W16	SAT65	EL	2011-10-19	-31.2892	29.9567	84	3219	201.677	162.126	3	2	1824
65W16	SAT65	EL	2011-10-19	-31.2944	29.9565	84	3210	273.853	-6.59183	3	2	1825
65W16	SAT65	EL	2011-10-19	-31.2972	29.9565	36	3209	330.79	-20.2308	3	2	1826
65W17	SAT65	EL	2011-10-18	-31.301	29.9548	36	3202	1.75555	-158.399	3	2	1827
65W17	SAT65	EL	2011-10-18	-31.301	29.9549	36	3200	3.96856	-999	3	2	1828
65W17	SAT65	EL	2011-10-19	-31.2905	29.9567	84	3213	3.96867	-67.0643	3	2	1829
65W17	SAT65	EL	2011-10-18	-31.301	29.9549	36	3201	5.55343	-111.602	3	2	1830
65W17	SAT65	EL	2011-10-19	-31.2895	29.9571	84	3216	6.92004	-18.4014	3	2	1831
65W17	SAT65	EL	2011-10-18	-31.301	29.9549	36	3203	7.92574	130.654	3	2	1832
65W17	SAT65	EL	2011-10-19	-31.2895	29.9572	84	3217	21.5141	-163.77	3	2	1833
65W17	SAT65	EL	2011-10-19	-31.2894	29.9568	84	3215	38.0972	105.406	3	2	1834
65W17	SAT65	EL	2011-10-19	-31.2907	29.9564	55	3212	41.0463	64.249	3	2	1835
65W17	SAT65	EL	2011-10-19	-31.2895	29.957	84	3218	43.1728	24.4496	3	2	1836
65W17	SAT65	EL	2011-10-18	-31.3006	29.9555	36	3205	78.984	172.728	3	2	1837
65W17	SAT65	EL	2011-10-18	-31.3011	29.9548	36	3204	90.1803	-170.852	3	2	1838
65W17	SAT65	EL	2011-10-19	-31.2905	29.9567	84	3214	132.47	2.99417	3	2	1839
65W17	SAT65	EL	2011-10-18	-31.3011	29.955	36	3206	170.084	-176.616	3	2	1840
65W17	SAT65	EL	2011-10-18	-31.3001	29.9561	36	3207	170.56	-58.7157	3	2	1841
65W17	SAT65	EL	2011-10-19	-31.2921	29.9563	55	3211	176.638	8.22446	3	2	1842
65W17	SAT65	EL	2011-10-18	-31.2987	29.9558	36	3208	198.028	34.2138	3	2	1843
65W17	SAT65	EL	2011-10-19	-31.2892	29.9567	84	3219	201.677	162.126	3	2	1844
65W17	SAT65	EL	2011-10-19	-31.2944	29.9565	84	3210	273.853	-6.59183	3	2	1845
65W17	SAT65	EL	2011-10-19	-31.2972	29.9565	36	3209	330.79	-20.2308	3	2	1846
65W18	SAT65	EL	2011-10-22	-31.3004	29.9581	36	3400	1.65233	-999	2	1	1847
65W18	SAT65	EL	2011-10-23	-31.3039	29.959	36	3407	3.4078	-162.35	2	1	1848
65W18	SAT65	EL	2011-10-23	-31.3039	29.959	36	3408	3.4078	-180	2	1	1849
65W18	SAT65	EL	2011-10-23	-31.3004	29.9581	36	3401	10.5298	-48.9199	2	1	1850
65W18	SAT65	EL	2011-10-23	-31.3004	29.958	36	3402	13.025	-168.625	2	1	1851
65W18	SAT65	EL	2011-10-23	-31.3039	29.9588	36	3406	19.8315	-107.651	2	1	1852
65W18	SAT65	EL	2011-10-23	-31.3041	29.965	36	3416	35.881	-160.895	2	1	1853
65W18	SAT65	EL	2011-10-23	-31.3043	29.9648	36	3415	36.1165	-20.7875	2	1	1854
65W18	SAT65	EL	2011-10-23	-31.3004	29.9581	36	3403	62.0799	125.926	2	1	1855
65W18	SAT65	EL	2011-10-23	-31.3049	29.9614	36	3412	85.714	11.044	2	1	1856
65W18	SAT65	EL	2011-10-23	-31.304	29.9671	36	3419	99.794	-30.8283	2	1	1857
65W18	SAT65	EL	2011-10-23	-31.3037	29.9661	36	3418	110.835	42.3687	2	1	1858
65W18	SAT65	EL	2011-10-23	-31.3027	29.9588	36	3405	140.345	17.5908	2	1	1859
65W18	SAT65	EL	2011-10-23	-31.3053	29.9622	36	3413	144.437	-1.59138	2	1	1860
65W18	SAT65	EL	2011-10-23	-31.3044	29.9601	36	3411	147.91	54.4136	2	1	1861
65W18	SAT65	EL	2011-10-23	-31.3043	29.9647	36	3417	152.146	-155.278	2	1	1862
65W18	SAT65	EL	2011-10-23	-31.3039	29.959	36	3409	183.339	105.787	2	1	1863
65W18	SAT65	EL	2011-10-23	-31.3053	29.9585	36	3410	198.993	-138.738	2	1	1864
65W18	SAT65	EL	2011-10-23	-31.3009	29.9581	36	3404	233.396	-15.9687	2	1	1865
65W18	SAT65	EL	2011-10-23	-31.3059	29.9633	36	3414	239.335	-80.5791	2	1	1866
65W19	SAT65	EL	2011-10-27	-31.2984	29.9733	36	3614	0	-999	2	1	1867
65W19	SAT65	EL	2011-10-27	-31.2936	29.972	36	3608	5.51132	-173.881	2	1	1868
65W19	SAT65	EL	2011-10-27	-31.2937	29.972	36	3610	6.23664	162.319	2	1	1869
65W19	SAT65	EL	2011-10-27	-31.2964	29.9735	36	3619	8.24746	-175.578	2	1	1870
65W19	SAT65	EL	2011-10-27	-31.2936	29.972	36	3609	9.47022	143.485	2	1	1871
65W19	SAT65	EL	2011-10-27	-31.2984	29.9733	36	3615	13.1584	-999	2	1	1872
65W19	SAT65	EL	2011-10-27	-31.2992	29.9729	36	3617	68.5448	-25.9988	2	1	1873
65W19	SAT65	EL	2011-10-27	-31.2985	29.9732	36	3616	89.7122	-20.4485	2	1	1874
65W19	SAT65	EL	2011-10-27	-31.2928	29.975	36	3601	124.831	97.9091	2	1	1875
65W19	SAT65	EL	2011-10-27	-31.2931	29.9738	36	3600	129.151	-999	2	1	1876
65W19	SAT65	EL	2011-10-27	-31.2936	29.972	36	3611	135.988	87.4077	2	1	1877
65W19	SAT65	EL	2011-10-27	-31.2939	29.9733	36	3612	272.612	53.0024	2	1	1878
65W19	SAT65	EL	2011-10-27	-31.2925	29.9746	36	3607	300.231	179.676	2	1	1879
65W19	SAT65	EL	2011-10-27	-31.2966	29.9682	36	3603	301.268	-68.8365	2	1	1880
65W19	SAT65	EL	2011-10-27	-31.2991	29.9684	36	3604	314.43	-150.415	2	1	1881
65W19	SAT65	EL	2011-10-27	-31.296	29.9744	36	3613	320.246	44.3548	2	1	1882
65W19	SAT65	EL	2011-10-27	-31.2938	29.9714	36	3606	362.721	36.9109	2	1	1883
65W19	SAT65	EL	2011-10-27	-31.2967	29.9697	36	3605	388.669	0.868745	2	1	1884
65W19	SAT65	EL	2011-10-27	-31.2998	29.973	36	3618	414.882	-166.337	2	1	1885
65W19	SAT65	EL	2011-10-27	-31.2938	29.9751	36	3602	784.83	70.7929	2	1	1886
65W2	SAT65	EL	2011-08-17	-31.2458	30.0002	34	209	6.51721	11.8007	1	2	1887
65W2	SAT65	EL	2011-08-17	-31.2459	30.0001	34	208	15.8614	36.8651	1	2	1888
65W2	SAT65	EL	2011-08-17	-31.2505	30.0002	34	206	64.0484	29.0587	1	2	1889
65W2	SAT65	EL	2011-08-17	-31.2482	29.9813	85	200	115.258	-999	1	2	1890
65W2	SAT65	EL	2011-08-17	-31.256	29.9989	33	214	141.302	-59.9808	1	2	1891
65W2	SAT65	EL	2011-08-17	-31.2648	30.0138	34	219	173.96	-16.7122	1	2	1892
65W2	SAT65	EL	2011-08-17	-31.2598	30.0032	33	216	252.458	-10.2868	1	2	1893
65W2	SAT65	EL	2011-08-17	-31.2458	30.0003	34	210	295.218	88.9004	1	2	1894
65W2	SAT65	EL	2011-08-17	-31.2424	29.9949	15	203	469.483	-27.0523	1	2	1895
65W2	SAT65	EL	2011-08-17	-31.2631	30.0095	34	218	494.711	-10.7051	1	2	1896
65W2	SAT65	EL	2011-08-17	-31.256	30.0038	33	213	508.094	61.4627	1	2	1897
65W2	SAT65	EL	2011-08-17	-31.2606	30.0054	33	217	509.149	12.4637	1	2	1898
65W2	SAT65	EL	2011-08-17	-31.2509	29.9997	34	207	596.817	137.233	1	2	1899
65W2	SAT65	EL	2011-08-17	-31.257	29.9982	33	215	611.4	-86.8165	1	2	1900
65W2	SAT65	EL	2011-08-17	-31.2512	30.0069	33	212	652.803	78.1883	1	2	1901
65W2	SAT65	EL	2011-08-17	-31.2477	30.002	34	211	653.326	-11.0176	1	2	1902
65W2	SAT65	EL	2011-08-17	-31.2398	29.9982	34	204	697.686	93.9305	1	2	1903
65W2	SAT65	EL	2011-08-17	-31.2491	29.9817	24	201	773.36	-114.351	1	2	1904
65W2	SAT65	EL	2011-08-17	-31.2443	30.0024	34	205	784.283	56.3564	1	2	1905
65W2	SAT65	EL	2011-08-17	-31.2444	29.9868	15	202	866.116	31.4862	1	2	1906
65W20	SAT65	EL	2011-10-31	-31.2997	29.9703	36	3810	4.33992	-151.408	3	1	1907
65W20	SAT65	EL	2011-10-31	-31.2997	29.9703	36	3809	6.51293	-163.669	3	1	1908
65W20	SAT65	EL	2011-10-31	-31.2997	29.9702	36	3808	16.618	-90.5253	3	1	1909
65W20	SAT65	EL	2011-10-31	-31.3034	29.9858	84	3819	19.0384	-58.9356	3	1	1910
65W20	SAT65	EL	2011-10-31	-31.2997	29.9703	36	3811	24.2337	169.335	3	1	1911
65W20	SAT65	EL	2011-10-31	-31.2924	29.9779	36	3802	102.367	104.986	3	1	1912
65W20	SAT65	EL	2011-10-31	-31.2926	29.9769	36	3801	105.638	3.38841	3	1	1913
65W20	SAT65	EL	2011-10-31	-31.2985	29.9707	36	3807	148.903	-97.5309	3	1	1914
65W20	SAT65	EL	2011-10-31	-31.3026	29.9727	36	3815	178.745	19.8916	3	1	1915
65W20	SAT65	EL	2011-10-31	-31.2994	29.9725	36	3806	209.089	58.1481	3	1	1916
65W20	SAT65	EL	2011-10-31	-31.2985	29.9744	36	3805	228.117	31.0763	3	1	1917
65W20	SAT65	EL	2011-10-31	-31.3019	29.9727	36	3813	229.52	118.383	3	1	1918
65W20	SAT65	EL	2011-10-31	-31.3023	29.9705	36	3814	231.789	-156.384	3	1	1919
65W20	SAT65	EL	2011-10-31	-31.2932	29.9778	36	3803	280.956	24.8703	3	1	1920
65W20	SAT65	EL	2011-10-31	-31.2996	29.9702	36	3812	375.704	171.486	3	1	1921
65W20	SAT65	EL	2011-10-31	-31.2935	29.9731	36	3800	405.567	-999	3	1	1922
65W20	SAT65	EL	2011-10-31	-31.2995	29.975	36	3817	437.572	81.9906	3	1	1923
65W20	SAT65	EL	2011-10-31	-31.2953	29.9765	84	3804	440.037	2.28173	3	1	1924
65W20	SAT65	EL	2011-10-31	-31.3033	29.9742	84	3816	468.669	-108.472	3	1	1925
65W20	SAT65	EL	2011-10-31	-31.2997	29.9793	84	3818	808.792	31.5366	3	1	1926
65W21	SAT65	EL	2011-11-04	-31.2979	29.9738	36	4006	0	-999	3	2	1927
65W21	SAT65	EL	2011-11-04	-31.3056	29.9948	55	4014	1.75588	-134.522	3	2	1928
65W21	SAT65	EL	2011-11-04	-31.3056	29.9947	55	4015	8.8133	-166.584	3	2	1929
65W21	SAT65	EL	2011-11-04	-31.3057	29.9948	55	4016	8.8133	180	3	2	1930
65W21	SAT65	EL	2011-11-04	-31.3057	29.9947	55	4012	14.4492	-94.8268	3	2	1931
65W21	SAT65	EL	2011-11-04	-31.3058	29.9946	55	4013	19.7391	178.892	3	2	1932
65W21	SAT65	EL	2011-11-04	-31.2979	29.974	36	4004	22.2607	124.866	3	2	1933
65W21	SAT65	EL	2011-11-04	-31.305	29.9961	84	4018	31.5648	-138.191	3	2	1934
65W21	SAT65	EL	2011-11-04	-31.3049	29.9958	84	4019	42.0944	157.978	3	2	1935
65W21	SAT65	EL	2011-11-04	-31.2977	29.9742	36	4005	48.4228	-167.987	3	2	1936
65W21	SAT65	EL	2011-11-04	-31.3056	29.9947	55	4017	160.333	135.759	3	2	1937
65W21	SAT65	EL	2011-11-04	-31.307	29.996	55	4011	202.783	-104.521	3	2	1938
65W21	SAT65	EL	2011-11-04	-31.2987	29.9775	84	4003	365.178	76.9575	3	2	1939
65W21	SAT65	EL	2011-11-04	-31.2932	29.9756	36	4001	491.725	68.3332	3	2	1940
65W21	SAT65	EL	2011-11-04	-31.296	29.972	36	4000	501.756	-999	3	2	1941
65W21	SAT65	EL	2011-11-04	-31.2979	29.9738	36	4007	505.589	-999	3	2	1942
65W21	SAT65	EL	2011-11-04	-31.2949	29.9799	36	4002	515.525	93.1096	3	2	1943
65W21	SAT65	EL	2011-11-04	-31.309	29.991	55	4010	564.213	-66.5982	3	2	1944
65W21	SAT65	EL	2011-11-04	-31.2997	29.9782	84	4008	745.065	13.1334	3	2	1945
65W21	SAT65	EL	2011-11-04	-31.3035	29.9839	84	4009	984.851	3.35926	3	2	1946
65W22	SAT65	EL	2011-11-08	-31.3075	29.9647	36	4207	1.65225	-130.652	1	1	1947
65W22	SAT65	EL	2011-11-08	-31.3075	29.9647	36	4206	2.53629	-49.3484	1	1	1948
65W22	SAT65	EL	2011-11-08	-31.3075	29.9647	36	4205	5.16329	-151.867	1	1	1949
65W22	SAT65	EL	2011-11-09	-31.3105	29.9658	36	4215	26.1999	132.569	1	1	1950
65W22	SAT65	EL	2011-11-09	-31.3107	29.966	36	4216	30.1815	-90.3351	1	1	1951
65W22	SAT65	EL	2011-11-09	-31.3105	29.9662	36	4217	38.4723	-35.4663	1	1	1952
65W22	SAT65	EL	2011-11-08	-31.3118	29.9665	36	4212	41.9778	128.773	1	1	1953
65W22	SAT65	EL	2011-11-08	-31.3115	29.9659	36	4211	68.7726	-7.64333	1	1	1954
65W22	SAT65	EL	2011-11-09	-31.3109	29.9667	36	4219	70.3867	-134.416	1	1	1955
65W22	SAT65	EL	2011-11-08	-31.3119	29.9661	36	4213	74.8966	85.1534	1	1	1956
65W22	SAT65	EL	2011-11-09	-31.3102	29.9663	36	4218	95.6122	146.693	1	1	1957
65W22	SAT65	EL	2011-11-09	-31.3114	29.9658	36	4214	100.195	25.3766	1	1	1958
65W22	SAT65	EL	2011-11-08	-31.311	29.9652	36	4210	104.462	-37.1401	1	1	1959
65W22	SAT65	EL	2011-11-08	-31.3094	29.9622	36	4203	110.619	122.443	1	1	1960
65W22	SAT65	EL	2011-11-08	-31.3095	29.9647	36	4209	183.476	-12.3532	1	1	1961
65W22	SAT65	EL	2011-11-08	-31.3075	29.9647	36	4208	242.629	88.7821	1	1	1962
65W22	SAT65	EL	2011-11-08	-31.3085	29.9625	36	4204	263.475	45.6035	1	1	1963
65W22	SAT65	EL	2011-11-08	-31.3028	29.9778	84	4200	463.359	-999	1	1	1964
65W22	SAT65	EL	2011-11-08	-31.3079	29.9681	36	4202	632.674	38.5636	1	1	1965
65W22	SAT65	EL	2011-11-08	-31.3006	29.9741	36	4201	1082.52	-89.5723	1	1	1966
65W23	SAT65	EL	2011-11-13	-31.3095	29.9743	36	4405	1.75558	152.284	2	1	1967
65W23	SAT65	EL	2011-11-13	-31.3095	29.9744	36	4406	3.97422	-30.9621	2	1	1968
65W23	SAT65	EL	2011-11-13	-31.3094	29.9744	36	4407	4.06306	61.1755	2	1	1969
65W23	SAT65	EL	2011-11-12	-31.3068	29.9698	36	4400	9.16715	-999	2	1	1970
65W23	SAT65	EL	2011-11-13	-31.308	29.9748	36	4411	10.5821	-22.1644	2	1	1971
65W23	SAT65	EL	2011-11-13	-31.3096	29.9745	36	4404	21.464	86.9739	2	1	1972
65W23	SAT65	EL	2011-11-13	-31.3095	29.9744	36	4408	32.1253	-91.3839	2	1	1973
65W23	SAT65	EL	2011-11-13	-31.3083	29.9748	36	4410	36.1244	-9.74713	2	1	1974
65W23	SAT65	EL	2011-11-13	-31.3136	29.9733	36	4416	46.4308	91.1527	2	1	1975
65W23	SAT65	EL	2011-11-13	-31.308	29.9748	36	4412	98.4103	31.4939	2	1	1976
65W23	SAT65	EL	2011-11-13	-31.3092	29.9746	36	4409	110.888	-16.296	2	1	1977
65W23	SAT65	EL	2011-11-13	-31.3103	29.9756	36	4419	177.783	88.7107	2	1	1978
65W23	SAT65	EL	2011-11-13	-31.311	29.974	36	4418	179.624	43.7287	2	1	1979
65W23	SAT65	EL	2011-11-13	-31.3072	29.975	36	4413	229.884	118.727	2	1	1980
65W23	SAT65	EL	2011-11-12	-31.3076	29.9758	36	4403	265.879	80.6992	2	1	1981
65W23	SAT65	EL	2011-11-12	-31.3062	29.9738	84	4402	274.245	49.9457	2	1	1982
65W23	SAT65	EL	2011-11-13	-31.3133	29.973	36	4417	295.271	59.4765	2	1	1983
65W23	SAT65	EL	2011-11-13	-31.3084	29.9767	55	4414	336.924	50.9157	2	1	1984
65W23	SAT65	EL	2011-11-12	-31.3068	29.9697	36	4401	431.597	-148.905	2	1	1985
65W23	SAT65	EL	2011-11-13	-31.3112	29.9766	36	4415	441.436	48.0843	2	1	1986
65W24	SAT65	EL	2011-11-17	-31.3089	29.9918	55	4603	0	-999	1	2	1987
65W24	SAT65	EL	2011-11-17	-31.3063	29.9795	84	4619	1.7557	-142.453	1	2	1988
65W24	SAT65	EL	2011-11-17	-31.3089	29.9918	55	4602	2.69523	-168.89	1	2	1989
65W24	SAT65	EL	2011-11-17	-31.3088	29.9918	55	4600	6.01424	-999	1	2	1990
65W24	SAT65	EL	2011-11-17	-31.3063	29.9796	84	4618	6.51305	-164.361	1	2	1991
65W24	SAT65	EL	2011-11-17	-31.3088	29.9918	55	4601	6.91289	29.54	1	2	1992
65W24	SAT65	EL	2011-11-17	-31.3086	29.9772	84	4613	14.7691	-126.924	1	2	1993
65W24	SAT65	EL	2011-11-17	-31.3086	29.978	84	4612	80.8881	-79.2928	1	2	1994
65W24	SAT65	EL	2011-11-17	-31.3117	29.9791	84	4610	81.2445	21.066	1	2	1995
65W24	SAT65	EL	2011-11-17	-31.3087	29.9773	84	4614	89.4342	-88.635	1	2	1996
65W24	SAT65	EL	2011-11-17	-31.3138	29.9821	84	4608	129.627	101.463	1	2	1997
65W24	SAT65	EL	2011-11-17	-31.3087	29.9759	36	4616	137.119	-127.027	1	2	1998
65W24	SAT65	EL	2011-11-17	-31.3089	29.9918	55	4604	164.378	-999	1	2	1999
[truncated: 16,011 more rows]

## Sheet: Eland
Walk	Unit_ID	Species	PointDATE	Longitude	Latitude	ID_F	ID_NR	STEPLENGTH	TURNANGLE	Success	View
64W28	SAT64EL	EL	2011-12-02	-31.2538	30.0401	34	5412	3.91742	-179.613	1	1
64W28	SAT64EL	EL	2011-12-02	-31.2538	30.04	34	5410	5.16912	31.2717	1	1
64W28	SAT64EL	EL	2011-12-02	-31.2534	30.0408	34	5407	6.5183	58.8335	1	1
64W28	SAT64EL	EL	2011-12-02	-31.2538	30.04	34	5411	7.98421	150.175	1	1
64W28	SAT64EL	EL	2011-12-02	-31.2533	30.0407	34	5408	12.536	-143.815	1	1
64W28	SAT64EL	EL	2011-12-02	-31.2532	30.0411	55	5405	21.1675	-170.562	1	1
64W28	SAT64EL	EL	2011-12-02	-31.2533	30.041	55	5406	22.1931	27.8178	1	1
64W28	SAT64EL	EL	2011-12-01	-31.2576	30.0404	55	5401	24.8572	46.6421	1	1
64W28	SAT64EL	EL	2011-12-01	-31.2558	30.0391	34	5403	27.6272	82.3587	1	1
64W28	SAT64EL	EL	2011-12-02	-31.2538	30.04	34	5413	38.3797	60.8003	1	1
64W28	SAT64EL	EL	2011-12-02	-31.2531	30.0366	34	5416	84.3189	23.3514	1	1
64W28	SAT64EL	EL	2011-12-02	-31.2534	30.0408	34	5409	88.7828	75.0107	1	1
64W28	SAT64EL	EL	2011-12-01	-31.2575	30.0413	55	5400	93.5879	-999	1	1
64W28	SAT64EL	EL	2011-12-01	-31.2574	30.0402	55	5402	227.187	21.4909	1	1
64W28	SAT64EL	EL	2011-12-02	-31.248	30.035	34	5419	256.554	-68.3645	1	1
64W28	SAT64EL	EL	2011-12-02	-31.2499	30.0365	34	5418	278.187	-42.6191	1	1
64W28	SAT64EL	EL	2011-12-01	-31.2556	30.0393	34	5404	350.206	-22.8507	1	1
64W28	SAT64EL	EL	2011-12-02	-31.2535	30.0359	34	5417	439.266	131.019	1	1
64W28	SAT64EL	EL	2011-12-02	-31.2536	30.0397	34	5414	642.808	64.1747	1	1
64W28	SAT64EL	EL	2011-12-02	-31.2483	30.0403	29	5415	692.78	-152.023	1	1
64W30	SAT64EL	EL	2011-12-10	-31.2972	30.0035	84	5809	1.75616	8.46593	1	1
64W30	SAT64EL	EL	2011-12-10	-31.2996	29.997	84	5817	4.34062	36.3487	1	1
64W30	SAT64EL	EL	2011-12-10	-31.2945	30.0046	84	5802	8.24899	174.582	1	1
64W30	SAT64EL	EL	2011-12-10	-31.2971	30.0037	84	5808	13.8908	105.362	1	1
64W30	SAT64EL	EL	2011-12-10	-31.2944	30.0045	84	5803	18.2586	-139.698	1	1
64W30	SAT64EL	EL	2011-12-10	-31.2946	30.0045	84	5804	33.6973	48.3616	1	1
64W30	SAT64EL	EL	2011-12-10	-31.2946	30.0041	84	5805	56.2957	98.3642	1	1
64W30	SAT64EL	EL	2011-12-10	-31.2991	29.996	84	5816	113.072	67.6208	1	1
64W30	SAT64EL	EL	2011-12-10	-31.3001	30.0007	84	5812	177.012	-28.606	1	1
64W30	SAT64EL	EL	2011-12-10	-31.2928	30.0043	84	5801	201.987	55.2739	1	1
64W30	SAT64EL	EL	2011-12-10	-31.2942	30.0041	84	5806	203.596	-131.5	1	1
64W30	SAT64EL	EL	2011-12-10	-31.2972	30.0035	84	5810	203.82	-41.967	1	1
64W30	SAT64EL	EL	2011-12-10	-31.2954	30.0027	84	5807	230.133	-67.064	1	1
64W30	SAT64EL	EL	2011-12-10	-31.3004	29.9941	84	5815	248.489	146.65	1	1
64W30	SAT64EL	EL	2011-12-10	-31.2919	30.0022	55	5800	253.091	-999	1	1
64W30	SAT64EL	EL	2011-12-10	-31.2983	30.002	84	5811	258.451	-14.9414	1	1
64W30	SAT64EL	EL	2011-12-10	-31.3002	29.9969	84	5814	283.273	-28.2158	1	1
64W30	SAT64EL	EL	2011-12-10	-31.2996	29.997	84	5818	284.444	35.385	1	1
64W30	SAT64EL	EL	2011-12-10	-31.3019	29.9964	84	5819	377.874	-7.33493	1	1
64W30	SAT64EL	EL	2011-12-10	-31.3016	30.0005	84	5813	413.66	109.245	1	1
64W44	SAT64EL	EL	2012-02-07	-31.2451	29.9743	31	8616	1.75698	-3.06068e-05	1	1
64W44	SAT64EL	EL	2012-02-06	-31.2508	29.9744	38	8605	2.60582	-42.3925	1	1
64W44	SAT64EL	EL	2012-02-06	-31.2508	29.9744	38	8604	4.08966	-78.2226	1	1
64W44	SAT64EL	EL	2012-02-06	-31.2508	29.9744	38	8606	4.34076	-161.482	1	1
64W44	SAT64EL	EL	2012-02-07	-31.2452	29.9743	31	8614	7.22023	-153.582	1	1
64W44	SAT64EL	EL	2012-02-07	-31.2451	29.9744	31	8615	8.57821	-163.548	1	1
64W44	SAT64EL	EL	2012-02-07	-31.2434	29.9748	31	8619	9.09421	-77.0959	1	1
64W44	SAT64EL	EL	2012-02-07	-31.2451	29.9744	31	8613	11.8457	174.937	1	1
64W44	SAT64EL	EL	2012-02-07	-31.2452	29.9742	31	8612	19.6221	3.48043	1	1
64W44	SAT64EL	EL	2012-02-06	-31.2523	29.9774	10	8600	29.8711	-999	1	1
64W44	SAT64EL	EL	2012-02-06	-31.2508	29.9744	38	8607	36.7104	1.88635	1	1
64W44	SAT64EL	EL	2012-02-06	-31.2472	29.9713	38	8609	71.7445	96.7147	1	1
64W44	SAT64EL	EL	2012-02-07	-31.2437	29.9754	31	8618	72.1563	-88.8947	1	1
64W44	SAT64EL	EL	2012-02-06	-31.2459	29.9733	31	8611	121.59	-0.9545	1	1
64W44	SAT64EL	EL	2012-02-06	-31.2521	29.9773	6	8601	153.022	-55.3315	1	1
64W44	SAT64EL	EL	2012-02-06	-31.2518	29.9759	38	8602	185.162	98.569	1	1
64W44	SAT64EL	EL	2012-02-06	-31.2469	29.9719	38	8610	191.978	-10.1361	1	1
64W44	SAT64EL	EL	2012-02-07	-31.2451	29.9743	31	8617	209.377	124.589	1	1
64W44	SAT64EL	EL	2012-02-06	-31.2504	29.9766	38	8603	235.734	-124.776	1	1
64W44	SAT64EL	EL	2012-02-06	-31.2505	29.9742	38	8608	499.002	-14.927	1	1
64W47	SAT64EL	EL	2012-02-19	-31.2442	29.9782	31	9214	18.153	-118.2	1	1
64W47	SAT64EL	EL	2012-02-19	-31.2442	29.9787	31	9213	58.4994	-119.996	1	1
64W47	SAT64EL	EL	2012-02-19	-31.2447	29.9745	31	9200	114.557	-999	1	1
64W47	SAT64EL	EL	2012-02-19	-31.2439	29.9765	31	9205	149.977	24.4808	1	1
64W47	SAT64EL	EL	2012-02-19	-31.2443	29.9782	31	9215	150.626	145.072	1	1
64W47	SAT64EL	EL	2012-02-19	-31.2472	29.9775	31	9210	155.826	-18.4081	1	1
64W47	SAT64EL	EL	2012-02-19	-31.2437	29.9731	31	9203	183.183	42.5626	1	1
64W47	SAT64EL	EL	2012-02-19	-31.245	29.9772	31	9206	194.392	30.1297	1	1
64W47	SAT64EL	EL	2012-02-19	-31.2466	29.9772	31	9207	218.037	142.605	1	1
64W47	SAT64EL	EL	2012-02-19	-31.2485	29.9773	38	9211	256.715	173.138	1	1
64W47	SAT64EL	EL	2012-02-19	-31.2431	29.9702	31	9219	266.996	-164.758	1	1
64W47	SAT64EL	EL	2012-02-19	-31.2452	29.971	31	9218	270.653	65.4276	1	1
64W47	SAT64EL	EL	2012-02-19	-31.246	29.9731	31	9202	282.689	123.419	1	1
64W47	SAT64EL	EL	2012-02-19	-31.2425	29.9742	31	9204	287.118	84.039	1	1
64W47	SAT64EL	EL	2012-02-19	-31.2463	29.9773	31	9212	296.255	29.2336	1	1
64W47	SAT64EL	EL	2012-02-19	-31.2452	29.9759	31	9208	307.581	117.127	1	1
64W47	SAT64EL	EL	2012-02-19	-31.2445	29.9756	31	9201	318.312	152.947	1	1
64W47	SAT64EL	EL	2012-02-19	-31.2455	29.9742	31	9217	325.581	42.2799	1	1
64W47	SAT64EL	EL	2012-02-19	-31.2447	29.9789	31	9209	325.703	125.782	1	1
64W47	SAT64EL	EL	2012-02-19	-31.2438	29.9769	31	9216	358.989	-63.1532	1	1
64W51	SAT64EL	EL	2012-03-07	-31.2942	30.0077	84	10017	2.60565	174.891	1	1
64W51	SAT64EL	EL	2012-03-07	-31.2921	30.0093	84	10011	2.62961	1.70799	1	1
64W51	SAT64EL	EL	2012-03-07	-31.2922	30.0093	84	10010	2.69575	98.6885	1	1
64W51	SAT64EL	EL	2012-03-07	-31.2921	30.0093	84	10009	2.6958	-116.738	1	1
64W51	SAT64EL	EL	2012-03-07	-31.2899	30.0116	55	10002	3.91535	-128.596	1	1
64W51	SAT64EL	EL	2012-03-07	-31.2942	30.0077	84	10018	3.97561	16.6627	1	1
64W51	SAT64EL	EL	2012-03-07	-31.2922	30.0093	84	10008	4.3003	103.352	1	1
64W51	SAT64EL	EL	2012-03-07	-31.2941	30.0077	84	10019	9.17018	169.968	1	1
64W51	SAT64EL	EL	2012-03-07	-31.2899	30.0117	55	10003	12.6254	-168.881	1	1
64W51	SAT64EL	EL	2012-03-07	-31.2921	30.0093	84	10012	32.9023	136.088	1	1
64W51	SAT64EL	EL	2012-03-07	-31.2926	30.0089	84	10014	70.7213	-106.644	1	1
64W51	SAT64EL	EL	2012-03-07	-31.2893	30.0111	55	10000	76.2209	-999	1	1
64W51	SAT64EL	EL	2012-03-07	-31.293	30.0094	84	10015	82.1705	112.636	1	1
64W51	SAT64EL	EL	2012-03-07	-31.2922	30.0096	84	10013	90.3375	136.042	1	1
64W51	SAT64EL	EL	2012-03-07	-31.2911	30.0121	55	10005	95.2869	-130.058	1	1
64W51	SAT64EL	EL	2012-03-07	-31.2891	30.0118	55	10001	97.4828	117.55	1	1
64W51	SAT64EL	EL	2012-03-07	-31.2905	30.0126	55	10006	117.079	-142.514	1	1
64W51	SAT64EL	EL	2012-03-07	-31.2933	30.0087	84	10016	154.17	-11.6877	1	1
64W51	SAT64EL	EL	2012-03-07	-31.2899	30.0116	55	10004	159.548	-91.1915	1	1
64W51	SAT64EL	EL	2012-03-07	-31.2908	30.0115	55	10007	276.589	-13.8667	1	1
64W7	SAT64EL	EL	2011-09-05	-31.2984	29.9826	84	1205	0	-999	1	1
64W7	SAT64EL	EL	2011-09-05	-31.2984	29.9826	84	1204	1.65262	23.4855	1	1
64W7	SAT64EL	EL	2011-09-05	-31.2982	29.9825	84	1200	9.44721	-999	1	1
64W7	SAT64EL	EL	2011-09-05	-31.2982	29.9825	84	1201	11.24	92.5098	1	1
64W7	SAT64EL	EL	2011-09-05	-31.2984	29.9827	84	1203	15.0909	124.391	1	1
64W7	SAT64EL	EL	2011-09-05	-31.2934	29.9772	36	1212	15.9268	-23.8232	1	1
64W7	SAT64EL	EL	2011-09-05	-31.2927	29.9758	36	1218	16.8097	157.111	1	1
64W7	SAT64EL	EL	2011-09-05	-31.2938	29.9766	36	1209	20.154	-46.2511	1	1
64W7	SAT64EL	EL	2011-09-05	-31.2925	29.9758	36	1217	20.1628	-71.2513	1	1
64W7	SAT64EL	EL	2011-09-05	-31.2983	29.9825	84	1202	26.4652	-85.2301	1	1
64W7	SAT64EL	EL	2011-09-05	-31.2929	29.9817	17	1214	94.0494	-101.522	1	1
64W7	SAT64EL	EL	2011-09-05	-31.2926	29.9758	36	1219	109.721	-111.832	1	1
64W7	SAT64EL	EL	2011-09-05	-31.2922	29.9814	17	1215	112.601	36.3493	1	1
64W7	SAT64EL	EL	2011-09-05	-31.2925	29.9764	36	1211	138.325	149.71	1	1
64W7	SAT64EL	EL	2011-09-05	-31.2928	29.9776	36	1208	166.017	-96.7109	1	1
64W7	SAT64EL	EL	2011-09-05	-31.294	29.9766	36	1210	179.192	179.212	1	1
64W7	SAT64EL	EL	2011-09-05	-31.2945	29.9794	36	1207	276.776	-7.22525	1	1
64W7	SAT64EL	EL	2011-09-05	-31.2935	29.9773	36	1213	456.52	-39.2459	1	1
64W7	SAT64EL	EL	2011-09-05	-31.2984	29.9826	84	1206	574.144	-999	1	1
64W7	SAT64EL	EL	2011-09-05	-31.2913	29.9817	17	1216	623.814	-119.73	1	1
65W22	SAT65	EL	2011-11-08	-31.3075	29.9647	36	4207	1.65225	-130.652	1	1
65W22	SAT65	EL	2011-11-08	-31.3075	29.9647	36	4206	2.53629	-49.3484	1	1
65W22	SAT65	EL	2011-11-08	-31.3075	29.9647	36	4205	5.16329	-151.867	1	1
65W22	SAT65	EL	2011-11-09	-31.3105	29.9658	36	4215	26.1999	132.569	1	1
65W22	SAT65	EL	2011-11-09	-31.3107	29.966	36	4216	30.1815	-90.3351	1	1
65W22	SAT65	EL	2011-11-09	-31.3105	29.9662	36	4217	38.4723	-35.4663	1	1
65W22	SAT65	EL	2011-11-08	-31.3118	29.9665	36	4212	41.9778	128.773	1	1
65W22	SAT65	EL	2011-11-08	-31.3115	29.9659	36	4211	68.7726	-7.64333	1	1
65W22	SAT65	EL	2011-11-09	-31.3109	29.9667	36	4219	70.3867	-134.416	1	1
65W22	SAT65	EL	2011-11-08	-31.3119	29.9661	36	4213	74.8966	85.1534	1	1
65W22	SAT65	EL	2011-11-09	-31.3102	29.9663	36	4218	95.6122	146.693	1	1
65W22	SAT65	EL	2011-11-09	-31.3114	29.9658	36	4214	100.195	25.3766	1	1
65W22	SAT65	EL	2011-11-08	-31.311	29.9652	36	4210	104.462	-37.1401	1	1
65W22	SAT65	EL	2011-11-08	-31.3094	29.9622	36	4203	110.619	122.443	1	1
65W22	SAT65	EL	2011-11-08	-31.3095	29.9647	36	4209	183.476	-12.3532	1	1
65W22	SAT65	EL	2011-11-08	-31.3075	29.9647	36	4208	242.629	88.7821	1	1
65W22	SAT65	EL	2011-11-08	-31.3085	29.9625	36	4204	263.475	45.6035	1	1
65W22	SAT65	EL	2011-11-08	-31.3028	29.9778	84	4200	463.359	-999	1	1
65W22	SAT65	EL	2011-11-08	-31.3079	29.9681	36	4202	632.674	38.5636	1	1
65W22	SAT65	EL	2011-11-08	-31.3006	29.9741	36	4201	1082.52	-89.5723	1	1
65W27	SAT65	EL	2011-11-29	-31.2666	30.0347	55	5207	2.53803	79.6189	1	1
65W27	SAT65	EL	2011-11-29	-31.2665	30.0347	55	5206	2.63042	172.402	1	1
65W27	SAT65	EL	2011-11-29	-31.2666	30.0347	55	5208	4.30139	161.948	1	1
65W27	SAT65	EL	2011-11-30	-31.263	30.038	7	5219	5.23481	-56.6442	1	1
65W27	SAT65	EL	2011-11-30	-31.2629	30.038	7	5216	6.91612	109.54	1	1
65W27	SAT65	EL	2011-11-29	-31.2629	30.039	55	5200	13.096	-999	1	1
65W27	SAT65	EL	2011-11-29	-31.2667	30.0348	55	5205	16.486	-38.5191	1	1
65W27	SAT65	EL	2011-11-30	-31.263	30.0378	7	5215	18.469	2.66619	1	1
65W27	SAT65	EL	2011-11-30	-31.2628	30.038	7	5218	18.7748	-169.019	1	1
65W27	SAT65	EL	2011-11-30	-31.263	30.038	7	5217	20.1715	-145.45	1	1
65W27	SAT65	EL	2011-11-29	-31.2665	30.0347	55	5209	36.6954	104.262	1	1
65W27	SAT65	EL	2011-11-29	-31.2662	30.0349	55	5212	41.0622	37.1855	1	1
65W27	SAT65	EL	2011-11-29	-31.2667	30.035	55	5210	89.7144	-40.7191	1	1
65W27	SAT65	EL	2011-11-29	-31.2675	30.0347	55	5204	97.0169	143.097	1	1
65W27	SAT65	EL	2011-11-29	-31.2667	30.0359	55	5211	118.081	-145.524	1	1
65W27	SAT65	EL	2011-11-30	-31.2641	30.0369	55	5214	155.81	-7.4516	1	1
65W27	SAT65	EL	2011-11-29	-31.2663	30.036	55	5203	198.266	27.3108	1	1
65W27	SAT65	EL	2011-11-29	-31.263	30.039	55	5201	255.648	37.1358	1	1
65W27	SAT65	EL	2011-11-29	-31.264	30.0368	55	5202	286.883	-43.6284	1	1
65W27	SAT65	EL	2011-11-30	-31.2659	30.0347	55	5213	313.009	67.8777	1	1
65W28	SAT65	EL	2011-12-04	-31.2917	30.0111	55	5412	3.97573	131.006	1	1
65W28	SAT65	EL	2011-12-04	-31.2911	30.011	84	5409	4.34112	179.063	1	1
65W28	SAT65	EL	2011-12-04	-31.2912	30.011	84	5410	6.23816	-140.768	1	1
65W28	SAT65	EL	2011-12-04	-31.2912	30.011	84	5408	8.75163	165.218	1	1
65W28	SAT65	EL	2011-12-03	-31.2867	30.0104	55	5401	16.0965	-33.4683	1	1
65W28	SAT65	EL	2011-12-04	-31.2909	30.0109	84	5407	36.4585	-139.241	1	1
65W28	SAT65	EL	2011-12-04	-31.2911	30.0112	55	5406	36.6038	110.965	1	1
65W28	SAT65	EL	2011-12-04	-31.2911	30.011	84	5411	69.2741	154.585	1	1
65W28	SAT65	EL	2011-12-04	-31.2917	30.0111	55	5413	88.0135	-96.6986	1	1
65W28	SAT65	EL	2011-12-04	-31.3026	29.9994	84	5418	98.8633	23.0375	1	1
65W28	SAT65	EL	2011-12-03	-31.2895	30.0124	55	5404	107.353	-153.145	1	1
65W28	SAT65	EL	2011-12-03	-31.2868	30.0104	55	5402	113.069	-31.5251	1	1
65W28	SAT65	EL	2011-12-04	-31.3025	29.9984	84	5419	126.735	34.6471	1	1
65W28	SAT65	EL	2011-12-03	-31.2851	30.012	55	5400	247.797	-999	1	1
65W28	SAT65	EL	2011-12-03	-31.2876	30.0109	55	5403	272.21	-9.89307	1	1
65W28	SAT65	EL	2011-12-04	-31.3019	30.0021	55	5417	290.21	55.9116	1	1
65W28	SAT65	EL	2011-12-04	-31.2886	30.0123	55	5405	320.327	-151.57	1	1
65W28	SAT65	EL	2011-12-04	-31.2994	30.0031	84	5416	322.606	-21.9676	1	1
65W28	SAT65	EL	2011-12-04	-31.2923	30.0107	55	5414	578.326	21.8474	1	1
65W28	SAT65	EL	2011-12-04	-31.2957	30.0067	84	5415	581.081	-6.10246	1	1
65W31	SAT65	EL	2011-12-16	-31.3124	29.9813	84	6019	2.62889	-107.994	1	1
65W31	SAT65	EL	2011-12-16	-31.3134	29.9822	84	6017	8.74955	-25.2158	1	1
65W31	SAT65	EL	2011-12-16	-31.3094	29.9907	55	6005	8.75012	-10.1191	1	1
65W31	SAT65	EL	2011-12-16	-31.3093	29.9907	55	6004	9.47057	20.4388	1	1
65W31	SAT65	EL	2011-12-16	-31.3089	29.9911	55	6000	37.8954	-999	1	1
65W31	SAT65	EL	2011-12-16	-31.309	29.9891	84	6010	38.2817	29.8179	1	1
65W31	SAT65	EL	2011-12-16	-31.3093	29.989	55	6011	42.5294	-108.852	1	1
65W31	SAT65	EL	2011-12-16	-31.3094	29.9907	55	6006	42.9838	145.432	1	1
65W31	SAT65	EL	2011-12-16	-31.3089	29.9908	55	6003	47.3298	-177.36	1	1
65W31	SAT65	EL	2011-12-16	-31.3092	29.9909	55	6001	52.3817	-29.2627	1	1
65W31	SAT65	EL	2011-12-16	-31.3091	29.9906	55	6007	61.8117	-97.3213	1	1
65W31	SAT65	EL	2011-12-16	-31.3096	29.9907	55	6002	79.3822	172.762	1	1
65W31	SAT65	EL	2011-12-16	-31.3112	29.9886	55	6013	85.4756	48.6802	1	1
65W31	SAT65	EL	2011-12-16	-31.3127	29.983	84	6016	120.22	-15.2199	1	1
65W31	SAT65	EL	2011-12-16	-31.3081	29.9886	84	6009	123.534	-158.972	1	1
65W31	SAT65	EL	2011-12-16	-31.3135	29.9821	84	6018	148.397	124.012	1	1
65W31	SAT65	EL	2011-12-16	-31.3093	29.99	55	6008	206.803	63.2265	1	1
65W31	SAT65	EL	2011-12-16	-31.3118	29.9851	84	6015	236.855	-17.6412	1	1
65W31	SAT65	EL	2011-12-16	-31.3092	29.9895	55	6012	250.608	122.994	1	1
65W31	SAT65	EL	2011-12-16	-31.3115	29.9879	55	6014	294.447	13.0669	1	1
72W28	AU072	EL	2008-12-07	29.9613	-31.2544	6	2819	14.1566	101.158	1	1
72W28	AU072	EL	2008-12-07	29.9569	-31.248	55	2807	14.9898	149.815	1	1
72W28	AU072	EL	2008-12-07	29.9614	-31.2543	6	2818	17.1524	13.4251	1	1
72W28	AU072	EL	2008-12-07	29.957	-31.2479	55	2806	17.3241	148.215	1	1
72W28	AU072	EL	2008-12-07	29.9567	-31.2479	55	2802	39.0358	-170.445	1	1
72W28	AU072	EL	2008-12-07	29.9649	-31.2498	6	2814	45.3819	-104.025	1	1
72W28	AU072	EL	2008-12-07	29.9646	-31.2506	6	2816	49.2835	-45.7571	1	1
72W28	AU072	EL	2008-12-07	29.9561	-31.2494	55	2810	55.5893	-47.6598	1	1
72W28	AU072	EL	2008-12-07	29.9565	-31.2481	55	2803	70.765	-174.699	1	1
72W28	AU072	EL	2008-12-07	29.957	-31.2477	55	2804	70.949	-130.628	1	1
72W28	AU072	EL	2008-12-07	29.957	-31.2479	55	2808	76.1862	169.756	1	1
72W28	AU072	EL	2008-12-07	29.9563	-31.2477	55	2805	81.8589	-164.139	1	1
72W28	AU072	EL	2008-12-07	29.9563	-31.2498	55	2811	102.762	19.3552	1	1
72W28	AU072	EL	2008-12-07	29.9562	-31.2486	55	2801	103.749	31.1129	1	1
72W28	AU072	EL	2008-12-07	29.9646	-31.2496	6	2815	128.351	-139.247	1	1
72W28	AU072	EL	2008-12-07	29.9565	-31.2484	55	2809	129.512	-18.5627	1	1
72W28	AU072	EL	2008-12-07	29.962	-31.2512	55	2813	342.934	-36.4613	1	1
72W28	AU072	EL	2008-12-07	29.9562	-31.2518	55	2800	381.23	-999	1	1
72W28	AU072	EL	2008-12-07	29.965	-31.2509	6	2817	550.952	90.0706	1	1
72W28	AU072	EL	2008-12-07	29.9564	-31.2506	55	2812	577.66	-74.9176	1	1
73W19	AU073	EL	2008-12-18	30.0083	-31.2905	84	3416	2.73254	-128.572	1	1
73W19	AU073	EL	2008-12-18	30.0083	-31.2905	84	3417	2.73254	180	1	1
73W19	AU073	EL	2008-12-18	30.0083	-31.2905	84	3415	4.38272	-136.234	1	1
73W19	AU073	EL	2008-12-18	30.0091	-31.2929	84	3406	6.60832	68.6673	1	1
73W19	AU073	EL	2008-12-18	30.004	-31.2985	55	3402	13.4955	-78.9042	1	1
73W19	AU073	EL	2008-12-18	30.0043	-31.2984	55	3401	33.5076	-169.24	1	1
73W19	AU073	EL	2008-12-18	30.0095	-31.2931	84	3405	36.3297	-101.042	1	1
73W19	AU073	EL	2008-12-18	30.0084	-31.291	84	3414	62.6692	-34.661	1	1
73W19	AU073	EL	2008-12-18	30.0089	-31.2894	84	3419	82.8561	-2.54395	1	1
73W19	AU073	EL	2008-12-18	30.0035	-31.2988	84	3400	94.8048	-999	1	1
73W19	AU073	EL	2008-12-18	30.006	-31.2929	84	3412	106.685	27.8298	1	1
73W19	AU073	EL	2008-12-18	30.0083	-31.2905	84	3418	150.892	116.652	1	1
73W19	AU073	EL	2008-12-18	30.0045	-31.2931	84	3411	151.926	21.267	1	1
73W19	AU073	EL	2008-12-18	30.0091	-31.2929	84	3407	240.704	25.7217	1	1
73W19	AU073	EL	2008-12-18	30.0069	-31.2931	84	3413	298.262	-78.4368	1	1
73W19	AU073	EL	2008-12-18	30.0034	-31.2927	84	3409	359.987	-31.4226	1	1
73W19	AU073	EL	2008-12-18	30.004	-31.2986	55	3403	379.128	-117.565	1	1
73W19	AU073	EL	2008-12-18	30.001	-31.2949	84	3410	419.164	-164.233	1	1
73W19	AU073	EL	2008-12-18	30.0069	-31.2966	55	3404	505.984	-18.3795	1	1
73W19	AU073	EL	2008-12-18	30.0102	-31.2911	84	3408	723.647	-131.262	1	1
73W21	AU073	EL	2009-01-01	29.9973	-31.2979	84	4009	3.18153	-180	1	1
73W21	AU073	EL	2009-01-01	29.9973	-31.2978	84	4008	6.36305	23.9081	1	1
73W21	AU073	EL	2009-01-01	29.9936	-31.2947	55	4003	7.2332	104.51	1	1
73W21	AU073	EL	2009-01-01	30.0057	-31.2974	55	4019	15.7775	-10.8255	1	1
73W21	AU073	EL	2009-01-01	29.9936	-31.2947	55	4004	25.6514	-50.2615	1	1
73W21	AU073	EL	2009-01-01	29.9932	-31.2946	55	4002	40.0596	-41.3264	1	1
73W21	AU073	EL	2009-01-01	29.998	-31.2976	84	4011	41.6621	40.4802	1	1
73W21	AU073	EL	2009-01-01	29.9973	-31.2978	84	4010	79.0995	68.0136	1	1
73W21	AU073	EL	2009-01-01	29.9927	-31.2941	3	4001	80.5052	33.5915	1	1
73W21	AU073	EL	2009-01-01	30.0034	-31.2998	55	4016	80.5805	-82.8582	1	1
73W21	AU073	EL	2009-01-01	29.9937	-31.2949	55	4005	96.5413	-20.7489	1	1
73W21	AU073	EL	2009-01-01	30.0035	-31.2992	55	4017	118.135	40.1325	1	1
73W21	AU073	EL	2009-01-01	30.0044	-31.2985	55	4018	186.912	-8.2454	1	1
73W21	AU073	EL	2009-01-01	29.9968	-31.2992	84	4013	216.235	-76.4456	1	1
73W21	AU073	EL	2009-01-01	29.9964	-31.2961	84	4007	222.993	45.6718	1	1
73W21	AU073	EL	2009-01-01	29.9944	-31.2955	84	4006	225.83	-22.5686	1	1
73W21	AU073	EL	2009-01-01	29.9984	-31.2977	84	4012	243.429	114.713	1	1
73W21	AU073	EL	2009-01-01	29.9903	-31.2934	84	4000	266.027	-999	1	1
73W21	AU073	EL	2009-01-01	30.0008	-31.2996	84	4015	269.153	28.5004	1	1
73W21	AU073	EL	2009-01-01	29.9979	-31.3007	84	4014	320.379	-80.3554	1	1
73W42	AU073	EL	2009-03-31	30.0227	-31.2776	55	8212	3.42691	-180	1	1
73W42	AU073	EL	2009-03-31	30.0227	-31.2776	55	8211	6.60904	180	1	1
73W42	AU073	EL	2009-03-30	30.0222	-31.278	55	8205	6.63077	-78.8723	1	1
73W42	AU073	EL	2009-03-31	30.0227	-31.2777	55	8209	8.71237	7.8168	1	1
73W42	AU073	EL	2009-03-31	30.0227	-31.2776	55	8210	9.79117	-40.6597	1	1
73W42	AU073	EL	2009-03-30	30.0227	-31.2775	55	8202	11.7909	-152.204	1	1
73W42	AU073	EL	2009-03-31	30.0227	-31.2776	55	8213	22.7437	150.663	1	1
73W42	AU073	EL	2009-03-31	30.0112	-31.2786	3	8217	23.6472	57.7941	1	1
73W42	AU073	EL	2009-03-31	30.0222	-31.2779	55	8206	34.8731	-139.752	1	1
73W42	AU073	EL	2009-03-31	30.0111	-31.279	3	8216	51.174	104.426	1	1
73W42	AU073	EL	2009-03-30	30.022	-31.2785	55	8204	66.4206	163.62	1	1
73W42	AU073	EL	2009-03-31	30.0223	-31.2782	55	8207	68.0136	48.4816	1	1
73W42	AU073	EL	2009-03-30	30.023	-31.2768	55	8200	134.899	-999	1	1
73W42	AU073	EL	2009-03-31	30.0219	-31.2787	55	8208	140.722	-177.004	1	1
73W42	AU073	EL	2009-03-30	30.0228	-31.2775	55	8203	142.881	142.029	1	1
73W42	AU073	EL	2009-03-31	30.0075	-31.2794	3	8219	161.475	-53.1843	1	1
73W42	AU073	EL	2009-03-30	30.0242	-31.2763	55	8201	209.984	162.479	1	1
73W42	AU073	EL	2009-03-31	30.0114	-31.2786	3	8218	420.241	-176.868	1	1
73W42	AU073	EL	2009-03-31	30.0158	-31.2792	3	8215	488.547	14.5593	1	1
73W42	AU073	EL	2009-03-31	30.0228	-31.2778	55	8214	744.666	106.322	1	1
73W5	AU073	EL	2008-10-25	29.9728	-31.2274	6	808	4.19482	176.957	1	1
73W5	AU073	EL	2008-10-25	29.9687	-31.2235	6	802	6.92539	113.254	1	1
73W5	AU073	EL	2008-10-25	29.9638	-31.2251	6	817	19.77	156.507	1	1
73W5	AU073	EL	2008-10-25	29.9635	-31.2248	6	816	52.9409	-83.2738	1	1
73W5	AU073	EL	2008-10-25	29.9636	-31.225	6	818	68.8308	124.248	1	1
73W5	AU073	EL	2008-10-25	29.9696	-31.2235	6	801	84.5487	43.9546	1	1
73W5	AU073	EL	2008-10-25	29.9735	-31.2281	6	807	120.208	1.84839	1	1
73W5	AU073	EL	2008-10-25	29.968	-31.2228	4	811	138.102	-158.44	1	1
73W5	AU073	EL	2008-10-25	29.9683	-31.2243	6	810	189.352	43.3995	1	1
73W5	AU073	EL	2008-10-25	29.971	-31.2223	4	800	208.023	-999	1	1
73W5	AU073	EL	2008-10-25	29.9754	-31.2301	81	806	306.613	149.006	1	1
73W5	AU073	EL	2008-10-25	29.9642	-31.2248	6	819	324.388	-118.004	1	1
73W5	AU073	EL	2008-10-25	29.9688	-31.2234	6	803	463.736	34.609	1	1
73W5	AU073	EL	2008-10-25	29.9726	-31.2214	6	804	470.358	96.5198	1	1
73W5	AU073	EL	2008-10-25	29.9742	-31.2251	6	813	496.1	-102.797	1	1
73W5	AU073	EL	2008-10-25	29.9742	-31.221	6	814	521.667	-79.5428	1	1
73W5	AU073	EL	2008-10-25	29.9729	-31.2274	6	809	598.167	168.648	1	1
73W5	AU073	EL	2008-10-25	29.9745	-31.2249	6	805	631.217	17.1349	1	1
73W5	AU073	EL	2008-10-25	29.9677	-31.2239	6	812	687.564	-90.7919	1	1
73W5	AU073	EL	2008-10-25	29.9692	-31.2202	4	815	803.797	-52.5437	1	1
73W52	AU073	EL	2009-05-12	30.0336	-31.2533	55	10200	0	-999	1	1
73W52	AU073	EL	2009-05-12	30.032	-31.2567	7	10217	3.42723	48.8805	1	1
73W52	AU073	EL	2009-05-12	30.0336	-31.2533	55	10202	3.42728	40.668	1	1
73W52	AU073	EL	2009-05-12	30.0336	-31.2533	55	10201	4.19569	-999	1	1
73W52	AU073	EL	2009-05-12	30.0334	-31.2547	55	10206	4.38424	81.617	1	1
73W52	AU073	EL	2009-05-12	30.0333	-31.2546	55	10207	5.67867	-51.4188	1	1
73W52	AU073	EL	2009-05-12	30.0311	-31.256	7	10214	13.5432	107.643	1	1
73W52	AU073	EL	2009-05-12	30.0312	-31.2559	55	10213	19.4674	-41.5069	1	1
73W52	AU073	EL	2009-05-12	30.0336	-31.2546	55	10205	26.2816	59.8009	1	1
73W52	AU073	EL	2009-05-12	30.0311	-31.2559	55	10215	42.7616	160.472	1	1
73W52	AU073	EL	2009-05-12	30.0336	-31.2533	55	10203	42.841	-180	1	1
73W52	AU073	EL	2009-05-12	30.0342	-31.256	7	10210	45.9021	0.466846	1	1
73W52	AU073	EL	2009-05-12	30.032	-31.2568	7	10218	59.6491	83.8734	1	1
73W52	AU073	EL	2009-05-12	30.032	-31.256	7	10212	83.6466	2.53769	1	1
73W52	AU073	EL	2009-05-12	30.0313	-31.2562	7	10216	104.971	-16.7945	1	1
73W52	AU073	EL	2009-05-12	30.0336	-31.2536	55	10204	115.059	0.000267374	1	1
73W52	AU073	EL	2009-05-12	30.0315	-31.2568	7	10219	142.736	30.5389	1	1
73W52	AU073	EL	2009-05-12	30.035	-31.255	7	10209	148.864	114.278	1	1
73W52	AU073	EL	2009-05-12	30.0333	-31.2546	55	10208	188.542	-166.866	1	1
73W52	AU073	EL	2009-05-12	30.0339	-31.2563	7	10211	194.29	60.8904	1	1
73W58	AU073	EL	2009-06-07	30.022	-31.262	7	11419	4.33513	132.178	1	1
73W58	AU073	EL	2009-06-06	30.0272	-31.2575	7	11403	4.33548	-30.7101	1	1
73W58	AU073	EL	2009-06-06	30.0201	-31.263	7	11415	4.38375	107.532	1	1
73W58	AU073	EL	2009-06-06	30.0199	-31.2618	7	11410	6.5086	119.268	1	1
73W58	AU073	EL	2009-06-06	30.0199	-31.2617	7	11409	6.60911	-64.8682	1	1
73W58	AU073	EL	2009-06-06	30.02	-31.2617	7	11408	15.5624	13.4777	1	1
73W58	AU073	EL	2009-06-06	30.02	-31.2626	7	11412	17.3552	-8.10971	1	1
73W58	AU073	EL	2009-06-06	30.0204	-31.2631	7	11414	27.2629	142.526	1	1
73W58	AU073	EL	2009-06-06	30.0201	-31.2627	7	11413	53.9601	-12.3842	1	1
73W58	AU073	EL	2009-06-06	30.0338	-31.2529	55	11400	62.4256	-999	1	1
73W58	AU073	EL	2009-06-06	30.0266	-31.2581	7	11405	80.9566	-12.4268	1	1
73W58	AU073	EL	2009-06-06	30.0271	-31.2575	7	11404	93.6358	-3.47543	1	1
73W58	AU073	EL	2009-06-06	30.022	-31.2612	7	11418	95.5924	173.212	1	1
73W58	AU073	EL	2009-06-06	30.0199	-31.2617	7	11411	103.73	-130.254	1	1
73W58	AU073	EL	2009-06-06	30.0218	-31.2622	7	11417	124.051	-47.9621	1	1
73W58	AU073	EL	2009-06-06	30.0202	-31.263	7	11416	196.109	21.22	1	1
73W58	AU073	EL	2009-06-06	30.0262	-31.2587	7	11406	295.746	-179.617	1	1
73W58	AU073	EL	2009-06-06	30.0338	-31.2534	55	11401	402.033	30.8425	1	1
73W58	AU073	EL	2009-06-06	30.0318	-31.2563	7	11402	497.732	42.6398	1	1
73W58	AU073	EL	2009-06-06	30.0275	-31.2565	7	11407	990.121	-155.867	1	1
71W14	AU071	EL	2008/11/7	29.9793	-31.2566	6	768	3.1814	-174.563	1	1
71W14	AU071	EL	2008/11/7	29.9793	-31.2566	6	769	6.32474	120.198	1	1
71W14	AU071	EL	2008/11/7	29.9794	-31.2566	6	770	2.73321	149.801	1	1
71W14	AU071	EL	2008/11/7	29.9793	-31.2566	6	771	2.7332	-1.62024e-05	1	1
71W14	AU071	EL	2008/11/7	29.9793	-31.2566	6	772	235.385	128.571	1	1
71W14	AU071	EL	2008/11/7	29.9807	-31.2551	6	773	170.403	-0.745887	1	1
71W14	AU071	EL	2008/11/7	29.9817	-31.254	6	774	4.19435	101.509	1	1
71W14	AU071	EL	2008/11/7	29.9818	-31.254	6	775	52.2424	-79.4153	1	1
71W14	AU071	EL	2008/11/7	29.9822	-31.2538	82	776	15.6647	152.556	1	1
71W14	AU071	EL	2008/11/7	29.9821	-31.2539	82	777	81.4812	161.565	1	1
71W14	AU071	EL	2008/11/7	29.9823	-31.2533	55	778	117.643	92.2716	1	1
71W14	AU071	EL	2008/11/7	29.9834	-31.2535	82	779	428.894	-75.4253	1	1
71W14	AU071	EL	2008/11/7	29.9855	-31.2505	82	780	5.67731	-120.884	1	1
71W14	AU071	EL	2008/11/8	29.9855	-31.2505	82	781	4.38307	51.4175	1	1
71W14	AU071	EL	2008/11/8	29.9855	-31.2504	85	782	14.3835	-164.664	1	1
71W14	AU071	EL	2008/11/8	29.9855	-31.2505	82	783	0	-999	1	1
71W14	AU071	EL	2008/11/8	29.9855	-31.2505	82	784	6.60785	-999	1	1
71W14	AU071	EL	2008/11/8	29.9855	-31.2505	82	785	147.321	40.6061	1	1
71W14	AU071	EL	2008/11/8	29.9864	-31.2496	82	786	7.23394	115.381	1	1
71W14	AU071	EL	2008/11/8	29.9865	-31.2496	82	787	386.817	-170.372	1	1
71W14	AU071	EL	2008/11/8	29.9855	-31.2465	85	788	1065.15	43.9337	1	1
65W72	SAT65	EL	2012-01-28	-31.278	30.021	55	8080	15.6815	-39.5536	1	1
65W72	SAT65	EL	2012-01-28	-31.2781	30.0209	55	8081	70.7902	-34.9511	1	1
65W72	SAT65	EL	2012-01-28	-31.2786	30.0207	55	8082	11.2436	-168.136	1	1
65W72	SAT65	EL	2012-01-28	-31.2786	30.0208	55	8083	12.0312	152.642	1	1
65W72	SAT65	EL	2012-01-28	-31.2787	30.0208	55	8084	9.47358	-33.0521	1	1
65W72	SAT65	EL	2012-01-28	-31.2787	30.0208	55	8085	3.916	-86.3928	1	1
65W72	SAT65	EL	2012-01-29	-31.2787	30.0208	55	8086	31.6231	7.08203	1	1
65W72	SAT65	EL	2012-01-29	-31.2786	30.0211	55	8087	112.802	92.7173	1	1
65W72	SAT65	EL	2012-01-29	-31.2795	30.0215	55	8088	75.6755	-134.703	1	1
65W72	SAT65	EL	2012-01-29	-31.2789	30.0218	55	8089	63.0593	-8.19917	1	1
65W72	SAT65	EL	2012-01-29	-31.2784	30.022	55	8090	5.55709	-129.048	1	1
65W72	SAT65	EL	2012-01-29	-31.2784	30.022	55	8091	6.51628	164.057	1	1
65W72	SAT65	EL	2012-01-29	-31.2784	30.022	55	8092	16.4788	-40.517	1	1
65W72	SAT65	EL	2012-01-29	-31.2783	30.022	55	8093	24.244	-46.4785	1	1
65W72	SAT65	EL	2012-01-29	-31.2781	30.0219	55	8094	46.3202	93.2362	1	1
65W72	SAT65	EL	2012-01-29	-31.2779	30.0223	55	8095	15.6791	-108.568	1	1
65W72	SAT65	EL	2012-01-29	-31.2778	30.0222	55	8096	268.902	-54.8304	1	1
65W72	SAT65	EL	2012-01-29	-31.2784	30.0196	55	8097	488.32	137.356	1	1
65W72	SAT65	EL	2012-01-29	-31.275	30.0222	17	8098	85.1414	12.3843	1	1
65W72	SAT65	EL	2012-01-29	-31.2745	30.0228	17	8099	134.659	1.76676	1	1
65W72	SAT65	EL	2012-01-29	-31.2737	30.0237	17	8100	274.895	-27.0332	1	1
64W1	SAT64EL	EL	2011-08-11	-31.3	29.9696	84	12	1.65246	32.7962	2	1
64W1	SAT64EL	EL	2011-08-11	-31.3026	29.973	84	2	1.75571	-13.4157	2	1
64W1	SAT64EL	EL	2011-08-11	-31.3071	29.9905	84	19	1.7558	56.6278	2	1
64W1	SAT64EL	EL	2011-08-11	-31.3026	29.973	84	3	8.05824	-89.999	2	1
64W1	SAT64EL	EL	2011-08-11	-31.3026	29.9729	84	1	8.81245	-999	2	1
64W1	SAT64EL	EL	2011-08-11	-31.2998	29.9697	84	7	14.1807	146.215	2	1
64W1	SAT64EL	EL	2011-08-11	-31.2999	29.9698	84	11	18.4296	13.4906	2	1
64W1	SAT64EL	EL	2011-08-11	-31.2999	29.9697	84	8	19.9319	114.671	2	1
64W1	SAT64EL	EL	2011-08-11	-31.2997	29.97	84	10	24.959	154.221	2	1
64W1	SAT64EL	EL	2011-08-11	-31.3	29.9695	84	6	26.9188	83.1958	2	1
64W1	SAT64EL	EL	2011-08-11	-31.2999	29.9695	84	9	51.495	141.932	2	1
64W1	SAT64EL	EL	2011-08-11	-31.3025	29.973	84	4	62.1808	-0.000118643	2	1
64W1	SAT64EL	EL	2011-08-11	-31.3058	29.9911	84	17	67.2329	66.3004	2	1
64W1	SAT64EL	EL	2011-08-11	-31.3064	29.991	84	18	103.272	23.1062	2	1
64W1	SAT64EL	EL	2011-08-11	-31.3042	29.9884	84	16	344.46	2.10738	2	1
64W1	SAT64EL	EL	2011-08-11	-31.302	29.973	84	5	425.186	-56.5263	2	1
64W1	SAT64EL	EL	2011-08-11	-31.302	29.9842	84	15	508.807	-2.14054	2	1
64W1	SAT64EL	EL	2011-08-11	-31.2983	29.9779	84	14	784.942	46.968	2	1
64W1	SAT64EL	EL	2011-08-11	-31.3	29.9696	84	13	876.035	167.046	2	1
64W10	SAT64EL	EL	2011-09-17	-31.2933	30.0096	84	1806	1.75631	81.3714	2	1
64W10	SAT64EL	EL	2011-09-17	-31.2933	30.0097	84	1807	1.75631	-180	2	1
64W10	SAT64EL	EL	2011-09-17	-31.2933	30.0096	84	1808	2.69574	-130.655	2	1
64W10	SAT64EL	EL	2011-09-18	-31.2943	30.0039	84	1817	3.97552	45.8362	2	1
64W10	SAT64EL	EL	2011-09-17	-31.293	30.0092	84	1811	5.16563	-49.3451	2	1
64W10	SAT64EL	EL	2011-09-17	-31.2929	30.0091	84	1810	7.92863	-171.805	2	1
64W10	SAT64EL	EL	2011-09-17	-31.2944	30.0039	84	1816	22.6122	165.48	2	1
64W10	SAT64EL	EL	2011-09-17	-31.2936	30.0096	84	1805	34.4349	144.956	2	1
64W10	SAT64EL	EL	2011-09-18	-31.2942	30.004	84	1818	67.1501	30.9582	2	1
64W10	SAT64EL	EL	2011-09-17	-31.2933	30.0097	84	1809	73.1279	171.804	2	1
64W10	SAT64EL	EL	2011-09-17	-31.293	30.0102	55	1804	99.7936	73.4641	2	1
64W10	SAT64EL	EL	2011-09-18	-31.2942	30.0046	84	1819	105.986	68.0208	2	1
64W10	SAT64EL	EL	2011-09-17	-31.293	30.0092	84	1812	120.49	-166.489	2	1
64W10	SAT64EL	EL	2011-09-17	-31.2921	30.0097	84	1803	124.76	23.4621	2	1
64W10	SAT64EL	EL	2011-09-17	-31.2933	30.0046	84	1815	151.665	-49.3063	2	1
64W10	SAT64EL	EL	2011-09-17	-31.293	30.0061	84	1814	160.823	-3.50088	2	1
64W10	SAT64EL	EL	2011-09-17	-31.2911	30.0081	84	1802	197.657	-174.037	2	1
64W10	SAT64EL	EL	2011-09-17	-31.2927	30.0081	84	1813	207.696	-22.9798	2	1
64W10	SAT64EL	EL	2011-09-17	-31.2922	30.0103	84	1801	258.554	-92.0554	2	1
64W10	SAT64EL	EL	2011-09-17	-31.2953	30.008	84	1800	441.429	-999	2	1
64W12	SAT64EL	EL	2011-09-26	-31.2806	30.0134	3	2207	2.69606	-28.9064	2	1
64W12	SAT64EL	EL	2011-09-26	-31.282	30.0032	3	2218	3.97597	-175.529	2	1
64W12	SAT64EL	EL	2011-09-26	-31.2806	30.0134	3	2206	5.51352	-164.155	2	1
64W12	SAT64EL	EL	2011-09-26	-31.2751	30.0113	34	2211	5.55687	-84.0937	2	1
64W12	SAT64EL	EL	2011-09-26	-31.2805	30.0135	3	2204	7.18585	58.1456	2	1
64W12	SAT64EL	EL	2011-09-26	-31.2805	30.0136	3	2205	23.5852	159.259	2	1
64W12	SAT64EL	EL	2011-09-26	-31.2812	30.014	3	2201	34.6238	117.312	2	1
64W12	SAT64EL	EL	2011-09-26	-31.2818	30.0036	3	2217	48.564	77.1046	2	1
64W12	SAT64EL	EL	2011-09-26	-31.2827	30.0026	3	2214	96.2996	76.2548	2	1
64W12	SAT64EL	EL	2011-09-26	-31.2795	30.0103	27	2209	127.939	-76.2433	2	1
64W12	SAT64EL	EL	2011-09-26	-31.2808	30.0031	3	2216	130.239	122.8	2	1
64W12	SAT64EL	EL	2011-09-26	-31.281	30.0138	3	2202	151.233	-115.565	2	1
64W12	SAT64EL	EL	2011-09-26	-31.2821	30.002	3	2215	187.812	76.1215	2	1
64W12	SAT64EL	EL	2011-09-26	-31.282	30.013	3	2203	190.163	161.577	2	1
64W12	SAT64EL	EL	2011-09-26	-31.282	30.0032	3	2219	308.944	-118.195	2	1
64W12	SAT64EL	EL	2011-09-26	-31.2806	30.0134	3	2208	348.254	-109.032	2	1
64W12	SAT64EL	EL	2011-09-26	-31.2783	30.0161	3	2200	411.237	-999	2	1
64W12	SAT64EL	EL	2011-09-26	-31.275	30.0113	34	2212	477.641	-105.808	2	1
64W12	SAT64EL	EL	2011-09-26	-31.2803	30.0096	27	2210	662.289	160.301	2	1
64W12	SAT64EL	EL	2011-09-26	-31.279	30.0108	27	2213	953.176	56.504	2	1
64W13	SAT64EL	EL	2011-09-30	-31.3016	29.9687	36	2411	2.04458	-176.269	2	1
64W13	SAT64EL	EL	2011-09-30	-31.3016	29.9687	36	2412	5.16379	89.999	2	1
64W13	SAT64EL	EL	2011-09-30	-31.3002	29.9687	36	2408	16.8086	127.96	2	1
64W13	SAT64EL	EL	2011-09-30	-31.3004	29.9688	36	2409	22.941	133.684	2	1
64W13	SAT64EL	EL	2011-09-30	-31.3001	29.9729	36	2419	66.2826	-24.7285	2	1
64W13	SAT64EL	EL	2011-09-30	-31.3085	29.9754	36	2403	67.1928	-23.1657	2	1
64W13	SAT64EL	EL	2011-09-30	-31.2996	29.9725	36	2418	70.2799	83.1942	2	1
64W13	SAT64EL	EL	2011-09-30	-31.3092	29.9757	36	2402	86.65	-111.024	2	1
64W13	SAT64EL	EL	2011-09-30	-31.3009	29.9682	36	2407	91.992	68.9524	2	1
64W13	SAT64EL	EL	2011-09-30	-31.3001	29.9714	36	2417	126.039	75.6685	2	1
64W13	SAT64EL	EL	2011-09-30	-31.3091	29.9744	36	2401	139.544	-73.0826	2	1
64W13	SAT64EL	EL	2011-09-30	-31.3003	29.9686	36	2410	158.731	-119.523	2	1
64W13	SAT64EL	EL	2011-09-30	-31.3073	29.9738	36	2400	227.657	-999	2	1
64W13	SAT64EL	EL	2011-09-30	-31.3015	29.9715	36	2414	248.523	6.56061	2	1
64W13	SAT64EL	EL	2011-09-30	-31.3016	29.9739	36	2415	270.234	122.601	2	1
64W13	SAT64EL	EL	2011-09-30	-31.3081	29.975	36	2404	275.461	-17.1826	2	1
64W13	SAT64EL	EL	2011-09-30	-31.3016	29.9687	36	2413	287.671	-2.39529	2	1
64W13	SAT64EL	EL	2011-09-30	-31.303	29.9699	36	2406	307.591	-3.07642	2	1
64W13	SAT64EL	EL	2011-09-30	-31.3035	29.9723	36	2416	409.624	130.122	2	1
64W13	SAT64EL	EL	2011-09-30	-31.3069	29.9727	36	2405	556.291	27.1679	2	1
64W14	SAT64EL	EL	2011-10-04	-31.2985	29.9654	36	2608	2.60491	117.813	2	1
64W14	SAT64EL	EL	2011-10-04	-31.3036	29.97	36	2619	10.3274	146.103	2	1
64W14	SAT64EL	EL	2011-10-04	-31.2985	29.9655	36	2609	30.0836	-108.814	2	1
64W14	SAT64EL	EL	2011-10-04	-31.3013	29.9653	36	2617	48.1388	156.665	2	1
64W14	SAT64EL	EL	2011-10-04	-31.2975	29.9618	36	2601	53.0699	-115.91	2	1
64W14	SAT64EL	EL	2011-10-04	-31.2987	29.968	36	2606	64.7207	-33.6149	2	1
64W14	SAT64EL	EL	2011-10-04	-31.2961	29.9709	36	2614	75.1667	-115.75	2	1
64W14	SAT64EL	EL	2011-10-04	-31.2997	29.969	36	2604	118.796	-98.6541	2	1
64W14	SAT64EL	EL	2011-10-04	-31.2987	29.9691	36	2605	120.592	-93.103	2	1
64W14	SAT64EL	EL	2011-10-04	-31.2974	29.9606	36	2600	125.704	-999	2	1
64W14	SAT64EL	EL	2011-10-04	-31.2984	29.9652	36	2610	130.759	113.973	2	1
64W14	SAT64EL	EL	2011-10-04	-31.2989	29.9696	36	2612	142.037	-50.1868	2	1
64W14	SAT64EL	EL	2011-10-04	-31.299	29.9674	36	2607	215.227	46.2915	2	1
64W14	SAT64EL	EL	2011-10-04	-31.2983	29.9708	36	2613	272.852	-60.0732	2	1
64W14	SAT64EL	EL	2011-10-04	-31.2991	29.9658	36	2603	340.084	-14.9803	2	1
64W14	SAT64EL	EL	2011-10-04	-31.2963	29.9702	36	2615	378.582	-2.82968	2	1
64W14	SAT64EL	EL	2011-10-04	-31.2977	29.9661	36	2611	383.58	64.8957	2	1
64W14	SAT64EL	EL	2011-10-04	-31.2977	29.9669	36	2616	456.021	-42.3464	2	1
64W14	SAT64EL	EL	2011-10-04	-31.297	29.9616	36	2602	502.051	143.607	2	1
64W14	SAT64EL	EL	2011-10-04	-31.3009	29.9653	36	2618	578.562	125.99	2	1
64W16	SAT64EL	EL	2011-10-13	-31.2959	29.9615	36	3017	2.04451	-77.8773	2	1
64W16	SAT64EL	EL	2011-10-13	-31.2958	29.962	36	3015	2.60485	-31.981	2	1
64W16	SAT64EL	EL	2011-10-12	-31.2955	29.9608	36	3002	5.29923	18.5746	2	1
64W16	SAT64EL	EL	2011-10-12	-31.2955	29.9608	36	3003	5.32318	-1.69056	2	1
64W16	SAT64EL	EL	2011-10-13	-31.2958	29.962	36	3019	6.01328	101.427	2	1
64W16	SAT64EL	EL	2011-10-12	-31.2943	29.9596	36	3006	7.18225	12.8187	2	1
64W16	SAT64EL	EL	2011-10-12	-31.2943	29.9595	36	3007	8.63827	-82.3013	2	1
64W16	SAT64EL	EL	2011-10-12	-31.2954	29.9609	36	3001	8.74894	141.65	2	1
64W16	SAT64EL	EL	2011-10-12	-31.2944	29.9595	36	3008	10.6212	17.4168	2	1
64W16	SAT64EL	EL	2011-10-13	-31.2961	29.962	36	3014	28.6119	-90.723	2	1
64W16	SAT64EL	EL	2011-10-13	-31.2958	29.9619	36	3016	47.5355	-59.7442	2	1
64W16	SAT64EL	EL	2011-10-13	-31.2959	29.9615	36	3018	50.9977	-101.426	2	1
64W16	SAT64EL	EL	2011-10-13	-31.2962	29.9614	36	3013	59.4038	-138.108	2	1
64W16	SAT64EL	EL	2011-10-12	-31.2944	29.9604	36	3005	86.129	-72.5647	2	1
64W16	SAT64EL	EL	2011-10-12	-31.2958	29.96	36	3000	100.104	-999	2	1
64W16	SAT64EL	EL	2011-10-12	-31.2956	29.9608	36	3004	149.211	125.473	2	1
64W16	SAT64EL	EL	2011-10-13	-31.2948	29.9627	36	3012	202.204	9.86303	2	1
64W16	SAT64EL	EL	2011-10-12	-31.2923	29.962	36	3010	250.343	39.9291	2	1
64W16	SAT64EL	EL	2011-10-12	-31.2921	29.9644	36	3011	374.268	123.174	2	1
64W16	SAT64EL	EL	2011-10-12	-31.2945	29.9594	36	3009	374.371	-175.185	2	1
64W17	SAT64EL	EL	2011-10-17	-31.2308	29.9642	31	3211	1.75719	-71.1371	2	1
64W17	SAT64EL	EL	2011-10-17	-31.2301	29.9635	31	3205	2.04477	76.0298	2	1
64W17	SAT64EL	EL	2011-10-17	-31.2301	29.9636	31	3207	3.96926	90.001	2	1
64W17	SAT64EL	EL	2011-10-17	-31.2301	29.9635	31	3206	6.92542	-90.001	2	1
64W17	SAT64EL	EL	2011-10-17	-31.2309	29.9642	31	3210	10.5499	-50.2313	2	1
64W17	SAT64EL	EL	2011-10-17	-31.231	29.9642	31	3209	16.4819	-116.906	2	1
64W17	SAT64EL	EL	2011-10-17	-31.2292	29.9596	31	3203	16.6301	-29.9845	2	1
64W17	SAT64EL	EL	2011-10-16	-31.2292	29.9638	31	3200	27.6743	-999	2	1
64W17	SAT64EL	EL	2011-10-17	-31.2293	29.9596	31	3217	33.0631	35.0447	2	1
64W17	SAT64EL	EL	2011-10-16	-31.2292	29.9636	31	3201	99.2185	-35.9001	2	1
64W17	SAT64EL	EL	2011-10-17	-31.2301	29.9636	31	3208	117.936	-31.7261	2	1
64W17	SAT64EL	EL	2011-10-17	-31.2308	29.9642	31	3212	162.96	-85.1595	2	1
64W17	SAT64EL	EL	2011-10-17	-31.2286	29.9579	31	3215	213.778	56.4689	2	1
64W17	SAT64EL	EL	2011-10-17	-31.2328	29.9587	31	3219	246.783	165.351	2	1
64W17	SAT64EL	EL	2011-10-17	-31.2272	29.9592	31	3216	264.936	132.341	2	1
64W17	SAT64EL	EL	2011-10-16	-31.2296	29.9627	31	3202	327.681	40.4446	2	1
64W17	SAT64EL	EL	2011-10-17	-31.2296	29.9595	31	3218	398.038	-12.3199	2	1
64W17	SAT64EL	EL	2011-10-17	-31.2292	29.9595	31	3204	431.386	-144.826	2	1
64W17	SAT64EL	EL	2011-10-17	-31.2323	29.9594	31	3214	469.439	72.863	2	1
64W17	SAT64EL	EL	2011-10-17	-31.2321	29.9641	31	3213	480.966	83.0088	2	1
64W18	SAT64EL	EL	2011-10-21	-31.2324	29.9735	31	3408	1.9246	-59.0102	2	1
64W18	SAT64EL	EL	2011-10-21	-31.2449	29.9756	31	3400	2.53741	-999	2	1
64W18	SAT64EL	EL	2011-10-21	-31.2332	29.9734	31	3411	4.06605	24.96	2	1
64W18	SAT64EL	EL	2011-10-21	-31.2449	29.9756	31	3401	5.23341	180	2	1
64W18	SAT64EL	EL	2011-10-21	-31.2382	29.9701	31	3417	17.0565	145.794	2	1
64W18	SAT64EL	EL	2011-10-21	-31.2332	29.9736	31	3410	22.4206	104.569	2	1
64W18	SAT64EL	EL	2011-10-21	-31.2381	29.9702	31	3418	24.3179	160	2	1
64W18	SAT64EL	EL	2011-10-21	-31.2448	29.9755	31	3402	53.9724	82.755	2	1
64W18	SAT64EL	EL	2011-10-21	-31.2324	29.9735	31	3409	95.571	-9.33652	2	1
64W18	SAT64EL	EL	2011-10-21	-31.2383	29.9701	31	3419	182.368	169.623	2	1
64W18	SAT64EL	EL	2011-10-21	-31.2316	29.975	31	3407	186.901	-166.8	2	1
64W18	SAT64EL	EL	2011-10-21	-31.2345	29.9688	31	3413	208.531	-8.54648	2	1
64W18	SAT64EL	EL	2011-10-21	-31.2381	29.9703	31	3415	245.009	-51.5429	2	1
64W18	SAT64EL	EL	2011-10-21	-31.2378	29.9726	31	3416	271.649	176.892	2	1
64W18	SAT64EL	EL	2011-10-21	-31.2445	29.9759	31	3403	313.029	-69.9809	2	1
64W18	SAT64EL	EL	2011-10-21	-31.2422	29.9745	31	3404	328.659	0.094414	2	1
64W18	SAT64EL	EL	2011-10-21	-31.2337	29.9725	31	3406	365.16	49.8594	2	1
64W18	SAT64EL	EL	2011-10-21	-31.2353	29.967	31	3414	479.004	-109.137	2	1
64W18	SAT64EL	EL	2011-10-21	-31.2332	29.9734	31	3412	504.412	-48.4983	2	1
64W18	SAT64EL	EL	2011-10-21	-31.2398	29.973	31	3405	731.601	23.7461	2	1
64W19	SAT64EL	EL	2011-10-25	-31.2976	29.9717	36	3610	9.16776	146.363	2	1
64W19	SAT64EL	EL	2011-10-25	-31.2965	29.9707	36	3608	76.6831	114.971	2	1
64W19	SAT64EL	EL	2011-10-25	-31.3047	29.9689	36	3604	77.8597	20.0001	2	1
64W19	SAT64EL	EL	2011-10-25	-31.2968	29.9714	36	3609	104.028	51.5437	2	1
64W19	SAT64EL	EL	2011-10-25	-31.3004	29.9687	36	3612	141.846	37.6065	2	1
64W19	SAT64EL	EL	2011-10-25	-31.2975	29.9627	36	3615	143.412	177.839	2	1
64W19	SAT64EL	EL	2011-10-25	-31.3048	29.9697	36	3605	152.326	-19.5525	2	1
64W19	SAT64EL	EL	2011-10-25	-31.3051	29.9673	36	3603	172.214	114.794	2	1
64W19	SAT64EL	EL	2011-10-25	-31.2991	29.962	36	3614	203.029	90.9019	2	1
64W19	SAT64EL	EL	2011-10-25	-31.3097	29.9746	36	3600	285.588	-999	2	1
64W19	SAT64EL	EL	2011-10-25	-31.3022	29.9577	36	3618	308.712	55.2609	2	1
64W19	SAT64EL	EL	2011-10-25	-31.2996	29.9709	36	3607	367.027	0.449747	2	1
64W19	SAT64EL	EL	2011-10-25	-31.3076	29.9697	36	3602	394.31	55.3213	2	1
64W19	SAT64EL	EL	2011-10-25	-31.2976	29.9716	36	3611	462.315	-89.2018	2	1
64W19	SAT64EL	EL	2011-10-25	-31.3073	29.9744	36	3601	484.96	-89.4158	2	1
64W19	SAT64EL	EL	2011-10-25	-31.2997	29.9576	36	3619	512.772	35.2421	2	1
64W19	SAT64EL	EL	2011-10-25	-31.3046	29.962	36	3617	528.137	120.542	2	1
64W19	SAT64EL	EL	2011-10-25	-31.3007	29.9673	36	3613	578.54	30.0271	2	1
64W19	SAT64EL	EL	2011-10-25	-31.3045	29.9711	36	3606	589.818	-78.6362	2	1
64W19	SAT64EL	EL	2011-10-25	-31.2986	29.9623	36	3616	726.294	-15.5843	2	1
64W20	SAT64EL	EL	2011-10-29	-31.3075	29.956	36	3816	3.40759	-37.8472	2	1
64W20	SAT64EL	EL	2011-10-29	-31.3075	29.956	36	3817	3.51085	-2.05081e-05	2	1
64W20	SAT64EL	EL	2011-10-29	-31.3075	29.9559	36	3818	4.00357	151.275	2	1
64W20	SAT64EL	EL	2011-10-29	-31.3019	29.9598	36	3803	5.16349	77.0875	2	1
64W20	SAT64EL	EL	2011-10-29	-31.3019	29.9599	36	3804	6.81581	180	2	1
64W20	SAT64EL	EL	2011-10-29	-31.3	29.957	36	3810	93.1375	31.9059	2	1
64W20	SAT64EL	EL	2011-10-29	-31.3042	29.9603	36	3806	151.511	-175.587	2	1
64W20	SAT64EL	EL	2011-10-29	-31.3072	29.9574	36	3800	161.401	-999	2	1
64W20	SAT64EL	EL	2011-10-29	-31.3084	29.9574	36	3815	183.07	-28.6892	2	1
64W20	SAT64EL	EL	2011-10-29	-31.3075	29.956	36	3819	184.925	109.083	2	1
64W20	SAT64EL	EL	2011-10-29	-31.3109	29.9586	55	3813	258.068	9.20567	2	1
64W20	SAT64EL	EL	2011-10-29	-31.3019	29.9598	36	3805	274.246	-101.576	2	1
64W20	SAT64EL	EL	2011-10-29	-31.3029	29.9602	36	3807	298.319	-29.7246	2	1
64W20	SAT64EL	EL	2011-10-29	-31.3009	29.9584	36	3808	331.427	59.1726	2	1
64W20	SAT64EL	EL	2011-10-29	-31.2984	29.9596	36	3809	340.809	-147.895	2	1
64W20	SAT64EL	EL	2011-10-29	-31.3051	29.959	36	3802	392.848	-0.401972	2	1
64W20	SAT64EL	EL	2011-10-29	-31.3084	29.9581	36	3801	403.619	-140.082	2	1
64W20	SAT64EL	EL	2011-10-29	-31.3129	29.9596	55	3814	583.409	-177.79	2	1
64W20	SAT64EL	EL	2011-10-29	-31.3001	29.9561	36	3811	716.808	-72.9704	2	1
64W20	SAT64EL	EL	2011-10-29	-31.3059	29.9545	36	3812	740.304	-48.2049	2	1
64W22	SAT64EL	EL	2011-11-07	-31.2925	30.0099	84	4212	1.65302	173.2	2	1
64W22	SAT64EL	EL	2011-11-07	-31.2925	30.0099	84	4215	2.6958	64.5203	2	1
64W22	SAT64EL	EL	2011-11-07	-31.2925	30.0099	84	4213	3.40935	180	2	1
64W22	SAT64EL	EL	2011-11-07	-31.2925	30.0099	84	4214	4.34107	66.1359	2	1
64W22	SAT64EL	EL	2011-11-06	-31.2992	30.0007	84	4202	6.23765	105.366	2	1
64W22	SAT64EL	EL	2011-11-06	-31.2977	30.0025	84	4207	6.51444	51.1068	2	1
64W22	SAT64EL	EL	2011-11-06	-31.2992	30.0007	84	4201	6.81775	-53.0802	2	1
64W22	SAT64EL	EL	2011-11-07	-31.2925	30.0101	84	4211	17.2715	-79.343	2	1
64W22	SAT64EL	EL	2011-11-07	-31.293	30.0101	55	4210	52.2088	-30.727	2	1
64W22	SAT64EL	EL	2011-11-06	-31.2991	30.0007	84	4203	53.7708	119.802	2	1
64W22	SAT64EL	EL	2011-11-06	-31.2995	30.0011	84	4200	60.1862	-999	2	1
64W22	SAT64EL	EL	2011-11-06	-31.2983	30.0025	84	4206	70.2716	-33.4226	2	1
64W22	SAT64EL	EL	2011-11-07	-31.2924	30.0099	84	4216	110.254	-131.719	2	1
64W22	SAT64EL	EL	2011-11-07	-31.294	30.0095	55	4209	137.154	-31.045	2	1
64W22	SAT64EL	EL	2011-11-07	-31.2897	30.005	55	4219	212.64	154.723	2	1
64W22	SAT64EL	EL	2011-11-06	-31.2994	30.001	84	4204	218.013	66.6105	2	1
64W22	SAT64EL	EL	2011-11-07	-31.2914	30.0063	84	4218	241.587	28.0655	2	1
64W22	SAT64EL	EL	2011-11-07	-31.2925	30.0088	84	4217	294.173	28.2416	2	1
64W22	SAT64EL	EL	2011-11-06	-31.3011	30.0003	84	4205	407.552	-167.006	2	1
64W22	SAT64EL	EL	2011-11-07	-31.2977	30.0026	84	4208	845.462	5.46208	2	1
64W24	SAT64EL	EL	2011-11-15	-31.3012	30.0004	84	4617	3.51208	-113.951	2	1
64W24	SAT64EL	EL	2011-11-15	-31.3032	29.9856	84	4608	11.1087	77.8099	2	1
64W24	SAT64EL	EL	2011-11-15	-31.3031	29.9857	84	4609	14.3327	-174.978	2	1
64W24	SAT64EL	EL	2011-11-15	-31.3011	29.9907	84	4605	32.1162	140.043	2	1
64W24	SAT64EL	EL	2011-11-15	-31.3012	30.0004	84	4618	66.6981	138.555	2	1
64W24	SAT64EL	EL	2011-11-15	-31.3008	30.0009	84	4619	72.1323	-174.265	2	1
64W24	SAT64EL	EL	2011-11-15	-31.3018	29.9891	84	4603	91.6409	97.3786	2	1
64W24	SAT64EL	EL	2011-11-15	-31.3032	29.9855	84	4610	212.894	146.873	2	1
64W24	SAT64EL	EL	2011-11-15	-31.3031	29.9854	84	4612	215.052	167.609	2	1
64W24	SAT64EL	EL	2011-11-15	-31.3026	29.9894	84	4604	219.696	-120.279	2	1
64W24	SAT64EL	EL	2011-11-15	-31.3018	29.9869	84	4611	222.535	-174.935	2	1
64W24	SAT64EL	EL	2011-11-15	-31.3016	29.9865	84	4613	326.071	123.372	2	1
64W24	SAT64EL	EL	2011-11-15	-31.3059	29.9861	84	4607	337.237	129.313	2	1
64W24	SAT64EL	EL	2011-11-15	-31.3032	29.986	84	4602	355.976	-49.0736	2	1
64W24	SAT64EL	EL	2011-11-15	-31.2987	29.9801	84	4600	429.908	-999	2	1
64W24	SAT64EL	EL	2011-11-15	-31.3018	29.9821	84	4601	439.813	-39.8606	2	1
64W24	SAT64EL	EL	2011-11-15	-31.3046	29.9987	55	4616	449.631	-52.962	2	1
64W24	SAT64EL	EL	2011-11-15	-31.3041	29.9877	84	4614	507.973	-41.6025	2	1
64W24	SAT64EL	EL	2011-11-15	-31.3059	29.9922	84	4615	682.169	-37.8168	2	1
64W24	SAT64EL	EL	2011-11-15	-31.3014	29.9907	84	4606	722.759	41.2726	2	1
64W25	SAT64EL	EL	2011-11-19	-31.3009	29.9789	84	4807	14.9901	-15.1153	2	1
64W25	SAT64EL	EL	2011-11-19	-31.3001	29.9798	84	4805	27.4262	6.84792	2	1
64W25	SAT64EL	EL	2011-11-19	-31.3096	29.9874	84	4818	55.0707	23.9568	2	1
64W25	SAT64EL	EL	2011-11-19	-31.2985	29.9755	84	4800	67.9155	-999	2	1
64W25	SAT64EL	EL	2011-11-19	-31.308	29.9914	55	4813	99.7422	-20.6165	2	1
64W25	SAT64EL	EL	2011-11-19	-31.3041	29.9869	84	4811	117.762	27.2193	2	1
64W25	SAT64EL	EL	2011-11-19	-31.304	29.9857	84	4810	123.926	-29.5725	2	1
64W25	SAT64EL	EL	2011-11-19	-31.3	29.9796	84	4806	125.218	-95.8665	2	1
64W25	SAT64EL	EL	2011-11-19	-31.3097	29.9901	55	4815	176.791	21.255	2	1
64W25	SAT64EL	EL	2011-11-19	-31.3113	29.9862	84	4817	230.391	154.559	2	1
64W25	SAT64EL	EL	2011-11-19	-31.2982	29.976	84	4801	241.459	30.6618	2	1
64W25	SAT64EL	EL	2011-11-19	-31.31	29.9884	55	4816	272.062	-20.9019	2	1
64W25	SAT64EL	EL	2011-11-19	-31.3084	29.9923	55	4814	273.222	119.34	2	1
64W25	SAT64EL	EL	2011-11-19	-31.2996	29.9814	84	4803	283.632	34.4739	2	1
64W25	SAT64EL	EL	2011-11-19	-31.3017	29.9825	84	4804	341.634	147.511	2	1
64W25	SAT64EL	EL	2011-11-19	-31.3094	29.9878	84	4819	355.888	178.462	2	1
64W25	SAT64EL	EL	2011-11-19	-31.2979	29.9783	84	4802	378.808	39.9469	2	1
64W25	SAT64EL	EL	2011-11-19	-31.3019	29.9827	84	4809	395.894	23.4185	2	1
64W25	SAT64EL	EL	2011-11-19	-31.301	29.9789	84	4808	412.621	-94.6647	2	1
64W25	SAT64EL	EL	2011-11-19	-31.3047	29.9878	84	4812	549.174	10.3432	2	1
64W27	SAT64EL	EL	2011-11-27	-31.2496	29.9975	34	5205	0	-999	2	1
64W27	SAT64EL	EL	2011-11-28	-31.2486	30.003	17	5215	0	-999	2	1
64W27	SAT64EL	EL	2011-11-27	-31.2496	29.9975	34	5206	3.97707	-999	2	1
64W27	SAT64EL	EL	2011-11-28	-31.2488	30.0029	17	5219	12.0937	-180	2	1
64W27	SAT64EL	EL	2011-11-27	-31.2486	30.0028	34	5211	12.5047	-31.3991	2	1
64W27	SAT64EL	EL	2011-11-28	-31.2487	30.0029	34	5214	13.108	-176.758	2	1
64W27	SAT64EL	EL	2011-11-27	-31.2496	29.9974	34	5204	14.3088	-21.9183	2	1
64W27	SAT64EL	EL	2011-11-28	-31.2486	30.003	17	5213	18.2685	-178.955	2	1
64W27	SAT64EL	EL	2011-11-27	-31.2496	29.9972	34	5203	19.0127	-55.9547	2	1
64W27	SAT64EL	EL	2011-11-28	-31.2487	30.0028	34	5212	20.9412	-116.405	2	1
64W27	SAT64EL	EL	2011-11-28	-31.2487	30.0026	34	5217	29.2523	-3.64401	2	1
64W27	SAT64EL	EL	2011-11-28	-31.2486	30.003	17	5216	35.9729	-999	2	1
64W27	SAT64EL	EL	2011-11-27	-31.2492	29.9969	34	5202	54.6191	-164.792	2	1
64W27	SAT64EL	EL	2011-11-28	-31.2488	30.0024	34	5218	55.0936	-160.041	2	1
64W27	SAT64EL	EL	2011-11-27	-31.2505	29.9983	34	5201	215.397	108.344	2	1
64W27	SAT64EL	EL	2011-11-27	-31.2409	30.0024	34	5209	294.213	69.4495	2	1
64W27	SAT64EL	EL	2011-11-27	-31.2445	30.0004	34	5208	470.927	-0.0891231	2	1
64W27	SAT64EL	EL	2011-11-27	-31.2464	30.0009	34	5200	557.558	-999	2	1
64W27	SAT64EL	EL	2011-11-27	-31.2496	29.9975	34	5207	692.373	147.077	2	1
64W27	SAT64EL	EL	2011-11-27	-31.2412	30.0052	34	5210	930.436	100.082	2	1
64W31	SAT64EL	EL	2011-12-14	-31.2978	29.9688	36	6006	0	-999	2	1
64W31	SAT64EL	EL	2011-12-14	-31.2977	29.9688	36	6005	2.04459	176.148	2	1
64W31	SAT64EL	EL	2011-12-14	-31.3043	29.9704	36	6014	4.45011	-145.637	2	1
64W31	SAT64EL	EL	2011-12-14	-31.3018	29.9721	36	6019	5.55397	119.358	2	1
64W31	SAT64EL	EL	2011-12-14	-31.3045	29.9708	36	6013	44.8896	94.7908	2	1
64W31	SAT64EL	EL	2011-12-14	-31.2979	29.9742	36	6010	74.1968	98.7871	2	1
64W31	SAT64EL	EL	2011-12-14	-31.3039	29.9712	36	6012	92.7017	0.889012	2	1
64W31	SAT64EL	EL	2011-12-14	-31.3044	29.9705	36	6015	125.83	149.373	2	1
64W31	SAT64EL	EL	2011-12-14	-31.2978	29.9688	36	6007	129.86	-999	2	1
64W31	SAT64EL	EL	2011-12-14	-31.3038	29.9695	36	6016	135.143	-105.276	2	1
64W31	SAT64EL	EL	2011-12-14	-31.3025	29.9732	36	6018	146.265	-108.496	2	1
64W31	SAT64EL	EL	2011-12-14	-31.2986	29.9696	36	6008	151.945	-28.7927	2	1
64W31	SAT64EL	EL	2011-12-14	-31.2943	29.9591	36	6000	197.28	-999	2	1
64W31	SAT64EL	EL	2011-12-14	-31.3001	29.9687	36	6004	281.346	-45.999	2	1
64W31	SAT64EL	EL	2011-12-14	-31.3017	29.9663	36	6003	310.76	-100.762	2	1
64W31	SAT64EL	EL	2011-12-14	-31.2992	29.9647	36	6002	347.272	14.2064	2	1
64W31	SAT64EL	EL	2011-12-14	-31.2991	29.971	36	6009	355.141	-43.9203	2	1
64W31	SAT64EL	EL	2011-12-14	-31.3048	29.969	36	6017	507.97	-143.324	2	1
64W31	SAT64EL	EL	2011-12-14	-31.2954	29.9605	36	6001	636.603	3.54508	2	1
64W31	SAT64EL	EL	2011-12-14	-31.2985	29.9744	36	6011	715.951	40.1633	2	1
64W32	SAT64EL	EL	2011-12-18	-31.3081	29.9576	36	6217	0	-999	2	1
64W32	SAT64EL	EL	2011-12-18	-31.3081	29.9576	36	6218	0	-999	2	1
64W32	SAT64EL	EL	2011-12-18	-31.3081	29.9576	36	6216	3.4076	-83.7377	2	1
64W32	SAT64EL	EL	2011-12-18	-31.2996	29.9589	36	6203	5.51051	68.4709	2	1
64W32	SAT64EL	EL	2011-12-18	-31.308	29.9576	36	6215	16.0906	-131.208	2	1
64W32	SAT64EL	EL	2011-12-18	-31.3081	29.9578	36	6214	31.493	-77.4248	2	1
64W32	SAT64EL	EL	2011-12-18	-31.3002	29.9581	36	6200	76.1258	-999	2	1
64W32	SAT64EL	EL	2011-12-18	-31.3004	29.9589	36	6202	92.258	-140.073	2	1
64W32	SAT64EL	EL	2011-12-18	-31.3061	29.9597	36	6208	98.7532	-45.1889	2	1
64W32	SAT64EL	EL	2011-12-18	-31.3059	29.9606	36	6209	109.179	144.422	2	1
64W32	SAT64EL	EL	2011-12-18	-31.2996	29.9581	36	6201	123.512	141.164	2	1
64W32	SAT64EL	EL	2011-12-18	-31.2996	29.9589	36	6204	128.23	100.421	2	1
64W32	SAT64EL	EL	2011-12-18	-31.3093	29.9572	36	6213	153.844	-109.449	2	1
64W32	SAT64EL	EL	2011-12-18	-31.3081	29.9576	36	6219	155.359	-999	2	1
64W32	SAT64EL	EL	2011-12-18	-31.3051	29.9575	36	6207	262.898	-138.111	2	1
64W32	SAT64EL	EL	2011-12-18	-31.3045	29.9601	36	6206	281.062	89.1949	2	1
64W32	SAT64EL	EL	2011-12-18	-31.3066	29.96	36	6210	325.674	22.1604	2	1
64W32	SAT64EL	EL	2011-12-18	-31.3079	29.9572	36	6211	331.724	50.0449	2	1
64W32	SAT64EL	EL	2011-12-18	-31.307	29.9542	55	6212	417.882	-158.325	2	1
64W32	SAT64EL	EL	2011-12-18	-31.3007	29.9591	36	6205	474.028	-2.35908	2	1
64W33	SAT64EL	EL	2011-12-22	-31.3087	29.9881	84	6404	1.75574	46.6341	2	1
64W33	SAT64EL	EL	2011-12-23	-31.3086	29.9884	84	6414	2.69513	-28.18	2	1
64W33	SAT64EL	EL	2011-12-23	-31.3079	29.9887	84	6417	3.9141	100.355	2	1
64W33	SAT64EL	EL	2011-12-23	-31.3079	29.9887	84	6416	5.32359	-62.5239	2	1
64W33	SAT64EL	EL	2011-12-22	-31.3083	29.9886	84	6401	5.55407	-31.1821	2	1
64W33	SAT64EL	EL	2011-12-22	-31.3087	29.9881	84	6406	6.23702	-148.362	2	1
64W33	SAT64EL	EL	2011-12-22	-31.3087	29.9881	84	6405	6.26511	-106.274	2	1
64W33	SAT64EL	EL	2011-12-23	-31.3085	29.9883	84	6413	8.13043	-151.65	2	1
64W33	SAT64EL	EL	2011-12-22	-31.3083	29.9886	84	6402	9.57155	101.049	2	1
64W33	SAT64EL	EL	2011-12-23	-31.3086	29.9884	84	6411	15.5743	70.206	2	1
64W33	SAT64EL	EL	2011-12-22	-31.309	29.9868	84	6408	24.9039	30.2317	2	1
64W33	SAT64EL	EL	2011-12-23	-31.3087	29.9885	84	6412	26.3845	165.557	2	1
64W33	SAT64EL	EL	2011-12-22	-31.3087	29.989	84	6400	65.4002	-999	2	1
64W33	SAT64EL	EL	2011-12-22	-31.3086	29.9878	84	6410	69.2406	10.7351	2	1
64W33	SAT64EL	EL	2011-12-23	-31.3079	29.9887	84	6418	69.2814	-30.784	2	1
64W33	SAT64EL	EL	2011-12-22	-31.3082	29.9886	84	6403	82.7269	-169.286	2	1
64W33	SAT64EL	EL	2011-12-23	-31.3086	29.9884	84	6415	89.0619	-116.633	2	1
64W33	SAT64EL	EL	2011-12-22	-31.3089	29.9866	84	6409	128.089	148.708	2	1
64W33	SAT64EL	EL	2011-12-22	-31.3087	29.9881	84	6407	136.197	-121.623	2	1
64W33	SAT64EL	EL	2011-12-23	-31.3074	29.989	84	6419	182.5	13.7672	2	1
64W39	SAT64EL	EL	2012-01-16	-31.2543	29.9665	38	7600	0	-999	2	1
64W39	SAT64EL	EL	2012-01-17	-31.2512	29.9661	38	7615	3.96917	-76.7444	2	1
64W39	SAT64EL	EL	2012-01-16	-31.2545	29.9664	38	7605	3.97612	-115.95	2	1
64W39	SAT64EL	EL	2012-01-17	-31.2512	29.9662	38	7614	8.91808	60.915	2	1
64W39	SAT64EL	EL	2012-01-16	-31.2543	29.9665	38	7601	9.17075	-999	2	1
64W39	SAT64EL	EL	2012-01-17	-31.2511	29.9662	38	7613	12.502	-168.021	2	1
64W39	SAT64EL	EL	2012-01-16	-31.2546	29.9664	38	7603	16.093	-27.3653	2	1
64W39	SAT64EL	EL	2012-01-16	-31.2547	29.9664	38	7604	20.163	-178.731	2	1
64W39	SAT64EL	EL	2012-01-16	-31.2545	29.9664	38	7606	22.6706	-159.136	2	1
64W39	SAT64EL	EL	2012-01-17	-31.2513	29.9662	38	7612	26.1594	44.5189	2	1
64W39	SAT64EL	EL	2012-01-17	-31.2513	29.9661	38	7616	39.9682	17.4528	2	1
64W39	SAT64EL	EL	2012-01-16	-31.2542	29.9666	38	7602	43.0596	152.077	2	1
64W39	SAT64EL	EL	2012-01-17	-31.2517	29.9665	38	7611	50.2675	48.1687	2	1
64W39	SAT64EL	EL	2012-01-17	-31.2517	29.9674	38	7610	94.7813	-8.81563	2	1
64W39	SAT64EL	EL	2012-01-17	-31.2529	29.9699	6	7608	133.466	-7.18143	2	1
64W39	SAT64EL	EL	2012-01-17	-31.2484	29.9686	38	7618	260.55	-35.7706	2	1
64W39	SAT64EL	EL	2012-01-17	-31.2522	29.9709	6	7609	370.706	-133.139	2	1
64W39	SAT64EL	EL	2012-01-17	-31.2545	29.9666	38	7607	396.645	-19.6184	2	1
64W39	SAT64EL	EL	2012-01-17	-31.2463	29.9685	38	7619	403.996	120.821	2	1
64W39	SAT64EL	EL	2012-01-17	-31.2516	29.966	38	7617	465.143	-162.432	2	1
64W40	SAT64EL	EL	2012-01-21	-31.2466	29.9711	38	7803	0	-999	2	1
64W40	SAT64EL	EL	2012-01-21	-31.2466	29.971	38	7806	2.69594	101.96	2	1
64W40	SAT64EL	EL	2012-01-21	-31.2466	29.9709	38	7805	4.00631	-158.367	2	1
64W40	SAT64EL	EL	2012-01-21	-31.2489	29.9727	38	7816	5.16731	158.41	2	1
64W40	SAT64EL	EL	2012-01-21	-31.2466	29.9711	38	7802	5.32511	139.465	2	1
64W40	SAT64EL	EL	2012-01-21	-31.2489	29.9728	38	7815	5.55716	57.3598	2	1
64W40	SAT64EL	EL	2012-01-21	-31.2465	29.9713	38	7800	6.01413	-999	2	1
64W40	SAT64EL	EL	2012-01-21	-31.2466	29.9711	38	7804	15.6212	-999	2	1
64W40	SAT64EL	EL	2012-01-21	-31.2466	29.9713	38	7801	24.425	80.3602	2	1
64W40	SAT64EL	EL	2012-01-21	-31.2466	29.9709	38	7807	58.1964	-44.0286	2	1
64W40	SAT64EL	EL	2012-01-21	-31.2489	29.9728	38	7817	93.3605	-25.4058	2	1
64W40	SAT64EL	EL	2012-01-21	-31.2472	29.9742	38	7819	109.904	83.4385	2	1
64W40	SAT64EL	EL	2012-01-21	-31.2486	29.9727	38	7811	111.469	15.3367	2	1
64W40	SAT64EL	EL	2012-01-21	-31.2483	29.9737	38	7814	116.676	-132.182	2	1
64W40	SAT64EL	EL	2012-01-21	-31.2493	29.9735	38	7813	123.099	-84.9896	2	1
64W40	SAT64EL	EL	2012-01-21	-31.2461	29.9731	31	7809	125.84	30.7724	2	1
64W40	SAT64EL	EL	2012-01-21	-31.2493	29.9719	38	7812	167.16	-132.654	2	1
64W40	SAT64EL	EL	2012-01-21	-31.2485	29.9736	38	7818	168.906	-44.2933	2	1
64W40	SAT64EL	EL	2012-01-21	-31.2471	29.971	38	7808	244.163	-115.605	2	1
64W40	SAT64EL	EL	2012-01-21	-31.2461	29.9743	31	7810	340.696	116.912	2	1
64W41	SAT64EL	EL	2012-01-25	-31.2463	29.9673	38	8015	26.1821	-11.804	2	1
64W41	SAT64EL	EL	2012-01-25	-31.2525	29.97	6	8003	40.9372	42.0072	2	1
64W41	SAT64EL	EL	2012-01-25	-31.2506	29.9718	38	8008	60.6109	-124.569	2	1
64W41	SAT64EL	EL	2012-01-25	-31.251	29.9721	38	8009	99.2269	22.8027	2	1
64W41	SAT64EL	EL	2012-01-25	-31.246	29.97	38	8019	105.185	-124.408	2	1
64W41	SAT64EL	EL	2012-01-25	-31.2481	29.9671	38	8013	105.571	-7.2572	2	1
64W41	SAT64EL	EL	2012-01-25	-31.2555	29.965	38	8000	125.054	-999	2	1
64W41	SAT64EL	EL	2012-01-25	-31.2515	29.9743	38	8006	129.901	-161.234	2	1
64W41	SAT64EL	EL	2012-01-25	-31.2451	29.9707	31	8018	132.735	1.65921	2	1
64W41	SAT64EL	EL	2012-01-25	-31.2439	29.9715	31	8017	162.808	152.578	2	1
64W41	SAT64EL	EL	2012-01-25	-31.2507	29.9735	38	8007	181.251	-46.6693	2	1
64W41	SAT64EL	EL	2012-01-25	-31.2478	29.9661	38	8014	213.049	106.244	2	1
64W41	SAT64EL	EL	2012-01-25	-31.2505	29.9724	38	8005	228.856	78.1545	2	1
64W41	SAT64EL	EL	2012-01-25	-31.2518	29.9722	38	8010	231.391	-120.632	2	1
64W41	SAT64EL	EL	2012-01-25	-31.2523	29.9704	6	8004	309.864	-13.9193	2	1
64W41	SAT64EL	EL	2012-01-25	-31.2563	29.9658	38	8001	354.319	-67.4611	2	1
64W41	SAT64EL	EL	2012-01-25	-31.2555	29.9691	6	8002	368.157	-58.7755	2	1
64W41	SAT64EL	EL	2012-01-25	-31.2506	29.9739	38	8011	405.756	70.5036	2	1
64W41	SAT64EL	EL	2012-01-25	-31.2462	29.9674	38	8016	506.061	34.6955	2	1
64W41	SAT64EL	EL	2012-01-25	-31.2524	29.9773	10	8012	1177.22	174.152	2	1
64W49	SAT64EL	EL	2012-02-27	-31.2284	29.9685	31	9605	1.75729	123.834	2	1
64W49	SAT64EL	EL	2012-02-28	-31.2309	29.9686	31	9619	2.53753	100.599	2	1
64W49	SAT64EL	EL	2012-02-28	-31.2275	29.9628	31	9614	2.69613	81.3505	2	1
64W49	SAT64EL	EL	2012-02-28	-31.2275	29.9628	31	9615	5.16837	49.3241	2	1
64W49	SAT64EL	EL	2012-02-27	-31.2267	29.9666	31	9608	5.16854	-21.2003	2	1
64W49	SAT64EL	EL	2012-02-27	-31.2294	29.9694	31	9602	14.0733	115.187	2	1
64W49	SAT64EL	EL	2012-02-27	-31.2285	29.9686	31	9604	21.721	10.0339	2	1
64W49	SAT64EL	EL	2012-02-28	-31.2277	29.9629	31	9613	23.789	130.531	2	1
64W49	SAT64EL	EL	2012-02-28	-31.227	29.9631	31	9612	79.1125	-23.4146	2	1
64W49	SAT64EL	EL	2012-02-27	-31.227	29.9673	31	9607	83.1552	-33.1205	2	1
64W49	SAT64EL	EL	2012-02-28	-31.2316	29.9679	31	9618	113.016	-95.7185	2	1
64W49	SAT64EL	EL	2012-02-27	-31.2293	29.9694	31	9603	116.792	-43.8696	2	1
64W49	SAT64EL	EL	2012-02-27	-31.2267	29.9665	31	9609	119.563	11.6069	2	1
64W49	SAT64EL	EL	2012-02-27	-31.226	29.9638	31	9611	142.158	-78.9793	2	1
64W49	SAT64EL	EL	2012-02-27	-31.2265	29.9654	31	9610	177.382	9.57944	2	1
64W49	SAT64EL	EL	2012-02-27	-31.2284	29.9685	31	9606	209.832	-125.681	2	1
64W49	SAT64EL	EL	2012-02-28	-31.2304	29.9664	31	9617	214.718	1.49134	2	1
64W49	SAT64EL	EL	2012-02-28	-31.2275	29.9629	31	9616	506.047	42.9589	2	1
64W49	SAT64EL	EL	2012-02-27	-31.2268	29.9758	31	9601	734.874	-23.3542	2	1
64W49	SAT64EL	EL	2012-02-27	-31.2265	29.9855	31	9600	1001.65	-999	2	1
64W5	SAT64EL	EL	2011-08-27	-31.2967	29.9923	84	811	0	-999	2	1
64W5	SAT64EL	EL	2011-08-28	-31.2967	29.9923	84	813	0	-999	2	1
64W5	SAT64EL	EL	2011-08-27	-31.2966	29.9923	84	806	1.75605	-93.8499	2	1
64W5	SAT64EL	EL	2011-08-28	-31.2967	29.9923	84	812	2.04489	-999	2	1
64W5	SAT64EL	EL	2011-08-27	-31.2966	29.9923	84	807	2.04489	90.001	2	1
64W5	SAT64EL	EL	2011-08-27	-31.2967	29.9923	84	809	2.60532	153.898	2	1
64W5	SAT64EL	EL	2011-08-27	-31.2968	29.9922	84	801	2.62931	-162.981	2	1
64W5	SAT64EL	EL	2011-08-27	-31.2967	29.9923	84	810	3.96949	-137.622	2	1
64W5	SAT64EL	EL	2011-08-28	-31.2963	29.9927	84	819	4.06403	85.8814	2	1
64W5	SAT64EL	EL	2011-08-27	-31.2968	29.9922	84	802	5.30011	99.5521	2	1
64W5	SAT64EL	EL	2011-08-27	-31.2966	29.9923	84	808	6.26547	163.723	2	1
64W5	SAT64EL	EL	2011-08-27	-31.2969	29.9923	84	804	9.47109	-165.051	2	1
64W5	SAT64EL	EL	2011-08-28	-31.2962	29.9928	84	818	12.0897	161.872	2	1
64W5	SAT64EL	EL	2011-08-28	-31.2963	29.9927	84	817	13.0283	80.3032	2	1
64W5	SAT64EL	EL	2011-08-27	-31.2968	29.9922	84	803	20.8511	173.506	2	1
64W5	SAT64EL	EL	2011-08-27	-31.2969	29.9923	84	805	26.1614	36.8957	2	1
64W5	SAT64EL	EL	2011-08-28	-31.2967	29.9923	84	814	53.9596	-999	2	1
64W5	SAT64EL	EL	2011-08-28	-31.2964	29.9926	84	815	54.9641	101.365	2	1
64W5	SAT64EL	EL	2011-08-28	-31.2967	29.993	84	816	59.0423	-171.281	2	1
64W5	SAT64EL	EL	2011-08-27	-31.2984	29.9915	84	800	207.468	-999	2	1
64W50	SAT64EL	EL	2012-03-03	-31.2995	29.9808	84	9810	1.75586	150.55	2	1
64W50	SAT64EL	EL	2012-03-03	-31.2995	29.9808	84	9811	1.75586	-180	2	1
64W50	SAT64EL	EL	2012-03-02	-31.2992	29.9812	84	9800	1.75588	-999	2	1
64W50	SAT64EL	EL	2012-03-03	-31.2985	29.9802	84	9804	3.51176	-30.9597	2	1
64W50	SAT64EL	EL	2012-03-03	-31.2995	29.9808	84	9809	3.91418	-175.249	2	1
64W50	SAT64EL	EL	2012-03-02	-31.2992	29.9812	84	9801	3.97472	30.9598	2	1
64W50	SAT64EL	EL	2012-03-03	-31.2985	29.9802	84	9803	3.97472	173.836	2	1
64W50	SAT64EL	EL	2012-03-03	-31.3015	29.9815	84	9819	8.81309	-119.238	2	1
64W50	SAT64EL	EL	2012-03-03	-31.3014	29.9815	84	9816	12.1345	23.706	2	1
64W50	SAT64EL	EL	2012-03-03	-31.3016	29.9815	84	9818	12.5015	166.13	2	1
64W50	SAT64EL	EL	2012-03-03	-31.2988	29.9797	84	9806	22.9958	-1.14325	2	1
64W50	SAT64EL	EL	2012-03-03	-31.3014	29.9816	84	9817	34.6145	110.566	2	1
64W50	SAT64EL	EL	2012-03-03	-31.3003	29.9809	84	9813	57.3309	28.2202	2	1
64W50	SAT64EL	EL	2012-03-03	-31.2985	29.9803	84	9805	66.5123	155.08	2	1
64W50	SAT64EL	EL	2012-03-03	-31.2993	29.9801	84	9808	71.963	-11.2916	2	1
64W50	SAT64EL	EL	2012-03-03	-31.2989	29.9795	84	9807	85.1441	-117.946	2	1
64W50	SAT64EL	EL	2012-03-03	-31.2995	29.9808	84	9812	99.3623	-98.9691	2	1
64W50	SAT64EL	EL	2012-03-03	-31.3008	29.9807	84	9814	114.896	5.5724	2	1
64W50	SAT64EL	EL	2012-03-03	-31.2992	29.9812	84	9802	129.538	6.16328	2	1
64W50	SAT64EL	EL	2012-03-03	-31.3016	29.9803	84	9815	135.216	-129.403	2	1
64W52	SAT64EL	EL	2012-03-11	-31.2348	29.9861	31	10219	38.1709	-91.0045	2	1
64W52	SAT64EL	EL	2012-03-11	-31.2324	29.9874	41	10203	52.3913	-34.6694	2	1
64W52	SAT64EL	EL	2012-03-11	-31.2358	29.9898	31	10217	67.5361	143.209	2	1
64W52	SAT64EL	EL	2012-03-11	-31.2328	29.9873	41	10204	167.143	-98.9401	2	1
64W52	SAT64EL	EL	2012-03-11	-31.233	29.9889	41	10205	178.088	-144.026	2	1
64W52	SAT64EL	EL	2012-03-11	-31.2377	29.9863	31	10215	181.687	-1.50147	2	1
64W52	SAT64EL	EL	2012-03-11	-31.2299	29.9923	31	10207	242.894	153.847	2	1
64W52	SAT64EL	EL	2012-03-11	-31.2366	29.9874	31	10216	261.16	25.1325	2	1
64W52	SAT64EL	EL	2012-03-11	-31.2282	29.9913	31	10201	267.771	-177.08	2	1
64W52	SAT64EL	EL	2012-03-11	-31.2451	29.9837	15	10211	279.023	-88.7045	2	1
64W52	SAT64EL	EL	2012-03-11	-31.2436	29.9806	31	10210	363.89	-85.298	2	1
64W52	SAT64EL	EL	2012-03-11	-31.2363	29.9895	31	10218	389.828	87.2467	2	1
64W52	SAT64EL	EL	2012-03-11	-31.2303	29.9905	41	10202	402.861	33.8934	2	1
64W52	SAT64EL	EL	2012-03-11	-31.246	29.9806	31	10213	478.268	138.605	2	1
64W52	SAT64EL	EL	2012-03-11	-31.2315	29.9909	41	10208	506.527	38.2123	2	1
64W52	SAT64EL	EL	2012-03-11	-31.232	29.9876	41	10206	543.773	109.489	2	1
64W52	SAT64EL	EL	2012-03-11	-31.2431	29.985	15	10212	574.48	-156.982	2	1
64W52	SAT64EL	EL	2012-03-11	-31.242	29.9815	31	10214	716.752	32.5908	2	1
64W52	SAT64EL	EL	2012-03-11	-31.2352	29.9891	31	10200	867.983	-999	2	1
64W52	SAT64EL	EL	2012-03-11	-31.2326	29.9862	31	10209	1450.52	-52.2026	2	1
64W6	SAT64EL	EL	2011-09-01	-31.2914	30.0106	84	1003	0	-999	2	1
64W6	SAT64EL	EL	2011-09-01	-31.2914	30.0106	84	1005	0	-999	2	1
64W6	SAT64EL	EL	2011-09-01	-31.2899	30.0098	84	1012	0	-999	2	1
64W6	SAT64EL	EL	2011-09-01	-31.2914	30.0106	84	1004	1.75636	-999	2	1
64W6	SAT64EL	EL	2011-08-31	-31.2914	30.0107	84	1002	1.75636	64.919	2	1
64W6	SAT64EL	EL	2011-09-01	-31.2963	29.9928	84	1019	12.0858	-165.491	2	1
64W6	SAT64EL	EL	2011-09-01	-31.2897	30.0098	84	1011	20.167	24.51	2	1
64W6	SAT64EL	EL	2011-09-01	-31.2899	30.0098	84	1013	44.3779	-999	2	1
64W6	SAT64EL	EL	2011-08-31	-31.291	30.0109	84	1001	48.7474	-36.7749	2	1
64W6	SAT64EL	EL	2011-09-01	-31.2901	30.0095	84	1014	69.581	-62.2183	2	1
64W6	SAT64EL	EL	2011-09-01	-31.2891	30.0108	55	1008	82.2466	-102.437	2	1
64W6	SAT64EL	EL	2011-09-01	-31.2893	30.01	84	1009	87.2306	42.8641	2	1
64W6	SAT64EL	EL	2011-09-01	-31.289	30.0093	84	1010	101.321	-146.844	2	1
64W6	SAT64EL	EL	2011-09-01	-31.2902	30.0109	84	1007	126.502	-13.3769	2	1
64W6	SAT64EL	EL	2011-09-01	-31.2914	30.0106	84	1006	144.643	-999	2	1
64W6	SAT64EL	EL	2011-09-01	-31.2967	29.991	84	1018	192.06	-134.516	2	1
64W6	SAT64EL	EL	2011-09-01	-31.2948	29.9922	84	1017	261.701	-47.737	2	1
64W6	SAT64EL	EL	2011-09-01	-31.2907	30.0096	84	1015	427.741	75.2568	2	1
64W6	SAT64EL	EL	2011-09-01	-31.2922	30.0059	84	1016	1444.72	13.8683	2	1
64W8	SAT64EL	EL	2011-09-09	-31.2938	29.9634	36	1404	6.26441	37.6054	2	1
64W8	SAT64EL	EL	2011-09-09	-31.2932	29.9618	36	1411	7.93756	-176.489	2	1
64W8	SAT64EL	EL	2011-09-09	-31.2897	29.9633	84	1413	46.6592	64.4961	2	1
64W8	SAT64EL	EL	2011-09-09	-31.2937	29.9634	36	1405	56.6443	-25.7264	2	1
64W8	SAT64EL	EL	2011-09-09	-31.2934	29.963	36	1406	60.369	85.1873	2	1
64W8	SAT64EL	EL	2011-09-09	-31.292	29.9721	36	1419	66.7924	62.7169	2	1
64W8	SAT64EL	EL	2011-09-09	-31.2941	29.964	36	1403	68.1465	60.0714	2	1
64W8	SAT64EL	EL	2011-09-09	-31.2909	29.9721	36	1418	134.269	81.8641	2	1
64W8	SAT64EL	EL	2011-09-09	-31.2921	29.9609	84	1409	143.055	142.986	2	1
64W8	SAT64EL	EL	2011-09-09	-31.2889	29.9655	84	1415	143.672	-6.74425	2	1
64W8	SAT64EL	EL	2011-09-09	-31.2916	29.9626	84	1408	179.718	-82.5937	2	1
64W8	SAT64EL	EL	2011-09-09	-31.293	29.9634	36	1407	196.794	-70.7933	2	1
64W8	SAT64EL	EL	2011-09-09	-31.2896	29.9638	84	1414	199.533	-21.1917	2	1
64W8	SAT64EL	EL	2011-09-09	-31.2911	29.9617	84	1410	253.033	143.705	2	1
64W8	SAT64EL	EL	2011-09-09	-31.2926	29.9639	36	1401	254.024	48.1142	2	1
64W8	SAT64EL	EL	2011-09-09	-31.2932	29.9663	36	1402	261.864	137.666	2	1
64W8	SAT64EL	EL	2011-09-09	-31.2939	29.9612	36	1400	319.124	-999	2	1
64W8	SAT64EL	EL	2011-09-09	-31.2905	29.9689	36	1417	327.592	-43.2797	2	1
64W8	SAT64EL	EL	2011-09-09	-31.2883	29.9667	84	1416	361.29	82.9316	2	1
64W8	SAT64EL	EL	2011-09-09	-31.2931	29.9618	36	1412	442.904	20.4748	2	1
65W13	SAT65	EL	2011-10-02	-31.2968	29.9578	36	2405	1.9242	117.983	2	1
65W13	SAT65	EL	2011-10-02	-31.2998	29.9577	36	2416	4.41011	19.4971	2	1
65W13	SAT65	EL	2011-10-02	-31.2998	29.9577	36	2415	5.29889	60.6411	2	1
65W13	SAT65	EL	2011-10-02	-31.2999	29.9577	36	2417	6.5864	150.378	2	1
65W13	SAT65	EL	2011-10-02	-31.3012	29.9572	36	2401	12.4996	55.182	2	1
65W13	SAT65	EL	2011-10-02	-31.2968	29.9578	36	2406	19.5777	-135.445	2	1
65W13	SAT65	EL	2011-10-02	-31.2956	29.9576	36	2409	50.5382	57.8138	2	1
65W13	SAT65	EL	2011-10-02	-31.2971	29.9572	36	2404	68.1803	77.592	2	1
65W13	SAT65	EL	2011-10-02	-31.301	29.9564	36	2400	80.1656	-999	2	1
65W13	SAT65	EL	2011-10-02	-31.2953	29.9585	36	2412	108.458	-103.082	2	1
65W13	SAT65	EL	2011-10-02	-31.2967	29.9579	36	2407	112.716	64.1125	2	1
65W13	SAT65	EL	2011-10-02	-31.2964	29.9582	36	2411	134.414	-148.844	2	1
65W13	SAT65	EL	2011-10-02	-31.2952	29.9578	36	2410	146.805	145.091	2	1
65W13	SAT65	EL	2011-10-02	-31.2984	29.9577	36	2403	166.544	-23.2102	2	1
65W13	SAT65	EL	2011-10-02	-31.2998	29.9577	36	2418	166.636	-52.324	2	1
65W13	SAT65	EL	2011-10-02	-31.3001	29.956	36	2414	181.267	-117.162	2	1
65W13	SAT65	EL	2011-10-02	-31.297	29.959	36	2408	214.492	-148.632	2	1
65W13	SAT65	EL	2011-10-02	-31.3013	29.9572	36	2402	349.815	-156.545	2	1
65W13	SAT65	EL	2011-10-02	-31.3002	29.9561	36	2419	452.282	146.578	2	1
65W13	SAT65	EL	2011-10-02	-31.2953	29.9575	36	2413	597.681	-75.9937	2	1
65W18	SAT65	EL	2011-10-22	-31.3004	29.9581	36	3400	1.65233	-999	2	1
65W18	SAT65	EL	2011-10-23	-31.3039	29.959	36	3407	3.4078	-162.35	2	1
65W18	SAT65	EL	2011-10-23	-31.3039	29.959	36	3408	3.4078	-180	2	1
65W18	SAT65	EL	2011-10-23	-31.3004	29.9581	36	3401	10.5298	-48.9199	2	1
65W18	SAT65	EL	2011-10-23	-31.3004	29.958	36	3402	13.025	-168.625	2	1
65W18	SAT65	EL	2011-10-23	-31.3039	29.9588	36	3406	19.8315	-107.651	2	1
65W18	SAT65	EL	2011-10-23	-31.3041	29.965	36	3416	35.881	-160.895	2	1
65W18	SAT65	EL	2011-10-23	-31.3043	29.9648	36	3415	36.1165	-20.7875	2	1
65W18	SAT65	EL	2011-10-23	-31.3004	29.9581	36	3403	62.0799	125.926	2	1
65W18	SAT65	EL	2011-10-23	-31.3049	29.9614	36	3412	85.714	11.044	2	1
65W18	SAT65	EL	2011-10-23	-31.304	29.9671	36	3419	99.794	-30.8283	2	1
65W18	SAT65	EL	2011-10-23	-31.3037	29.9661	36	3418	110.835	42.3687	2	1
65W18	SAT65	EL	2011-10-23	-31.3027	29.9588	36	3405	140.345	17.5908	2	1
65W18	SAT65	EL	2011-10-23	-31.3053	29.9622	36	3413	144.437	-1.59138	2	1
65W18	SAT65	EL	2011-10-23	-31.3044	29.9601	36	3411	147.91	54.4136	2	1
65W18	SAT65	EL	2011-10-23	-31.3043	29.9647	36	3417	152.146	-155.278	2	1
65W18	SAT65	EL	2011-10-23	-31.3039	29.959	36	3409	183.339	105.787	2	1
65W18	SAT65	EL	2011-10-23	-31.3053	29.9585	36	3410	198.993	-138.738	2	1
65W18	SAT65	EL	2011-10-23	-31.3009	29.9581	36	3404	233.396	-15.9687	2	1
65W18	SAT65	EL	2011-10-23	-31.3059	29.9633	36	3414	239.335	-80.5791	2	1
65W19	SAT65	EL	2011-10-27	-31.2984	29.9733	36	3614	0	-999	2	1
65W19	SAT65	EL	2011-10-27	-31.2936	29.972	36	3608	5.51132	-173.881	2	1
65W19	SAT65	EL	2011-10-27	-31.2937	29.972	36	3610	6.23664	162.319	2	1
65W19	SAT65	EL	2011-10-27	-31.2964	29.9735	36	3619	8.24746	-175.578	2	1
65W19	SAT65	EL	2011-10-27	-31.2936	29.972	36	3609	9.47022	143.485	2	1
65W19	SAT65	EL	2011-10-27	-31.2984	29.9733	36	3615	13.1584	-999	2	1
65W19	SAT65	EL	2011-10-27	-31.2992	29.9729	36	3617	68.5448	-25.9988	2	1
65W19	SAT65	EL	2011-10-27	-31.2985	29.9732	36	3616	89.7122	-20.4485	2	1
65W19	SAT65	EL	2011-10-27	-31.2928	29.975	36	3601	124.831	97.9091	2	1
65W19	SAT65	EL	2011-10-27	-31.2931	29.9738	36	3600	129.151	-999	2	1
65W19	SAT65	EL	2011-10-27	-31.2936	29.972	36	3611	135.988	87.4077	2	1
65W19	SAT65	EL	2011-10-27	-31.2939	29.9733	36	3612	272.612	53.0024	2	1
65W19	SAT65	EL	2011-10-27	-31.2925	29.9746	36	3607	300.231	179.676	2	1
65W19	SAT65	EL	2011-10-27	-31.2966	29.9682	36	3603	301.268	-68.8365	2	1
65W19	SAT65	EL	2011-10-27	-31.2991	29.9684	36	3604	314.43	-150.415	2	1
65W19	SAT65	EL	2011-10-27	-31.296	29.9744	36	3613	320.246	44.3548	2	1
65W19	SAT65	EL	2011-10-27	-31.2938	29.9714	36	3606	362.721	36.9109	2	1
65W19	SAT65	EL	2011-10-27	-31.2967	29.9697	36	3605	388.669	0.868745	2	1
65W19	SAT65	EL	2011-10-27	-31.2998	29.973	36	3618	414.882	-166.337	2	1
65W19	SAT65	EL	2011-10-27	-31.2938	29.9751	36	3602	784.83	70.7929	2	1
65W23	SAT65	EL	2011-11-13	-31.3095	29.9743	36	4405	1.75558	152.284	2	1
65W23	SAT65	EL	2011-11-13	-31.3095	29.9744	36	4406	3.97422	-30.9621	2	1
65W23	SAT65	EL	2011-11-13	-31.3094	29.9744	36	4407	4.06306	61.1755	2	1
65W23	SAT65	EL	2011-11-12	-31.3068	29.9698	36	4400	9.16715	-999	2	1
65W23	SAT65	EL	2011-11-13	-31.308	29.9748	36	4411	10.5821	-22.1644	2	1
65W23	SAT65	EL	2011-11-13	-31.3096	29.9745	36	4404	21.464	86.9739	2	1
65W23	SAT65	EL	2011-11-13	-31.3095	29.9744	36	4408	32.1253	-91.3839	2	1
65W23	SAT65	EL	2011-11-13	-31.3083	29.9748	36	4410	36.1244	-9.74713	2	1
65W23	SAT65	EL	2011-11-13	-31.3136	29.9733	36	4416	46.4308	91.1527	2	1
65W23	SAT65	EL	2011-11-13	-31.308	29.9748	36	4412	98.4103	31.4939	2	1
65W23	SAT65	EL	2011-11-13	-31.3092	29.9746	36	4409	110.888	-16.296	2	1
65W23	SAT65	EL	2011-11-13	-31.3103	29.9756	36	4419	177.783	88.7107	2	1
65W23	SAT65	EL	2011-11-13	-31.311	29.974	36	4418	179.624	43.7287	2	1
65W23	SAT65	EL	2011-11-13	-31.3072	29.975	36	4413	229.884	118.727	2	1
65W23	SAT65	EL	2011-11-12	-31.3076	29.9758	36	4403	265.879	80.6992	2	1
65W23	SAT65	EL	2011-11-12	-31.3062	29.9738	84	4402	274.245	49.9457	2	1
65W23	SAT65	EL	2011-11-13	-31.3133	29.973	36	4417	295.271	59.4765	2	1
65W23	SAT65	EL	2011-11-13	-31.3084	29.9767	55	4414	336.924	50.9157	2	1
65W23	SAT65	EL	2011-11-12	-31.3068	29.9697	36	4401	431.597	-148.905	2	1
65W23	SAT65	EL	2011-11-13	-31.3112	29.9766	36	4415	441.436	48.0843	2	1
65W3	SAT65	EL	2011-08-21	-31.3054	29.9911	84	406	32.2964	21.286	2	1
65W3	SAT65	EL	2011-08-21	-31.2929	30.0094	84	419	60.4762	26.4932	2	1
65W3	SAT65	EL	2011-08-21	-31.3078	29.9931	55	411	63.8814	81.1324	2	1
65W3	SAT65	EL	2011-08-21	-31.3051	29.9911	84	407	70.2132	146.493	2	1
65W3	SAT65	EL	2011-08-21	-31.3084	29.9937	55	410	101.102	148.133	2	1
65W3	SAT65	EL	2011-08-21	-31.3063	29.9839	84	400	115.381	-999	2	1
65W3	SAT65	EL	2011-08-21	-31.3082	29.9908	55	403	168.621	36.9239	2	1
65W3	SAT65	EL	2011-08-21	-31.3068	29.9934	55	409	198.023	41.4097	2	1
65W3	SAT65	EL	2011-08-21	-31.3072	29.996	55	413	199.14	-96.847	2	1
65W3	SAT65	EL	2011-08-21	-31.3055	29.9915	84	408	243.343	-12.8474	2	1
65W3	SAT65	EL	2011-08-21	-31.2947	30.0082	84	418	247.844	-11.9415	2	1
65W3	SAT65	EL	2011-08-21	-31.3064	29.9894	84	402	258.754	55.5233	2	1
65W3	SAT65	EL	2011-08-21	-31.3073	29.9934	55	412	263.651	49.1245	2	1
65W3	SAT65	EL	2011-08-21	-31.3096	29.9907	55	404	271.254	-120.241	2	1
65W3	SAT65	EL	2011-08-21	-31.3056	29.9957	55	414	284.31	22.7792	2	1
65W3	SAT65	EL	2011-08-21	-31.297	30.0058	84	417	374.871	-3.27783	2	1
65W3	SAT65	EL	2011-08-21	-31.3085	29.993	55	405	431.03	-90.0536	2	1
65W3	SAT65	EL	2011-08-21	-31.3063	29.985	84	401	449.291	-0.507556	2	1
65W3	SAT65	EL	2011-08-21	-31.3033	29.9963	84	415	465.071	52.7728	2	1
65W3	SAT65	EL	2011-08-21	-31.3017	30.0004	84	416	795.929	-21.7588	2	1
65W30	SAT65	EL	2011-12-12	-31.3035	29.9582	36	5809	2.04444	-38.9439	2	1
65W30	SAT65	EL	2011-12-12	-31.3035	29.9582	36	5808	2.62866	54.568	2	1
65W30	SAT65	EL	2011-12-12	-31.3016	29.9635	36	5815	3.408	-176.953	2	1
65W30	SAT65	EL	2011-12-12	-31.3016	29.9635	36	5816	3.408	180	2	1
65W30	SAT65	EL	2011-12-12	-31.3023	29.9601	36	5802	3.51116	149.418	2	1
65W30	SAT65	EL	2011-12-12	-31.3023	29.96	36	5801	8.0369	50.8663	2	1
65W30	SAT65	EL	2011-12-12	-31.3016	29.9635	36	5817	17.0482	135.134	2	1
65W30	SAT65	EL	2011-12-12	-31.3016	29.9639	36	5814	36.1967	-134.478	2	1
65W30	SAT65	EL	2011-12-12	-31.3015	29.9636	36	5818	48.5966	-63.7219	2	1
65W30	SAT65	EL	2011-12-12	-31.3035	29.9582	36	5810	51.8168	140.82	2	1
65W30	SAT65	EL	2011-12-12	-31.3047	29.9623	36	5804	64.0767	24.2489	2	1
65W30	SAT65	EL	2011-12-12	-31.3038	29.9585	36	5811	100.957	15.0287	2	1
65W30	SAT65	EL	2011-12-12	-31.3011	29.9635	36	5819	128.667	-89.548	2	1
65W30	SAT65	EL	2011-12-12	-31.3053	29.9625	36	5805	144.327	13.2929	2	1
65W30	SAT65	EL	2011-12-12	-31.305	29.9587	36	5807	185.19	50.2288	2	1
65W30	SAT65	EL	2011-12-12	-31.3028	29.9583	36	5800	190.798	-999	2	1
65W30	SAT65	EL	2011-12-12	-31.3034	29.962	36	5813	288.729	-23.6632	2	1
65W30	SAT65	EL	2011-12-12	-31.3046	29.959	36	5812	347.263	-90.7539	2	1
65W30	SAT65	EL	2011-12-12	-31.3023	29.9601	36	5803	369.915	-128.235	2	1
65W30	SAT65	EL	2011-12-12	-31.3065	29.9625	36	5806	426.295	114.841	2	1
65W33	SAT65	EL	2011-12-25	-31.3021	29.9984	84	6416	2.04495	-111.6	2	1
65W33	SAT65	EL	2011-12-24	-31.3043	29.996	84	6401	2.69533	-113.573	2	1
65W33	SAT65	EL	2011-12-24	-31.3043	29.9959	84	6403	4.29978	-75.0563	2	1
65W33	SAT65	EL	2011-12-25	-31.3021	29.9984	84	6415	5.55478	-136.798	2	1
65W33	SAT65	EL	2011-12-25	-31.302	29.9984	84	6414	5.55485	147.121	2	1
65W33	SAT65	EL	2011-12-25	-31.3021	29.9984	84	6417	5.55485	68.3982	2	1
65W33	SAT65	EL	2011-12-24	-31.3043	29.996	84	6402	6.51381	93.1052	2	1
65W33	SAT65	EL	2011-12-24	-31.3044	29.9959	84	6404	12.1549	102.917	2	1
65W33	SAT65	EL	2011-12-25	-31.3044	29.9978	84	6419	24.9968	41.3863	2	1
65W33	SAT65	EL	2011-12-25	-31.301	29.9905	84	6410	26.608	81.8115	2	1
65W33	SAT65	EL	2011-12-25	-31.3011	29.9909	84	6409	42.046	-25.038	2	1
65W33	SAT65	EL	2011-12-25	-31.3	29.9892	84	6412	52.3615	-99.0683	2	1
65W33	SAT65	EL	2011-12-24	-31.3041	29.9966	84	6400	68.3992	-999	2	1
65W33	SAT65	EL	2011-12-24	-31.3044	29.9958	84	6405	72.9177	-4.64132	2	1
65W33	SAT65	EL	2011-12-24	-31.3033	29.9943	84	6407	92.6986	-48.6374	2	1
65W33	SAT65	EL	2011-12-25	-31.3008	29.9905	84	6411	164.977	-68.8883	2	1
65W33	SAT65	EL	2011-12-24	-31.3045	29.9951	84	6406	171.554	72.9005	2	1
65W33	SAT65	EL	2011-12-25	-31.302	29.9985	84	6418	291.784	125.95	2	1
65W33	SAT65	EL	2011-12-24	-31.3032	29.9934	84	6408	363.839	34.4784	2	1
65W33	SAT65	EL	2011-12-25	-31.3004	29.989	84	6413	993.653	-101.953	2	1
65W36	SAT65	EL	2012-01-06	-31.3133	29.9824	84	7019	7.92647	-159.099	2	1
65W36	SAT65	EL	2012-01-06	-31.3103	29.9867	84	7012	8.78525	79.4184	2	1
65W36	SAT65	EL	2012-01-06	-31.3101	29.9865	84	7010	22.4934	94.3934	2	1
65W36	SAT65	EL	2012-01-06	-31.3101	29.9868	84	7011	26.1795	108.327	2	1
65W36	SAT65	EL	2012-01-06	-31.3103	29.9866	84	7013	50.9553	-51.5489	2	1
65W36	SAT65	EL	2012-01-06	-31.3106	29.9862	84	7014	90.8096	5.36791	2	1
65W36	SAT65	EL	2012-01-06	-31.3049	29.9841	84	7003	107.563	-64.3255	2	1
65W36	SAT65	EL	2012-01-06	-31.3142	29.9821	84	7018	117.059	141.995	2	1
65W36	SAT65	EL	2012-01-06	-31.311	29.9855	84	7015	126.736	-5.74647	2	1
65W36	SAT65	EL	2012-01-06	-31.3135	29.9833	84	7017	146.524	27.8464	2	1
65W36	SAT65	EL	2012-01-06	-31.3014	29.9831	84	7000	150.494	-999	2	1
65W36	SAT65	EL	2012-01-06	-31.3037	29.9842	84	7002	152.753	14.5398	2	1
65W36	SAT65	EL	2012-01-06	-31.3024	29.984	84	7001	158.777	28.1453	2	1
65W36	SAT65	EL	2012-01-06	-31.3104	29.9899	55	7007	182.807	70.343	2	1
65W36	SAT65	EL	2012-01-06	-31.3117	29.9865	84	7009	184.397	113.559	2	1
65W36	SAT65	EL	2012-01-06	-31.311	29.9883	55	7008	194.499	2.27469	2	1
65W36	SAT65	EL	2012-01-06	-31.3054	29.985	84	7004	223.882	6.66667	2	1
65W36	SAT65	EL	2012-01-06	-31.3084	29.9896	84	7006	243.801	47.2493	2	1
65W36	SAT65	EL	2012-01-06	-31.3117	29.9845	84	7016	258.917	-20.8204	2	1
65W36	SAT65	EL	2012-01-06	-31.3065	29.9868	84	7005	368.993	0.213106	2	1
65W37	SAT65	EL	2012-01-10	-31.2713	29.9927	17	7218	1.65328	-99.2932	2	1
65W37	SAT65	EL	2012-01-10	-31.2712	29.9925	17	7212	2.04498	180	2	1
65W37	SAT65	EL	2012-01-10	-31.2713	29.9926	17	7215	3.51322	-35.0424	2	1
65W37	SAT65	EL	2012-01-10	-31.2712	29.9925	17	7213	4.34094	156.13	2	1
65W37	SAT65	EL	2012-01-10	-31.2713	29.9925	17	7210	6.23777	-43.3025	2	1
65W37	SAT65	EL	2012-01-10	-31.2713	29.9926	17	7216	7.95225	-30.9517	2	1
65W37	SAT65	EL	2012-01-10	-31.2712	29.9927	17	7217	10.239	130.245	2	1
65W37	SAT65	EL	2012-01-10	-31.2712	29.9925	17	7214	10.4751	148.911	2	1
65W37	SAT65	EL	2012-01-10	-31.2713	29.9925	17	7211	12.0293	164.63	2	1
65W37	SAT65	EL	2012-01-10	-31.2707	29.9977	17	7204	42.2419	-71.0226	2	1
65W37	SAT65	EL	2012-01-10	-31.2709	29.9969	17	7203	88.8477	-54.0907	2	1
65W37	SAT65	EL	2012-01-11	-31.2713	29.9927	17	7219	89.133	35.7591	2	1
65W37	SAT65	EL	2012-01-10	-31.2704	29.9962	17	7202	94.073	37.4355	2	1
65W37	SAT65	EL	2012-01-10	-31.2704	29.9977	17	7205	98.6145	-123.837	2	1
65W37	SAT65	EL	2012-01-10	-31.2682	29.9985	17	7207	200.231	-141.899	2	1
65W37	SAT65	EL	2012-01-10	-31.2709	29.9885	17	7200	211.319	-999	2	1
65W37	SAT65	EL	2012-01-10	-31.2689	29.9967	17	7208	214.653	-13.183	2	1
65W37	SAT65	EL	2012-01-10	-31.27	29.995	17	7209	304.478	6.08033	2	1
65W37	SAT65	EL	2012-01-10	-31.2708	29.9969	17	7206	348.685	146.877	2	1
65W37	SAT65	EL	2012-01-10	-31.2702	29.9904	17	7201	596.399	26.4025	2	1
65W39	SAT65	EL	2012-01-19	-31.2708	30.0315	55	7613	2.69653	-139.338	2	1
65W39	SAT65	EL	2012-01-18	-31.2695	30.0295	33	7600	4.06601	-999	2	1
65W39	SAT65	EL	2012-01-18	-31.2695	30.0296	33	7601	4.34194	-144.072	2	1
65W39	SAT65	EL	2012-01-19	-31.2711	30.0269	33	7619	6.51676	-142.464	2	1
65W39	SAT65	EL	2012-01-19	-31.271	30.03	55	7606	8.13319	126.862	2	1
65W39	SAT65	EL	2012-01-19	-31.2707	30.0315	55	7612	10.107	156.757	2	1
65W39	SAT65	EL	2012-01-19	-31.2708	30.0314	55	7611	13.0951	143.259	2	1
65W39	SAT65	EL	2012-01-19	-31.271	30.0299	55	7605	13.1653	-153.442	2	1
65W39	SAT65	EL	2012-01-19	-31.2708	30.0316	55	7610	15.8753	152.518	2	1
65W39	SAT65	EL	2012-01-19	-31.271	30.03	55	7607	17.3671	108.839	2	1
65W39	SAT65	EL	2012-01-19	-31.2718	30.0297	55	7616	45.8394	-26.7659	2	1
65W39	SAT65	EL	2012-01-19	-31.271	30.0299	55	7608	46.4139	142.406	2	1
65W39	SAT65	EL	2012-01-18	-31.2706	30.0301	55	7604	49.6244	170.035	2	1
65W39	SAT65	EL	2012-01-18	-31.2711	30.0298	55	7603	59.3006	-147.2	2	1
65W39	SAT65	EL	2012-01-19	-31.272	30.0294	55	7617	110.983	134.097	2	1
65W39	SAT65	EL	2012-01-19	-31.2716	30.0308	55	7615	114.077	41.2787	2	1
65W39	SAT65	EL	2012-01-19	-31.2708	30.0315	55	7614	121.48	176.929	2	1
65W39	SAT65	EL	2012-01-19	-31.2708	30.0303	55	7609	136.148	28.6974	2	1
65W39	SAT65	EL	2012-01-18	-31.2695	30.0296	33	7602	192.7	-164.86	2	1
65W39	SAT65	EL	2012-01-19	-31.2711	30.0295	17	7618	261.792	-96.2034	2	1
65W4	SAT65	EL	2011-08-25	-31.3089	29.9872	84	601	0	-999	2	1
65W4	SAT65	EL	2011-08-25	-31.3095	29.9859	84	614	0	-999	2	1
65W4	SAT65	EL	2011-08-25	-31.3095	29.9859	84	615	2.04476	-999	2	1
65W4	SAT65	EL	2011-08-25	-31.3089	29.9871	84	600	2.60503	-999	2	1
65W4	SAT65	EL	2011-08-25	-31.3094	29.9858	84	613	14.4478	65.5889	2	1
65W4	SAT65	EL	2011-08-25	-31.3095	29.9855	84	611	16.618	176.643	2	1
65W4	SAT65	EL	2011-08-25	-31.3094	29.9857	84	612	16.618	8.20253e-05	2	1
65W4	SAT65	EL	2011-08-25	-31.3089	29.9872	84	602	17.4624	-999	2	1
65W4	SAT65	EL	2011-08-25	-31.3094	29.9858	84	610	32.5518	-64.5454	2	1
65W4	SAT65	EL	2011-08-25	-31.3027	29.9778	84	619	68.0099	116.774	2	1
65W4	SAT65	EL	2011-08-25	-31.3096	29.9878	84	604	88.9067	111.255	2	1
65W4	SAT65	EL	2011-08-25	-31.3089	29.9873	84	603	95.2108	32.1541	2	1
65W4	SAT65	EL	2011-08-25	-31.3101	29.9866	84	609	112.908	-178.102	2	1
65W4	SAT65	EL	2011-08-25	-31.3094	29.9859	84	616	159.393	-73.9237	2	1
65W4	SAT65	EL	2011-08-25	-31.3041	29.9779	84	618	162.519	45.8753	2	1
65W4	SAT65	EL	2011-08-25	-31.3098	29.9869	84	605	270.278	41.8986	2	1
65W4	SAT65	EL	2011-08-25	-31.304	29.9811	84	607	372.228	-29.2063	2	1
65W4	SAT65	EL	2011-08-25	-31.3085	29.9847	84	606	657.585	22.6005	2	1
65W4	SAT65	EL	2011-08-25	-31.3091	29.9844	84	617	910.313	25.6007	2	1
65W4	SAT65	EL	2011-08-25	-31.3027	29.9779	84	608	1266.07	-161.398	2	1
65W43	SAT65	EL	2012-02-04	-31.286	29.979	17	8415	2.62922	51.051	2	1
65W43	SAT65	EL	2012-02-04	-31.286	29.9789	17	8414	3.51228	-167.495	2	1
65W43	SAT65	EL	2012-02-04	-31.2856	29.9787	17	8410	8.22654	31.905	2	1
65W43	SAT65	EL	2012-02-04	-31.286	29.979	17	8413	8.88828	131.37	2	1
65W43	SAT65	EL	2012-02-04	-31.2853	29.9785	17	8402	12.028	24.2835	2	1
65W43	SAT65	EL	2012-02-04	-31.2855	29.9786	17	8409	14.8778	164.965	2	1
65W43	SAT65	EL	2012-02-04	-31.2859	29.9789	17	8412	17.1374	-8.48414	2	1
65W43	SAT65	EL	2012-02-04	-31.2852	29.9785	17	8403	17.4575	36.2807	2	1
65W43	SAT65	EL	2012-02-04	-31.2858	29.9785	17	8400	23.7345	-999	2	1
65W43	SAT65	EL	2012-02-04	-31.2857	29.9787	17	8411	31.3427	-56.9815	2	1
65W43	SAT65	EL	2012-02-04	-31.2851	29.9786	17	8404	36.9431	4.37675	2	1
65W43	SAT65	EL	2012-02-04	-31.2858	29.9787	17	8408	38.1703	163.475	2	1
65W43	SAT65	EL	2012-02-04	-31.2856	29.9786	17	8401	41.6975	-45.4608	2	1
65W43	SAT65	EL	2012-02-05	-31.2872	29.9788	17	8419	52.3599	164.025	2	1
65W43	SAT65	EL	2012-02-04	-31.2854	29.9786	17	8417	60.2423	-152.833	2	1
65W43	SAT65	EL	2012-02-04	-31.286	29.979	17	8416	81.3916	-171.56	2	1
65W43	SAT65	EL	2012-02-04	-31.2858	29.9789	17	8406	108.306	-175.561	2	1
65W43	SAT65	EL	2012-02-04	-31.2849	29.9788	17	8405	112.34	136.707	2	1
65W43	SAT65	EL	2012-02-04	-31.2849	29.9789	17	8407	114.419	-170.558	2	1
65W43	SAT65	EL	2012-02-04	-31.2859	29.9786	17	8418	149.505	-3.92143	2	1
65W44	SAT65	EL	2012-02-09	-31.2897	29.9531	32	8616	2.62879	-59.9946	2	1
65W44	SAT65	EL	2012-02-09	-31.2894	29.952	55	8612	3.97438	-100.39	2	1
65W44	SAT65	EL	2012-02-09	-31.2897	29.9531	32	8617	3.97446	-159.906	2	1
65W44	SAT65	EL	2012-02-08	-31.2915	29.9613	84	8601	6.91202	174.284	2	1
65W44	SAT65	EL	2012-02-09	-31.2894	29.952	55	8613	7.92605	18.3869	2	1
65W44	SAT65	EL	2012-02-09	-31.2895	29.9521	55	8614	8.74854	17.7285	2	1
65W44	SAT65	EL	2012-02-08	-31.2915	29.9613	84	8602	30.5067	-160.201	2	1
65W44	SAT65	EL	2012-02-08	-31.2858	29.9552	55	8607	62.2636	-21.2802	2	1
65W44	SAT65	EL	2012-02-09	-31.2896	29.9521	55	8615	102.879	-58.1282	2	1
65W44	SAT65	EL	2012-02-09	-31.2888	29.9527	55	8611	104.125	34.8844	2	1
65W44	SAT65	EL	2012-02-09	-31.2842	29.9532	55	8609	186.918	-139.824	2	1
65W44	SAT65	EL	2012-02-08	-31.2913	29.9613	84	8603	186.973	-42.5893	2	1
65W44	SAT65	EL	2012-02-08	-31.2862	29.9572	55	8606	221.702	-21.9667	2	1
65W44	SAT65	EL	2012-02-08	-31.2933	29.9622	36	8600	234.418	-999	2	1
65W44	SAT65	EL	2012-02-08	-31.2858	29.9546	55	8608	237.628	59.6124	2	1
65W44	SAT65	EL	2012-02-08	-31.2877	29.9595	84	8605	291.636	-45.046	2	1
65W44	SAT65	EL	2012-02-08	-31.2903	29.9598	84	8604	313.272	45.079	2	1
65W44	SAT65	EL	2012-02-09	-31.2858	29.9531	55	8610	367.084	2.21646	2	1
65W44	SAT65	EL	2012-02-09	-31.2897	29.9531	32	8618	376.267	-116.847	2	1
65W44	SAT65	EL	2012-02-09	-31.2914	29.9562	55	8619	576.09	-17.684	2	1
65W45	SAT65	EL	2012-02-13	-31.2281	29.9684	31	8815	1.75729	-134.485	2	1
65W45	SAT65	EL	2012-02-13	-31.2281	29.9684	31	8816	4.34101	113.88	2	1
65W45	SAT65	EL	2012-02-13	-31.2281	29.9684	31	8817	5.23373	115.445	2	1
65W45	SAT65	EL	2012-02-13	-31.231	29.965	31	8808	7.92972	100.02	2	1
65W45	SAT65	EL	2012-02-13	-31.2285	29.9596	31	8805	12.5308	29.3818	2	1
65W45	SAT65	EL	2012-02-13	-31.231	29.965	31	8809	13.1631	-81.3484	2	1
65W45	SAT65	EL	2012-02-13	-31.2284	29.9597	31	8806	14.1694	-9.58495	2	1
65W45	SAT65	EL	2012-02-13	-31.2291	29.9598	31	8804	76.1923	18.5737	2	1
65W45	SAT65	EL	2012-02-13	-31.226	29.9621	31	8800	100.339	-999	2	1
65W45	SAT65	EL	2012-02-13	-31.2274	29.9692	31	8814	118.019	-31.516	2	1
65W45	SAT65	EL	2012-02-13	-31.2311	29.9651	31	8810	234.062	-174.89	2	1
65W45	SAT65	EL	2012-02-13	-31.2312	29.9613	31	8803	291.968	99.1536	2	1
65W45	SAT65	EL	2012-02-13	-31.2295	29.9636	31	8802	309.658	63.3946	2	1
65W45	SAT65	EL	2012-02-13	-31.2266	29.9627	31	8801	357.725	22.6962	2	1
65W45	SAT65	EL	2012-02-13	-31.2273	29.974	31	8819	494.1	28.6078	2	1
65W45	SAT65	EL	2012-02-13	-31.2295	29.9637	31	8811	519.193	139.875	2	1
65W45	SAT65	EL	2012-02-13	-31.2281	29.9684	31	8818	591.564	120.522	2	1
65W45	SAT65	EL	2012-02-13	-31.2262	29.9748	31	8813	596.622	-154.374	2	1
65W45	SAT65	EL	2012-02-13	-31.2283	29.9597	31	8807	640.916	113.955	2	1
65W45	SAT65	EL	2012-02-13	-31.2306	29.9686	31	8812	829.843	-53.9357	2	1
65W7	SAT65	EL	2011-09-07	-31.3082	29.9743	36	1202	3.40794	113.86	2	1
65W7	SAT65	EL	2011-09-07	-31.3083	29.9742	36	1204	3.51121	-130.651	2	1
65W7	SAT65	EL	2011-09-07	-31.3082	29.9743	36	1201	4.33989	-2.68892	2	1
65W7	SAT65	EL	2011-09-07	-31.3072	29.9756	36	1219	5.32328	-8.64159	2	1
65W7	SAT65	EL	2011-09-07	-31.3082	29.9743	36	1203	7.92633	130.651	2	1
65W7	SAT65	EL	2011-09-07	-31.3116	29.9748	36	1215	11.2389	18.2151	2	1
65W7	SAT65	EL	2011-09-07	-31.3081	29.9744	36	1206	21.7275	-178.043	2	1
65W7	SAT65	EL	2011-09-07	-31.3083	29.9743	36	1205	23.6201	-68.7212	2	1
65W7	SAT65	EL	2011-09-07	-31.3084	29.9744	36	1200	23.7319	-999	2	1
65W7	SAT65	EL	2011-09-07	-31.3119	29.9743	36	1211	28.9813	30.6155	2	1
65W7	SAT65	EL	2011-09-07	-31.3082	29.9743	36	1207	56.1913	-24.9197	2	1
65W7	SAT65	EL	2011-09-07	-31.3122	29.9747	36	1214	65.0501	58.2487	2	1
65W7	SAT65	EL	2011-09-07	-31.3127	29.9754	36	1213	97.9358	-170.117	2	1
65W7	SAT65	EL	2011-09-07	-31.3095	29.973	36	1209	113.458	-30.0565	2	1
65W7	SAT65	EL	2011-09-07	-31.3122	29.9744	36	1212	124.452	-45.185	2	1
65W7	SAT65	EL	2011-09-07	-31.3104	29.9732	36	1217	127.366	18.543	2	1
65W7	SAT65	EL	2011-09-07	-31.3087	29.9743	36	1208	167.514	54.9516	2	1
65W7	SAT65	EL	2011-09-07	-31.3116	29.9748	36	1216	216.745	-77.6984	2	1
65W7	SAT65	EL	2011-09-07	-31.3104	29.9725	36	1210	258.169	-67.6359	2	1
65W7	SAT65	EL	2011-09-07	-31.3095	29.9726	36	1218	413.982	80.2537	2	1
71W10	AU071	EL	2008-11-10	29.98	-31.2861	84	918	0	-999	2	1
71W10	AU071	EL	2008-11-11	29.98	-31.2861	84	919	2.73221	-999	2	1
71W10	AU071	EL	2008-11-10	29.98	-31.2861	84	917	2.94238	171.795	2	1
71W10	AU071	EL	2008-11-10	29.9777	-31.2828	84	909	3.42594	-157.533	2	1
71W10	AU071	EL	2008-11-10	29.9777	-31.2828	84	906	4.51614	-49.3409	2	1
71W10	AU071	EL	2008-11-10	29.9777	-31.2828	84	910	5.67475	-90.001	2	1
71W10	AU071	EL	2008-11-10	29.9777	-31.2828	84	905	5.67475	135.083	2	1
71W10	AU071	EL	2008-11-10	29.9777	-31.2828	84	908	7.14978	133.528	2	1
71W10	AU071	EL	2008-11-10	29.9776	-31.2828	84	907	7.2328	163.347	2	1
71W10	AU071	EL	2008-11-10	29.9776	-31.2828	84	911	43.6824	-101.376	2	1
71W10	AU071	EL	2008-11-10	29.9794	-31.2861	84	916	68.5868	-74.4409	2	1
71W10	AU071	EL	2008-11-10	29.977	-31.2822	84	904	111.597	-84.2717	2	1
71W10	AU071	EL	2008-11-10	29.9787	-31.282	84	913	138.644	57.0729	2	1
71W10	AU071	EL	2008-11-10	29.9777	-31.2832	84	912	168.78	-131.647	2	1
71W10	AU071	EL	2008-11-10	29.978	-31.281	84	903	173.966	61.8147	2	1
71W10	AU071	EL	2008-11-10	29.9791	-31.2846	84	915	175.679	-24.6483	2	1
71W10	AU071	EL	2008-11-10	29.9749	-31.2745	84	900	250.018	-999	2	1
71W10	AU071	EL	2008-11-10	29.9745	-31.2766	84	901	304.132	-56.8297	2	1
71W10	AU071	EL	2008-11-10	29.98	-31.2821	84	914	313.2	103.247	2	1
71W10	AU071	EL	2008-11-10	29.9767	-31.2783	84	902	359.493	24.4786	2	1
71W11	AU071	EL	2008-11-12	29.9537	-31.2845	55	1006	4.38134	141.427	2	1
71W11	AU071	EL	2008-11-12	29.9537	-31.2844	55	1005	9.78694	155.16	2	1
71W11	AU071	EL	2008-11-12	29.953	-31.2858	55	1000	11.3126	-999	2	1
71W11	AU071	EL	2008-11-12	29.953	-31.2859	55	1001	14.0791	59.8973	2	1
71W11	AU071	EL	2008-11-13	29.9523	-31.2819	55	1014	14.2974	5.59553	2	1
71W11	AU071	EL	2008-11-13	29.9529	-31.2818	55	1016	19.7538	15.4629	2	1
71W11	AU071	EL	2008-11-13	29.9531	-31.2818	55	1017	32.3118	45.3812	2	1
71W11	AU071	EL	2008-11-12	29.9532	-31.2863	55	1003	41.656	144.826	2	1
71W11	AU071	EL	2008-11-12	29.9517	-31.2813	55	1012	44.1994	-63.3605	2	1
71W11	AU071	EL	2008-11-12	29.9521	-31.2815	55	1013	48.2444	35.2986	2	1
71W11	AU071	EL	2008-11-12	29.9528	-31.2859	55	1002	57.0997	-126.334	2	1
71W11	AU071	EL	2008-11-13	29.9523	-31.282	55	1015	61.4871	-82.9964	2	1
71W11	AU071	EL	2008-11-12	29.9517	-31.2808	55	1011	62.3913	-143.607	2	1
71W11	AU071	EL	2008-11-12	29.9537	-31.2844	55	1007	67.8908	-68.4007	2	1
71W11	AU071	EL	2008-11-12	29.9522	-31.2814	55	1010	85.7137	-39.5315	2	1
71W11	AU071	EL	2008-11-12	29.9531	-31.2846	55	1008	205.848	76.4845	2	1
71W11	AU071	EL	2008-11-12	29.9521	-31.2831	55	1009	207.304	33.6255	2	1
71W11	AU071	EL	2008-11-12	29.9528	-31.2861	55	1004	235.107	96.3486	2	1
71W11	AU071	EL	2008-11-13	29.9533	-31.282	55	1018	264.524	-74.3721	2	1
71W11	AU071	EL	2008-11-13	29.9556	-31.281	55	1019	348.303	12.001	2	1
71W2	AU071	EL	2008-10-10	29.9552	-31.2827	55	113	6.50468	100.182	2	1
71W2	AU071	EL	2008-10-10	29.9551	-31.2827	55	114	11.348	150.725	2	1
71W2	AU071	EL	2008-10-10	29.9549	-31.2831	55	117	15.4501	77.2785	2	1
71W2	AU071	EL	2008-10-10	29.9553	-31.2827	55	111	16.6194	73.8739	2	1
71W2	AU071	EL	2008-10-10	29.9552	-31.2826	55	112	17.3476	-151.447	2	1
71W2	AU071	EL	2008-10-10	29.9575	-31.2829	55	103	24.3116	-11.0204	2	1
71W2	AU071	EL	2008-10-10	29.958	-31.2838	55	106	26.9676	83.6868	2	1
71W2	AU071	EL	2008-10-10	29.9552	-31.2827	55	115	28.6136	126.506	2	1
71W2	AU071	EL	2008-10-10	29.9551	-31.2829	55	116	32.7969	0.530461	2	1
71W2	AU071	EL	2008-10-10	29.9574	-31.283	55	104	38.6828	18.1257	2	1
71W2	AU071	EL	2008-10-10	29.9578	-31.2826	55	102	42.9408	88.2793	2	1
71W2	AU071	EL	2008-10-10	29.9558	-31.2828	55	110	56.9143	-39.4278	2	1
71W2	AU071	EL	2008-10-10	29.9547	-31.2839	55	119	90.5976	-78.4848	2	1
71W2	AU071	EL	2008-10-10	29.9579	-31.284	55	107	92.1069	35.3742	2	1
71W2	AU071	EL	2008-10-10	29.9548	-31.283	55	118	101.943	-111.123	2	1
71W2	AU071	EL	2008-10-10	29.9572	-31.282	55	101	105.797	17.2667	2	1
71W2	AU071	EL	2008-10-10	29.9566	-31.2834	55	109	109.694	-18.7737	2	1
71W2	AU071	EL	2008-10-10	29.9571	-31.2832	55	105	117.799	-105.729	2	1
71W2	AU071	EL	2008-10-10	29.957	-31.2843	55	108	119.729	88.0165	2	1
71W2	AU071	EL	2008-10-10	29.9561	-31.2814	55	100	128.289	-999	2	1
71W3	AU071	EL	2008-10-12	29.9739	-31.2787	84	212	0	-999	2	1
71W3	AU071	EL	2008-10-12	29.9748	-31.278	84	208	7.14977	9.99854	2	1
71W3	AU071	EL	2008-10-12	29.9739	-31.2787	84	213	9.78824	-999	2	1
71W3	AU071	EL	2008-10-12	29.9748	-31.278	84	206	10.1625	-75.3916	2	1
71W3	AU071	EL	2008-10-12	29.9747	-31.2781	84	204	10.221	-34.6632	2	1
71W3	AU071	EL	2008-10-12	29.9746	-31.278	84	205	13.1331	76.5265	2	1
71W3	AU071	EL	2008-10-12	29.9747	-31.2779	84	207	15.6619	163.131	2	1
71W3	AU071	EL	2008-10-12	29.9739	-31.2786	84	214	16.8982	10.0282	2	1
71W3	AU071	EL	2008-10-12	29.9746	-31.2782	84	210	29.7354	130.075	2	1
71W3	AU071	EL	2008-10-13	29.9749	-31.2698	84	219	33.2438	-16.9731	2	1
71W3	AU071	EL	2008-10-12	29.9748	-31.2781	84	209	34.3003	77.665	2	1
71W3	AU071	EL	2008-10-12	29.9747	-31.2782	84	202	51.3008	28.0309	2	1
71W3	AU071	EL	2008-10-12	29.9745	-31.2785	84	203	55.2983	171.669	2	1
71W3	AU071	EL	2008-10-12	29.9745	-31.2705	84	218	95.378	12.7568	2	1
71W3	AU071	EL	2008-10-12	29.9746	-31.278	84	211	115.202	-145.723	2	1
71W3	AU071	EL	2008-10-12	29.974	-31.2723	84	217	226.668	10.9456	2	1
71W3	AU071	EL	2008-10-12	29.9746	-31.2758	84	201	279.344	-24.0798	2	1
71W3	AU071	EL	2008-10-12	29.9739	-31.2785	84	215	325.413	-12.0277	2	1
71W3	AU071	EL	2008-10-12	29.9738	-31.2758	84	216	414.517	4.72967	2	1
71W3	AU071	EL	2008-10-12	29.9764	-31.2722	84	200	476.132	-999	2	1
71W4	AU071	EL	2008-10-15	29.9616	-31.2574	6	319	0	-999	2	1
71W4	AU071	EL	2008-10-14	29.962	-31.2596	6	309	2.73282	-90.001	2	1
71W4	AU071	EL	2008-10-14	29.9623	-31.2592	6	302	2.73283	-49.3348	2	1
71W4	AU071	EL	2008-10-14	29.962	-31.2595	6	308	3.18105	137.226	2	1
71W4	AU071	EL	2008-10-15	29.9617	-31.2575	6	318	4.33367	105.744	2	1
71W4	AU071	EL	2008-10-14	29.962	-31.2596	6	307	4.33369	162.974	2	1
71W4	AU071	EL	2008-10-14	29.9623	-31.2592	6	303	5.46566	180	2	1
71W4	AU071	EL	2008-10-14	29.9626	-31.2595	6	311	8.71001	-127.445	2	1
71W4	AU071	EL	2008-10-14	29.9622	-31.2592	6	300	8.71001	-999	2	1
71W4	AU071	EL	2008-10-14	29.9621	-31.2595	6	306	13.1344	14.5309	2	1
71W4	AU071	EL	2008-10-14	29.9622	-31.2592	6	304	13.4932	-101.684	2	1
71W4	AU071	EL	2008-10-14	29.9622	-31.2591	6	301	17.42	-180	2	1
71W4	AU071	EL	2008-10-15	29.9614	-31.2575	6	315	19.4588	43.7447	2	1
71W4	AU071	EL	2008-10-15	29.9616	-31.2574	6	316	26.2694	0.000103894	2	1
71W4	AU071	EL	2008-10-15	29.9618	-31.2573	6	317	26.9716	151.681	2	1
71W4	AU071	EL	2008-10-14	29.9623	-31.2593	6	305	27.8154	56.9536	2	1
71W4	AU071	EL	2008-10-14	29.962	-31.2596	6	310	56.6378	-3.21954	2	1
71W4	AU071	EL	2008-10-14	29.9618	-31.2587	6	313	83.5891	-11.3245	2	1
71W4	AU071	EL	2008-10-14	29.9611	-31.2583	6	314	102.615	67.0512	2	1
71W4	AU071	EL	2008-10-14	29.9625	-31.2595	6	312	119.532	0.993146	2	1
71W6	AU071	EL	2008-10-20	29.9403	-31.2989	55	502	6.50305	77.6553	2	1
71W6	AU071	EL	2008-10-21	29.9403	-31.2987	55	504	7.14778	124.433	2	1
71W6	AU071	EL	2008-10-21	29.9404	-31.2988	55	505	7.14778	180	2	1
71W6	AU071	EL	2008-10-21	29.9324	-31.3006	55	517	8.70632	114.135	2	1
71W6	AU071	EL	2008-10-21	29.9403	-31.2987	55	506	11.8505	-84.3371	2	1
71W6	AU071	EL	2008-10-21	29.9324	-31.3005	55	518	13.2502	-28.7585	2	1
71W6	AU071	EL	2008-10-20	29.9402	-31.2989	55	503	15.7711	93.8258	2	1
71W6	AU071	EL	2008-10-21	29.9404	-31.2982	55	508	27.239	98.9811	2	1
71W6	AU071	EL	2008-10-21	29.9398	-31.2981	55	510	34.2794	-58.3658	2	1
71W6	AU071	EL	2008-10-21	29.9344	-31.3005	55	514	34.9609	62.4354	2	1
71W6	AU071	EL	2008-10-21	29.9327	-31.3007	55	516	35.2772	30.9025	2	1
71W6	AU071	EL	2008-10-21	29.9396	-31.2983	55	511	56.1097	91.4802	2	1
71W6	AU071	EL	2008-10-21	29.9402	-31.2988	55	507	67.2989	118.873	2	1
71W6	AU071	EL	2008-10-21	29.9325	-31.3004	55	519	76.8324	14.2225	2	1
71W6	AU071	EL	2008-10-21	29.9406	-31.2983	55	509	82.272	175.177	2	1
71W6	AU071	EL	2008-10-20	29.9411	-31.2981	55	501	131.893	15.2082	2	1
71W6	AU071	EL	2008-10-20	29.9417	-31.297	55	500	139.317	-999	2	1
71W6	AU071	EL	2008-10-21	29.9341	-31.3004	55	515	145.739	-42.3436	2	1
71W6	AU071	EL	2008-10-21	29.9365	-31.2993	55	513	267.076	-5.29942	2	1
71W6	AU071	EL	2008-10-21	29.9392	-31.2979	55	512	323.153	-78.5266	2	1
71W7	AU071	EL	2008-10-23	29.9396	-31.2967	55	614	3.18041	-71.5051	2	1
71W7	AU071	EL	2008-10-23	29.9413	-31.2893	55	601	6.60563	-132.647	2	1
71W7	AU071	EL	2008-10-23	29.9432	-31.2916	55	609	11.3115	-64.7899	2	1
71W7	AU071	EL	2008-10-23	29.9414	-31.2894	55	600	19.139	-999	2	1
71W7	AU071	EL	2008-10-23	29.9433	-31.2915	55	608	19.9356	-74.1997	2	1
71W7	AU071	EL	2008-10-23	29.9398	-31.2967	55	613	20.8241	45.8413	2	1
71W7	AU071	EL	2008-10-23	29.9427	-31.2972	55	618	36.5142	-89.9639	2	1
71W7	AU071	EL	2008-10-23	29.9413	-31.2893	55	602	40.5152	-168.028	2	1
71W7	AU071	EL	2008-10-23	29.9412	-31.2884	55	604	47.2053	-40.5818	2	1
71W7	AU071	EL	2008-10-23	29.9437	-31.2916	55	607	50.6315	137.393	2	1
71W7	AU071	EL	2008-10-23	29.9424	-31.297	55	619	61.5448	35.1157	2	1
71W7	AU071	EL	2008-10-23	29.9432	-31.2917	55	610	62.7027	56.7811	2	1
71W7	AU071	EL	2008-10-23	29.9409	-31.2881	55	605	73.627	146.31	2	1
71W7	AU071	EL	2008-10-23	29.9414	-31.289	55	603	76.6567	-22.5548	2	1
71W7	AU071	EL	2008-10-23	29.9401	-31.296	55	612	91.1991	-6.44052	2	1
71W7	AU071	EL	2008-10-23	29.9408	-31.2979	55	616	102.153	-31.9994	2	1
71W7	AU071	EL	2008-10-23	29.9418	-31.2982	55	617	143.553	-65.8474	2	1
71W7	AU071	EL	2008-10-23	29.9396	-31.2968	55	615	193.827	-43.1518	2	1
71W7	AU071	EL	2008-10-23	29.9416	-31.2882	55	606	467.15	56.3518	2	1
71W7	AU071	EL	2008-10-23	29.9429	-31.2922	55	611	546.735	5.42366	2	1
71W8	AU071	EL	2008-11-06	29.9704	-31.2516	6	702	5.6767	130.667	2	1
71W8	AU071	EL	2008-11-06	29.9704	-31.2516	6	701	8.71086	26.6529	2	1
71W8	AU071	EL	2008-11-06	29.9699	-31.2495	6	707	47.6129	177.02	2	1
71W8	AU071	EL	2008-11-06	29.9715	-31.2552	6	714	58.4092	8.61928	2	1
71W8	AU071	EL	2008-11-06	29.9711	-31.2548	6	713	64.9837	-93.3827	2	1
71W8	AU071	EL	2008-11-06	29.9703	-31.2537	6	710	82.0509	-30.3266	2	1
71W8	AU071	EL	2008-11-06	29.9704	-31.2516	6	703	84.3275	-76.4448	2	1
71W8	AU071	EL	2008-11-06	29.9696	-31.2513	6	700	85.678	-999	2	1
71W8	AU071	EL	2008-11-06	29.966	-31.2585	6	719	94.7716	25.7957	2	1
71W8	AU071	EL	2008-11-06	29.9711	-31.2537	6	711	112.832	21.2265	2	1
71W8	AU071	EL	2008-11-06	29.9702	-31.2523	6	704	113.09	62.9299	2	1
71W8	AU071	EL	2008-11-06	29.972	-31.2541	6	712	124.428	116.731	2	1
71W8	AU071	EL	2008-11-06	29.9691	-31.2503	6	706	131.14	44.692	2	1
71W8	AU071	EL	2008-11-06	29.9692	-31.253	6	709	137.99	-62.2559	2	1
71W8	AU071	EL	2008-11-06	29.9718	-31.2556	6	715	150.329	152.387	2	1
71W8	AU071	EL	2008-11-06	29.9678	-31.2546	6	717	203.074	-70.2275	2	1
71W8	AU071	EL	2008-11-06	29.9691	-31.2525	6	705	263.125	102.279	2	1
71W8	AU071	EL	2008-11-06	29.9705	-31.2549	6	716	283.376	-20.8572	2	1
71W8	AU071	EL	2008-11-06	29.9669	-31.256	6	718	310.161	-11.6417	2	1
71W8	AU071	EL	2008-11-06	29.9696	-31.2498	6	708	384.046	-33.2738	2	1
72W10	AU072	EL	2008-10-28	29.939	-31.2779	2	900	0	-999	2	1
72W10	AU072	EL	2008-10-29	29.9454	-31.282	55	914	2.73178	-174.191	2	1
72W10	AU072	EL	2008-10-29	29.9461	-31.282	55	912	2.73179	-26.6662	2	1
72W10	AU072	EL	2008-10-29	29.9455	-31.282	55	915	4.38126	128.574	2	1
72W10	AU072	EL	2008-10-28	29.939	-31.2779	2	901	5.67376	-999	2	1
72W10	AU072	EL	2008-10-28	29.939	-31.2779	2	902	5.67376	-180	2	1
72W10	AU072	EL	2008-10-29	29.9454	-31.2821	55	916	61.2183	80.3452	2	1
72W10	AU072	EL	2008-10-28	29.9488	-31.2857	55	906	62.4466	-11.7197	2	1
72W10	AU072	EL	2008-10-29	29.9461	-31.282	55	913	65.2676	-5.80918	2	1
72W10	AU072	EL	2008-10-28	29.9492	-31.2861	55	907	104.139	-65.9327	2	1
72W10	AU072	EL	2008-10-28	29.9515	-31.2849	55	909	120.727	-131.263	2	1
72W10	AU072	EL	2008-10-28	29.9502	-31.2858	55	908	171.429	-19.2622	2	1
72W10	AU072	EL	2008-10-28	29.9477	-31.2827	55	911	183.178	-15.712	2	1
72W10	AU072	EL	2008-10-28	29.939	-31.2779	2	903	233.44	-156.792	2	1
72W10	AU072	EL	2008-10-29	29.9406	-31.273	55	918	300.143	-144.017	2	1
72W10	AU072	EL	2008-10-28	29.947	-31.2831	55	905	363.597	18.2875	2	1
72W10	AU072	EL	2008-10-28	29.9503	-31.2848	55	910	370.636	31.392	2	1
72W10	AU072	EL	2008-10-29	29.9399	-31.2754	2	919	420.44	50.9776	2	1
72W10	AU072	EL	2008-10-28	29.941	-31.2787	2	904	813.47	17.6744	2	1
72W10	AU072	EL	2008-10-29	29.9449	-31.2818	2	917	1152.26	38.1626	2	1
72W11	AU072	EL	2008-10-30	29.9467	-31.2824	55	1004	0	-999	2	1
72W11	AU072	EL	2008-10-31	29.9418	-31.2785	55	1011	3.42522	-137.894	2	1
72W11	AU072	EL	2008-10-30	29.9467	-31.2824	55	1005	4.51529	-999	2	1
72W11	AU072	EL	2008-10-30	29.9467	-31.2825	55	1006	6.50445	20.0664	2	1
72W11	AU072	EL	2008-10-31	29.9418	-31.2785	55	1012	10.8568	-127.478	2	1
72W11	AU072	EL	2008-10-31	29.9301	-31.281	2	1019	24.4838	164.462	2	1
72W11	AU072	EL	2008-10-30	29.9467	-31.2829	55	1003	59.4798	-43.6928	2	1
72W11	AU072	EL	2008-10-30	29.9466	-31.2825	55	1007	123.52	-29.1253	2	1
72W11	AU072	EL	2008-10-31	29.9386	-31.2758	2	1015	143.627	-0.494131	2	1
72W11	AU072	EL	2008-10-31	29.9397	-31.2767	2	1014	156.463	0.791336	2	1
72W11	AU072	EL	2008-10-31	29.93	-31.2795	55	1018	177.922	-73.5135	2	1
72W11	AU072	EL	2008-10-31	29.9451	-31.281	2	1009	200.363	-38.0993	2	1
72W11	AU072	EL	2008-10-30	29.9433	-31.2834	55	1001	241.399	22.5706	2	1
72W11	AU072	EL	2008-10-30	29.9452	-31.2846	55	1002	251.003	-85.727	2	1
72W11	AU072	EL	2008-10-31	29.9435	-31.2801	2	1010	252.603	14.057	2	1
72W11	AU072	EL	2008-10-31	29.946	-31.2834	55	1008	300.842	130.333	2	1
72W11	AU072	EL	2008-10-31	29.9419	-31.2785	55	1013	312.875	-99.4724	2	1
72W11	AU072	EL	2008-10-31	29.9376	-31.275	55	1016	413.125	-98.3374	2	1
72W11	AU072	EL	2008-10-31	29.9353	-31.2778	2	1017	586.431	33.9595	2	1
72W11	AU072	EL	2008-10-30	29.9376	-31.2825	2	1000	598.869	-999	2	1
72W13	AU072	EL	2008-11-04	29.9612	-31.2324	6	1203	0	-999	2	1
72W13	AU072	EL	2008-11-04	29.9612	-31.2324	6	1204	0	-999	2	1
72W13	AU072	EL	2008-11-04	29.9667	-31.24	6	1212	0	-999	2	1
72W13	AU072	EL	2008-11-04	29.9607	-31.2325	6	1202	54.5092	71.1426	2	1
72W13	AU072	EL	2008-11-04	29.9664	-31.2405	6	1211	65.2622	-84.3502	2	1
72W13	AU072	EL	2008-11-04	29.9602	-31.2392	6	1200	90.9815	-999	2	1
72W13	AU072	EL	2008-11-04	29.9651	-31.2398	6	1214	101.139	13.9078	2	1
72W13	AU072	EL	2008-11-04	29.9645	-31.2342	6	1207	131.252	-11.1885	2	1
72W13	AU072	EL	2008-11-04	29.965	-31.2399	6	1210	159.713	-115.301	2	1
72W13	AU072	EL	2008-11-04	29.9707	-31.253	6	1218	161.21	-92.0704	2	1
72W13	AU072	EL	2008-11-04	29.9667	-31.24	6	1213	168.62	-999	2	1
72W13	AU072	EL	2008-11-04	29.9629	-31.2337	6	1206	174.187	-20.191	2	1
72W13	AU072	EL	2008-11-04	29.9612	-31.2324	6	1205	239.881	-999	2	1
72W13	AU072	EL	2008-11-04	29.9691	-31.2468	6	1216	311.011	36.5555	2	1
72W13	AU072	EL	2008-11-04	29.9721	-31.2524	6	1219	421.748	49.1472	2	1
72W13	AU072	EL	2008-11-04	29.9682	-31.2377	6	1209	422.161	82.5001	2	1
72W13	AU072	EL	2008-11-04	29.9658	-31.2343	6	1208	474.353	49.7165	2	1
72W13	AU072	EL	2008-11-04	29.9688	-31.2494	6	1217	480.792	-31.4218	2	1
72W13	AU072	EL	2008-11-04	29.9596	-31.2386	85	1201	744.514	49.1819	2	1
72W13	AU072	EL	2008-11-04	29.9642	-31.2395	6	1215	1018.43	-142.68	2	1
72W15	AU072	EL	2008-11-08	29.9976	-31.2745	3	1407	4.3342	132.77	2	1
72W15	AU072	EL	2008-11-08	29.9975	-31.2746	3	1405	7.15084	-97.2201	2	1
72W15	AU072	EL	2008-11-08	29.9975	-31.2745	3	1406	8.40893	112.468	2	1
72W15	AU072	EL	2008-11-08	29.9975	-31.2745	3	1408	8.5757	-3.17409	2	1
72W15	AU072	EL	2008-11-08	29.9969	-31.2741	3	1414	16.6239	-99.4621	2	1
72W15	AU072	EL	2008-11-08	29.997	-31.2743	3	1415	54.4723	24.4475	2	1
72W15	AU072	EL	2008-11-08	29.9966	-31.2748	3	1404	99.5771	118.391	2	1
72W15	AU072	EL	2008-11-08	29.9974	-31.2755	3	1403	122.759	-30.3528	2	1
72W15	AU072	EL	2008-11-08	29.9993	-31.2754	3	1410	168.651	-51.639	2	1
72W15	AU072	EL	2008-11-08	29.9988	-31.2731	3	1412	192.874	174.149	2	1
72W15	AU072	EL	2008-11-08	29.9975	-31.2746	3	1409	207.749	-103.303	2	1
72W15	AU072	EL	2008-11-08	29.9965	-31.2766	3	1401	232.088	122.113	2	1
72W15	AU072	EL	2008-11-08	30.0056	-31.2749	3	1419	259.849	-40.5337	2	1
72W15	AU072	EL	2008-11-08	30.0008	-31.2748	3	1411	279.22	-109.703	2	1
72W15	AU072	EL	2008-11-08	29.9981	-31.278	3	1402	307.302	-148.411	2	1
72W15	AU072	EL	2008-11-08	29.9958	-31.2792	3	1400	313.735	-999	2	1
72W15	AU072	EL	2008-11-08	29.9981	-31.272	84	1417	334.533	62.9533	2	1
72W15	AU072	EL	2008-11-08	30.0003	-31.2741	3	1413	347.293	140.9	2	1
72W15	AU072	EL	2008-11-08	29.9968	-31.2747	3	1416	347.301	-173.018	2	1
72W15	AU072	EL	2008-11-08	30.0013	-31.2718	3	1418	586.715	45.6181	2	1
72W16	AU072	EL	2008-11-10	30.0006	-31.2794	3	1514	13.4959	-102.913	2	1
72W16	AU072	EL	2008-11-10	30.0024	-31.2822	3	1506	19.8249	177.169	2	1
72W16	AU072	EL	2008-11-10	30.0025	-31.2821	3	1507	62.4686	-76.7537	2	1
72W16	AU072	EL	2008-11-10	30.0013	-31.2809	3	1516	93.0986	80.0879	2	1
72W16	AU072	EL	2008-11-10	30.0032	-31.2813	3	1505	135.803	56.6149	2	1
72W16	AU072	EL	2008-11-10	29.9979	-31.2827	3	1518	159.574	-76.8421	2	1
72W16	AU072	EL	2008-11-10	30.0021	-31.2817	3	1508	176.708	152.144	2	1
72W16	AU072	EL	2008-11-10	30.0006	-31.2795	3	1515	180.799	-33.6685	2	1
72W16	AU072	EL	2008-11-10	30.0068	-31.2792	3	1511	180.99	-173.634	2	1
72W16	AU072	EL	2008-11-10	30.0023	-31.28	3	1513	189.345	33.006	2	1
72W16	AU072	EL	2008-11-10	29.9924	-31.2787	3	1500	227.126	-999	2	1
72W16	AU072	EL	2008-11-10	30.0044	-31.2801	3	1510	263.231	48.8955	2	1
72W16	AU072	EL	2008-11-10	30.0037	-31.2822	3	1509	264.327	-92.8027	2	1
72W16	AU072	EL	2008-11-10	30.0051	-31.2797	3	1512	291.13	9.54575	2	1
72W16	AU072	EL	2008-11-10	30.0005	-31.2813	3	1517	318.629	0.151017	2	1
72W16	AU072	EL	2008-11-10	29.9944	-31.2795	3	1501	340.521	-64.3328	2	1
72W16	AU072	EL	2008-11-10	29.9984	-31.2839	3	1519	395.286	93.1842	2	1
72W16	AU072	EL	2008-11-10	30.0003	-31.2739	3	1503	458.482	125.414	2	1
72W16	AU072	EL	2008-11-10	30.0016	-31.2775	3	1504	488.396	-2.02808	2	1
72W16	AU072	EL	2008-11-10	29.9969	-31.2777	3	1502	576.347	-13.4184	2	1
72W19	AU072	EL	2008-11-16	29.9327	-31.2969	55	1814	3.18028	-58.8754	2	1
72W19	AU072	EL	2008-11-16	29.9329	-31.2969	55	1811	3.18028	-155.184	2	1
72W19	AU072	EL	2008-11-16	29.9273	-31.3004	55	1805	6.60494	94.7394	2	1
72W19	AU072	EL	2008-11-16	29.9328	-31.2968	55	1813	6.62606	-56.2631	2	1
72W19	AU072	EL	2008-11-16	29.9329	-31.2969	55	1810	7.0076	-17.0305	2	1
72W19	AU072	EL	2008-11-16	29.9327	-31.2969	55	1815	11.3107	-149.901	2	1
72W19	AU072	EL	2008-11-16	29.9329	-31.2969	55	1812	15.5481	115.138	2	1
72W19	AU072	EL	2008-11-16	29.9328	-31.2968	55	1816	20.8231	-138.594	2	1
72W19	AU072	EL	2008-11-16	29.9334	-31.2974	55	1818	45.4921	-56.638	2	1
72W19	AU072	EL	2008-11-16	29.9326	-31.2969	55	1817	107.373	-125.986	2	1
72W19	AU072	EL	2008-11-16	29.9366	-31.2981	55	1800	121.575	-999	2	1
72W19	AU072	EL	2008-11-16	29.9273	-31.3004	55	1806	145.548	63.1195	2	1
72W19	AU072	EL	2008-11-16	29.9331	-31.2983	55	1809	165.925	-61.1748	2	1
72W19	AU072	EL	2008-11-16	29.9363	-31.2972	55	1801	201.194	-113.016	2	1
72W19	AU072	EL	2008-11-16	29.9316	-31.2993	55	1808	203.874	-24.7793	2	1
72W19	AU072	EL	2008-11-16	29.9348	-31.2983	55	1802	245.203	15.7414	2	1
72W19	AU072	EL	2008-11-16	29.9327	-31.2992	55	1803	268.955	-0.646537	2	1
72W19	AU072	EL	2008-11-16	29.9338	-31.2972	55	1819	314.625	159.986	2	1
72W19	AU072	EL	2008-11-16	29.9304	-31.3002	55	1804	319.766	22.135	2	1
72W19	AU072	EL	2008-11-16	29.9285	-31.2998	55	1807	319.799	15.0509	2	1
72W20	AU072	EL	2008-11-18	30.0027	-31.2708	3	1917	0	-999	2	1
72W20	AU072	EL	2008-11-18	30.0027	-31.2708	3	1918	3.42653	-999	2	1
72W20	AU072	EL	2008-11-18	30.0027	-31.2708	3	1916	4.51717	180	2	1
72W20	AU072	EL	2008-11-18	30.0015	-31.2699	3	1909	6.50744	38.2585	2	1
72W20	AU072	EL	2008-11-18	30.0015	-31.2699	3	1911	6.60827	139.338	2	1
72W20	AU072	EL	2008-11-18	30.0015	-31.2699	3	1908	7.15122	89.6945	2	1
72W20	AU072	EL	2008-11-18	30.0016	-31.2699	84	1910	12.9062	159.934	2	1
72W20	AU072	EL	2008-11-18	30.0015	-31.2699	84	1912	21.5566	-127.816	2	1
72W20	AU072	EL	2008-11-18	30.008	-31.2721	84	1906	45.6828	-103.816	2	1
72W20	AU072	EL	2008-11-18	30.0079	-31.2726	84	1905	59.2597	93.4352	2	1
72W20	AU072	EL	2008-11-18	30.0033	-31.2702	3	1915	90.989	116.439	2	1
72W20	AU072	EL	2008-11-18	30.0013	-31.27	84	1913	96.0799	-142.185	2	1
72W20	AU072	EL	2008-11-18	30.0023	-31.27	3	1914	107.577	14.2247	2	1
72W20	AU072	EL	2008-11-18	30.0041	-31.2723	3	1902	146.746	164.969	2	1
72W20	AU072	EL	2008-11-19	30.0027	-31.2708	3	1919	149.825	87.5643	2	1
72W20	AU072	EL	2008-11-18	30.0055	-31.2726	3	1901	151.944	-161.475	2	1
72W20	AU072	EL	2008-11-18	30.0097	-31.2726	84	1904	183.661	176.851	2	1
72W20	AU072	EL	2008-11-18	30.0055	-31.2723	3	1903	433.839	5.21322	2	1
72W20	AU072	EL	2008-11-18	30.0076	-31.2721	84	1907	679.714	31.0888	2	1
72W20	AU072	EL	2008-11-18	29.9977	-31.273	3	1900	811.745	-999	2	1
72W22	AU072	EL	2008-11-22	29.966	-31.2522	6	2100	0	-999	2	1
72W22	AU072	EL	2008-11-22	29.966	-31.2522	6	2101	0	-999	2	1
72W22	AU072	EL	2008-11-22	29.966	-31.2522	6	2102	0	-999	2	1
72W22	AU072	EL	2008-11-22	29.966	-31.2522	6	2103	2.94337	-999	2	1
72W22	AU072	EL	2008-11-23	29.9654	-31.2515	6	2112	2.94339	108.836	2	1
72W22	AU072	EL	2008-11-22	29.9659	-31.2511	6	2107	2.94341	-75.8311	2	1
72W22	AU072	EL	2008-11-23	29.9654	-31.2515	6	2113	6.36233	-89.999	2	1
72W22	AU072	EL	2008-11-23	29.9654	-31.2514	6	2114	6.36233	180	2	1
72W22	AU072	EL	2008-11-23	29.9655	-31.2516	6	2111	17.5814	79.5941	2	1
72W22	AU072	EL	2008-11-23	29.9723	-31.2431	6	2118	19.1493	-80.3037	2	1
72W22	AU072	EL	2008-11-22	29.9661	-31.2513	6	2109	23.1641	24.7069	2	1
72W22	AU072	EL	2008-11-22	29.966	-31.2511	6	2108	26.9726	58.5181	2	1
72W22	AU072	EL	2008-11-22	29.9657	-31.2511	6	2105	50.4324	25.9755	2	1
72W22	AU072	EL	2008-11-22	29.9658	-31.2507	6	2106	57.5434	153.066	2	1
72W22	AU072	EL	2008-11-22	29.9661	-31.2515	6	2110	68.4376	88.3451	2	1
72W22	AU072	EL	2008-11-23	29.9654	-31.2515	6	2115	105.622	-55.8988	2	1
72W22	AU072	EL	2008-11-22	29.966	-31.2522	6	2104	135.23	76.7895	2	1
72W22	AU072	EL	2008-11-23	29.9721	-31.243	6	2119	190.993	58.411	2	1
72W22	AU072	EL	2008-11-23	29.9663	-31.252	6	2116	491.589	-98.5895	2	1
72W22	AU072	EL	2008-11-23	29.9683	-31.2483	6	2117	747.912	7.42579	2	1
72W25	AU072	EL	2008-11-29	29.9372	-31.2945	55	2402	0	-999	2	1
72W25	AU072	EL	2008-11-29	29.9338	-31.302	55	2409	0	-999	2	1
72W25	AU072	EL	2008-11-29	29.9338	-31.302	55	2410	0	-999	2	1
72W25	AU072	EL	2008-11-29	29.9275	-31.3004	55	2418	2.73085	79.8265	2	1
72W25	AU072	EL	2008-11-29	29.9339	-31.3021	55	2408	6.50259	83.8771	2	1
72W25	AU072	EL	2008-11-29	29.9275	-31.3004	55	2419	9.07383	157.825	2	1
72W25	AU072	EL	2008-11-29	29.9276	-31.3005	55	2413	15.6364	67.8522	2	1
72W25	AU072	EL	2008-11-29	29.9275	-31.3002	55	2417	16.6519	-82.3429	2	1
72W25	AU072	EL	2008-11-29	29.9348	-31.3002	55	2405	21.605	171.643	2	1
72W25	AU072	EL	2008-11-29	29.935	-31.3001	55	2406	51.5652	60.2857	2	1
72W25	AU072	EL	2008-11-29	29.9287	-31.2996	55	2412	156.428	-72.3262	2	1
72W25	AU072	EL	2008-11-29	29.9274	-31.3005	55	2414	189.008	95.5682	2	1
72W25	AU072	EL	2008-11-29	29.9364	-31.299	55	2404	220.426	40.6678	2	1
72W25	AU072	EL	2008-11-29	29.9355	-31.3002	55	2407	282.125	114.463	2	1
72W25	AU072	EL	2008-11-29	29.9389	-31.2925	55	2401	299.487	-11.7811	2	1
72W25	AU072	EL	2008-11-29	29.9412	-31.2907	55	2400	325.494	-999	2	1
72W25	AU072	EL	2008-11-29	29.9283	-31.2991	55	2415	392.525	83.5886	2	1
72W25	AU072	EL	2008-11-29	29.9318	-31.3004	55	2416	445.985	159.358	2	1
72W25	AU072	EL	2008-11-29	29.9372	-31.2945	55	2403	544.466	-999	2	1
72W25	AU072	EL	2008-11-29	29.9338	-31.302	55	2411	606.515	-999	2	1
72W27	AU072	EL	2008-12-03	29.9345	-31.2833	2	2615	0	-999	2	1
72W27	AU072	EL	2008-12-03	29.9356	-31.2781	2	2602	4.19253	119.581	2	1
72W27	AU072	EL	2008-12-03	29.9356	-31.2782	2	2603	4.1926	-98.6801	2	1
72W27	AU072	EL	2008-12-03	29.9345	-31.2833	2	2616	22.4828	-999	2	1
72W27	AU072	EL	2008-12-03	29.9346	-31.2835	2	2614	26.5625	-169.132	2	1
72W27	AU072	EL	2008-12-03	29.9344	-31.283	2	2613	58.2567	-3.85683	2	1
72W27	AU072	EL	2008-12-03	29.9334	-31.2778	55	2611	61.2144	-85.1765	2	1
72W27	AU072	EL	2008-12-03	29.9403	-31.2845	55	2619	93.5134	-109.849	2	1
72W27	AU072	EL	2008-12-03	29.9352	-31.2791	2	2601	125.559	162.977	2	1
72W27	AU072	EL	2008-12-03	29.9357	-31.2781	2	2604	133.178	13.0749	2	1
72W27	AU072	EL	2008-12-03	29.9346	-31.2781	2	2610	137.765	45.893	2	1
72W27	AU072	EL	2008-12-03	29.9361	-31.2775	2	2609	170.074	11.4132	2	1
72W27	AU072	EL	2008-12-03	29.9367	-31.2775	2	2605	180.641	124.466	2	1
72W27	AU072	EL	2008-12-03	29.9361	-31.276	55	2607	246.011	97.7522	2	1
72W27	AU072	EL	2008-12-03	29.9348	-31.2833	2	2617	251.468	-9.01079	2	1
72W27	AU072	EL	2008-12-03	29.9385	-31.2759	2	2608	310.918	145.274	2	1
72W27	AU072	EL	2008-12-03	29.9367	-31.279	2	2606	361.177	170.968	2	1
72W27	AU072	EL	2008-12-03	29.9372	-31.2829	2	2618	378.804	39.22	2	1
72W27	AU072	EL	2008-12-03	29.9383	-31.2755	2	2600	537.311	-999	2	1
72W27	AU072	EL	2008-12-03	29.9331	-31.2782	55	2612	593.343	-37.2369	2	1
72W29	AU072	EL	2008-12-11	29.9499	-31.2899	55	3014	4.19259	139.343	2	1
72W29	AU072	EL	2008-12-11	29.9499	-31.2898	55	3013	9.78662	-89.999	2	1
72W29	AU072	EL	2008-12-11	29.95	-31.2898	55	3012	11.3466	-143.151	2	1
72W29	AU072	EL	2008-12-11	29.9511	-31.2883	55	3018	27.2441	47.9322	2	1
72W29	AU072	EL	2008-12-11	29.9497	-31.2903	55	3010	35.6797	86.1942	2	1
72W29	AU072	EL	2008-12-11	29.9503	-31.289	55	3016	45.6571	74.4349	2	1
72W29	AU072	EL	2008-12-11	29.9496	-31.2901	55	3011	49.3654	76.3895	2	1
72W29	AU072	EL	2008-12-11	29.9507	-31.2891	55	3017	101.957	-77.3038	2	1
72W29	AU072	EL	2008-12-11	29.9513	-31.2882	55	3019	102.022	-9.9857	2	1
72W29	AU072	EL	2008-12-11	29.9498	-31.2899	55	3015	111.581	64.5401	2	1
72W29	AU072	EL	2008-12-11	29.957	-31.2801	55	3001	139.257	-1.15668	2	1
72W29	AU072	EL	2008-12-11	29.9561	-31.281	55	3002	159.854	150.265	2	1
72W29	AU072	EL	2008-12-11	29.9582	-31.2788	55	3000	193.05	-999	2	1
72W29	AU072	EL	2008-12-11	29.9605	-31.2859	84	3007	210.304	130.009	2	1
72W29	AU072	EL	2008-12-11	29.9564	-31.2796	55	3003	231.501	89.8458	2	1
72W29	AU072	EL	2008-12-11	29.9586	-31.2799	55	3004	322.801	-24.9242	2	1
72W29	AU072	EL	2008-12-11	29.9591	-31.2846	84	3008	356.397	-129.199	2	1
72W29	AU072	EL	2008-12-11	29.9616	-31.2792	84	3005	392.441	117.545	2	1
72W29	AU072	EL	2008-12-11	29.9608	-31.2824	84	3006	418.557	-6.97862	2	1
72W29	AU072	EL	2008-12-11	29.9587	-31.2876	84	3009	987.571	65.1153	2	1
72W30	AU072	EL	2008-12-13	29.9682	-31.2747	84	3111	0	-999	2	1
72W30	AU072	EL	2008-12-13	29.9676	-31.2765	84	3118	0	-999	2	1
72W30	AU072	EL	2008-12-13	29.9713	-31.2737	84	3105	4.38216	74.3065	2	1
72W30	AU072	EL	2008-12-13	29.9713	-31.2736	84	3106	6.45006	-160.659	2	1
72W30	AU072	EL	2008-12-13	29.9673	-31.2766	84	3116	11.1395	-26.3547	2	1
72W30	AU072	EL	2008-12-13	29.9711	-31.2739	84	3108	19.4568	31.1665	2	1
72W30	AU072	EL	2008-12-13	29.9675	-31.2766	84	3117	19.6378	-29.8955	2	1
72W30	AU072	EL	2008-12-13	29.9672	-31.2765	84	3115	22.0483	-95.9338	2	1
72W30	AU072	EL	2008-12-13	29.9714	-31.2738	84	3104	24.1153	148.237	2	1
72W30	AU072	EL	2008-12-13	29.9712	-31.2737	84	3107	29.8307	-29.2876	2	1
72W30	AU072	EL	2008-12-13	29.9714	-31.2735	84	3103	39.492	-42.2221	2	1
72W30	AU072	EL	2008-12-13	29.9688	-31.2745	84	3110	65.2224	-0.616755	2	1
72W30	AU072	EL	2008-12-14	29.9676	-31.2765	84	3119	69.0588	-999	2	1
72W30	AU072	EL	2008-12-13	29.9697	-31.2714	84	3113	149.972	148.398	2	1
72W30	AU072	EL	2008-12-13	29.9726	-31.2722	84	3102	205.049	31.5815	2	1
72W30	AU072	EL	2008-12-13	29.9709	-31.274	84	3109	227.085	13.3528	2	1
72W30	AU072	EL	2008-12-13	29.9752	-31.2685	84	3100	279.411	-999	2	1
72W30	AU072	EL	2008-12-13	29.9729	-31.2698	84	3101	291.218	-51.3885	2	1
72W30	AU072	EL	2008-12-13	29.9682	-31.2747	84	3112	417.575	-999	2	1
72W30	AU072	EL	2008-12-13	29.97	-31.2727	84	3114	544.184	42.0517	2	1
72W33	AU072	EL	2008-12-20	29.9642	-31.2511	6	3409	0	-999	2	1
72W33	AU072	EL	2008-12-19	29.9636	-31.2526	6	3403	2.73308	-149.335	2	1
72W33	AU072	EL	2008-12-20	29.9638	-31.2515	6	3411	3.42583	-42.87	2	1
72W33	AU072	EL	2008-12-20	29.9682	-31.2498	6	3419	3.42594	103.086	2	1
72W33	AU072	EL	2008-12-19	29.9637	-31.2525	6	3402	12.9542	81.8784	2	1
72W33	AU072	EL	2008-12-19	29.9636	-31.2526	6	3404	36.3189	-85.6833	2	1
72W33	AU072	EL	2008-12-20	29.9642	-31.2511	6	3410	58.0966	-999	2	1
72W33	AU072	EL	2008-12-20	29.9647	-31.2508	6	3408	67.7523	32.7699	2	1
72W33	AU072	EL	2008-12-20	29.97	-31.249	6	3417	74.5023	91.629	2	1
72W33	AU072	EL	2008-12-19	29.9633	-31.2517	6	3401	110.218	155.945	2	1
72W33	AU072	EL	2008-12-19	29.9632	-31.2526	6	3400	111.623	-999	2	1
72W33	AU072	EL	2008-12-20	29.9649	-31.25	6	3414	132.961	118.303	2	1
72W33	AU072	EL	2008-12-19	29.9643	-31.2497	6	3406	133.059	63.8708	2	1
72W33	AU072	EL	2008-12-20	29.9695	-31.2495	6	3418	144.84	39.5585	2	1
72W33	AU072	EL	2008-12-20	29.9656	-31.2495	6	3407	190.35	131.143	2	1
72W33	AU072	EL	2008-12-20	29.9664	-31.2513	6	3413	225.343	-130.736	2	1
72W33	AU072	EL	2008-12-20	29.9679	-31.2477	6	3416	264.434	87.111	2	1
72W33	AU072	EL	2008-12-20	29.9638	-31.2515	6	3412	274.7	-94.8036	2	1
72W33	AU072	EL	2008-12-20	29.9661	-31.2497	6	3415	298.477	-34.1454	2	1
72W33	AU072	EL	2008-12-19	29.9636	-31.2523	6	3405	320.558	8.95459	2	1
72W36	AU072	EL	2008-12-26	29.9658	-31.2768	84	3706	0	-999	2	1
72W36	AU072	EL	2008-12-26	29.9669	-31.2764	84	3712	3.18106	29.7967	2	1
72W36	AU072	EL	2008-12-26	29.9658	-31.2768	84	3707	4.19334	-999	2	1
72W36	AU072	EL	2008-12-26	29.9669	-31.2763	84	3713	7.00967	-155.179	2	1
72W36	AU072	EL	2008-12-26	29.9658	-31.2768	84	3708	7.23243	-115.332	2	1
72W36	AU072	EL	2008-12-26	29.9669	-31.2764	84	3714	8.38675	114.518	2	1
72W36	AU072	EL	2008-12-26	29.9654	-31.2769	84	3704	20.0076	-31.7862	2	1
72W36	AU072	EL	2008-12-26	29.967	-31.2765	84	3711	22.8398	-132.364	2	1
72W36	AU072	EL	2008-12-26	29.9654	-31.2767	84	3705	45.3148	119.058	2	1
72W36	AU072	EL	2008-12-26	29.9654	-31.2772	84	3717	52.6092	-95.3566	2	1
72W36	AU072	EL	2008-12-26	29.9626	-31.2803	84	3701	53.1512	-20.282	2	1
72W36	AU072	EL	2008-12-26	29.9654	-31.2777	84	3718	59.7551	116.247	2	1
72W36	AU072	EL	2008-12-26	29.9664	-31.2764	84	3710	60.7251	48.1392	2	1
72W36	AU072	EL	2008-12-26	29.9657	-31.2769	84	3709	90.4393	-149.579	2	1
72W36	AU072	EL	2008-12-26	29.9618	-31.2796	84	3700	109.671	-999	2	1
72W36	AU072	EL	2008-12-26	29.965	-31.2777	84	3703	111.372	-7.17972	2	1
72W36	AU072	EL	2008-12-26	29.9668	-31.2763	84	3715	121.899	-133.997	2	1
72W36	AU072	EL	2008-12-26	29.9667	-31.2773	84	3716	138.902	90.0137	2	1
72W36	AU072	EL	2008-12-26	29.9649	-31.2775	84	3719	141.892	136.291	2	1
72W36	AU072	EL	2008-12-26	29.963	-31.2805	84	3702	387.57	-84.5236	2	1
72W4	AU072	EL	2008-10-16	29.934	-31.2793	2	300	2.73168	-999	2	1
72W4	AU072	EL	2008-10-16	29.935	-31.2802	2	308	4.3323	177.891	2	1
72W4	AU072	EL	2008-10-16	29.9351	-31.2802	2	303	11.3117	178.533	2	1
72W4	AU072	EL	2008-10-16	29.935	-31.2804	2	306	11.6516	-169.639	2	1
72W4	AU072	EL	2008-10-16	29.9351	-31.2803	2	307	12.8999	-113.564	2	1
72W4	AU072	EL	2008-10-16	29.9352	-31.2801	2	304	16.6532	139.722	2	1
72W4	AU072	EL	2008-10-16	29.9352	-31.2802	2	305	28.653	72.7177	2	1
72W4	AU072	EL	2008-10-16	29.9355	-31.2781	2	316	30.7726	-141.704	2	1
72W4	AU072	EL	2008-10-16	29.934	-31.2814	2	312	40.9898	-8.04856	2	1
72W4	AU072	EL	2008-10-16	29.9358	-31.2783	2	315	45.1106	-62.7045	2	1
72W4	AU072	EL	2008-10-16	29.9343	-31.2808	2	311	75.5897	-72.2412	2	1
72W4	AU072	EL	2008-10-16	29.935	-31.2803	2	309	93.6964	14.0882	2	1
72W4	AU072	EL	2008-10-16	29.9357	-31.2794	2	302	107.967	117.182	2	1
72W4	AU072	EL	2008-10-16	29.9355	-31.281	2	310	119.245	125.04	2	1
72W4	AU072	EL	2008-10-16	29.9356	-31.2797	2	314	169.471	-27.2158	2	1
72W4	AU072	EL	2008-10-16	29.934	-31.2793	2	301	172.603	-175.61	2	1
72W4	AU072	EL	2008-10-16	29.9325	-31.2838	2	319	253.185	19.8548	2	1
72W4	AU072	EL	2008-10-16	29.9339	-31.2817	2	313	299.426	-160.298	2	1
72W4	AU072	EL	2008-10-16	29.9355	-31.2819	2	318	382.011	52.8208	2	1
72W4	AU072	EL	2008-10-16	29.9356	-31.2784	2	317	427.194	16.6132	2	1
72W6	AU072	EL	2008-10-20	29.9327	-31.2916	55	516	3.18031	-1.65003e-05	2	1
72W6	AU072	EL	2008-10-20	29.927	-31.2855	55	502	4.51467	-67.4582	2	1
72W6	AU072	EL	2008-10-20	29.9327	-31.2916	55	514	6.60526	69.1562	2	1
72W6	AU072	EL	2008-10-20	29.9327	-31.2916	55	515	6.60526	-180	2	1
72W6	AU072	EL	2008-10-20	29.9327	-31.2915	55	517	11.3108	149.899	2	1
72W6	AU072	EL	2008-10-20	29.9328	-31.2914	55	519	13.2504	168.105	2	1
72W6	AU072	EL	2008-10-20	29.9328	-31.2916	55	518	19.5711	-149.899	2	1
72W6	AU072	EL	2008-10-20	29.9265	-31.2854	55	501	53.4969	1.2903	2	1
72W6	AU072	EL	2008-10-20	29.9324	-31.2825	2	511	61.3982	1.38234	2	1
72W6	AU072	EL	2008-10-20	29.9258	-31.2852	55	500	67.6061	-999	2	1
72W6	AU072	EL	2008-10-20	29.927	-31.2855	55	503	94.6891	125.609	2	1
72W6	AU072	EL	2008-10-20	29.9293	-31.2901	55	507	120.715	-153.267	2	1
72W6	AU072	EL	2008-10-20	29.928	-31.2873	2	505	153.354	-8.62735	2	1
72W6	AU072	EL	2008-10-20	29.9272	-31.2863	55	504	156.289	-19.0683	2	1
72W6	AU072	EL	2008-10-20	29.929	-31.2883	55	506	216.228	32.4325	2	1
72W6	AU072	EL	2008-10-20	29.9297	-31.2891	55	508	282.485	-47.0342	2	1
72W6	AU072	EL	2008-10-20	29.9284	-31.2871	2	509	331.637	37.128	2	1
72W6	AU072	EL	2008-10-20	29.9297	-31.2906	55	513	332.043	-87.6506	2	1
72W6	AU072	EL	2008-10-20	29.9288	-31.2843	2	510	430.822	51.9647	2	1
72W6	AU072	EL	2008-10-20	29.9329	-31.2823	2	512	1049.67	137.324	2	1
72W8	AU072	EL	2008-10-24	29.9352	-31.2952	55	713	0	-999	2	1
72W8	AU072	EL	2008-10-24	29.9358	-31.2947	55	708	4.19217	-176.788	2	1
72W8	AU072	EL	2008-10-24	29.9335	-31.2974	55	717	6.62595	31.1242	2	1
72W8	AU072	EL	2008-10-24	29.935	-31.2955	55	711	10.1596	138.147	2	1
72W8	AU072	EL	2008-10-24	29.9351	-31.2954	55	710	25.6426	-16.7807	2	1
72W8	AU072	EL	2008-10-24	29.9335	-31.2974	55	718	25.6635	-171.431	2	1
72W8	AU072	EL	2008-10-24	29.935	-31.2955	55	712	32.9863	52.3699	2	1
72W8	AU072	EL	2008-10-24	29.9338	-31.2974	55	716	33.8231	57.5359	2	1
72W8	AU072	EL	2008-10-24	29.9356	-31.2949	55	707	36.9756	22.8013	2	1
72W8	AU072	EL	2008-10-24	29.9352	-31.2952	55	714	58.6504	-999	2	1
72W8	AU072	EL	2008-10-24	29.9354	-31.2956	55	706	78.1316	101.034	2	1
72W8	AU072	EL	2008-10-24	29.9358	-31.2947	55	709	103.429	2.38438	2	1
72W8	AU072	EL	2008-10-24	29.941	-31.2973	55	703	116.174	24.1575	2	1
72W8	AU072	EL	2008-10-24	29.9355	-31.2999	55	700	147.901	-999	2	1
72W8	AU072	EL	2008-10-24	29.9421	-31.2973	55	704	176.53	-106.744	2	1
72W8	AU072	EL	2008-10-24	29.9368	-31.2995	55	701	245.953	-12.3338	2	1
72W8	AU072	EL	2008-10-24	29.9388	-31.2984	55	702	257.955	4.17849	2	1
72W8	AU072	EL	2008-10-24	29.9357	-31.295	55	715	346.781	152.776	2	1
72W8	AU072	EL	2008-10-24	29.9337	-31.2975	55	719	433.726	-85.0766	2	1
72W8	AU072	EL	2008-10-24	29.9415	-31.2959	55	705	630.262	-64.8211	2	1
72W9	AU072	EL	2008-10-24	29.9352	-31.2952	55	713	0	-999	2	1
72W9	AU072	EL	2008-10-24	29.9358	-31.2947	55	708	4.19217	-176.788	2	1
72W9	AU072	EL	2008-10-24	29.9335	-31.2974	55	717	6.62595	31.1242	2	1
72W9	AU072	EL	2008-10-24	29.935	-31.2955	55	711	10.1596	138.147	2	1
72W9	AU072	EL	2008-10-24	29.9351	-31.2954	55	710	25.6426	-16.7807	2	1
72W9	AU072	EL	2008-10-24	29.9335	-31.2974	55	718	25.6635	-171.431	2	1
72W9	AU072	EL	2008-10-24	29.935	-31.2955	55	712	32.9863	52.3699	2	1
72W9	AU072	EL	2008-10-24	29.9338	-31.2974	55	716	33.8231	57.5359	2	1
72W9	AU072	EL	2008-10-24	29.9356	-31.2949	55	707	36.9756	22.8013	2	1
72W9	AU072	EL	2008-10-24	29.9352	-31.2952	55	714	58.6504	-999	2	1
72W9	AU072	EL	2008-10-24	29.9354	-31.2956	55	706	78.1316	101.034	2	1
72W9	AU072	EL	2008-10-24	29.9358	-31.2947	55	709	103.429	2.38438	2	1
72W9	AU072	EL	2008-10-24	29.941	-31.2973	55	703	116.174	24.1575	2	1
72W9	AU072	EL	2008-10-24	29.9355	-31.2999	55	700	147.901	-999	2	1
72W9	AU072	EL	2008-10-24	29.9421	-31.2973	55	704	176.53	-106.744	2	1
72W9	AU072	EL	2008-10-24	29.9368	-31.2995	55	701	245.953	-12.3338	2	1
72W9	AU072	EL	2008-10-24	29.9388	-31.2984	55	702	257.955	4.17849	2	1
72W9	AU072	EL	2008-10-24	29.9357	-31.295	55	715	346.781	152.776	2	1
72W9	AU072	EL	2008-10-24	29.9337	-31.2975	55	719	433.726	-85.0766	2	1
72W9	AU072	EL	2008-10-24	29.9415	-31.2959	55	705	630.262	-64.8211	2	1
73W1	AU073	EL	2008-10-08	29.9884	-31.2923	84	14	3.18138	157.535	2	1
73W1	AU073	EL	2008-10-08	29.9881	-31.2919	84	16	3.4261	-149.58	2	1
73W1	AU073	EL	2008-10-08	29.9884	-31.2923	84	13	7.15012	-143.679	2	1
73W1	AU073	EL	2008-10-08	29.9866	-31.2878	3	23	16.6224	47.1064	2	1
73W1	AU073	EL	2008-10-08	29.9883	-31.2922	84	12	23.6933	-0.0817843	2	1
73W1	AU073	EL	2008-10-08	29.9882	-31.2892	3	21	52.6154	-54.8085	2	1
73W1	AU073	EL	2008-10-08	29.9884	-31.2923	84	15	61.0144	149.579	2	1
73W1	AU073	EL	2008-10-08	29.9853	-31.2889	3	9	70.5702	-50.7545	2	1
73W1	AU073	EL	2008-10-08	29.988	-31.291	84	11	142.11	40.6038	2	1
73W1	AU073	EL	2008-10-08	29.9844	-31.2931	84	18	151.263	109.804	2	1
73W1	AU073	EL	2008-10-08	29.9882	-31.2887	3	22	202.987	-56.5687	2	1
73W1	AU073	EL	2008-10-08	29.9865	-31.2902	3	20	210.625	7.31095	2	1
73W1	AU073	EL	2008-10-08	29.9888	-31.2861	3	4	244.881	-999	2	1
73W1	AU073	EL	2008-10-08	29.9843	-31.2919	84	19	306.442	48.613	2	1
73W1	AU073	EL	2008-10-08	29.9855	-31.2895	3	10	315.95	-33.2536	2	1
73W1	AU073	EL	2008-10-08	29.9868	-31.2866	3	8	325.184	16.1265	2	1
73W1	AU073	EL	2008-10-08	29.988	-31.2836	3	6	395.54	19.6045	2	1
73W1	AU073	EL	2008-10-08	29.9881	-31.2919	84	17	413.986	69.0795	2	1
73W1	AU073	EL	2008-10-08	29.989	-31.2882	3	5	562.407	175.616	2	1
73W1	AU073	EL	2008-10-08	29.9886	-31.2803	3	7	773.936	-175.112	2	1
73W11	AU073	EL	2008-11-19	29.9649	-31.2323	6	2010	0	-999	2	1
73W11	AU073	EL	2008-11-19	29.9707	-31.2352	6	2004	2.94408	-90.0011	2	1
73W11	AU073	EL	2008-11-19	29.9649	-31.2323	6	2009	3.18126	-30.2332	2	1
73W11	AU073	EL	2008-11-19	29.9707	-31.2353	6	2003	13.2149	-2.35589	2	1
73W11	AU073	EL	2008-11-19	29.9643	-31.2331	6	2008	106.498	77.6578	2	1
73W11	AU073	EL	2008-11-19	29.9636	-31.2328	6	2014	113.895	77.4378	2	1
73W11	AU073	EL	2008-11-19	29.9707	-31.2365	6	2002	138.139	151.532	2	1
73W11	AU073	EL	2008-11-19	29.9644	-31.2335	6	2015	173.371	75.3211	2	1
73W11	AU073	EL	2008-11-19	29.9712	-31.2374	6	2006	188.508	113.382	2	1
73W11	AU073	EL	2008-11-19	29.9635	-31.2347	6	2016	236.098	81.5794	2	1
73W11	AU073	EL	2008-11-19	29.9713	-31.2319	6	2000	268.776	-999	2	1
73W11	AU073	EL	2008-11-19	29.9707	-31.2352	6	2005	270.574	-100.25	2	1
73W11	AU073	EL	2008-11-19	29.9607	-31.2325	6	2012	299.779	-69.4169	2	1
73W11	AU073	EL	2008-11-19	29.9614	-31.234	6	2017	316.91	-7.25898	2	1
73W11	AU073	EL	2008-11-19	29.9725	-31.2339	85	2001	363.629	57.6615	2	1
73W11	AU073	EL	2008-11-19	29.9636	-31.2317	6	2019	383.512	-101.394	2	1
73W11	AU073	EL	2008-11-19	29.9649	-31.2323	6	2011	435.485	-999	2	1
73W11	AU073	EL	2008-11-19	29.9598	-31.2348	6	2013	466.376	-138.956	2	1
73W11	AU073	EL	2008-11-19	29.9585	-31.2333	55	2018	566.649	144.689	2	1
73W11	AU073	EL	2008-11-19	29.9694	-31.237	6	2007	709.318	29.4398	2	1
73W13	AU073	EL	2008-11-27	30.0271	-31.2695	55	2417	2.73357	89.9989	2	1
73W13	AU073	EL	2008-11-27	30.0309	-31.2685	55	2407	2.73366	11.0468	2	1
73W13	AU073	EL	2008-11-27	30.0308	-31.2686	55	2409	4.51793	80.0074	2	1
73W13	AU073	EL	2008-11-27	30.0308	-31.2686	55	2410	6.50859	-20.0665	2	1
73W13	AU073	EL	2008-11-27	30.0314	-31.2684	55	2414	6.63186	24.1871	2	1
73W13	AU073	EL	2008-11-27	30.0307	-31.2685	55	2411	10.2248	77.4633	2	1
73W13	AU073	EL	2008-11-27	30.0309	-31.2685	55	2408	12.9575	149.33	2	1
73W13	AU073	EL	2008-11-27	30.0271	-31.2696	55	2416	12.9738	107.674	2	1
73W13	AU073	EL	2008-11-27	30.0315	-31.2682	55	2413	19.9488	143.186	2	1
73W13	AU073	EL	2008-11-27	30.0306	-31.2686	55	2406	34.4946	35.8524	2	1
73W13	AU073	EL	2008-11-27	30.0308	-31.2684	55	2412	83.3697	54.777	2	1
73W13	AU073	EL	2008-11-27	30.0263	-31.2708	7	2401	109.056	-73.0207	2	1
73W13	AU073	EL	2008-11-27	30.0256	-31.2696	7	2400	159.168	-999	2	1
73W13	AU073	EL	2008-11-27	30.0261	-31.2717	7	2403	180.2	-179.224	2	1
73W13	AU073	EL	2008-11-27	30.0273	-31.2707	55	2402	182.591	145.848	2	1
73W13	AU073	EL	2008-11-27	30.0271	-31.2695	55	2418	187.718	172.959	2	1
73W13	AU073	EL	2008-11-27	30.0292	-31.2698	55	2405	202.5	-18.5292	2	1
73W13	AU073	EL	2008-11-27	30.0273	-31.2707	55	2404	221.53	15.4833	2	1
73W13	AU073	EL	2008-11-28	30.0253	-31.2696	7	2419	257.488	10.7461	2	1
73W13	AU073	EL	2008-11-27	30.0314	-31.2684	55	2415	465.229	13.4406	2	1
73W16	AU073	EL	2008-12-10	29.934	-31.2873	55	3008	0	-999	2	1
73W16	AU073	EL	2008-12-10	29.9301	-31.2896	55	3016	11.3109	-162.858	2	1
73W16	AU073	EL	2008-12-10	29.9339	-31.2873	55	3007	11.8516	-111.519	2	1
73W16	AU073	EL	2008-12-10	29.9301	-31.2896	55	3017	18.0592	38.4446	2	1
73W16	AU073	EL	2008-12-10	29.9303	-31.2895	55	3018	52.6677	-71.5178	2	1
73W16	AU073	EL	2008-12-10	29.9329	-31.2829	2	3012	88.7041	4.33501	2	1
73W16	AU073	EL	2008-12-10	29.934	-31.2865	55	3006	102.118	-139.116	2	1
73W16	AU073	EL	2008-12-10	29.934	-31.2825	2	3011	115.307	-122.29	2	1
73W16	AU073	EL	2008-12-10	29.9312	-31.2866	2	3014	116.411	16.7333	2	1
73W16	AU073	EL	2008-12-10	29.9349	-31.2876	55	3005	162.722	114.178	2	1
73W16	AU073	EL	2008-12-10	29.934	-31.2873	55	3009	197.073	-999	2	1
73W16	AU073	EL	2008-12-10	29.9485	-31.2845	55	3000	237.836	-999	2	1
73W16	AU073	EL	2008-12-10	29.9307	-31.2874	2	3015	276.386	-16.0865	2	1
73W16	AU073	EL	2008-12-10	29.9401	-31.2836	2	3002	291.834	-90.1316	2	1
73W16	AU073	EL	2008-12-10	29.9396	-31.286	55	3003	324.237	99.6566	2	1
73W16	AU073	EL	2008-12-10	29.9366	-31.285	2	3004	359.233	-81.7155	2	1
73W16	AU073	EL	2008-12-10	29.9333	-31.2858	2	3010	397.76	34.2556	2	1
73W16	AU073	EL	2008-12-10	29.9321	-31.2831	2	3013	423.679	-60.357	2	1
73W16	AU073	EL	2008-12-10	29.9303	-31.2891	55	3019	452.725	-50.5219	2	1
73W16	AU073	EL	2008-12-10	29.9462	-31.2847	55	3001	640.02	16.5635	2	1
73W17	AU073	EL	2008-12-14	29.9313	-31.2797	2	3219	10.3956	-44.875	2	1
73W17	AU073	EL	2008-12-14	29.9328	-31.2814	2	3202	13.2108	-159.693	2	1
73W17	AU073	EL	2008-12-14	29.9311	-31.2799	2	3218	22.5182	-3.33215	2	1
73W17	AU073	EL	2008-12-14	29.9333	-31.2796	2	3213	28.6104	-15.6525	2	1
73W17	AU073	EL	2008-12-14	29.9297	-31.2827	2	3206	42.562	-61.1502	2	1
73W17	AU073	EL	2008-12-14	29.9329	-31.2817	2	3201	49.0408	-20.3076	2	1
73W17	AU073	EL	2008-12-14	29.9306	-31.2805	2	3209	62.9999	36.9012	2	1
73W17	AU073	EL	2008-12-14	29.9312	-31.2804	2	3210	75.0698	-51.6919	2	1
73W17	AU073	EL	2008-12-14	29.9316	-31.2799	2	3211	84.1815	108.676	2	1
73W17	AU073	EL	2008-12-14	29.9293	-31.2827	2	3207	84.2571	28.7972	2	1
73W17	AU073	EL	2008-12-14	29.9328	-31.2815	2	3203	90.7059	29.7181	2	1
73W17	AU073	EL	2008-12-14	29.9329	-31.2828	2	3200	121.588	-999	2	1
73W17	AU073	EL	2008-12-14	29.9321	-31.2804	2	3212	160.712	-85.6623	2	1
73W17	AU073	EL	2008-12-14	29.9303	-31.2839	2	3205	162.736	111.529	2	1
73W17	AU073	EL	2008-12-14	29.9301	-31.2812	2	3217	191.882	128.941	2	1
73W17	AU073	EL	2008-12-14	29.9327	-31.2828	2	3215	218.298	156.858	2	1
73W17	AU073	EL	2008-12-14	29.9323	-31.281	2	3216	221.195	-84.0262	2	1
73W17	AU073	EL	2008-12-14	29.9286	-31.2823	2	3208	301.004	100.855	2	1
73W17	AU073	EL	2008-12-14	29.9323	-31.2821	2	3204	301.18	14.186	2	1
73W17	AU073	EL	2008-12-14	29.9335	-31.2794	2	3214	421.973	154.693	2	1
73W20	AU073	EL	2008-12-27	29.9935	-31.2988	84	3816	0	-999	2	1
73W20	AU073	EL	2008-12-27	29.9935	-31.2988	84	3815	2.73201	-109.261	2	1
73W20	AU073	EL	2008-12-27	29.9935	-31.2988	84	3817	2.73201	-999	2	1
73W20	AU073	EL	2008-12-27	29.9992	-31.3024	84	3806	4.33336	-101.636	2	1
73W20	AU073	EL	2008-12-27	29.9992	-31.3024	84	3804	4.38217	-29.3856	2	1
73W20	AU073	EL	2008-12-27	29.9991	-31.3024	84	3805	6.62839	-159.693	2	1
73W20	AU073	EL	2008-12-26	30.0009	-31.3019	55	3801	20.0093	119.407	2	1
73W20	AU073	EL	2008-12-27	30.0008	-31.3019	84	3802	42.38	4.51171	2	1
73W20	AU073	EL	2008-12-27	29.9992	-31.3023	84	3807	79.2511	-143.327	2	1
73W20	AU073	EL	2008-12-26	30.0002	-31.3011	84	3800	117.673	-999	2	1
73W20	AU073	EL	2008-12-27	30.0004	-31.302	84	3803	131.052	-17.4096	2	1
73W20	AU073	EL	2008-12-27	29.9935	-31.2988	84	3818	172.116	-34.8614	2	1
73W20	AU073	EL	2008-12-27	29.9946	-31.3017	84	3809	184.219	-40.6614	2	1
73W20	AU073	EL	2008-12-27	29.9941	-31.2973	84	3814	187.948	-4.45408	2	1
73W20	AU073	EL	2008-12-27	29.9915	-31.2999	84	3811	228.536	92.6631	2	1
73W20	AU073	EL	2008-12-27	29.9952	-31.2951	55	3813	301.517	-176.803	2	1
73W20	AU073	EL	2008-12-27	29.993	-31.3023	84	3810	328.313	84.9243	2	1
73W20	AU073	EL	2008-12-27	29.9949	-31.298	84	3819	350.888	-149.419	2	1
73W20	AU073	EL	2008-12-27	29.9993	-31.303	84	3808	502.843	113.59	2	1
73W20	AU073	EL	2008-12-27	29.9935	-31.2991	84	3812	522.872	-43.916	2	1
73W27	AU073	EL	2009-01-26	30.0295	-31.2725	55	5208	2.7335	136.08	2	1
73W27	AU073	EL	2009-01-26	30.0294	-31.2724	55	5211	2.73351	149.796	2	1
73W27	AU073	EL	2009-01-26	30.0303	-31.2719	55	5203	2.73354	128.576	2	1
73W27	AU073	EL	2009-01-27	30.0294	-31.2724	55	5214	3.18229	-139.338	2	1
73W27	AU073	EL	2009-01-27	30.0297	-31.2723	55	5217	4.33504	137.229	2	1
73W27	AU073	EL	2009-01-26	30.0303	-31.2719	55	5202	4.38371	163.892	2	1
73W27	AU073	EL	2009-01-26	30.0295	-31.2725	55	5209	6.63153	-31.1169	2	1
73W27	AU073	EL	2009-01-26	30.0303	-31.2719	55	5201	7.15234	134.288	2	1
73W27	AU073	EL	2009-01-27	30.0297	-31.2723	55	5216	9.79168	-89.9989	2	1
73W27	AU073	EL	2009-01-27	30.0293	-31.2723	55	5213	12.9079	-173.838	2	1
73W27	AU073	EL	2009-01-26	30.0294	-31.2724	55	5212	19.3184	-136.823	2	1
73W27	AU073	EL	2009-01-26	30.0296	-31.2725	55	5210	19.4637	-118.68	2	1
73W27	AU073	EL	2009-01-26	30.0302	-31.272	55	5200	21.3134	-999	2	1
73W27	AU073	EL	2009-01-26	30.0297	-31.2726	55	5207	23.6446	96.7595	2	1
73W27	AU073	EL	2009-01-26	30.0303	-31.2719	55	5204	32.8023	-89.999	2	1
73W27	AU073	EL	2009-01-27	30.0294	-31.2723	55	5215	33.8535	89.9991	2	1
73W27	AU073	EL	2009-01-26	30.0303	-31.2716	55	5205	41.8003	61.6815	2	1
73W27	AU073	EL	2009-01-27	30.0297	-31.2723	55	5218	46.1021	-133.83	2	1
73W27	AU073	EL	2009-01-26	30.0307	-31.2715	55	5206	177.539	155.477	2	1
73W27	AU073	EL	2009-01-27	30.0298	-31.2719	55	5219	191.932	39.2151	2	1
73W30	AU073	EL	2009-02-08	29.9716	-31.2795	84	5808	3.42583	-141.425	2	1
73W30	AU073	EL	2009-02-08	29.9716	-31.2795	84	5807	4.38195	14.1256	2	1
73W30	AU073	EL	2009-02-08	29.9674	-31.279	84	5819	4.51588	-118.111	2	1
73W30	AU073	EL	2009-02-08	29.962	-31.2846	84	5800	13.4925	-999	2	1
73W30	AU073	EL	2009-02-08	29.9673	-31.279	84	5818	14.6415	-157.103	2	1
73W30	AU073	EL	2009-02-08	29.9619	-31.2845	84	5801	16.3939	-168.318	2	1
73W30	AU073	EL	2009-02-08	29.9716	-31.2795	84	5809	17.4191	-139.341	2	1
73W30	AU073	EL	2009-02-08	29.9714	-31.2793	84	5806	21.4014	86.5788	2	1
73W30	AU073	EL	2009-02-08	29.9676	-31.2788	84	5817	45.148	69.0865	2	1
73W30	AU073	EL	2009-02-08	29.9715	-31.2796	84	5810	62.0835	52.2767	2	1
73W30	AU073	EL	2009-02-08	29.9619	-31.2846	84	5802	78.8437	177.861	2	1
73W30	AU073	EL	2009-02-08	29.9691	-31.2811	84	5813	90.2661	40.412	2	1
73W30	AU073	EL	2009-02-08	29.9673	-31.2779	84	5816	112.236	-163.96	2	1
73W30	AU073	EL	2009-02-08	29.9709	-31.2795	84	5811	133.782	21.8251	2	1
73W30	AU073	EL	2009-02-08	29.9705	-31.2803	84	5805	147.231	-31.9414	2	1
73W30	AU073	EL	2009-02-08	29.9685	-31.2796	84	5815	233.048	-31.9301	2	1
73W30	AU073	EL	2009-02-08	29.9684	-31.2816	84	5814	239.87	127.006	2	1
73W30	AU073	EL	2009-02-08	29.9697	-31.2791	84	5812	257.417	-100.825	2	1
73W30	AU073	EL	2009-02-08	29.9666	-31.2813	84	5804	419.647	15.7823	2	1
73W30	AU073	EL	2009-02-08	29.9619	-31.284	84	5803	583.136	59.0225	2	1
73W31	AU073	EL	2009-02-12	29.9701	-31.2845	84	6018	2.7321	49.3413	2	1
73W31	AU073	EL	2009-02-12	29.9702	-31.2844	84	6015	3.18107	-98.0507	2	1
73W31	AU073	EL	2009-02-12	29.9702	-31.2844	84	6016	4.38178	-38.5733	2	1
73W31	AU073	EL	2009-02-12	29.9702	-31.2845	84	6017	8.7092	79.2309	2	1
73W31	AU073	EL	2009-02-12	29.9702	-31.2843	84	6013	19.4544	-149.793	2	1
73W31	AU073	EL	2009-02-12	29.9704	-31.2844	84	6014	22.7112	157.845	2	1
73W31	AU073	EL	2009-02-12	29.9769	-31.2853	84	6009	30.2572	-48.1115	2	1
73W31	AU073	EL	2009-02-12	29.9701	-31.2845	84	6019	51.0485	-56.5178	2	1
73W31	AU073	EL	2009-02-12	29.9769	-31.2848	84	6008	53.2794	27.3146	2	1
73W31	AU073	EL	2009-02-12	29.9707	-31.2843	84	6012	53.5915	10.3501	2	1
73W31	AU073	EL	2009-02-12	29.9713	-31.2843	84	6011	54.4784	-23.0524	2	1
73W31	AU073	EL	2009-02-12	29.9772	-31.2827	84	6005	149.211	16.0323	2	1
73W31	AU073	EL	2009-02-12	29.9762	-31.2818	84	6006	164.872	-79.7445	2	1
73W31	AU073	EL	2009-02-12	29.9814	-31.2767	84	6001	191.398	-1.61259	2	1
73W31	AU073	EL	2009-02-12	29.9789	-31.2837	84	6004	207.612	107.217	2	1
73W31	AU073	EL	2009-02-12	29.9827	-31.2753	84	6000	216.265	-999	2	1
73W31	AU073	EL	2009-02-12	29.9803	-31.278	84	6002	315.913	-27.4907	2	1
73W31	AU073	EL	2009-02-12	29.9749	-31.2825	84	6007	347.154	-95.1922	2	1
73W31	AU073	EL	2009-02-12	29.9799	-31.2806	84	6003	384.861	6.56966	2	1
73W31	AU073	EL	2009-02-12	29.9772	-31.2854	84	6010	627.78	159.887	2	1
73W35	AU073	EL	2009-03-01	30.0047	-31.2974	84	6808	7.23362	163.348	2	1
73W35	AU073	EL	2009-03-01	30.002	-31.2986	84	6802	14.4361	60.8751	2	1
73W35	AU073	EL	2009-03-01	30.0021	-31.2986	84	6803	25.6283	-160.137	2	1
73W35	AU073	EL	2009-03-01	30.0047	-31.2975	84	6809	25.6533	-177.744	2	1
73W35	AU073	EL	2009-03-01	30.0114	-31.2904	55	6819	25.6639	-19.706	2	1
73W35	AU073	EL	2009-03-01	30.0125	-31.2909	55	6817	42.7917	-82.5573	2	1
73W35	AU073	EL	2009-03-01	30.0113	-31.2922	55	6815	45.6726	-104.41	2	1
73W35	AU073	EL	2009-03-01	30.0044	-31.2977	84	6807	51.9393	5.02117	2	1
73W35	AU073	EL	2009-03-01	30.0033	-31.298	84	6805	71.4776	42.5234	2	1
73W35	AU073	EL	2009-03-01	30.004	-31.2982	84	6806	72.8725	-73.1416	2	1
73W35	AU073	EL	2009-03-01	30.0113	-31.2915	55	6814	79.2588	150.074	2	1
73W35	AU073	EL	2009-03-01	30.0122	-31.2907	55	6818	85.6898	-10.3572	2	1
73W35	AU073	EL	2009-03-01	30.0008	-31.2997	84	6800	89.204	-999	2	1
73W35	AU073	EL	2009-03-01	30.0048	-31.2973	84	6810	106.32	74.4876	2	1
73W35	AU073	EL	2009-03-01	30.0068	-31.2967	55	6812	118.386	-4.98801	2	1
73W35	AU073	EL	2009-03-01	30.0016	-31.2996	84	6801	119.901	-62.8549	2	1
73W35	AU073	EL	2009-03-01	30.0058	-31.2974	55	6811	134.902	-51.9368	2	1
73W35	AU073	EL	2009-03-01	30.0019	-31.2986	84	6804	163.482	149.122	2	1
73W35	AU073	EL	2009-03-01	30.0117	-31.2921	55	6816	167.525	-51.3881	2	1
73W35	AU073	EL	2009-03-01	30.0076	-31.296	84	6813	662.377	-7.80396	2	1
73W37	AU073	EL	2009-03-10	29.979	-31.2972	84	7218	3.18117	-59.7894	2	1
73W37	AU073	EL	2009-03-09	29.9739	-31.3026	84	7210	4.33276	-154.132	2	1
73W37	AU073	EL	2009-03-10	29.979	-31.2972	84	7219	6.44893	57.9102	2	1
73W37	AU073	EL	2009-03-09	29.9828	-31.2901	84	7200	13.0407	-999	2	1
73W37	AU073	EL	2009-03-10	29.9791	-31.2971	84	7217	13.131	-44.0893	2	1
73W37	AU073	EL	2009-03-09	29.9739	-31.3026	84	7211	20.0374	-51.2027	2	1
73W37	AU073	EL	2009-03-09	29.9802	-31.2945	84	7206	36.6585	-146.761	2	1
73W37	AU073	EL	2009-03-09	29.9739	-31.3025	84	7212	69.8212	84.8608	2	1
73W37	AU073	EL	2009-03-09	29.9796	-31.294	84	7205	79.8655	-103.63	2	1
73W37	AU073	EL	2009-03-09	29.9804	-31.2928	84	7203	95.6051	-47.3282	2	1
73W37	AU073	EL	2009-03-10	29.98	-31.2973	84	7216	95.8917	-147.053	2	1
73W37	AU073	EL	2009-03-09	29.9805	-31.2936	84	7204	96.38	64.8902	2	1
73W37	AU073	EL	2009-03-09	29.9745	-31.3023	84	7213	115.706	31.8206	2	1
73W37	AU073	EL	2009-03-09	29.9827	-31.29	84	7201	197.131	-115.011	2	1
73W37	AU073	EL	2009-03-09	29.9819	-31.2915	84	7202	223.568	20.2941	2	1
73W37	AU073	EL	2009-03-09	29.9801	-31.2942	84	7207	225.889	-90.3237	2	1
73W37	AU073	EL	2009-03-09	29.9779	-31.2945	84	7208	341.648	-43.7044	2	1
73W37	AU073	EL	2009-03-10	29.9762	-31.2984	84	7215	411.99	63.5747	2	1
73W37	AU073	EL	2009-03-10	29.9756	-31.3026	84	7214	507.034	-100.882	2	1
73W37	AU073	EL	2009-03-09	29.976	-31.2968	84	7209	738.307	-20.1759	2	1
73W38	AU073	EL	2009-03-13	29.9893	-31.3086	84	7405	2.73161	138.515	2	1
73W38	AU073	EL	2009-03-14	29.9894	-31.3086	84	7406	2.73161	180	2	1
73W38	AU073	EL	2009-03-14	29.9896	-31.3081	84	7412	2.94175	130.65	2	1
73W38	AU073	EL	2009-03-14	29.9894	-31.3086	84	7408	7.14969	37.3266	2	1
73W38	AU073	EL	2009-03-14	29.9897	-31.3081	84	7411	8.70879	-70.7471	2	1
73W38	AU073	EL	2009-03-14	29.9896	-31.3082	84	7410	11.314	16.7234	2	1
73W38	AU073	EL	2009-03-14	29.9893	-31.3086	84	7407	13.1302	-149.787	2	1
73W38	AU073	EL	2009-03-13	29.9894	-31.3087	84	7404	15.1463	-4.39424	2	1
73W38	AU073	EL	2009-03-14	29.9896	-31.3081	84	7413	22.0441	-153.638	2	1
73W38	AU073	EL	2009-03-14	29.991	-31.3055	84	7418	40.0538	-153.09	2	1
73W38	AU073	EL	2009-03-13	29.9887	-31.3091	84	7401	40.654	-4.63647	2	1
73W38	AU073	EL	2009-03-14	29.9895	-31.3087	84	7409	60.872	-144.166	2	1
73W38	AU073	EL	2009-03-13	29.9882	-31.3094	84	7400	62.4294	-999	2	1
73W38	AU073	EL	2009-03-14	29.992	-31.3058	84	7416	66.8913	-73.4623	2	1
73W38	AU073	EL	2009-03-14	29.9917	-31.3053	84	7417	76.8605	-79.7107	2	1
73W38	AU073	EL	2009-03-13	29.9902	-31.3093	55	7403	105.335	-155.338	2	1
73W38	AU073	EL	2009-03-14	29.9914	-31.3056	84	7419	107.409	125.754	2	1
73W38	AU073	EL	2009-03-13	29.989	-31.3089	84	7402	127.125	61.3144	2	1
73W38	AU073	EL	2009-03-14	29.9894	-31.308	84	7414	154.371	109.028	2	1
73W38	AU073	EL	2009-03-14	29.9905	-31.3071	84	7415	216.766	0.367227	2	1
73W4	AU073	EL	2008-10-21	29.9728	-31.2473	6	614	0	-999	2	1
73W4	AU073	EL	2008-10-21	29.9637	-31.2419	6	619	3.42589	167.295	2	1
73W4	AU073	EL	2008-10-20	29.9633	-31.2502	6	600	7.233	-999	2	1
73W4	AU073	EL	2008-10-21	29.9631	-31.2505	6	602	12.9047	-168.931	2	1
73W4	AU073	EL	2008-10-21	29.9633	-31.2502	6	601	34.0529	5.58573	2	1
73W4	AU073	EL	2008-10-21	29.9638	-31.2415	6	618	50.6716	-100.712	2	1
73W4	AU073	EL	2008-10-21	29.9634	-31.2498	6	604	59.2261	-21.1832	2	1
73W4	AU073	EL	2008-10-21	29.9655	-31.2496	6	606	62.6578	-96.4639	2	1
73W4	AU073	EL	2008-10-21	29.9632	-31.2504	6	603	82.1783	-24.7807	2	1
73W4	AU073	EL	2008-10-21	29.9733	-31.245	6	609	94.4327	168.651	2	1
73W4	AU073	EL	2008-10-21	29.9733	-31.2461	6	613	152.11	35.9007	2	1
73W4	AU073	EL	2008-10-21	29.9634	-31.2493	6	605	227.559	106.959	2	1
73W4	AU073	EL	2008-10-21	29.9728	-31.2473	6	615	228.521	-999	2	1
73W4	AU073	EL	2008-10-21	29.9702	-31.2428	6	611	260.732	145.972	2	1
73W4	AU073	EL	2008-10-21	29.9664	-31.2425	6	617	289.4	-14.1731	2	1
73W4	AU073	EL	2008-10-21	29.9726	-31.2435	6	612	325.198	58.341	2	1
73W4	AU073	EL	2008-10-21	29.9727	-31.2456	6	610	427.375	104.82	2	1
73W4	AU073	EL	2008-10-21	29.9656	-31.2491	6	607	427.414	64.5355	2	1
73W4	AU073	EL	2008-10-21	29.9695	-31.2479	6	608	527.04	-21.5858	2	1
73W4	AU073	EL	2008-10-21	29.9714	-31.2458	6	616	651.939	-13.3468	2	1
73W40	AU073	EL	2009-03-22	30.0172	-31.2779	3	7803	4.33454	-93.548	2	1
73W40	AU073	EL	2009-03-22	30.0385	-31.2626	7	7817	9.08362	-83.1427	2	1
73W40	AU073	EL	2009-03-22	30.0375	-31.264	55	7810	14.1628	130.562	2	1
73W40	AU073	EL	2009-03-22	30.0206	-31.2763	55	7800	15.5601	-999	2	1
73W40	AU073	EL	2009-03-22	30.0389	-31.2629	55	7813	18.4335	-64.624	2	1
73W40	AU073	EL	2009-03-22	30.039	-31.2622	55	7815	39.1155	-75.215	2	1
73W40	AU073	EL	2009-03-22	30.0373	-31.2644	55	7809	58.4624	-2.35529	2	1
73W40	AU073	EL	2009-03-22	30.0387	-31.262	55	7816	74.8761	-104.736	2	1
73W40	AU073	EL	2009-03-22	30.0388	-31.2628	7	7814	75.1123	42.4117	2	1
73W40	AU073	EL	2009-03-22	30.0376	-31.2641	55	7811	75.9394	41.0387	2	1
73W40	AU073	EL	2009-03-22	30.0386	-31.2627	7	7818	86.593	-102.801	2	1
73W40	AU073	EL	2009-03-22	30.0364	-31.2659	55	7808	197.422	-25.0427	2	1
73W40	AU073	EL	2009-03-22	30.0172	-31.2779	3	7804	201.48	-90.482	2	1
73W40	AU073	EL	2009-03-22	30.0187	-31.2768	3	7802	207.879	-20.0823	2	1
73W40	AU073	EL	2009-03-22	30.0207	-31.2762	55	7801	220.991	-174.005	2	1
73W40	AU073	EL	2009-03-22	30.0373	-31.2647	55	7812	269.287	-159.931	2	1
73W40	AU073	EL	2009-03-22	30.0387	-31.2619	55	7819	541.126	-155.065	2	1
73W40	AU073	EL	2009-03-22	30.0253	-31.2733	55	7806	623.443	-8.53995	2	1
73W40	AU073	EL	2009-03-22	30.0186	-31.2768	3	7805	807.889	12.148	2	1
[truncated: 4,248 more rows]

## Sheet: Hartebeest
Walk	Unit_ID	Species	PointDATE	Longitude	Latitude	ID_F	ID_NR	STEPLENGTH	TURNANGLE	Success	View
371W1	AU371	RH	2009-11-09	29.9987	-31.2387	15	17	0.962436	-152.725	2	1
371W1	AU371	RH	2009-11-09	29.9987	-31.2387	15	16	1.35352	129.04	2	1
371W1	AU371	RH	2009-11-09	29.9997	-31.243	15	5	2.09498	-46.9775	2	1
371W1	AU371	RH	2009-11-09	30.0001	-31.2437	15	8	2.18407	-72.5538	2	1
371W1	AU371	RH	2009-11-09	29.9987	-31.2387	15	18	2.39959	-154.481	2	1
371W1	AU371	RH	2009-11-09	29.9997	-31.243	15	6	6.18603	63.9198	2	1
371W1	AU371	RH	2009-11-09	29.9987	-31.2387	15	19	12.5393	-173.116	2	1
371W1	AU371	RH	2009-11-09	29.9994	-31.2444	15	12	20.5363	-125.961	2	1
371W1	AU371	RH	2009-11-09	30.0001	-31.244	15	10	34.0788	96.0041	2	1
371W1	AU371	RH	2009-11-09	30.0002	-31.2437	15	9	39.3236	109.701	2	1
371W1	AU371	RH	2009-11-09	29.9995	-31.244	15	2	49.3033	-999	2	1
371W1	AU371	RH	2009-11-09	29.9988	-31.2386	15	20	62.9243	23.6596	2	1
371W1	AU371	RH	2009-11-09	29.9998	-31.2439	15	11	66.1433	-78.1241	2	1
371W1	AU371	RH	2009-11-09	30	-31.244	15	3	71.6458	-150.37	2	1
371W1	AU371	RH	2009-11-09	29.9994	-31.2437	15	4	90.9384	87.7359	2	1
371W1	AU371	RH	2009-11-09	29.9998	-31.243	15	7	98.9867	115.558	2	1
371W1	AU371	RH	2009-11-09	29.9996	-31.2444	15	13	162.537	-66.3686	2	1
371W1	AU371	RH	2009-11-09	30.0001	-31.2431	15	14	349.578	-84.2119	2	1
371W1	AU371	RH	2009-11-09	29.9971	-31.2419	15	15	424.59	88.9688	2	1
371W10	AU371	RH	2009-11-28	30.0372	-31.2629	7	919	0.95683	64.0707	1	2
371W10	AU371	RH	2009-11-27	30.0381	-31.2635	55	907	2.0227	-16.0651	1	2
371W10	AU371	RH	2009-11-28	30.0372	-31.2629	7	920	2.50907	144.531	1	2
371W10	AU371	RH	2009-11-28	30.0372	-31.2629	7	918	2.77524	-82.0513	1	2
371W10	AU371	RH	2009-11-28	30.0372	-31.2629	7	916	4.0983	-19.6107	1	2
371W10	AU371	RH	2009-11-28	30.0373	-31.2629	7	915	6.58302	25.3901	1	2
371W10	AU371	RH	2009-11-28	30.0372	-31.2629	7	917	9.09585	-164.201	1	2
371W10	AU371	RH	2009-11-28	30.0385	-31.2622	55	913	21.9468	-100.124	1	2
371W10	AU371	RH	2009-11-27	30.0367	-31.2657	55	904	25.9683	-74.0837	1	2
371W10	AU371	RH	2009-11-27	30.0334	-31.2675	55	901	29.848	-999	1	2
371W10	AU371	RH	2009-11-27	30.0386	-31.2635	55	911	34.5303	-8.82787	1	2
371W10	AU371	RH	2009-11-27	30.0376	-31.2638	55	909	60.0481	-141.536	1	2
371W10	AU371	RH	2009-11-27	30.0382	-31.2639	55	910	63.7623	-53.3967	1	2
371W10	AU371	RH	2009-11-27	30.0381	-31.2635	55	908	64.4268	-143.105	1	2
371W10	AU371	RH	2009-11-27	30.0376	-31.2643	55	906	101.506	0.771811	1	2
371W10	AU371	RH	2009-11-27	30.0336	-31.2676	55	902	114.172	-63.0281	1	2
371W10	AU371	RH	2009-11-27	30.0388	-31.2632	55	912	123.419	-45.4937	1	2
371W10	AU371	RH	2009-11-28	30.0383	-31.2623	7	914	126.757	-9.17323	1	2
371W10	AU371	RH	2009-11-27	30.0367	-31.2655	55	905	174.475	48.6167	1	2
371W10	AU371	RH	2009-11-27	30.0344	-31.2669	55	903	282.593	16.6953	1	2
371W11	AU371	RH	2009-12-04	29.9868	-31.2431	15	1204	1.80443	-170.267	1	2
371W11	AU371	RH	2009-12-04	29.9872	-31.2432	15	1208	2.04502	30.5718	1	2
371W11	AU371	RH	2009-12-04	29.9872	-31.2432	15	1207	2.23545	-161.477	1	2
371W11	AU371	RH	2009-12-04	29.9894	-31.244	17	1215	2.49235	146.043	1	2
371W11	AU371	RH	2009-12-04	29.9892	-31.2437	17	1213	7.64922	-55.4771	1	2
371W11	AU371	RH	2009-12-04	29.9869	-31.2431	15	1203	9.04867	-23.5615	1	2
371W11	AU371	RH	2009-12-04	29.9894	-31.244	17	1216	18.6942	62.3764	1	2
371W11	AU371	RH	2009-12-04	29.9894	-31.2438	17	1212	20.4817	-169.593	1	2
371W11	AU371	RH	2009-12-04	29.9871	-31.2431	15	1206	24.6168	43.4495	1	2
371W11	AU371	RH	2009-12-04	29.9868	-31.2431	15	1205	27.1077	-26.1214	1	2
371W11	AU371	RH	2009-12-04	29.9891	-31.2437	17	1211	34.7005	-7.83663	1	2
371W11	AU371	RH	2009-12-04	29.9891	-31.2438	17	1214	40.8536	-106.021	1	2
371W11	AU371	RH	2009-12-04	29.9872	-31.2432	15	1209	53.0401	113.101	1	2
371W11	AU371	RH	2009-12-04	29.9873	-31.2434	15	1202	58.8145	-95.2728	1	2
371W11	AU371	RH	2009-12-04	29.9867	-31.244	15	1201	96.2143	-12.2195	1	2
371W11	AU371	RH	2009-12-03	29.9858	-31.2445	15	1200	116.105	-999	1	2
371W11	AU371	RH	2009-12-04	29.9877	-31.2434	15	1210	148.059	-4.67639	1	2
371W11	AU371	RH	2009-12-04	30.0076	-31.2459	17	1219	688.215	26.3568	1	2
371W11	AU371	RH	2009-12-04	29.9894	-31.2438	17	1217	952.742	109.995	1	2
371W11	AU371	RH	2009-12-04	29.9986	-31.2436	17	1218	971.843	19.1136	1	2
371W11	AU371	RH	2009-12-04	30.0124	-31.2498	17	1220	2451.55	-23.7091	1	2
371W12	AU371	RH	2009-12-08	30.0143	-31.2757	3	1414	0.750857	7.83018	1	2
371W12	AU371	RH	2009-12-08	30.0143	-31.2757	3	1413	1.45842	173.697	1	2
371W12	AU371	RH	2009-12-08	30.0143	-31.2757	3	1412	2.48478	83.8667	1	2
371W12	AU371	RH	2009-12-08	30.0238	-31.276	55	1401	2.99817	-999	1	2
371W12	AU371	RH	2009-12-08	30.0143	-31.2757	3	1411	3.42192	-21.7045	1	2
371W12	AU371	RH	2009-12-08	30.0143	-31.2758	3	1410	4.47	177.152	1	2
371W12	AU371	RH	2009-12-08	30.0238	-31.2761	55	1402	4.9103	141.319	1	2
371W12	AU371	RH	2009-12-08	30.0149	-31.2742	17	1418	5.82911	127.961	1	2
371W12	AU371	RH	2009-12-08	30.0238	-31.276	55	1403	6.11696	-160.886	1	2
371W12	AU371	RH	2009-12-08	30.015	-31.2742	17	1419	12.7056	-169.662	1	2
371W12	AU371	RH	2009-12-08	30.0238	-31.2761	55	1404	29.4158	-32.6244	1	2
371W12	AU371	RH	2009-12-08	30.0153	-31.2743	17	1417	45.2506	-163.324	1	2
371W12	AU371	RH	2009-12-08	30.0147	-31.2743	17	1416	62.1012	80.439	1	2
371W12	AU371	RH	2009-12-08	30.0139	-31.2747	3	1408	63.6799	10.4656	1	2
371W12	AU371	RH	2009-12-08	30.0147	-31.2742	17	1406	73.8992	5.61668	1	2
371W12	AU371	RH	2009-12-08	30.0137	-31.2752	3	1409	88.7724	-61.5564	1	2
371W12	AU371	RH	2009-12-08	30.014	-31.274	17	1407	89.5566	-104.46	1	2
371W12	AU371	RH	2009-12-08	30.0143	-31.2757	3	1415	177.806	179.253	1	2
371W12	AU371	RH	2009-12-08	30.0238	-31.2763	55	1405	972.818	101.438	1	2
371W13	AU371	RH	2009-12-12	30.0178	-31.2736	17	1614	2.32393	-72.1549	2	1
371W13	AU371	RH	2009-12-12	30.0183	-31.2727	17	1611	3.30702	22.5075	2	1
371W13	AU371	RH	2009-12-12	30.0178	-31.2736	17	1615	3.551	137.547	2	1
371W13	AU371	RH	2009-12-12	30.0184	-31.2727	17	1609	4.43076	64.6338	2	1
371W13	AU371	RH	2009-12-12	30.0178	-31.2736	17	1613	4.57512	-55.2015	2	1
371W13	AU371	RH	2009-12-12	30.0184	-31.2728	17	1608	7.88824	-127.23	2	1
371W13	AU371	RH	2009-12-12	30.0174	-31.2736	17	1619	9.96591	59.8716	2	1
371W13	AU371	RH	2009-12-12	30.0191	-31.2734	17	1602	10.6985	-27.7191	2	1
371W13	AU371	RH	2009-12-12	30.0183	-31.2727	17	1607	11.8976	-111.467	2	1
371W13	AU371	RH	2009-12-12	30.0184	-31.2727	17	1610	13.2002	-169.614	2	1
371W13	AU371	RH	2009-12-12	30.019	-31.2724	17	1605	16.2099	-79.21	2	1
371W13	AU371	RH	2009-12-12	30.019	-31.2734	17	1603	20.5112	37.7663	2	1
371W13	AU371	RH	2009-12-12	30.0178	-31.2737	17	1616	27.9031	59.3511	2	1
371W13	AU371	RH	2009-12-12	30.0172	-31.2734	17	1618	36.8027	-168.776	2	1
371W13	AU371	RH	2009-12-12	30.0175	-31.2736	17	1617	43.7852	31.4595	2	1
371W13	AU371	RH	2009-12-12	30.0216	-31.2744	17	1600	55.9841	-999	2	1
371W13	AU371	RH	2009-12-12	30.0189	-31.2723	17	1606	76.9447	-59.2464	2	1
371W13	AU371	RH	2009-12-12	30.0183	-31.2727	17	1612	117.075	-64.595	2	1
371W13	AU371	RH	2009-12-12	30.0188	-31.2734	17	1604	123.617	76.8496	2	1
371W13	AU371	RH	2009-12-12	30.0216	-31.2739	17	1601	269.213	-79.3897	2	1
371W14	AU371	RH	2009-12-16	30.0128	-31.2718	17	1801	1.09751	-159.06	2	1
371W14	AU371	RH	2009-12-16	30.0127	-31.2718	17	1803	1.92139	-126.628	2	1
371W14	AU371	RH	2009-12-16	30.0128	-31.2718	17	1800	2.09197	-999	2	1
371W14	AU371	RH	2009-12-16	30.0128	-31.2718	17	1802	3.45097	100.007	2	1
371W14	AU371	RH	2009-12-16	30.0086	-31.2781	3	1806	4.37898	116.55	2	1
371W14	AU371	RH	2009-12-16	30.0087	-31.2781	3	1808	6.74686	150.953	2	1
371W14	AU371	RH	2009-12-16	30.0086	-31.2781	3	1807	6.78512	132.648	2	1
371W14	AU371	RH	2009-12-16	30.0086	-31.2781	3	1809	9.01374	-92.0462	2	1
371W14	AU371	RH	2009-12-16	30.0086	-31.2782	3	1810	9.63104	160.414	2	1
371W14	AU371	RH	2009-12-16	30.0086	-31.2781	3	1811	11.0106	164.895	2	1
371W14	AU371	RH	2009-12-16	30.0128	-31.2718	17	1804	40.332	112.703	2	1
371W14	AU371	RH	2009-12-16	30.0207	-31.275	17	1817	47.8202	-22.1918	2	1
371W14	AU371	RH	2009-12-16	30.0196	-31.2752	17	1819	75.0935	89.0114	2	1
371W14	AU371	RH	2009-12-16	30.0104	-31.2764	3	1813	106.697	37.4588	2	1
371W14	AU371	RH	2009-12-16	30.0209	-31.2746	17	1818	152.038	-140.668	2	1
371W14	AU371	RH	2009-12-16	30.019	-31.2767	3	1816	271.61	-42.2178	2	1
371W14	AU371	RH	2009-12-16	30.0087	-31.2782	3	1812	273.456	-82.5956	2	1
371W14	AU371	RH	2009-12-16	30.016	-31.277	3	1815	313.692	-16.7097	2	1
371W14	AU371	RH	2009-12-16	30.0114	-31.2763	3	1814	485.885	22.8083	2	1
371W14	AU371	RH	2009-12-16	30.0125	-31.2721	17	1805	830.739	-8.25162	2	1
371W15	AU371	RH	2009-12-20	30.0108	-31.2801	3	2002	0.750825	-17.7027	3	2
371W15	AU371	RH	2009-12-20	30.0166	-31.2811	55	2011	1.14487	-122.788	3	2
371W15	AU371	RH	2009-12-20	30.0166	-31.2811	55	2016	1.52461	35.896	3	2
371W15	AU371	RH	2009-12-20	30.0108	-31.2801	3	2003	2.1371	32.8408	3	2
371W15	AU371	RH	2009-12-20	30.0166	-31.2811	55	2013	4.62722	-127.087	3	2
371W15	AU371	RH	2009-12-20	30.0167	-31.2811	55	2010	5.26996	-134.073	3	2
371W15	AU371	RH	2009-12-20	30.0108	-31.28	3	2001	6.86048	-999	3	2
371W15	AU371	RH	2009-12-21	30.0174	-31.2817	55	2018	10.1122	-84.1469	3	2
371W15	AU371	RH	2009-12-20	30.0166	-31.2811	55	2014	10.4061	12.3437	3	2
371W15	AU371	RH	2009-12-20	30.0166	-31.2812	55	2012	11.0299	-169.219	3	2
371W15	AU371	RH	2009-12-20	30.0165	-31.2812	55	2015	14.5193	172.454	3	2
371W15	AU371	RH	2009-12-21	30.0175	-31.2817	55	2019	14.7767	-68.316	3	2
371W15	AU371	RH	2009-12-20	30.0138	-31.282	3	2006	17.3639	73.4879	3	2
371W15	AU371	RH	2009-12-20	30.0152	-31.2825	55	2008	65.6041	-65.8392	3	2
371W15	AU371	RH	2009-12-20	30.0131	-31.2814	3	2005	98.569	9.20294	3	2
371W15	AU371	RH	2009-12-21	30.0166	-31.2811	55	2017	114.251	61.6765	3	2
371W15	AU371	RH	2009-12-20	30.0137	-31.2821	3	2007	157.334	-96.7838	3	2
371W15	AU371	RH	2009-12-20	30.0156	-31.2821	55	2009	161.929	0.948649	3	2
371W15	AU371	RH	2009-12-20	30.0108	-31.2801	3	2004	287.139	-73.8047	3	2
371W16	AU371	RH	2009-12-24	30.0013	-31.27	23	2200	1.87617	-999	3	2
371W16	AU371	RH	2009-12-25	30.0014	-31.2687	17	2217	1.99525	124.139	3	2
371W16	AU371	RH	2009-12-25	30.0015	-31.2685	17	2213	2.98215	123.192	3	2
371W16	AU371	RH	2009-12-25	30.0014	-31.2687	17	2215	3.08153	105.654	3	2
371W16	AU371	RH	2009-12-24	30.0014	-31.2687	17	2207	3.31558	67.5457	3	2
371W16	AU371	RH	2009-12-25	30.0014	-31.2686	17	2216	4.01987	166.773	3	2
371W16	AU371	RH	2009-12-24	30.0014	-31.2687	17	2208	5.00113	-84.6454	3	2
371W16	AU371	RH	2009-12-25	30.0015	-31.2685	17	2212	10.0625	-13.4081	3	2
371W16	AU371	RH	2009-12-24	30.0014	-31.2687	17	2205	10.3984	67.6827	3	2
371W16	AU371	RH	2009-12-25	30.0014	-31.2686	17	2209	11.8199	-104.186	3	2
371W16	AU371	RH	2009-12-24	30.0013	-31.2688	17	2206	14.5324	175.499	3	2
371W16	AU371	RH	2009-12-24	30.001	-31.2684	17	2203	15.9145	148.861	3	2
371W16	AU371	RH	2009-12-25	30.0015	-31.2685	17	2214	19.7668	-71.7809	3	2
371W16	AU371	RH	2009-12-24	30.0012	-31.2685	17	2202	28.8611	-41.5306	3	2
371W16	AU371	RH	2009-12-24	30.0011	-31.2684	17	2204	47.1808	42.1002	3	2
371W16	AU371	RH	2009-12-25	30.0014	-31.268	17	2211	52.3559	166.458	3	2
371W16	AU371	RH	2009-12-25	30.0013	-31.2686	17	2210	76.4906	102.436	3	2
371W16	AU371	RH	2009-12-25	30.0018	-31.2676	17	2219	100.114	45.9217	3	2
371W16	AU371	RH	2009-12-25	30.0014	-31.2687	17	2218	135.926	130.568	3	2
371W16	AU371	RH	2009-12-24	30.0013	-31.27	23	2201	173.096	-32.1414	3	2
371W17	AU371	RH	2009-12-29	30.0005	-31.2722	23	2408	1.92125	-134.59	3	1
371W17	AU371	RH	2009-12-29	30.0005	-31.2724	23	2401	2.85382	-70.2929	3	1
371W17	AU371	RH	2009-12-29	30.0001	-31.2733	23	2416	3.00316	-91.1886	3	1
371W17	AU371	RH	2009-12-29	30.0005	-31.2722	23	2403	3.2589	141.327	3	1
371W17	AU371	RH	2009-12-29	30.0001	-31.2733	23	2417	3.58524	2.64691	3	1
371W17	AU371	RH	2009-12-29	30.0001	-31.2733	23	2418	4.56939	-179.739	3	1
371W17	AU371	RH	2009-12-29	30.0004	-31.2722	23	2407	5.97821	43.0345	3	1
371W17	AU371	RH	2009-12-29	30.0005	-31.2723	23	2404	6.25927	47.4573	3	1
371W17	AU371	RH	2009-12-28	30.0005	-31.2722	23	2400	17.4433	-999	3	1
371W17	AU371	RH	2009-12-29	30.0005	-31.2724	23	2402	18.844	-129.918	3	1
371W17	AU371	RH	2009-12-29	30.0005	-31.2723	23	2405	22.0389	14.1137	3	1
371W17	AU371	RH	2009-12-29	30.0005	-31.2725	23	2406	31.3533	164.362	3	1
371W17	AU371	RH	2009-12-29	30.0002	-31.272	23	2411	45.9204	-19.4996	3	1
371W17	AU371	RH	2009-12-29	30.0001	-31.2733	23	2419	49.9787	121.449	3	1
371W17	AU371	RH	2009-12-29	29.9998	-31.2717	23	2410	49.997	176.005	3	1
371W17	AU371	RH	2009-12-29	30.0008	-31.2731	23	2415	75.8798	-161.561	3	1
371W17	AU371	RH	2009-12-29	30.0005	-31.2722	23	2409	90.5076	52.0998	3	1
371W17	AU371	RH	2009-12-29	30.0004	-31.2734	23	2413	122.526	49.5797	3	1
371W17	AU371	RH	2009-12-29	30.0006	-31.2721	23	2412	158.212	83.3683	3	1
371W17	AU371	RH	2009-12-29	29.9994	-31.2739	23	2414	173.435	179.724	3	1
371W18	AU371	RH	2010-01-02	30.0117	-31.2802	3	2611	1.42688	53.9746	3	2
371W18	AU371	RH	2010-01-02	30.0224	-31.275	17	2601	1.97649	99.3858	3	2
371W18	AU371	RH	2010-01-02	30.0116	-31.2802	3	2612	2.15437	108.865	3	2
371W18	AU371	RH	2010-01-02	30.0118	-31.2803	3	2617	2.91427	-41.7684	3	2
371W18	AU371	RH	2010-01-02	30.0117	-31.2802	3	2614	3.86079	154.717	3	2
371W18	AU371	RH	2010-01-02	30.0224	-31.2751	17	2600	4.6036	-999	3	2
371W18	AU371	RH	2010-01-02	30.012	-31.2804	3	2619	5.37857	151.109	3	2
371W18	AU371	RH	2010-01-02	30.0117	-31.2802	3	2613	5.88052	12.0641	3	2
371W18	AU371	RH	2010-01-02	30.0117	-31.2802	3	2615	9.35613	35.394	3	2
371W18	AU371	RH	2010-01-02	30.0217	-31.2779	55	2606	10.5413	147.871	3	2
371W18	AU371	RH	2010-01-02	30.0118	-31.2803	3	2618	18.446	43.1237	3	2
371W18	AU371	RH	2010-01-02	30.0116	-31.2803	3	2616	23.3671	-125.778	3	2
371W18	AU371	RH	2010-01-02	30.0236	-31.2771	55	2604	64.4312	148.934	3	2
371W18	AU371	RH	2010-01-02	30.0158	-31.2784	3	2609	68.3453	29.029	3	2
371W18	AU371	RH	2010-01-02	30.0224	-31.275	17	2602	137.714	38.3647	3	2
371W18	AU371	RH	2010-01-02	30.0228	-31.2761	55	2603	142.228	-16.6128	3	2
371W18	AU371	RH	2010-01-02	30.0231	-31.2769	55	2605	194.117	-65.2586	3	2
371W18	AU371	RH	2010-01-02	30.0217	-31.2779	55	2607	307.254	-123.996	3	2
371W18	AU371	RH	2010-01-02	30.0188	-31.2786	55	2608	314.879	21.3977	3	2
371W18	AU371	RH	2010-01-02	30.0153	-31.2781	3	2610	450.004	-67.2184	3	2
371W19	AU371	RH	2010-01-06	29.9842	-31.2801	17	2812	0.956344	2.91221	2	1
371W19	AU371	RH	2010-01-06	29.9834	-31.2843	17	2802	2.52564	107.614	2	1
371W19	AU371	RH	2010-01-06	29.9841	-31.2802	17	2816	3.23437	133.68	2	1
371W19	AU371	RH	2010-01-06	29.9834	-31.2843	17	2804	3.41883	-155.027	2	1
371W19	AU371	RH	2010-01-06	29.9841	-31.2801	17	2813	3.66142	-110.457	2	1
371W19	AU371	RH	2010-01-06	29.9834	-31.2843	17	2803	3.92568	-169.018	2	1
371W19	AU371	RH	2010-01-06	29.9841	-31.2802	17	2814	5.33512	-118.148	2	1
371W19	AU371	RH	2010-01-06	29.9835	-31.2843	17	2806	10.2043	-76.4897	2	1
371W19	AU371	RH	2010-01-06	29.9842	-31.2802	17	2811	10.2304	-87.0942	2	1
371W19	AU371	RH	2010-01-06	29.9842	-31.2801	17	2815	11.2842	-170.183	2	1
371W19	AU371	RH	2010-01-06	29.9834	-31.2843	17	2805	12.306	162.892	2	1
371W19	AU371	RH	2010-01-06	29.9833	-31.2842	17	2801	22.8781	-90.151	2	1
371W19	AU371	RH	2010-01-06	29.9841	-31.2801	17	2817	26.1407	-162.499	2	1
371W19	AU371	RH	2010-01-06	29.9836	-31.2811	17	2819	51.6563	-64.2397	2	1
371W19	AU371	RH	2010-01-06	29.9841	-31.2804	17	2809	75.3158	-165.952	2	1
371W19	AU371	RH	2010-01-06	29.9839	-31.2803	17	2818	98.6024	-36.6022	2	1
371W19	AU371	RH	2010-01-06	29.9838	-31.281	17	2810	106.844	177.207	2	1
371W19	AU371	RH	2010-01-06	29.9835	-31.2843	17	2807	140.834	-25.3706	2	1
371W19	AU371	RH	2010-01-06	29.9852	-31.2833	17	2800	225.002	-999	2	1
371W19	AU371	RH	2010-01-06	29.9834	-31.2831	17	2808	330.154	17.1264	2	1
371W2	AU371	RH	2009-11-11	29.9627	-31.2262	6	103	0.317194	-22.2121	2	2
371W2	AU371	RH	2009-11-11	29.9716	-31.2502	6	114	1.13994	-103.58	2	2
371W2	AU371	RH	2009-11-11	29.9626	-31.2262	6	101	1.14016	-20.0299	2	2
371W2	AU371	RH	2009-11-11	29.9626	-31.2262	6	102	2.90326	127.929	2	2
371W2	AU371	RH	2009-11-11	29.9717	-31.25	6	119	8.2239	169.394	2	2
371W2	AU371	RH	2009-11-11	29.9717	-31.25	6	117	8.57995	168.941	2	2
371W2	AU371	RH	2009-11-11	29.9717	-31.2501	6	116	8.57998	-50.1495	2	2
371W2	AU371	RH	2009-11-11	29.9717	-31.2501	6	118	9.52658	175.534	2	2
371W2	AU371	RH	2009-11-11	29.9716	-31.2502	6	115	13.0135	-59.285	2	2
371W2	AU371	RH	2009-11-11	29.9717	-31.2501	6	113	16.9168	60.4218	2	2
371W2	AU371	RH	2009-11-11	29.9628	-31.2263	6	100	21.7772	-999	2	2
371W2	AU371	RH	2009-11-11	29.9666	-31.2293	6	106	56.7792	-69.2423	2	2
371W2	AU371	RH	2009-11-11	29.9655	-31.2288	6	105	126.399	-20.5947	2	2
371W2	AU371	RH	2009-11-11	29.971	-31.2487	22	112	176.667	20.8024	2	2
371W2	AU371	RH	2009-11-11	29.967	-31.229	6	107	234.53	129.106	2	2
371W2	AU371	RH	2009-11-11	29.9671	-31.2309	6	108	335.295	-53.5783	2	2
371W2	AU371	RH	2009-11-11	29.9627	-31.2262	6	104	429.81	96.978	2	2
371W2	AU371	RH	2009-11-11	29.9689	-31.2417	21	110	473.188	12.3554	2	2
371W2	AU371	RH	2009-11-11	29.9676	-31.2455	21	111	527.956	-59.6807	2	2
371W2	AU371	RH	2009-11-11	29.9698	-31.2325	6	109	1112.68	61.3164	2	2
371W20	AU371	RH	2010-01-10	30.0102	-31.2699	17	3018	0.861041	-122.985	2	1
371W20	AU371	RH	2010-01-10	30.0073	-31.2686	17	3006	1.0975	29.1737	2	1
371W20	AU371	RH	2010-01-10	30.0073	-31.2686	17	3005	1.16195	116.227	2	1
371W20	AU371	RH	2010-01-10	30.0102	-31.2699	17	3019	3.63926	43.0342	2	1
371W20	AU371	RH	2010-01-10	30.0077	-31.2682	17	3011	5.01044	-140.513	2	1
371W20	AU371	RH	2010-01-10	30.005	-31.2681	17	3002	5.46317	35.4818	2	1
371W20	AU371	RH	2010-01-10	30.0103	-31.2698	17	3017	11.6021	-162.534	2	1
371W20	AU371	RH	2010-01-10	30.0052	-31.2682	17	3001	15.0274	-54.2401	2	1
371W20	AU371	RH	2010-01-10	30.0077	-31.2681	17	3012	18.8371	-87.4624	2	1
371W20	AU371	RH	2010-01-10	30.0077	-31.268	17	3010	21.1103	-15.5297	2	1
371W20	AU371	RH	2010-01-10	30.0052	-31.2684	17	3000	32.3615	-999	2	1
371W20	AU371	RH	2010-01-10	30.0078	-31.2677	17	3009	37.9117	179.738	2	1
371W20	AU371	RH	2010-01-10	30.0101	-31.2702	17	3016	43.9977	-24.0113	2	1
371W20	AU371	RH	2010-01-10	30.0074	-31.2686	17	3007	45.1156	-95.545	2	1
371W20	AU371	RH	2010-01-10	30.0075	-31.2692	17	3004	72.4966	-132.825	2	1
371W20	AU371	RH	2010-01-10	30.0095	-31.2705	17	3015	75.2578	-75.2077	2	1
371W20	AU371	RH	2010-01-10	30.0076	-31.2683	17	3008	77.7357	-23.9982	2	1
371W20	AU371	RH	2010-01-10	30.0076	-31.2681	17	3013	142.021	-135.466	2	1
371W20	AU371	RH	2010-01-10	30.0078	-31.2692	17	3014	236.35	-41.3819	2	1
371W20	AU371	RH	2010-01-10	30.005	-31.2681	17	3003	291.999	137.308	2	1
371W21	AU371	RH	2010-01-14	30.0075	-31.2691	17	3215	1.24011	-131.85	3	2
371W21	AU371	RH	2010-01-14	30.0007	-31.2722	23	3202	3.61388	-108.068	3	2
371W21	AU371	RH	2010-01-14	30.0082	-31.2674	17	3210	4.27427	88.3432	3	2
371W21	AU371	RH	2010-01-14	30.0077	-31.2689	17	3213	5.87477	-149.399	3	2
371W21	AU371	RH	2010-01-14	30.0008	-31.2722	23	3201	6.0641	-9.69571	3	2
371W21	AU371	RH	2010-01-15	30.0068	-31.2686	17	3218	16.6071	23.668	3	2
371W21	AU371	RH	2010-01-14	30.0074	-31.2672	17	3208	23.4806	40.5202	3	2
371W21	AU371	RH	2010-01-14	30.001	-31.2721	23	3200	27.4599	-999	3	2
371W21	AU371	RH	2010-01-14	30.0077	-31.2688	17	3214	34.0775	-168.824	3	2
371W21	AU371	RH	2010-01-14	30.001	-31.2715	23	3205	34.6293	-8.00101	3	2
371W21	AU371	RH	2010-01-15	30.007	-31.269	17	3217	48.8703	60.9057	3	2
371W21	AU371	RH	2010-01-15	30.0075	-31.2691	17	3216	51.4183	-173.147	3	2
371W21	AU371	RH	2010-01-14	30.0082	-31.2675	17	3211	51.7275	66.3204	3	2
371W21	AU371	RH	2010-01-14	30.0015	-31.2718	23	3204	64.8452	-109.617	3	2
371W21	AU371	RH	2010-01-14	30.0076	-31.2673	17	3209	66.2665	2.15714	3	2
371W21	AU371	RH	2010-01-14	30.0008	-31.2722	23	3203	88.382	-72.3465	3	2
371W21	AU371	RH	2010-01-14	30.0077	-31.2675	17	3212	164.216	-83.1146	3	2
371W21	AU371	RH	2010-01-15	30.0068	-31.2685	17	3219	334.761	-92.2932	3	2
371W21	AU371	RH	2010-01-14	30.0007	-31.2714	23	3206	348.355	99.5447	3	2
371W21	AU371	RH	2010-01-14	30.0027	-31.269	17	3207	533.664	29.4581	3	2
371W22	AU371	RH	2010-01-19	30.0194	-31.274	17	3416	0.784912	-21.5883	2	1
371W22	AU371	RH	2010-01-18	30.0178	-31.2732	17	3404	1.44373	-139.338	2	1
371W22	AU371	RH	2010-01-19	30.0194	-31.274	17	3415	1.72211	160.441	2	1
371W22	AU371	RH	2010-01-18	30.0178	-31.2732	17	3403	1.90321	-93.8036	2	1
371W22	AU371	RH	2010-01-18	30.0178	-31.2731	17	3406	1.91321	110.125	2	1
371W22	AU371	RH	2010-01-19	30.0194	-31.2739	17	3413	2.39958	82.164	2	1
371W22	AU371	RH	2010-01-19	30.0215	-31.2739	17	3419	2.52654	179.614	2	1
371W22	AU371	RH	2010-01-19	30.0175	-31.2729	17	3410	3.39892	-56.2095	2	1
371W22	AU371	RH	2010-01-18	30.0178	-31.2732	17	3405	3.54371	-169.923	2	1
371W22	AU371	RH	2010-01-18	30.0178	-31.2731	17	3407	3.88849	-142.046	2	1
371W22	AU371	RH	2010-01-19	30.0194	-31.2739	17	3414	4.14073	-112.18	2	1
371W22	AU371	RH	2010-01-19	30.0174	-31.2729	17	3411	10.1241	150.995	2	1
371W22	AU371	RH	2010-01-18	30.0176	-31.2732	17	3402	17.0491	108.101	2	1
371W22	AU371	RH	2010-01-19	30.0178	-31.2731	17	3408	20.6571	16.677	2	1
371W22	AU371	RH	2010-01-19	30.0177	-31.2729	17	3409	29.5478	-76.6415	2	1
371W22	AU371	RH	2010-01-18	30.0194	-31.275	17	3400	71.042	-999	2	1
371W22	AU371	RH	2010-01-19	30.0205	-31.2741	17	3418	107.976	-16.3795	2	1
371W22	AU371	RH	2010-01-19	30.0194	-31.274	17	3417	114.572	-136.398	2	1
371W22	AU371	RH	2010-01-19	30.0175	-31.2728	17	3412	237.898	110.37	2	1
371W22	AU371	RH	2010-01-18	30.0196	-31.2744	17	3401	246.003	-73.4496	2	1
371W23	AU371	RH	2010-01-23	30.0381	-31.2624	7	3607	1.57788	-2.22017	3	1
371W23	AU371	RH	2010-01-23	30.0381	-31.2624	7	3606	2.44184	-123.854	3	1
371W23	AU371	RH	2010-01-23	30.0382	-31.2624	7	3605	3.1405	23.4485	3	1
371W23	AU371	RH	2010-01-23	30.0382	-31.2613	55	3615	4.10321	-14.2275	3	1
371W23	AU371	RH	2010-01-23	30.0385	-31.2621	55	3602	8.94563	-167.743	3	1
371W23	AU371	RH	2010-01-23	30.0386	-31.261	55	3612	9.04598	177.951	3	1
371W23	AU371	RH	2010-01-23	30.0381	-31.2612	55	3618	9.84013	-150.939	3	1
371W23	AU371	RH	2010-01-23	30.0386	-31.2611	55	3611	9.92101	-45.4658	3	1
371W23	AU371	RH	2010-01-23	30.0383	-31.2612	55	3614	12.2233	-48.9353	3	1
371W23	AU371	RH	2010-01-23	30.0384	-31.2625	7	3600	21.7883	-999	3	1
371W23	AU371	RH	2010-01-23	30.0381	-31.2624	7	3608	24.0383	-155.305	3	1
371W23	AU371	RH	2010-01-23	30.0384	-31.2625	7	3604	24.445	94.4671	3	1
371W23	AU371	RH	2010-01-23	30.0382	-31.2613	55	3616	24.6226	-145.872	3	1
371W23	AU371	RH	2010-01-23	30.0382	-31.2612	55	3619	27.6986	150.269	3	1
371W23	AU371	RH	2010-01-23	30.0384	-31.2612	55	3617	29.9606	-152.902	3	1
371W23	AU371	RH	2010-01-23	30.0384	-31.2624	7	3601	33.3049	15.1459	3	1
371W23	AU371	RH	2010-01-23	30.0386	-31.2611	55	3613	37.4457	73.8227	3	1
371W23	AU371	RH	2010-01-23	30.0385	-31.2622	55	3603	38.9952	-13.3467	3	1
371W23	AU371	RH	2010-01-23	30.0381	-31.2615	55	3610	66.2242	59.7774	3	1
371W23	AU371	RH	2010-01-23	30.0382	-31.2623	7	3609	96.3163	-40.5548	3	1
371W24	AU371	RH	2010-01-27	30.0324	-31.2684	17	3819	0.601615	-11.7141	1	2
371W24	AU371	RH	2010-01-27	30.0319	-31.2689	17	3808	1.14013	102.848	1	2
371W24	AU371	RH	2010-01-27	30.0319	-31.2689	17	3809	1.26342	-13.9891	1	2
371W24	AU371	RH	2010-01-27	30.0319	-31.2689	17	3811	2.04511	-20.2138	1	2
371W24	AU371	RH	2010-01-27	30.0319	-31.2689	17	3810	2.60469	-134.727	1	2
371W24	AU371	RH	2010-01-27	30.0323	-31.2684	17	3816	3.00379	-38.3385	1	2
371W24	AU371	RH	2010-01-27	30.0319	-31.2689	17	3807	3.93812	50.9261	1	2
371W24	AU371	RH	2010-01-27	30.0314	-31.2708	55	3800	4.15608	-999	1	2
371W24	AU371	RH	2010-01-27	30.0319	-31.2689	17	3806	7.25685	114.547	1	2
371W24	AU371	RH	2010-01-27	30.0323	-31.2684	17	3815	9.23755	11.8715	1	2
371W24	AU371	RH	2010-01-27	30.0323	-31.2683	17	3817	11.9024	92.5326	1	2
371W24	AU371	RH	2010-01-27	30.0318	-31.269	17	3805	13.5969	22.5004	1	2
371W24	AU371	RH	2010-01-27	30.0323	-31.2685	17	3814	14.1947	-38.6776	1	2
371W24	AU371	RH	2010-01-27	30.0324	-31.2683	17	3818	14.2544	115.16	1	2
371W24	AU371	RH	2010-01-27	30.0319	-31.269	17	3812	15.3282	-139.292	1	2
371W24	AU371	RH	2010-01-27	30.0315	-31.2708	55	3801	30.2047	8.37353	1	2
371W24	AU371	RH	2010-01-27	30.0318	-31.2693	55	3804	47.1696	-8.13227	1	2
371W24	AU371	RH	2010-01-27	30.0319	-31.2688	17	3813	53.55	62.4198	1	2
371W24	AU371	RH	2010-01-27	30.0317	-31.2707	55	3802	81.4424	-66.9817	1	2
371W24	AU371	RH	2010-01-27	30.0316	-31.27	55	3803	82.1341	20.4499	1	2
371W25	AU371	RH	2010-01-31	30.0384	-31.2636	55	3992	0.66527	100.326	1	2
371W25	AU371	RH	2010-01-31	30.0383	-31.2636	55	3993	1.50198	127.187	1	2
371W25	AU371	RH	2010-01-31	30.0383	-31.2636	55	3991	1.97644	-157.459	1	2
371W25	AU371	RH	2010-01-31	30.0324	-31.2684	17	4008	2.04516	-148.563	1	2
371W25	AU371	RH	2010-01-31	30.0322	-31.2681	17	4005	2.91176	-87.676	1	2
371W25	AU371	RH	2010-01-31	30.0344	-31.2659	55	3999	2.93393	3.9066	1	2
371W25	AU371	RH	2010-01-31	30.0324	-31.2684	17	4007	3.77753	55.8753	1	2
371W25	AU371	RH	2010-01-31	30.0336	-31.2671	17	4001	5.18239	81.7172	1	2
371W25	AU371	RH	2010-01-31	30.0384	-31.2637	55	3990	12.5097	-999	1	2
371W25	AU371	RH	2010-01-31	30.0384	-31.2636	55	3994	29.9222	109.406	1	2
371W25	AU371	RH	2010-01-31	30.0322	-31.2681	17	4006	40.0442	-3.55268	1	2
371W25	AU371	RH	2010-01-31	30.0349	-31.2658	55	3998	44.2996	24.781	1	2
371W25	AU371	RH	2010-01-31	30.0326	-31.2678	17	4004	54.3092	23.5289	1	2
371W25	AU371	RH	2010-01-31	30.0386	-31.2637	55	3995	58.0209	92.0255	1	2
371W25	AU371	RH	2010-01-31	30.0324	-31.2684	17	4009	61.1678	-151.99	1	2
371W25	AU371	RH	2010-01-31	30.0336	-31.2671	17	4002	68.2672	-47.0899	1	2
371W25	AU371	RH	2010-01-31	30.033	-31.2673	17	4003	71.9945	-28.9428	1	2
371W25	AU371	RH	2010-01-31	30.0382	-31.2641	55	3996	157.112	36.8576	1	2
371W25	AU371	RH	2010-01-31	30.0344	-31.2659	55	4000	167.436	-51.8939	1	2
371W25	AU371	RH	2010-01-31	30.0368	-31.2645	55	3997	252.171	-22.3998	1	2
371W26	AU371	RH	2010-02-04	30.0001	-31.2468	17	4205	0.785609	-52.5932	1	1
371W26	AU371	RH	2010-02-04	30.0002	-31.2467	17	4203	1.25485	-139.57	1	1
371W26	AU371	RH	2010-02-04	30.0006	-31.2436	15	4194	2.09178	-138.274	1	1
371W26	AU371	RH	2010-02-04	30.0002	-31.2437	15	4197	2.09501	168.142	1	1
371W26	AU371	RH	2010-02-04	30.0002	-31.2467	17	4202	4.00354	123.106	1	1
371W26	AU371	RH	2010-02-04	30.0002	-31.2437	15	4196	6.47063	144.507	1	1
371W26	AU371	RH	2010-02-04	30.0006	-31.2436	15	4193	6.64576	-55.5192	1	1
371W26	AU371	RH	2010-02-04	30.0002	-31.2436	15	4199	9.9701	-84.4616	1	1
371W26	AU371	RH	2010-02-04	30.0002	-31.2437	15	4198	11.068	156.751	1	1
371W26	AU371	RH	2010-02-04	30.0002	-31.2467	17	4204	11.1791	-18.5029	1	1
371W26	AU371	RH	2010-02-04	30.0003	-31.248	17	4209	16.582	-31.8085	1	1
371W26	AU371	RH	2010-02-04	30.0001	-31.2477	17	4207	22.3259	14.6927	1	1
371W26	AU371	RH	2010-02-04	30.0001	-31.2478	17	4208	32.5671	-69.3334	1	1
371W26	AU371	RH	2010-02-04	30.0003	-31.2438	15	4192	38.5005	-36.5804	1	1
371W26	AU371	RH	2010-02-04	30.0006	-31.2436	15	4195	42.7411	34.2293	1	1
371W26	AU371	RH	2010-02-04	30	-31.2444	15	4190	98.8792	-999	1	1
371W26	AU371	RH	2010-02-04	30.0001	-31.2468	17	4206	106.956	23.858	1	1
371W26	AU371	RH	2010-02-04	29.9993	-31.2439	15	4191	108.092	137.047	1	1
371W26	AU371	RH	2010-02-04	30.0024	-31.2458	17	4201	246.731	104.753	1	1
371W26	AU371	RH	2010-02-04	30.0001	-31.2436	15	4200	352.815	-135.979	1	1
371W27	AU371	RH	2010-02-08	30.0386	-31.2625	7	4413	1.10252	171.957	1	2
371W27	AU371	RH	2010-02-08	30.0354	-31.2639	55	4409	1.56906	-100.38	1	2
371W27	AU371	RH	2010-02-09	30.0387	-31.2627	7	4415	1.80383	64.517	1	2
371W27	AU371	RH	2010-02-08	30.0353	-31.2639	55	4408	4.71436	-40.3193	1	2
371W27	AU371	RH	2010-02-09	30.0386	-31.2624	7	4419	6.22324	11.7902	1	2
371W27	AU371	RH	2010-02-09	30.0386	-31.2627	7	4417	7.9943	-167.846	1	2
371W27	AU371	RH	2010-02-09	30.0386	-31.2627	7	4416	9.62222	107.749	1	2
371W27	AU371	RH	2010-02-08	30.0351	-31.264	55	4406	17.3519	-119.604	1	2
371W27	AU371	RH	2010-02-09	30.0385	-31.2626	7	4421	23.4825	144.393	1	2
371W27	AU371	RH	2010-02-08	30.0386	-31.2625	7	4414	24.9557	-27.1675	1	2
371W27	AU371	RH	2010-02-09	30.0386	-31.2624	7	4420	25.2051	-156.225	1	2
371W27	AU371	RH	2010-02-09	30.0386	-31.2626	7	4423	26.0848	-176.892	1	2
371W27	AU371	RH	2010-02-09	30.0385	-31.2624	7	4422	29.3114	163.765	1	2
371W27	AU371	RH	2010-02-08	30.0385	-31.2628	7	4412	29.753	-38.0245	1	2
371W27	AU371	RH	2010-02-09	30.0386	-31.2627	7	4418	37.2097	-170.289	1	2
371W27	AU371	RH	2010-02-08	30.0346	-31.2662	55	4404	41.7181	-999	1	2
371W27	AU371	RH	2010-02-08	30.035	-31.2641	55	4407	42.9387	175.426	1	2
371W27	AU371	RH	2010-02-08	30.0353	-31.2639	55	4410	80.9987	-168.117	1	2
371W27	AU371	RH	2010-02-08	30.035	-31.2662	55	4405	264.425	-83.1597	1	2
371W27	AU371	RH	2010-02-08	30.0361	-31.2641	55	4411	298.816	-53.8274	1	2
371W28	AU371	RH	2010-02-13	30.0365	-31.2653	55	4615	0.861233	41.9569	3	1
371W28	AU371	RH	2010-02-12	30.0302	-31.2675	17	4602	1.46689	166.182	3	1
371W28	AU371	RH	2010-02-13	30.0365	-31.2653	55	4613	1.48976	-97.1118	3	1
371W28	AU371	RH	2010-02-13	30.0358	-31.2659	55	4610	2.25292	-123.357	3	1
371W28	AU371	RH	2010-02-13	30.0365	-31.2653	55	4614	2.54888	81.5649	3	1
371W28	AU371	RH	2010-02-13	30.0358	-31.2658	55	4611	4.09108	164.021	3	1
371W28	AU371	RH	2010-02-13	30.0365	-31.2653	55	4616	4.37498	145.864	3	1
371W28	AU371	RH	2010-02-12	30.0303	-31.2675	17	4600	5.95883	-999	3	1
371W28	AU371	RH	2010-02-12	30.0302	-31.2675	17	4601	7.31258	63.5114	3	1
371W28	AU371	RH	2010-02-13	30.0357	-31.2658	55	4609	9.35891	-164.212	3	1
371W28	AU371	RH	2010-02-13	30.0358	-31.2658	55	4608	9.7978	128.212	3	1
371W28	AU371	RH	2010-02-12	30.0359	-31.2655	55	4606	13.4084	-101.532	3	1
371W28	AU371	RH	2010-02-12	30.0357	-31.2656	55	4605	18.6935	-16.893	3	1
371W28	AU371	RH	2010-02-13	30.0385	-31.2637	55	4619	28.0928	23.7164	3	1
371W28	AU371	RH	2010-02-13	30.0358	-31.2655	55	4607	45.7551	-129.091	3	1
371W28	AU371	RH	2010-02-13	30.0381	-31.2644	55	4618	95.0261	-28.4421	3	1
371W28	AU371	RH	2010-02-13	30.0358	-31.2659	55	4612	96.1063	-132.637	3	1
371W28	AU371	RH	2010-02-12	30.0302	-31.2675	17	4603	140.895	-10.3224	3	1
371W28	AU371	RH	2010-02-13	30.0365	-31.2653	55	4617	198.598	-163.306	3	1
371W28	AU371	RH	2010-02-12	30.0315	-31.2675	17	4604	488.915	-26.2651	3	1
371W29	AU371	RH	2010-02-17	30.0304	-31.2702	17	4814	1.6845	-150.202	1	2
371W29	AU371	RH	2010-02-17	30.0305	-31.2702	17	4816	2.8456	-121.24	1	2
371W29	AU371	RH	2010-02-17	30.0304	-31.2702	17	4815	5.6071	-115.416	1	2
371W29	AU371	RH	2010-02-17	30.0304	-31.2703	17	4813	6.23937	70.6648	1	2
371W29	AU371	RH	2010-02-17	30.0304	-31.2702	17	4817	7.42714	65.461	1	2
371W29	AU371	RH	2010-02-17	30.0306	-31.2693	17	4803	7.97298	-94.4643	1	2
371W29	AU371	RH	2010-02-17	30.0308	-31.2711	55	4806	9.1817	-3.15076	1	2
371W29	AU371	RH	2010-02-17	30.0307	-31.2694	17	4804	12.7608	84.6837	1	2
371W29	AU371	RH	2010-02-17	30.0306	-31.2702	55	4812	15.2399	-34.7552	1	2
371W29	AU371	RH	2010-02-17	30.0306	-31.2691	17	4802	26.2401	-172.898	1	2
371W29	AU371	RH	2010-02-17	30.031	-31.2717	55	4808	41.2126	-157.985	1	2
371W29	AU371	RH	2010-02-17	30.0305	-31.2701	17	4818	44.6221	-132.549	1	2
371W29	AU371	RH	2010-02-17	30.0311	-31.2704	55	4811	59.0788	6.35753	1	2
371W29	AU371	RH	2010-02-17	30.0308	-31.2711	55	4807	67.5391	-20.0103	1	2
371W29	AU371	RH	2010-02-17	30.0318	-31.2706	55	4810	74.6313	-116.688	1	2
371W29	AU371	RH	2010-02-17	30.0306	-31.2699	17	4801	93.6198	-46.81	1	2
371W29	AU371	RH	2010-02-17	30.031	-31.2713	55	4809	115.8	47.7844	1	2
371W29	AU371	RH	2010-02-17	30.0301	-31.2703	17	4819	145.304	10.0119	1	2
371W29	AU371	RH	2010-02-17	30.0307	-31.2695	17	4805	193.958	-0.158523	1	2
371W29	AU371	RH	2010-02-17	30.0278	-31.2721	17	4800	397.277	-999	1	2
371W3	AU371	RH	2009-11-13	30.0233	-31.2677	17	215	0.76245	173.306	2	1
371W3	AU371	RH	2009-11-13	30.034	-31.2661	17	201	1.45862	158.349	2	1
371W3	AU371	RH	2009-11-13	30.032	-31.2681	17	206	2.29013	-52.6432	2	1
371W3	AU371	RH	2009-11-13	30.0221	-31.2678	17	218	3.45122	85.8671	2	1
371W3	AU371	RH	2009-11-13	30.0221	-31.2677	17	219	3.52856	169.647	2	1
371W3	AU371	RH	2009-11-13	30.034	-31.266	17	200	4.15981	-999	2	1
371W3	AU371	RH	2009-11-13	30.0267	-31.2669	17	212	5.2245	-120.214	2	1
371W3	AU371	RH	2009-11-13	30.0267	-31.267	17	211	14.5106	75.6486	2	1
371W3	AU371	RH	2009-11-13	30.0322	-31.2681	17	205	18.1454	-2.00064	2	1
371W3	AU371	RH	2009-11-13	30.0223	-31.2676	17	217	25.0055	-50.7655	2	1
371W3	AU371	RH	2009-11-13	30.0332	-31.2677	55	203	42.6972	9.28849	2	1
371W3	AU371	RH	2009-11-13	30.0314	-31.2686	17	208	49.4084	3.78035	2	1
371W3	AU371	RH	2009-11-13	30.0311	-31.2688	17	209	56.3849	126.343	2	1
371W3	AU371	RH	2009-11-13	30.032	-31.2681	17	207	78.9436	14.1425	2	1
371W3	AU371	RH	2009-11-13	30.033	-31.2681	55	204	83.3912	56.0717	2	1
371W3	AU371	RH	2009-11-13	30.0266	-31.2669	17	213	99.0979	-0.50395	2	1
371W3	AU371	RH	2009-11-13	30.0233	-31.2677	17	216	100.781	-157.838	2	1
371W3	AU371	RH	2009-11-13	30.034	-31.266	17	202	221.124	-166.073	2	1
371W3	AU371	RH	2009-11-13	30.0258	-31.2672	17	214	263.347	13.2891	2	1
371W3	AU371	RH	2009-11-13	30.031	-31.2684	17	210	483.413	-66.9869	2	1
371W30	AU371	RH	2010-02-21	29.9996	-31.2434	15	5010	1.61722	-172.884	1	2
371W30	AU371	RH	2010-02-21	29.9995	-31.2434	15	5009	1.73801	-48.0079	1	2
371W30	AU371	RH	2010-02-21	29.9996	-31.2434	15	5015	2.28046	78.3708	1	2
371W30	AU371	RH	2010-02-21	29.9996	-31.2434	15	5016	2.53484	119.642	1	2
371W30	AU371	RH	2010-02-21	29.9996	-31.2434	15	5014	3.58547	-166.933	1	2
371W30	AU371	RH	2010-02-21	29.9996	-31.2434	15	5012	4.18498	-160.951	1	2
371W30	AU371	RH	2010-02-21	29.9996	-31.2434	15	5013	6.04407	-96.2219	1	2
371W30	AU371	RH	2010-02-21	29.9995	-31.2434	15	5008	6.29614	-70.3517	1	2
371W30	AU371	RH	2010-02-21	29.9995	-31.2434	15	5011	8.94087	167.281	1	2
371W30	AU371	RH	2010-02-21	29.9993	-31.2434	15	5019	18.8069	-74.5841	1	2
371W30	AU371	RH	2010-02-21	29.9995	-31.2433	15	5018	20.419	-94.3075	1	2
371W30	AU371	RH	2010-02-21	29.9996	-31.2434	15	5017	24.2575	142.266	1	2
371W30	AU371	RH	2010-02-21	29.9987	-31.2428	15	5005	38.8718	-128.385	1	2
371W30	AU371	RH	2010-02-21	29.9987	-31.2424	15	5006	72.5158	108.202	1	2
371W30	AU371	RH	2010-02-21	29.9982	-31.2424	15	5004	72.9971	43.7644	1	2
371W30	AU371	RH	2010-02-21	29.9868	-31.2443	15	5001	88.4498	35.1197	1	2
371W30	AU371	RH	2010-02-21	29.9994	-31.2426	15	5007	97.9801	68.0562	1	2
371W30	AU371	RH	2010-02-21	29.9865	-31.2452	15	5000	107.779	-999	1	2
371W30	AU371	RH	2010-02-21	29.9875	-31.2438	15	5002	181.484	19.733	1	2
371W30	AU371	RH	2010-02-21	29.9891	-31.2433	17	5003	941.361	12.9021	1	2
371W31	AU371	RH	2010-03-01	29.9895	-31.2485	17	5407	5.55355	-138.968	3	2
371W31	AU371	RH	2010-03-01	29.9966	-31.2407	15	5417	6.25616	-139.881	3	2
371W31	AU371	RH	2010-03-01	29.9964	-31.2407	15	5416	17.4138	15.4204	3	2
371W31	AU371	RH	2010-03-01	29.9897	-31.2487	17	5406	22.8867	164.943	3	2
371W31	AU371	RH	2010-03-01	29.9896	-31.2484	17	5401	38.7167	91.8189	3	2
371W31	AU371	RH	2010-03-01	29.9895	-31.2486	17	5408	39.067	-85.4173	3	2
371W31	AU371	RH	2010-03-01	29.9894	-31.2484	17	5405	40.1774	115.775	3	2
371W31	AU371	RH	2010-03-01	29.9899	-31.2485	17	5409	50.23	-78.729	3	2
371W31	AU371	RH	2010-03-01	29.9892	-31.2482	17	5402	52.2075	175.829	3	2
371W31	AU371	RH	2010-03-01	29.9958	-31.2409	15	5415	69.3818	4.98265	3	2
371W31	AU371	RH	2010-03-01	29.9953	-31.2407	15	5419	70.8496	48.7552	3	2
371W31	AU371	RH	2010-03-01	29.9948	-31.2403	15	5420	81.7053	-50.4001	3	2
371W31	AU371	RH	2010-03-01	29.9891	-31.249	24	5404	83.0596	164.95	3	2
371W31	AU371	RH	2010-03-01	29.9897	-31.2484	17	5403	98.5637	104.139	3	2
371W31	AU371	RH	2010-03-01	29.9965	-31.2407	15	5418	129.378	-36.2555	3	2
371W31	AU371	RH	2010-03-01	29.9899	-31.2481	17	5410	131.187	38.6103	3	2
371W31	AU371	RH	2010-03-01	29.9946	-31.2415	15	5414	141.706	24.2353	3	2
371W31	AU371	RH	2010-03-01	29.9903	-31.2472	17	5400	164.705	-999	3	2
371W31	AU371	RH	2010-03-01	29.9934	-31.2428	15	5413	198.587	-9.1711	3	2
371W31	AU371	RH	2010-03-01	29.9914	-31.2444	15	5412	282.712	35.6121	3	2
371W31	AU371	RH	2010-03-01	29.9907	-31.2473	17	5411	355.735	-30.1808	3	2
371W33	AU371	RH	2010-03-18	29.9913	-31.2502	24	6211	1.03356	166.46	1	2
371W33	AU371	RH	2010-03-18	29.9913	-31.2521	24	6217	1.22059	139.227	1	2
371W33	AU371	RH	2010-03-18	29.9913	-31.2521	24	6215	1.26063	13.1404	1	2
371W33	AU371	RH	2010-03-18	29.9913	-31.2521	24	6213	1.52518	-63.0318	1	2
371W33	AU371	RH	2010-03-18	29.9913	-31.2521	24	6216	2.80754	155.952	1	2
371W33	AU371	RH	2010-03-18	29.9914	-31.2502	24	6210	3.083	-167.124	1	2
371W33	AU371	RH	2010-03-18	29.9879	-31.2421	15	6200	3.21571	-999	1	2
371W33	AU371	RH	2010-03-18	29.9913	-31.2521	24	6214	3.5574	103.686	1	2
371W33	AU371	RH	2010-03-18	29.9913	-31.2521	24	6218	10.5745	-24.106	1	2
371W33	AU371	RH	2010-03-18	29.9879	-31.2421	15	6201	12.56	-94.0752	1	2
371W33	AU371	RH	2010-03-18	29.9908	-31.2502	24	6209	62.3278	-41.7374	1	2
371W33	AU371	RH	2010-03-18	29.9902	-31.2504	24	6207	73.4193	-120.308	1	2
371W33	AU371	RH	2010-03-18	29.9901	-31.2497	24	6208	87.0572	140.656	1	2
371W33	AU371	RH	2010-03-18	29.988	-31.2422	15	6202	94.5791	43.2082	1	2
371W33	AU371	RH	2010-03-18	29.9879	-31.2499	24	6205	102.236	-81.3835	1	2
371W33	AU371	RH	2010-03-18	29.9888	-31.2499	24	6206	156.343	23.1338	1	2
371W33	AU371	RH	2010-03-18	29.9913	-31.2502	24	6212	218.152	91.2773	1	2
371W33	AU371	RH	2010-03-18	29.9914	-31.2521	24	6219	222.642	-75.1264	1	2
371W33	AU371	RH	2010-03-18	29.9872	-31.2466	17	6204	400.769	-20.5357	1	2
371W33	AU371	RH	2010-03-18	29.988	-31.243	15	6203	443.996	14.0377	1	2
371W34	AU371	RH	2010-03-26	29.9946	-31.2511	24	6604	0.826857	119.438	2	1
371W34	AU371	RH	2010-03-26	29.9946	-31.2511	24	6605	0.95669	149.803	2	1
371W34	AU371	RH	2010-03-26	29.9936	-31.2542	24	6608	4.01387	-40.8798	2	1
371W34	AU371	RH	2010-03-26	30.0052	-31.2524	24	6616	5.67796	-87.897	2	1
371W34	AU371	RH	2010-03-26	29.9962	-31.2514	24	6600	12.0764	-999	2	1
371W34	AU371	RH	2010-03-26	29.9946	-31.2511	24	6606	12.8811	-25.0726	2	1
371W34	AU371	RH	2010-03-26	29.9947	-31.2513	24	6603	28.1792	18.8651	2	1
371W34	AU371	RH	2010-03-26	30.0051	-31.2527	24	6618	32.4421	-11.7698	2	1
371W34	AU371	RH	2010-03-26	30.0048	-31.2524	24	6615	33.9733	19.1177	2	1
371W34	AU371	RH	2010-03-26	30.0052	-31.2524	24	6617	36.789	-167.027	2	1
371W34	AU371	RH	2010-03-26	30.0045	-31.2526	24	6614	38.0949	-34.0382	2	1
371W34	AU371	RH	2010-03-26	29.9961	-31.2514	24	6601	88.2147	-37.1304	2	1
371W34	AU371	RH	2010-03-26	29.9956	-31.252	24	6602	119.18	91.486	2	1
371W34	AU371	RH	2010-03-26	29.9936	-31.2542	24	6609	135.321	-97.3668	2	1
371W34	AU371	RH	2010-03-26	30.0031	-31.2524	24	6613	146.508	-17.9464	2	1
371W34	AU371	RH	2010-03-26	29.9947	-31.2536	24	6610	178.681	-19.0243	2	1
371W34	AU371	RH	2010-03-26	30.0006	-31.2514	24	6612	289.03	39.3263	2	1
371W34	AU371	RH	2010-03-26	29.9945	-31.2512	24	6607	365.273	-19.8078	2	1
371W34	AU371	RH	2010-03-26	29.9958	-31.2524	24	6611	513.165	38.5719	2	1
371W35	AU371	RH	2010-04-04	30.0041	-31.2553	24	7015	0.478354	-26.3932	2	1
371W35	AU371	RH	2010-04-04	30.0044	-31.2553	24	7009	0.634434	-82.9616	2	1
371W35	AU371	RH	2010-04-04	30.0043	-31.2553	24	7010	1.2403	-130.668	2	1
371W35	AU371	RH	2010-04-04	30.0044	-31.2553	24	7008	3.47568	-149.702	2	1
371W35	AU371	RH	2010-04-04	30.0042	-31.2553	24	7014	3.62552	0.553998	2	1
371W35	AU371	RH	2010-04-04	30.0043	-31.2553	24	7007	4.14131	-97.7459	2	1
371W35	AU371	RH	2010-04-04	30.0044	-31.2552	24	7006	9.68452	-153.764	2	1
371W35	AU371	RH	2010-04-04	30.0044	-31.2553	24	7011	11.7834	-37.04	2	1
371W35	AU371	RH	2010-04-04	30.0044	-31.2553	24	7005	16.2035	29.4804	2	1
371W35	AU371	RH	2010-04-03	30.0034	-31.2551	24	7001	26.6447	-69.3067	2	1
371W35	AU371	RH	2010-04-04	30.0047	-31.2558	24	7017	30.1961	93.7681	2	1
371W35	AU371	RH	2010-04-03	30.0044	-31.2555	24	7003	33.7412	-24.0071	2	1
371W35	AU371	RH	2010-04-04	30.0045	-31.2552	24	7012	34.9545	43.5617	2	1
371W35	AU371	RH	2010-04-03	30.0047	-31.2556	24	7004	47.5113	-148.461	2	1
371W35	AU371	RH	2010-04-03	30.003	-31.2549	24	7000	54.3015	-999	2	1
371W35	AU371	RH	2010-04-04	30.0048	-31.2552	24	7013	64.89	169.119	2	1
371W35	AU371	RH	2010-04-04	30.0041	-31.2553	24	7016	82.9202	-105.893	2	1
371W35	AU371	RH	2010-04-03	30.0036	-31.255	24	7002	103.376	74.4128	2	1
371W35	AU371	RH	2010-04-04	30.0025	-31.2552	24	7019	145.391	23.4275	2	1
371W35	AU371	RH	2010-04-04	30.0045	-31.2559	24	7018	222.598	66.7446	2	1
371W36	AU371	RH	2010-04-12	30.0332	-31.265	17	7417	0.206727	56.8432	1	2
371W36	AU371	RH	2010-04-12	30.0332	-31.265	17	7418	1.45862	-81.8511	1	2
371W36	AU371	RH	2010-04-12	30.0336	-31.2638	17	7407	1.87655	-6.74758	1	2
371W36	AU371	RH	2010-04-12	30.0336	-31.2638	17	7409	2.02264	17.856	1	2
371W36	AU371	RH	2010-04-12	30.0336	-31.2638	17	7408	2.28617	-153.854	1	2
371W36	AU371	RH	2010-04-12	30.0332	-31.265	17	7419	2.90819	126.548	1	2
371W36	AU371	RH	2010-04-12	30.0337	-31.2639	17	7411	3.48942	-152.102	1	2
371W36	AU371	RH	2010-04-12	30.0336	-31.2639	17	7414	5.79588	125.552	1	2
371W36	AU371	RH	2010-04-12	30.0337	-31.2639	17	7412	7.55707	44.2329	1	2
371W36	AU371	RH	2010-04-12	30.0336	-31.2638	17	7410	11.7086	134.246	1	2
371W36	AU371	RH	2010-04-12	30.0337	-31.2638	17	7413	14.7441	-148.888	1	2
371W36	AU371	RH	2010-04-12	30.0367	-31.2645	55	7402	24.9389	31.3845	1	2
371W36	AU371	RH	2010-04-12	30.0364	-31.2644	55	7403	30.7272	-58.6177	1	2
371W36	AU371	RH	2010-04-12	30.0335	-31.2635	17	7406	36.1011	-139.961	1	2
371W36	AU371	RH	2010-04-12	30.0336	-31.2645	17	7416	72.0069	31.1822	1	2
371W36	AU371	RH	2010-04-12	30.0336	-31.2638	17	7415	84.0366	161.077	1	2
371W36	AU371	RH	2010-04-12	30.0384	-31.2634	55	7400	97.7306	-999	1	2
371W36	AU371	RH	2010-04-12	30.0362	-31.2645	55	7404	118.42	47.7021	1	2
371W36	AU371	RH	2010-04-12	30.0383	-31.2642	55	7401	173.596	74.5949	1	2
371W36	AU371	RH	2010-04-12	30.0351	-31.2643	55	7405	189.546	19.6677	1	2
371W37	AU371	RH	2010-04-20	30.026	-31.2725	17	7810	1.88177	24.4679	2	1
371W37	AU371	RH	2010-04-20	30.0206	-31.2703	17	7800	2.09169	-999	2	1
371W37	AU371	RH	2010-04-20	30.026	-31.2725	17	7811	2.80787	81.2726	2	1
371W37	AU371	RH	2010-04-20	30.026	-31.2725	17	7813	3.99309	-113.047	2	1
371W37	AU371	RH	2010-04-20	30.026	-31.2725	17	7812	5.67187	161.613	2	1
371W37	AU371	RH	2010-04-20	30.0259	-31.2725	17	7814	5.96905	1.13592	2	1
371W37	AU371	RH	2010-04-20	30.0204	-31.2704	17	7804	10.7498	127.432	2	1
371W37	AU371	RH	2010-04-20	30.0206	-31.2703	17	7801	11.3528	76.6301	2	1
371W37	AU371	RH	2010-04-20	30.0206	-31.2704	17	7802	12.4391	-179.243	2	1
371W37	AU371	RH	2010-04-20	30.0259	-31.2725	17	7815	16.2924	-124.968	2	1
371W37	AU371	RH	2010-04-20	30.0204	-31.2703	17	7805	21.4149	77.4576	2	1
371W37	AU371	RH	2010-04-20	30.0206	-31.2703	17	7803	25.0428	-158.49	2	1
371W37	AU371	RH	2010-04-20	30.0255	-31.2736	17	7818	33.7908	-68.2908	2	1
371W37	AU371	RH	2010-04-20	30.026	-31.2739	17	7817	55.4864	118.822	2	1
371W37	AU371	RH	2010-04-20	30.0254	-31.2724	17	7809	57.5316	-8.85024	2	1
371W37	AU371	RH	2010-04-20	30.0249	-31.2722	17	7808	62.3967	-16.4884	2	1
371W37	AU371	RH	2010-04-20	30.0242	-31.2717	17	7807	92.0378	16.1798	2	1
371W37	AU371	RH	2010-04-20	30.0253	-31.2738	17	7819	110.01	173.62	2	1
371W37	AU371	RH	2010-04-20	30.026	-31.2726	17	7816	150.225	42.5143	2	1
371W37	AU371	RH	2010-04-20	30.0207	-31.2703	17	7806	400.726	27.0172	2	1
371W38	AU371	RH	2010-04-29	30.0339	-31.2682	55	8209	0.66521	-119.716	2	1
371W38	AU371	RH	2010-04-29	30.0339	-31.2683	55	8213	1.68265	161.353	2	1
371W38	AU371	RH	2010-04-29	30.0339	-31.2682	55	8214	2.25288	37.6052	2	1
371W38	AU371	RH	2010-04-29	30.0336	-31.2684	55	8207	2.91996	-32.6438	2	1
371W38	AU371	RH	2010-04-29	30.0339	-31.2682	55	8212	3.97607	94.007	2	1
371W38	AU371	RH	2010-04-29	30.0339	-31.2682	55	8210	4.03822	-24.6249	2	1
371W38	AU371	RH	2010-04-29	30.0339	-31.2682	55	8215	4.49499	171.952	2	1
371W38	AU371	RH	2010-04-29	30.0339	-31.2682	55	8211	5.9356	176.43	2	1
371W38	AU371	RH	2010-04-29	30.0339	-31.2683	55	8216	6.26687	-111.252	2	1
371W38	AU371	RH	2010-04-28	30.0317	-31.2691	17	8204	14.2692	-13.3983	2	1
371W38	AU371	RH	2010-04-29	30.0318	-31.2692	55	8205	15.4999	-101.794	2	1
371W38	AU371	RH	2010-04-29	30.0336	-31.2684	55	8208	37.4134	16.4263	2	1
371W38	AU371	RH	2010-04-28	30.0313	-31.2687	17	8203	68.2151	18.0424	2	1
371W38	AU371	RH	2010-04-28	30.0288	-31.2685	17	8200	68.8537	-999	2	1
371W38	AU371	RH	2010-04-29	30.034	-31.2683	55	8217	96.0163	-62.5978	2	1
371W38	AU371	RH	2010-04-28	30.0294	-31.2683	17	8201	97.1427	0.0317359	2	1
371W38	AU371	RH	2010-04-29	30.034	-31.2658	17	8219	97.3188	22.43	2	1
371W38	AU371	RH	2010-04-28	30.0303	-31.268	17	8202	125.337	54.7814	2	1
371W38	AU371	RH	2010-04-29	30.0319	-31.2691	55	8206	194.835	38.4485	2	1
371W38	AU371	RH	2010-04-29	30.0342	-31.2675	55	8218	203.986	-19.4017	2	1
371W39	AU371	RH	2010-05-07	30.0174	-31.26	17	8611	2.70711	146.358	2	2
371W39	AU371	RH	2010-05-07	30.0174	-31.2599	17	8613	3.5238	173.22	2	2
371W39	AU371	RH	2010-05-07	30.0152	-31.2633	17	8619	4.2825	-149.887	2	2
371W39	AU371	RH	2010-05-07	30.0174	-31.2599	17	8612	4.6037	51.1057	2	2
371W39	AU371	RH	2010-05-07	30.0174	-31.2599	17	8610	12.1062	10.1214	2	2
371W39	AU371	RH	2010-05-07	30.0174	-31.2597	17	8609	14.2275	117.976	2	2
371W39	AU371	RH	2010-05-07	30.0161	-31.2602	17	8604	18.0818	25.4756	2	2
371W39	AU371	RH	2010-05-07	30.0173	-31.26	17	8607	20.5936	-57.7899	2	2
371W39	AU371	RH	2010-05-07	30.0172	-31.2601	17	8606	21.1682	-36.5017	2	2
371W39	AU371	RH	2010-05-07	30.0172	-31.2598	17	8608	21.5084	73.7026	2	2
371W39	AU371	RH	2010-05-07	30.0155	-31.262	17	8617	24.9428	-37.801	2	2
371W39	AU371	RH	2010-05-07	30.0058	-31.2537	17	8600	32.6763	-999	2	2
371W39	AU371	RH	2010-05-07	30.0158	-31.2618	17	8616	38.3471	7.1119	2	2
371W39	AU371	RH	2010-05-07	30.0174	-31.2599	17	8614	47.1507	3.47569	2	2
371W39	AU371	RH	2010-05-07	30.0163	-31.2603	17	8605	94.7029	-60.4689	2	2
371W39	AU371	RH	2010-05-07	30.0154	-31.2622	17	8618	130.948	0.287606	2	2
371W39	AU371	RH	2010-05-07	30.0061	-31.2538	17	8601	147.864	117.516	2	2
371W39	AU371	RH	2010-05-07	30.005	-31.2546	24	8602	150.015	-22.5701	2	2
371W39	AU371	RH	2010-05-07	30.0173	-31.2603	17	8615	234.018	20.42	2	2
371W39	AU371	RH	2010-05-07	30.0043	-31.2557	24	8603	1337.59	-93.1356	2	2
371W4	AU371	RH	2009-11-15	30.0191	-31.2658	17	312	0.523773	143.446	1	2
371W4	AU371	RH	2009-11-15	30.0191	-31.2658	17	309	0.784951	171.365	1	2
371W4	AU371	RH	2009-11-15	30.0191	-31.2658	17	310	0.951657	11.5227	1	2
371W4	AU371	RH	2009-11-15	30.0191	-31.2658	17	311	0.956697	-79.5381	1	2
371W4	AU371	RH	2009-11-15	30.0191	-31.2658	17	313	5.81414	-76.3678	1	2
371W4	AU371	RH	2009-11-15	30.019	-31.2657	17	308	12.4503	-147.881	1	2
371W4	AU371	RH	2009-11-15	30.0191	-31.2658	17	314	20.2393	-79.5399	1	2
371W4	AU371	RH	2009-11-15	30.0384	-31.263	55	303	20.5541	16.5105	1	2
371W4	AU371	RH	2009-11-15	30.0383	-31.2623	7	301	29.7998	87.5895	1	2
371W4	AU371	RH	2009-11-15	30.0388	-31.263	55	300	102.036	-999	1	2
371W4	AU371	RH	2009-11-15	30.0385	-31.2621	55	302	105.718	133.941	1	2
371W4	AU371	RH	2009-11-15	30.0305	-31.2658	17	305	242.647	14.5642	1	2
371W4	AU371	RH	2009-11-15	30.0225	-31.2665	17	307	364.606	19.8987	1	2
371W4	AU371	RH	2009-11-15	30.0282	-31.266	17	306	594.738	1.03114	1	2
371W4	AU371	RH	2009-11-15	30.0383	-31.2632	55	304	863.511	44.7853	1	2
371W40	AU371	RH	2010-05-15	30.0299	-31.2722	55	9016	0.481281	-40.989	3	2
371W40	AU371	RH	2010-05-15	30.0298	-31.2723	55	9014	0.634453	149.859	3	2
371W40	AU371	RH	2010-05-15	30.0298	-31.2723	55	9012	1.52488	-149.061	3	2
371W40	AU371	RH	2010-05-15	30.0313	-31.2711	55	9005	2.2738	-18.3982	3	2
371W40	AU371	RH	2010-05-15	30.0298	-31.2723	55	9009	2.65511	166.959	3	2
371W40	AU371	RH	2010-05-15	30.0298	-31.2723	55	9011	2.85509	-153.128	3	2
371W40	AU371	RH	2010-05-15	30.0298	-31.2723	55	9010	3.46896	9.32395	3	2
371W40	AU371	RH	2010-05-15	30.0298	-31.2723	55	9013	4.52796	-82.1222	3	2
371W40	AU371	RH	2010-05-15	30.0314	-31.2712	55	9004	5.33715	107.45	3	2
371W40	AU371	RH	2010-05-15	30.0314	-31.2698	55	9002	10.5729	89.2531	3	2
371W40	AU371	RH	2010-05-15	30.0299	-31.2722	55	9017	11.1585	-113.515	3	2
371W40	AU371	RH	2010-05-15	30.0298	-31.2723	55	9018	11.207	-63.3135	3	2
371W40	AU371	RH	2010-05-15	30.0298	-31.2723	55	9015	13.7086	81.6512	3	2
371W40	AU371	RH	2010-05-15	30.0311	-31.2698	55	9001	31.4535	-24.3108	3	2
371W40	AU371	RH	2010-05-15	30.0296	-31.2727	55	9008	54.6291	153.887	3	2
371W40	AU371	RH	2010-05-15	30.0301	-31.2722	55	9007	74.459	0.726628	3	2
371W40	AU371	RH	2010-05-15	30.0314	-31.2699	55	9003	150.062	-10.8989	3	2
371W40	AU371	RH	2010-05-15	30.0299	-31.269	17	9000	161.697	-999	3	2
371W40	AU371	RH	2010-05-15	30.0313	-31.2711	55	9006	181.312	-47.1073	3	2
371W40	AU371	RH	2010-05-15	30.0297	-31.2724	55	9019	200.42	-141.748	3	2
371W41	AU371	RH	2010-05-24	29.9627	-31.2348	6	9409	0.861149	-29.0142	3	2
371W41	AU371	RH	2010-05-24	29.9627	-31.2348	6	9412	1.2403	-20.0895	3	2
371W41	AU371	RH	2010-05-24	29.9627	-31.2348	6	9413	1.68212	-68.3654	3	2
371W41	AU371	RH	2010-05-24	29.9627	-31.2348	6	9415	1.99552	178.499	3	2
371W41	AU371	RH	2010-05-24	29.9627	-31.2348	6	9410	2.38938	10.4429	3	2
371W41	AU371	RH	2010-05-24	29.9627	-31.2348	6	9414	2.8544	-131.335	3	2
371W41	AU371	RH	2010-05-24	29.9627	-31.2348	6	9407	2.95188	-110.563	3	2
371W41	AU371	RH	2010-05-24	29.9627	-31.2348	6	9411	3.85186	-154.132	3	2
371W41	AU371	RH	2010-05-24	29.9628	-31.2348	6	9408	4.34553	173.769	3	2
371W41	AU371	RH	2010-05-23	29.9592	-31.235	6	9401	4.5705	6.42992	3	2
371W41	AU371	RH	2010-05-23	29.9592	-31.235	6	9402	7.62252	-164.265	3	2
371W41	AU371	RH	2010-05-24	29.9628	-31.2348	6	9406	8.27195	-148.564	3	2
371W41	AU371	RH	2010-05-23	29.9592	-31.2352	6	9400	14.7666	-999	3	2
371W41	AU371	RH	2010-05-24	29.9628	-31.2349	6	9405	22.6002	-84.7706	3	2
371W41	AU371	RH	2010-05-24	29.9627	-31.2348	6	9416	24.71	-120.259	3	2
371W41	AU371	RH	2010-05-23	29.9592	-31.2351	6	9403	45.9501	-151.345	3	2
371W41	AU371	RH	2010-05-24	29.9626	-31.2347	6	9417	86.7871	-124.783	3	2
371W41	AU371	RH	2010-05-23	29.9595	-31.2348	6	9404	337.279	48.5337	3	2
371W41	AU371	RH	2010-05-24	29.9625	-31.2354	6	9418	382.942	-124.447	3	2
371W41	AU371	RH	2010-05-24	29.9657	-31.2338	6	9419	1058.49	34.0366	3	2
371W42	AU371	RH	2010-06-01	29.9869	-31.2385	15	9813	0.984319	-49.4967	1	2
371W42	AU371	RH	2010-06-01	29.9655	-31.2306	6	9800	1.26349	-999	1	2
371W42	AU371	RH	2010-06-01	29.9869	-31.2385	15	9811	2.72953	155.702	1	2
371W42	AU371	RH	2010-06-01	29.9869	-31.2385	15	9816	3.92022	-24.6339	1	2
371W42	AU371	RH	2010-06-01	29.9869	-31.2385	15	9815	4.50508	164.513	1	2
371W42	AU371	RH	2010-06-01	29.9869	-31.2385	15	9814	4.75495	-77.8769	1	2
371W42	AU371	RH	2010-06-01	29.987	-31.2385	15	9817	5.743	-103.97	1	2
371W42	AU371	RH	2010-06-01	29.9869	-31.2386	15	9810	6.12245	-173.146	1	2
371W42	AU371	RH	2010-06-01	29.9869	-31.2385	15	9812	6.81181	-164.881	1	2
371W42	AU371	RH	2010-06-01	29.9869	-31.2385	15	9809	9.22448	-171.694	1	2
371W42	AU371	RH	2010-06-01	29.9869	-31.2386	15	9808	9.72384	22.8779	1	2
371W42	AU371	RH	2010-06-01	29.9868	-31.2389	15	9807	34.9097	-103.015	1	2
371W42	AU371	RH	2010-06-01	29.9869	-31.2384	15	9818	44.9252	-133.71	1	2
371W42	AU371	RH	2010-06-01	29.9656	-31.2306	6	9801	51.3332	146.28	1	2
371W42	AU371	RH	2010-06-01	29.987	-31.2388	15	9819	74.0469	13.0085	1	2
371W42	AU371	RH	2010-06-01	29.9651	-31.2308	6	9802	106.566	-99.2979	1	2
371W42	AU371	RH	2010-06-01	29.9666	-31.2325	6	9804	110.48	-47.7047	1	2
371W42	AU371	RH	2010-06-01	29.9656	-31.2315	6	9803	156.083	-6.06793	1	2
371W42	AU371	RH	2010-06-01	29.982	-31.2372	15	9806	539.495	1.03762	1	2
371W42	AU371	RH	2010-06-01	29.9676	-31.2326	6	9805	1581.26	16.3238	1	2
371W43	AU371	RH	2010-06-09	30.0143	-31.2765	27	10210	0.317188	159.549	2	1
371W43	AU371	RH	2010-06-09	30.0104	-31.278	27	10204	0.66505	-99.0921	2	1
371W43	AU371	RH	2010-06-09	30.0143	-31.2765	27	10218	0.956554	70.4592	2	1
371W43	AU371	RH	2010-06-09	30.0143	-31.2765	27	10211	1.04746	-162.581	2	1
371W43	AU371	RH	2010-06-09	30.0143	-31.2765	27	10216	1.45841	-48.807	2	1
371W43	AU371	RH	2010-06-09	30.0143	-31.2765	27	10212	1.56971	-28.9415	2	1
371W43	AU371	RH	2010-06-09	30.0143	-31.2765	27	10213	1.61679	168.7	2	1
371W43	AU371	RH	2010-06-09	30.0143	-31.2765	27	10209	1.7948	119.13	2	1
371W43	AU371	RH	2010-06-09	30.0143	-31.2765	27	10214	1.80408	177.068	2	1
371W43	AU371	RH	2010-06-09	30.0143	-31.2765	27	10215	1.90316	-72.9245	2	1
371W43	AU371	RH	2010-06-09	30.0104	-31.2781	27	10203	1.96875	144.236	2	1
371W43	AU371	RH	2010-06-09	30.0143	-31.2765	27	10217	2.97891	-122.109	2	1
371W43	AU371	RH	2010-06-09	30.0142	-31.2765	27	10208	4.9165	-29.2136	2	1
371W43	AU371	RH	2010-06-09	30.011	-31.2744	27	10200	25.5725	-999	2	1
371W43	AU371	RH	2010-06-09	30.0143	-31.2765	27	10219	29.3778	93.5602	2	1
371W43	AU371	RH	2010-06-09	30.0104	-31.278	27	10205	47.863	-179.239	2	1
371W43	AU371	RH	2010-06-09	30.0107	-31.2774	27	10202	87.5982	21.051	2	1
371W43	AU371	RH	2010-06-09	30.0127	-31.277	27	10207	161.893	9.45339	2	1
371W43	AU371	RH	2010-06-09	30.0108	-31.2779	27	10206	228.132	-9.12767	2	1
371W43	AU371	RH	2010-06-09	30.0109	-31.2742	27	10201	385.735	-165.511	2	1
371W44	AU371	RH	2010-06-18	30.0202	-31.2776	55	10614	1.18013	173.515	2	1
371W44	AU371	RH	2010-06-18	30.0202	-31.2776	55	10615	1.44374	44.4694	2	1
371W44	AU371	RH	2010-06-18	30.0202	-31.2776	55	10611	1.5247	175.73	2	1
371W44	AU371	RH	2010-06-18	30.0202	-31.2776	55	10613	1.67908	-5.19491	2	1
371W44	AU371	RH	2010-06-17	30.0198	-31.2782	55	10600	3.08174	-999	2	1
371W44	AU371	RH	2010-06-18	30.0202	-31.2776	55	10612	3.43473	-104.39	2	1
371W44	AU371	RH	2010-06-17	30.0198	-31.2781	55	10601	3.44396	-140.151	2	1
371W44	AU371	RH	2010-06-18	30.0202	-31.2776	55	10610	3.94285	109.168	2	1
371W44	AU371	RH	2010-06-18	30.0202	-31.2776	55	10616	6.41163	163.135	2	1
371W44	AU371	RH	2010-06-18	30.0202	-31.2775	55	10609	7.34107	-163.451	2	1
371W44	AU371	RH	2010-06-18	30.0204	-31.2776	55	10607	8.88251	-101.705	2	1
371W44	AU371	RH	2010-06-17	30.0199	-31.2782	55	10603	9.04527	168.88	2	1
371W44	AU371	RH	2010-06-17	30.0198	-31.2782	55	10602	10.0204	-150.115	2	1
371W44	AU371	RH	2010-06-18	30.0204	-31.2777	55	10606	10.9867	-88.4594	2	1
371W44	AU371	RH	2010-06-18	30.0202	-31.2777	55	10605	18.4411	37.1554	2	1
371W44	AU371	RH	2010-06-18	30.0203	-31.2776	55	10608	18.6578	61.6045	2	1
371W44	AU371	RH	2010-06-18	30.0201	-31.2775	55	10617	23.2222	-20.6998	2	1
371W44	AU371	RH	2010-06-17	30.0198	-31.2782	55	10604	70.1013	120.826	2	1
371W44	AU371	RH	2010-06-18	30.0207	-31.2778	55	10619	88.6063	105.564	2	1
371W44	AU371	RH	2010-06-18	30.02	-31.2774	55	10618	89.3692	158.602	2	1
371W45	AU371	RH	2010-06-26	29.9945	-31.25	24	11017	0.750816	-159.341	3	2
371W45	AU371	RH	2010-06-26	29.9945	-31.25	24	11014	1.69683	-19.9749	3	2
371W45	AU371	RH	2010-06-26	29.9945	-31.25	24	11016	2.53472	-167.026	3	2
371W45	AU371	RH	2010-06-26	29.9945	-31.25	24	11015	3.40854	155.351	3	2
371W45	AU371	RH	2010-06-26	30.017	-31.2415	29	11000	4.35121	-999	3	2
371W45	AU371	RH	2010-06-26	30.017	-31.2415	29	11001	32.228	7.50262	3	2
371W45	AU371	RH	2010-06-26	30.0221	-31.2373	29	11006	89.6037	-68.7021	3	2
371W45	AU371	RH	2010-06-26	30.0254	-31.2402	29	11010	103.063	-18.0308	3	2
371W45	AU371	RH	2010-06-26	30.0241	-31.2375	55	11008	122.2	40.4013	3	2
371W45	AU371	RH	2010-06-26	30.0229	-31.2374	29	11007	124.76	-0.22733	3	2
371W45	AU371	RH	2010-06-26	30.0217	-31.2373	29	11004	140.875	-33.6101	3	2
371W45	AU371	RH	2010-06-26	30.0217	-31.2361	55	11005	149.186	163.653	3	2
371W45	AU371	RH	2010-06-26	30.026	-31.241	29	11011	170.554	145.012	3	2
371W45	AU371	RH	2010-06-26	29.9953	-31.2487	24	11013	172.509	-44.7063	3	2
371W45	AU371	RH	2010-06-26	30.0172	-31.2413	29	11002	217.608	10.6948	3	2
371W45	AU371	RH	2010-06-26	30.0249	-31.2383	55	11009	240.795	30.2602	3	2
371W45	AU371	RH	2010-06-26	30.0191	-31.2404	29	11003	464.817	-24.1445	3	2
371W45	AU371	RH	2010-06-26	29.9839	-31.2519	24	11019	709.522	84.1035	3	2
371W45	AU371	RH	2010-06-26	29.9945	-31.25	24	11018	1114.76	-117.703	3	2
371W45	AU371	RH	2010-06-26	30.0245	-31.2404	29	11012	3177.59	-42.8437	3	2
371W46	AU371	RH	2010-07-04	30.0218	-31.2596	17	11403	1.06127	-9.77035	2	2
371W46	AU371	RH	2010-07-04	30.0332	-31.2442	29	11414	1.09789	106.005	2	2
371W46	AU371	RH	2010-07-04	30.0332	-31.2442	29	11413	2.92357	133.303	2	2
371W46	AU371	RH	2010-07-04	30.0332	-31.2442	29	11416	2.93466	154.194	2	2
371W46	AU371	RH	2010-07-04	30.0332	-31.2442	29	11415	3.54469	174.129	2	2
371W46	AU371	RH	2010-07-04	30.0218	-31.2596	17	11404	8.96685	114.554	2	2
371W46	AU371	RH	2010-07-04	30.0333	-31.2442	29	11412	9.25057	-120.668	2	2
371W46	AU371	RH	2010-07-04	30.0192	-31.2486	29	11400	9.46963	-999	2	2
371W46	AU371	RH	2010-07-04	30.0219	-31.2595	17	11405	15.806	7.27433	2	2
371W46	AU371	RH	2010-07-04	30.0221	-31.2597	17	11402	34.6655	125.685	2	2
371W46	AU371	RH	2010-07-04	30.0331	-31.2448	29	11411	69.8765	-4.37014	2	2
371W46	AU371	RH	2010-07-04	30.0329	-31.2431	29	11418	78.1767	-8.9285	2	2
371W46	AU371	RH	2010-07-04	30.0332	-31.2442	29	11417	135.989	-113.97	2	2
371W46	AU371	RH	2010-07-04	30.0326	-31.2425	29	11419	141.656	173.798	2	2
371W46	AU371	RH	2010-07-04	30.0309	-31.2476	29	11409	191.491	19.3608	2	2
371W46	AU371	RH	2010-07-04	30.0297	-31.2491	29	11408	215.874	12.9988	2	2
371W46	AU371	RH	2010-07-04	30.0324	-31.2467	29	11410	244.029	-37.6597	2	2
371W46	AU371	RH	2010-07-04	30.0274	-31.2539	29	11407	624.989	-18.2005	2	2
371W46	AU371	RH	2010-07-04	30.022	-31.2594	17	11406	871.774	-4.58514	2	2
371W46	AU371	RH	2010-07-04	30.0192	-31.2485	29	11401	1382.18	-168.981	2	2
371W47	AU371	RH	2010-07-13	30.031	-31.242	29	11811	2.49607	154.377	2	1
371W47	AU371	RH	2010-07-13	30.0309	-31.242	29	11808	4.68786	-120.149	2	1
371W47	AU371	RH	2010-07-13	30.0309	-31.242	29	11810	5.67049	-172.299	2	1
371W47	AU371	RH	2010-07-13	30.031	-31.242	29	11809	6.02515	-179.142	2	1
371W47	AU371	RH	2010-07-13	30.0307	-31.2416	29	11813	12.7512	18.9528	2	1
371W47	AU371	RH	2010-07-13	30.0306	-31.2415	29	11814	43.9852	-104.292	2	1
371W47	AU371	RH	2010-07-13	30.0309	-31.242	29	11812	55.5312	-2.74742	2	1
371W47	AU371	RH	2010-07-13	30.0302	-31.2417	55	11815	59.0643	-80.7913	2	1
371W47	AU371	RH	2010-07-13	30.0316	-31.2421	29	11807	71.1888	-2.68609	2	1
371W47	AU371	RH	2010-07-13	30.0322	-31.2426	29	11805	79.5381	-92.1604	2	1
371W47	AU371	RH	2010-07-12	30.0312	-31.2413	29	11803	102.688	-28.016	2	1
371W47	AU371	RH	2010-07-13	30.0295	-31.2405	55	11817	110.474	104.695	2	1
371W47	AU371	RH	2010-07-12	30.0302	-31.2418	55	11801	136.238	-9.13934	2	1
371W47	AU371	RH	2010-07-13	30.0329	-31.2426	29	11806	146.753	-158.346	2	1
371W47	AU371	RH	2010-07-12	30.0299	-31.2407	55	11802	150.311	128.056	2	1
371W47	AU371	RH	2010-07-12	30.0322	-31.2413	29	11804	158.12	91.6753	2	1
371W47	AU371	RH	2010-07-13	30.0306	-31.2404	55	11818	174.899	49.3815	2	1
371W47	AU371	RH	2010-07-13	30.0304	-31.2421	55	11816	212.133	173.316	2	1
371W47	AU371	RH	2010-07-13	30.0319	-31.2413	29	11819	301.846	29.9184	2	1
371W47	AU371	RH	2010-07-12	30.0304	-31.2472	29	11800	641.601	-999	2	1
371W48	AU371	RH	2010-07-21	30.0238	-31.2414	29	12210	0.523831	75.4438	1	1
371W48	AU371	RH	2010-07-21	30.0238	-31.2414	29	12209	0.785134	-176.262	1	1
371W48	AU371	RH	2010-07-21	30.0208	-31.2513	29	12216	0.962544	4.91835	1	1
371W48	AU371	RH	2010-07-21	30.0238	-31.2418	29	12213	1.48993	132.314	1	1
371W48	AU371	RH	2010-07-21	30.0208	-31.2514	29	12217	2.6938	122.409	1	1
371W48	AU371	RH	2010-07-21	30.0207	-31.2376	55	12200	3.69401	-999	1	1
371W48	AU371	RH	2010-07-21	30.0208	-31.2513	29	12218	5.71527	-60.0005	1	1
371W48	AU371	RH	2010-07-21	30.0238	-31.2414	29	12211	9.1445	-23.2496	1	1
371W48	AU371	RH	2010-07-21	30.0239	-31.2415	29	12208	9.23585	-63.7882	1	1
371W48	AU371	RH	2010-07-21	30.0207	-31.2514	29	12219	13.8558	-142.408	1	1
371W48	AU371	RH	2010-07-21	30.0238	-31.2415	29	12212	37.2038	-2.07026	1	1
371W48	AU371	RH	2010-07-21	30.0238	-31.2419	29	12207	49.9211	86.3044	1	1
371W48	AU371	RH	2010-07-21	30.0248	-31.2407	29	12204	53.0477	-6.97336	1	1
371W48	AU371	RH	2010-07-21	30.0245	-31.242	29	12206	74.5007	72.1903	1	1
371W48	AU371	RH	2010-07-21	30.0207	-31.2376	55	12201	173.415	-45.1853	1	1
371W48	AU371	RH	2010-07-21	30.0254	-31.2407	29	12205	181.132	118.322	1	1
371W48	AU371	RH	2010-07-21	30.021	-31.239	29	12202	188.374	-18.2926	1	1
371W48	AU371	RH	2010-07-21	30.022	-31.2403	29	12203	298.608	-50.6324	1	1
371W48	AU371	RH	2010-07-21	30.0238	-31.2418	29	12214	530.334	-84.7568	1	1
371W48	AU371	RH	2010-07-21	30.0201	-31.2449	29	12215	780.368	-50.4034	1	1
371W49	AU371	RH	2010-08-02	30.0343	-31.2442	29	12812	0.665396	45.5467	2	1
371W49	AU371	RH	2010-08-02	30.0343	-31.2442	29	12810	0.962636	15.1083	2	1
371W49	AU371	RH	2010-08-02	30.0343	-31.2442	29	12811	3.40509	-156.751	2	1
371W49	AU371	RH	2010-08-02	30.0344	-31.2442	29	12806	3.52966	95.2574	2	1
371W49	AU371	RH	2010-08-03	30.0308	-31.2421	29	12818	3.7501	-33.7464	2	1
371W49	AU371	RH	2010-08-02	30.0343	-31.2442	29	12803	3.82789	-74.614	2	1
371W49	AU371	RH	2010-08-02	30.0343	-31.2442	29	12805	4.19088	-78.9674	2	1
371W49	AU371	RH	2010-08-02	30.0343	-31.2442	29	12804	4.54883	162.021	2	1
371W49	AU371	RH	2010-08-03	30.0308	-31.2421	29	12819	9.68498	-167.819	2	1
371W49	AU371	RH	2010-08-02	30.0343	-31.2444	29	12802	17.7984	21.0096	2	1
371W49	AU371	RH	2010-08-03	30.0343	-31.2443	29	12813	34.9224	94.5151	2	1
371W49	AU371	RH	2010-08-03	30.0308	-31.2417	29	12817	41.8744	-100.034	2	1
371W49	AU371	RH	2010-08-02	30.0345	-31.2446	29	12809	45.6172	158.305	2	1
371W49	AU371	RH	2010-08-02	30.0344	-31.2442	29	12807	100.278	-104.91	2	1
371W49	AU371	RH	2010-08-03	30.0342	-31.244	29	12814	101.031	-17.5647	2	1
371W49	AU371	RH	2010-08-02	30.0343	-31.2472	29	12800	105.521	-999	2	1
371W49	AU371	RH	2010-08-03	30.032	-31.2419	29	12816	128.317	-32.8814	2	1
371W49	AU371	RH	2010-08-02	30.0346	-31.2434	29	12808	145.113	172.991	2	1
371W49	AU371	RH	2010-08-03	30.0337	-31.2433	29	12815	237.134	-12.5508	2	1
371W49	AU371	RH	2010-08-02	30.0347	-31.248	29	12801	433.556	-158.022	2	1
371W5	AU371	RH	2009-11-17	30.026	-31.2693	17	427	0	-999	1	2
371W5	AU371	RH	2009-11-17	30.0294	-31.2713	55	405	1.35361	-49.1001	1	2
371W5	AU371	RH	2009-11-17	30.0294	-31.2712	55	410	1.36244	-167.851	1	2
371W5	AU371	RH	2009-11-17	30.0255	-31.2698	17	425	1.68256	-118.81	1	2
371W5	AU371	RH	2009-11-17	30.0293	-31.2713	55	415	2.49572	-58.3254	1	2
371W5	AU371	RH	2009-11-17	30.0294	-31.2713	55	406	3.53852	-179.405	1	2
371W5	AU371	RH	2009-11-17	30.0294	-31.2713	55	411	3.71447	160.775	1	2
371W5	AU371	RH	2009-11-17	30.0294	-31.2712	55	412	5.36862	171.79	1	2
371W5	AU371	RH	2009-11-17	30.0287	-31.2717	17	419	5.37224	101.204	1	2
371W5	AU371	RH	2009-11-17	30.0294	-31.2713	55	409	6.11519	118.574	1	2
371W5	AU371	RH	2009-11-17	30.0294	-31.2712	55	408	7.00925	167.385	1	2
371W5	AU371	RH	2009-11-17	30.0293	-31.2713	55	416	9.40811	-100.913	1	2
371W5	AU371	RH	2009-11-17	30.0295	-31.2713	55	404	10.2096	1.88208	1	2
371W5	AU371	RH	2009-11-17	30.0294	-31.2713	55	407	12.6967	-3.33224	1	2
371W5	AU371	RH	2009-11-17	30.0296	-31.2713	55	403	13.9441	35.433	1	2
371W5	AU371	RH	2009-11-17	30.0294	-31.2713	55	413	14.8702	-124.4	1	2
371W5	AU371	RH	2009-11-17	30.0294	-31.2711	17	414	17.5294	-142.274	1	2
371W5	AU371	RH	2009-11-17	30.0294	-31.2712	55	417	19.622	132.523	1	2
371W5	AU371	RH	2009-11-17	30.0278	-31.2716	17	421	67.7398	-11.7024	1	2
371W5	AU371	RH	2009-11-17	30.0294	-31.2714	55	418	73.3141	61.3596	1	2
371W5	AU371	RH	2009-11-17	30.0271	-31.2717	17	422	77.2197	38.8999	1	2
371W5	AU371	RH	2009-11-17	30.0255	-31.2698	17	426	81.2956	-119.093	1	2
371W5	AU371	RH	2009-11-17	30.0302	-31.2707	55	402	94.8217	-1.69055	1	2
371W5	AU371	RH	2009-11-17	30.0287	-31.2716	17	420	96.4161	-71.8733	1	2
371W5	AU371	RH	2009-11-17	30.0264	-31.2699	17	424	98.1287	-79.6886	1	2
371W5	AU371	RH	2009-11-17	30.033	-31.2687	55	400	111.36	-999	1	2
371W5	AU371	RH	2009-11-17	30.0265	-31.2714	17	423	179.903	57.1701	1	2
371W5	AU371	RH	2009-11-17	30.032	-31.2689	17	401	284.108	-39.5544	1	2
371W50	AU371	RH	2010-08-11	30.0342	-31.2451	29	13207	1.81417	-30.1227	2	1
371W50	AU371	RH	2010-08-11	30.0342	-31.2452	29	13203	2.15511	78.5428	2	1
371W50	AU371	RH	2010-08-11	30.0398	-31.2518	29	13215	2.17108	35.0847	2	1
371W50	AU371	RH	2010-08-11	30.0342	-31.2452	29	13204	2.85566	2.08529	2	1
371W50	AU371	RH	2010-08-11	30.0342	-31.2452	29	13206	3.21117	131.868	2	1
371W50	AU371	RH	2010-08-11	30.0342	-31.2451	29	13205	3.23596	174.437	2	1
371W50	AU371	RH	2010-08-11	30.0398	-31.2518	29	13216	13.7658	27.5998	2	1
371W50	AU371	RH	2010-08-11	30.0397	-31.2518	29	13217	22.0488	-147.402	2	1
371W50	AU371	RH	2010-08-11	30.0402	-31.2516	29	13214	43.3355	19.8196	2	1
371W50	AU371	RH	2010-08-11	30.0342	-31.2451	29	13208	109.004	90.3029	2	1
371W50	AU371	RH	2010-08-11	30.035	-31.246	29	13202	132.65	-85.2359	2	1
371W50	AU371	RH	2010-08-11	30.0316	-31.2484	29	13200	133.701	-999	2	1
371W50	AU371	RH	2010-08-11	30.0398	-31.2519	29	13218	155.231	24.262	2	1
371W50	AU371	RH	2010-08-11	30.035	-31.2445	29	13209	180.605	88.3163	2	1
371W50	AU371	RH	2010-08-11	30.0362	-31.2456	29	13210	188.099	17.9523	2	1
371W50	AU371	RH	2010-08-11	30.0408	-31.2489	29	13212	189.848	-37.1617	2	1
371W50	AU371	RH	2010-08-11	30.0399	-31.2532	55	13219	194.224	143.092	2	1
371W50	AU371	RH	2010-08-11	30.0328	-31.2479	29	13201	327.981	-19.9257	2	1
371W50	AU371	RH	2010-08-11	30.0426	-31.2487	11	13213	433.567	131.976	2	1
371W50	AU371	RH	2010-08-11	30.037	-31.247	29	13211	448.134	-33.1372	2	1
371W51	AU371	RH	2010-08-19	30.0192	-31.2697	17	13611	1.2345	-110.516	3	2
371W51	AU371	RH	2010-08-19	30.0345	-31.2651	30	13600	1.97861	-999	3	2
371W51	AU371	RH	2010-08-19	30.0192	-31.2697	17	13612	2.43724	-166.619	3	2
371W51	AU371	RH	2010-08-19	30.0345	-31.2651	30	13601	3.54427	157.255	3	2
371W51	AU371	RH	2010-08-19	30.0194	-31.2698	17	13614	3.82026	89.2973	3	2
371W51	AU371	RH	2010-08-19	30.0269	-31.2687	30	13606	10.1168	160.261	3	2
371W51	AU371	RH	2010-08-19	30.027	-31.2686	30	13607	25.2214	-137.337	3	2
371W51	AU371	RH	2010-08-19	30.0192	-31.2697	17	13613	27.9186	156.877	3	2
371W51	AU371	RH	2010-08-19	30.0267	-31.2686	30	13608	78.6135	41.9632	3	2
371W51	AU371	RH	2010-08-19	30.0245	-31.271	30	13618	122.451	-91.6649	3	2
371W51	AU371	RH	2010-08-19	30.0325	-31.2669	30	13603	129.292	5.84344	3	2
371W51	AU371	RH	2010-08-19	30.0254	-31.2717	30	13619	137.909	20.8478	3	2
371W51	AU371	RH	2010-08-19	30.0315	-31.2676	30	13604	223.644	12.2159	3	2
371W51	AU371	RH	2010-08-19	30.0208	-31.2683	17	13610	241.008	-43.5062	3	2
371W51	AU371	RH	2010-08-19	30.0296	-31.2685	30	13605	284.01	23.2217	3	2
371W51	AU371	RH	2010-08-19	30.0345	-31.2651	30	13602	308.37	149.615	3	2
371W51	AU371	RH	2010-08-19	30.0194	-31.2698	17	13615	314.342	-112.64	3	2
371W51	AU371	RH	2010-08-19	30.0276	-31.2678	30	13617	501.483	148.329	3	2
371W51	AU371	RH	2010-08-19	30.0224	-31.2693	30	13616	560.903	-8.70457	3	2
371W51	AU371	RH	2010-08-19	30.0263	-31.268	30	13609	574.833	-63.0652	3	2
371W52	AU371	RH	2010-08-27	30.0314	-31.2492	29	14012	0.78512	151.056	2	1
371W52	AU371	RH	2010-08-27	30.0319	-31.249	29	14006	2.54901	-124.034	2	1
371W52	AU371	RH	2010-08-28	30.0329	-31.249	29	14018	2.84194	-133.472	2	1
371W52	AU371	RH	2010-08-27	30.0319	-31.249	29	14002	3.37548	-96.0918	2	1
371W52	AU371	RH	2010-08-27	30.0315	-31.2492	29	14011	3.92876	-83.7471	2	1
371W52	AU371	RH	2010-08-27	30.0319	-31.2489	29	14003	4.25688	-168.109	2	1
371W52	AU371	RH	2010-08-27	30.0319	-31.249	29	14004	5.54673	-25.7294	2	1
371W52	AU371	RH	2010-08-27	30.0319	-31.249	29	14005	6.06567	173.205	2	1
371W52	AU371	RH	2010-08-27	30.0314	-31.2492	29	14010	8.55242	49.3698	2	1
371W52	AU371	RH	2010-08-28	30.0331	-31.2493	29	14016	11.5372	-24.5297	2	1
371W52	AU371	RH	2010-08-28	30.0328	-31.249	29	14019	16.7158	179.31	2	1
371W52	AU371	RH	2010-08-28	30.0315	-31.2492	29	14013	27.3881	-47.675	2	1
371W52	AU371	RH	2010-08-28	30.0331	-31.249	29	14015	37.6899	109.268	2	1
371W52	AU371	RH	2010-08-28	30.0331	-31.2494	29	14017	57.3134	166.174	2	1
371W52	AU371	RH	2010-08-27	30.0319	-31.249	29	14007	57.7455	6.9803	2	1
371W52	AU371	RH	2010-08-27	30.0313	-31.2489	29	14001	58.7813	38.1979	2	1
371W52	AU371	RH	2010-08-27	30.0315	-31.2494	29	14008	88.0615	-17.531	2	1
371W52	AU371	RH	2010-08-27	30.0312	-31.25	29	14009	99.0872	169.859	2	1
371W52	AU371	RH	2010-08-28	30.0317	-31.2491	29	14014	149.307	3.75968	2	1
371W52	AU371	RH	2010-08-27	30.0292	-31.2503	29	14000	275.837	-999	2	1
371W53	AU371	RH	2010-09-05	30.0185	-31.2475	29	14416	0.75093	-12.1951	2	2
371W53	AU371	RH	2010-09-05	30.0341	-31.2456	29	14403	0.962632	-29.8044	2	2
371W53	AU371	RH	2010-09-05	30.0341	-31.2456	29	14402	1.66408	-174.51	2	2
371W53	AU371	RH	2010-09-05	30.0341	-31.2456	29	14404	2.17577	174.547	2	2
371W53	AU371	RH	2010-09-05	30.0185	-31.2475	29	14417	2.25277	148.036	2	2
371W53	AU371	RH	2010-09-05	30.0342	-31.2456	29	14406	2.4699	104.775	2	2
371W53	AU371	RH	2010-09-05	30.0341	-31.2456	29	14405	3.04217	147.738	2	2
371W53	AU371	RH	2010-09-05	30.0184	-31.2475	29	14418	3.51493	-98.272	2	2
371W53	AU371	RH	2010-09-05	30.0341	-31.2457	29	14401	15.3169	139.255	2	2
371W53	AU371	RH	2010-09-05	30.0184	-31.2475	29	14419	23.7964	46.5373	2	2
371W53	AU371	RH	2010-09-05	30.033	-31.2459	29	14409	35.3614	-22.9162	2	2
371W53	AU371	RH	2010-09-05	30.0334	-31.2459	29	14408	38.8926	29.1393	2	2
371W53	AU371	RH	2010-09-05	30.0332	-31.2467	29	14411	58.5401	165.715	2	2
371W53	AU371	RH	2010-09-05	30.0341	-31.2456	29	14407	85.3352	-4.42813	2	2
371W53	AU371	RH	2010-09-05	30.0327	-31.246	29	14410	100.069	-100.236	2	2
371W53	AU371	RH	2010-09-05	30.035	-31.2453	29	14400	104.445	-999	2	2
371W53	AU371	RH	2010-09-05	30.0191	-31.2466	29	14415	132.672	-46.5082	2	2
371W53	AU371	RH	2010-09-05	30.0328	-31.2464	29	14412	146.39	-17.4594	2	2
371W53	AU371	RH	2010-09-05	30.0315	-31.2458	29	14413	396.597	-1.60945	2	2
371W53	AU371	RH	2010-09-05	30.0281	-31.2444	29	14414	965.678	-40.5895	2	2
371W54	AU371	RH	2010-09-13	30.0316	-31.2654	30	14819	0.665229	115.917	2	1
371W54	AU371	RH	2010-09-13	30.0236	-31.2691	30	14808	1.56411	-29.9823	2	1
371W54	AU371	RH	2010-09-13	30.0233	-31.2692	30	14800	1.6149	-999	2	1
371W54	AU371	RH	2010-09-13	30.0236	-31.2691	30	14809	1.75965	109.99	2	1
371W54	AU371	RH	2010-09-13	30.0237	-31.269	30	14806	7.25542	-150.264	2	1
371W54	AU371	RH	2010-09-13	30.0236	-31.2691	30	14804	7.6938	33.3491	2	1
371W54	AU371	RH	2010-09-13	30.0236	-31.269	30	14805	8.04756	-25.0596	2	1
371W54	AU371	RH	2010-09-13	30.0235	-31.2691	30	14803	8.91703	145.394	2	1
371W54	AU371	RH	2010-09-13	30.0236	-31.269	30	14807	9.30671	-42.6496	2	1
371W54	AU371	RH	2010-09-13	30.0332	-31.2671	30	14814	29.2556	-24.5366	2	1
371W54	AU371	RH	2010-09-13	30.0336	-31.2664	30	14816	38.7445	-58.6272	2	1
371W54	AU371	RH	2010-09-13	30.0239	-31.269	30	14802	40.6822	-175.74	2	1
371W54	AU371	RH	2010-09-13	30.0319	-31.2674	30	14812	40.7018	-137.3	2	1
371W54	AU371	RH	2010-09-13	30.032	-31.2658	30	14818	57.8269	23.8426	2	1
371W54	AU371	RH	2010-09-13	30.0233	-31.2692	30	14801	64.2278	-88.4328	2	1
371W54	AU371	RH	2010-09-13	30.0335	-31.267	30	14815	74.2205	-51.2831	2	1
371W54	AU371	RH	2010-09-13	30.0333	-31.2662	30	14817	148.7	-23.0979	2	1
371W54	AU371	RH	2010-09-13	30.0316	-31.2672	30	14813	171.264	145.423	2	1
371W54	AU371	RH	2010-09-13	30.0295	-31.2678	30	14811	257.299	2.67536	2	1
371W54	AU371	RH	2010-09-13	30.0236	-31.2691	30	14810	631.415	145.792	2	1
371W6	AU371	RH	2009-11-19	30.0259	-31.2693	17	523	0.317225	24.5005	1	1
371W6	AU371	RH	2009-11-19	30.026	-31.2692	17	528	2.44783	-13.8689	1	1
371W6	AU371	RH	2009-11-19	30.0338	-31.2668	17	513	5.03393	77.0485	1	1
371W6	AU371	RH	2009-11-19	30.0343	-31.2682	55	506	5.04043	57.522	1	1
371W6	AU371	RH	2009-11-19	30.0333	-31.2677	55	510	5.10263	-62.8388	1	1
371W6	AU371	RH	2009-11-19	30.0338	-31.2669	17	514	5.68866	-154.728	1	1
371W6	AU371	RH	2009-11-19	30.0365	-31.2662	55	502	6.01079	33.5662	1	1
371W6	AU371	RH	2009-11-19	30.026	-31.2692	17	525	6.82247	-156.832	1	1
371W6	AU371	RH	2009-11-19	30.026	-31.2692	17	527	8.68938	172.134	1	1
371W6	AU371	RH	2009-11-19	30.026	-31.2692	17	526	9.41072	-166.355	1	1
371W6	AU371	RH	2009-11-19	30.0338	-31.2668	17	515	9.63481	-140.216	1	1
371W6	AU371	RH	2009-11-19	30.0335	-31.2676	55	504	12.8978	74.3541	1	1
371W6	AU371	RH	2009-11-19	30.0259	-31.2693	17	524	13.6903	68.0834	1	1
371W6	AU371	RH	2009-11-19	30.0335	-31.2678	55	509	22.4713	-17.8099	1	1
371W6	AU371	RH	2009-11-19	30.0336	-31.2679	55	508	23.538	9.51172	1	1
371W6	AU371	RH	2009-11-19	30.0318	-31.2708	55	518	26.6711	59.7368	1	1
371W6	AU371	RH	2009-11-19	30.0338	-31.2669	17	516	36.2673	-143.582	1	1
371W6	AU371	RH	2009-11-19	30.0367	-31.2659	55	501	42.0012	109.463	1	1
371W6	AU371	RH	2009-11-19	30.0264	-31.2695	17	522	47.263	-63.4271	1	1
371W6	AU371	RH	2009-11-19	30.0332	-31.2677	55	511	51.1145	149.036	1	1
371W6	AU371	RH	2009-11-19	30.0334	-31.2673	17	512	69.7054	14.2148	1	1
371W6	AU371	RH	2009-11-19	30.0343	-31.2683	55	507	79.2888	111.488	1	1
371W6	AU371	RH	2009-11-19	30.0335	-31.2675	55	505	118.159	179.159	1	1
371W6	AU371	RH	2009-11-19	30.0352	-31.2657	55	500	157.506	-999	1	1
371W6	AU371	RH	2009-11-19	30.0315	-31.2708	55	519	268.936	18.7868	1	1
371W6	AU371	RH	2009-11-19	30.0364	-31.2662	55	503	342.328	-0.487032	1	1
371W6	AU371	RH	2009-11-19	30.029	-31.2703	17	520	406.964	-64.2743	1	1
371W6	AU371	RH	2009-11-19	30.0265	-31.2729	17	521	409.028	138.925	1	1
371W6	AU371	RH	2009-11-19	30.034	-31.2667	17	517	545.108	171.127	1	1
371W7	AU371	RH	2009-11-21	30.0332	-31.2665	17	603	0.317245	76.693	2	1
371W7	AU371	RH	2009-11-21	30.0332	-31.2665	17	601	0.706207	-122.533	2	1
371W7	AU371	RH	2009-11-21	30.0287	-31.2685	17	617	0.784979	-140.9	2	1
371W7	AU371	RH	2009-11-21	30.0324	-31.267	17	609	0.868975	-134.923	2	1
371W7	AU371	RH	2009-11-21	30.0332	-31.2665	17	600	0.960883	-999	2	1
371W7	AU371	RH	2009-11-21	30.0332	-31.2665	17	602	1.0474	109.681	2	1
371W7	AU371	RH	2009-11-21	30.0287	-31.2685	17	618	1.22083	-137.562	2	1
371W7	AU371	RH	2009-11-21	30.0324	-31.267	17	607	2.41532	-110.227	2	1
371W7	AU371	RH	2009-11-21	30.0324	-31.267	17	608	2.42553	-96.5363	2	1
371W7	AU371	RH	2009-11-21	30.0287	-31.2685	17	619	4.31335	57.7207	2	1
371W7	AU371	RH	2009-11-21	30.0318	-31.2691	55	612	5.20299	-46.8989	2	1
371W7	AU371	RH	2009-11-21	30.0325	-31.2671	17	606	16.3966	-32.5208	2	1
371W7	AU371	RH	2009-11-21	30.0318	-31.2691	55	613	39.8678	44.8481	2	1
371W7	AU371	RH	2009-11-21	30.0329	-31.2674	17	605	50.9694	118.774	2	1
371W7	AU371	RH	2009-11-21	30.0317	-31.2694	55	614	102.203	84.8706	2	1
371W7	AU371	RH	2009-11-21	30.0307	-31.2691	17	615	108.238	24.6194	2	1
371W7	AU371	RH	2009-11-21	30.0332	-31.2665	17	604	111.393	-120.272	2	1
371W7	AU371	RH	2009-11-21	30.0324	-31.267	17	610	128.141	-126.081	2	1
371W7	AU371	RH	2009-11-21	30.0325	-31.2681	17	611	138.794	30.817	2	1
371W7	AU371	RH	2009-11-21	30.03	-31.2685	17	616	139.463	-47.0939	2	1
371W8	AU371	RH	2009-11-23	30.0263	-31.2698	17	714	0.523789	73.8278	2	1
371W8	AU371	RH	2009-11-23	30.0263	-31.2698	17	717	1.90335	-79.617	2	1
371W8	AU371	RH	2009-11-23	30.0169	-31.2662	17	701	2.24988	153.326	2	1
371W8	AU371	RH	2009-11-23	30.0263	-31.2698	17	715	4.62642	-164.523	2	1
371W8	AU371	RH	2009-11-23	30.0169	-31.2663	17	700	4.76445	-999	2	1
371W8	AU371	RH	2009-11-23	30.0262	-31.2698	17	716	5.26056	-179.766	2	1
371W8	AU371	RH	2009-11-23	30.027	-31.2727	17	708	19.6593	-109.272	2	1
371W8	AU371	RH	2009-11-23	30.0292	-31.2675	17	719	20.6873	63.2186	2	1
371W8	AU371	RH	2009-11-23	30.017	-31.2663	17	702	25.2664	-142.863	2	1
371W8	AU371	RH	2009-11-23	30.0271	-31.2728	17	709	37.7984	24.5123	2	1
371W8	AU371	RH	2009-11-23	30.0265	-31.2729	17	711	50.6289	40.6262	2	1
371W8	AU371	RH	2009-11-23	30.0268	-31.2702	17	713	75.9865	-64.105	2	1
371W8	AU371	RH	2009-11-23	30.0273	-31.273	17	710	90.49	135.191	2	1
371W8	AU371	RH	2009-11-23	30.0278	-31.272	17	707	123.621	151.942	2	1
371W8	AU371	RH	2009-11-23	30.0261	-31.2724	17	706	187.766	-52.2107	2	1
371W8	AU371	RH	2009-11-23	30.024	-31.2711	17	705	273.343	-0.310354	2	1
371W8	AU371	RH	2009-11-23	30.0261	-31.2726	17	712	298.851	55.8673	2	1
371W8	AU371	RH	2009-11-23	30.0262	-31.2698	17	718	410.977	87.5133	2	1
371W8	AU371	RH	2009-11-23	30.0208	-31.269	17	704	413.524	-4.66957	2	1
371W8	AU371	RH	2009-11-23	30.017	-31.266	17	703	528.351	131.384	2	1
371W9	AU371	RH	2009-11-25	30.0246	-31.2691	17	809	1.50182	66.3968	2	1
371W9	AU371	RH	2009-11-25	30.0226	-31.2711	17	815	1.86029	-110.896	2	1
371W9	AU371	RH	2009-11-25	30.0312	-31.269	17	802	2.20491	149.149	2	1
371W9	AU371	RH	2009-11-25	30.0226	-31.2711	17	814	2.31814	-78.546	2	1
371W9	AU371	RH	2009-11-25	30.0312	-31.269	17	803	2.52682	-89.8279	2	1
371W9	AU371	RH	2009-11-25	30.0246	-31.2691	17	810	2.70717	-136.755	2	1
371W9	AU371	RH	2009-11-25	30.0226	-31.2711	17	813	2.93351	47.7023	2	1
371W9	AU371	RH	2009-11-25	30.0225	-31.2711	17	812	4.08027	-170.415	2	1
371W9	AU371	RH	2009-11-26	30.0226	-31.2711	17	818	7.56542	-149.121	2	1
371W9	AU371	RH	2009-11-26	30.0224	-31.2711	17	817	23.192	-165.927	2	1
371W9	AU371	RH	2009-11-25	30.0226	-31.2711	17	816	23.8054	-25.4421	2	1
371W9	AU371	RH	2009-11-25	30.0314	-31.2688	17	801	40.5848	65.3279	2	1
371W9	AU371	RH	2009-11-25	30.0311	-31.269	17	804	50.1309	-106.065	2	1
371W9	AU371	RH	2009-11-25	30.0293	-31.2699	17	806	85.12	33.2075	2	1
371W9	AU371	RH	2009-11-25	30.0311	-31.2681	17	800	89.5959	-999	2	1
371W9	AU371	RH	2009-11-25	30.0312	-31.2694	17	805	199.556	78.0453	2	1
371W9	AU371	RH	2009-11-25	30.0285	-31.2697	17	807	207.362	-4.52022	2	1
371W9	AU371	RH	2009-11-25	30.0266	-31.2694	17	808	208.55	-4.02554	2	1
371W9	AU371	RH	2009-11-25	30.0246	-31.2692	17	811	313.073	14.8876	2	1
372W1	AU372	RH	2009-11-10	30.0349	-31.2508	55	24	1.1105	-20.7152	3	2
372W1	AU372	RH	2009-11-10	30.0384	-31.2542	55	38	1.20433	-105.623	3	2
372W1	AU372	RH	2009-11-10	30.0349	-31.2508	55	25	1.57038	-174.268	3	2
372W1	AU372	RH	2009-11-10	30.0384	-31.2542	55	39	1.64675	-85.8144	3	2
372W1	AU372	RH	2009-11-10	30.0246	-31.2684	17	21	2.28335	133.969	3	2
372W1	AU372	RH	2009-11-10	30.0348	-31.2508	55	23	3.76863	35.0125	3	2
372W1	AU372	RH	2009-11-10	30.0349	-31.2508	55	26	6.64806	76.4872	3	2
372W1	AU372	RH	2009-11-10	30.0385	-31.2542	55	37	6.97162	87.2228	3	2
372W1	AU372	RH	2009-11-10	30.0432	-31.2569	55	32	13.2037	170.816	3	2
372W1	AU372	RH	2009-11-10	30.0245	-31.2686	17	20	25.2434	-999	3	2
372W1	AU372	RH	2009-11-10	30.0431	-31.257	55	33	92.4629	148.955	3	2
372W1	AU372	RH	2009-11-10	30.0418	-31.2573	55	31	146.049	-40.3199	3	2
372W1	AU372	RH	2009-11-10	30.0405	-31.2547	55	35	166.189	33.8653	3	2
372W1	AU372	RH	2009-11-10	30.0398	-31.2534	55	36	167.553	-100.192	3	2
372W1	AU372	RH	2009-11-10	30.0348	-31.2507	55	27	168.688	-143.633	3	2
372W1	AU372	RH	2009-11-10	30.0354	-31.252	55	28	208.959	-18.5443	3	2
372W1	AU372	RH	2009-11-10	30.0367	-31.2534	55	29	367.062	5.36145	3	2
372W1	AU372	RH	2009-11-10	30.0386	-31.2559	55	30	367.408	-30.2016	3	2
372W1	AU372	RH	2009-11-10	30.0436	-31.2564	55	34	383.794	-93.657	3	2
372W1	AU372	RH	2009-11-10	30.0247	-31.2684	17	22	2368.89	-135.158	3	2
372W10	AU372	RH	2009-12-17	29.9744	-31.2458	22	1813	2.28958	21.9882	2	1
372W10	AU372	RH	2009-12-17	29.9744	-31.2458	22	1811	2.77427	167.384	2	1
372W10	AU372	RH	2009-12-17	29.9744	-31.2458	22	1812	3.30638	-173.463	2	1
372W10	AU372	RH	2009-12-17	29.9745	-31.2475	22	1815	3.63889	32.6822	2	1
372W10	AU372	RH	2009-12-17	29.9745	-31.2457	22	1802	4.82375	-176.05	2	1
372W10	AU372	RH	2009-12-17	29.974	-31.2469	22	1809	4.82805	-140.538	2	1
372W10	AU372	RH	2009-12-17	29.9745	-31.2457	22	1803	4.8437	-49.3054	2	1
372W10	AU372	RH	2009-12-17	29.9744	-31.2476	22	1817	5.60274	8.75659	2	1
372W10	AU372	RH	2009-12-17	29.9745	-31.2458	22	1800	7.93949	-999	2	1
372W10	AU372	RH	2009-12-17	29.9745	-31.2475	22	1816	9.2111	27.7638	2	1
372W10	AU372	RH	2009-12-17	29.9745	-31.2458	22	1801	9.65322	19.4809	2	1
372W10	AU372	RH	2009-12-17	29.9744	-31.2476	22	1818	40.8235	22.3954	2	1
372W10	AU372	RH	2009-12-17	29.9743	-31.2468	22	1808	42.1207	90.0328	2	1
372W10	AU372	RH	2009-12-17	29.9739	-31.2461	22	1807	92.2742	-14.56	2	1
372W10	AU372	RH	2009-12-17	29.974	-31.2469	22	1810	144.437	-83.1542	2	1
372W10	AU372	RH	2009-12-17	29.9735	-31.2449	22	1806	154.834	135.803	2	1
372W10	AU372	RH	2009-12-17	29.974	-31.2476	22	1819	162.703	-128.066	2	1
372W10	AU372	RH	2009-12-17	29.9745	-31.2458	22	1814	207.971	145.266	2	1
372W10	AU372	RH	2009-12-17	29.9745	-31.2458	22	1804	447.775	74.3483	2	1
372W10	AU372	RH	2009-12-17	29.9713	-31.2483	22	1805	470.644	161.577	2	1
372W11	AU372	RH	2009-12-21	30.0167	-31.2813	55	2009	1.80759	9.40509	1	2
372W11	AU372	RH	2009-12-21	30.0171	-31.2818	55	2006	3.75252	150.116	1	2
372W11	AU372	RH	2009-12-21	30.0179	-31.2808	55	2002	10.2326	41.6636	1	2
372W11	AU372	RH	2009-12-22	30.0107	-31.2757	3	2018	11.6669	-6.84441	1	2
372W11	AU372	RH	2009-12-21	30.0178	-31.2809	55	2001	12.375	140.235	1	2
372W11	AU372	RH	2009-12-21	30.0167	-31.2812	55	2008	17.424	-153.816	1	2
372W11	AU372	RH	2009-12-22	30.0107	-31.2758	3	2019	28.2293	3.88507	1	2
372W11	AU372	RH	2009-12-21	30.0181	-31.2807	55	2000	32.3144	-999	1	2
372W11	AU372	RH	2009-12-21	30.0174	-31.2816	55	2005	34.0168	80.6019	1	2
372W11	AU372	RH	2009-12-21	30.0172	-31.2813	55	2004	40.7462	-73.6378	1	2
372W11	AU372	RH	2009-12-21	30.0171	-31.2817	55	2007	78.2926	-58.4534	1	2
372W11	AU372	RH	2009-12-21	30.0179	-31.2807	55	2003	102.456	166.355	1	2
372W11	AU372	RH	2009-12-22	30.0128	-31.2759	3	2014	120.946	-44.2803	1	2
372W11	AU372	RH	2009-12-22	30.0112	-31.2748	3	2017	121.174	163.119	1	2
372W11	AU372	RH	2009-12-22	30.0103	-31.2757	3	2016	143.316	115.341	1	2
372W11	AU372	RH	2009-12-22	30.0156	-31.2786	3	2011	144.172	36.4128	1	2
372W11	AU372	RH	2009-12-22	30.0116	-31.276	3	2015	146.461	22.8539	1	2
372W11	AU372	RH	2009-12-22	30.016	-31.2774	3	2012	156.415	-87.2397	1	2
372W11	AU372	RH	2009-12-22	30.0146	-31.277	3	2013	224.693	16.6788	1	2
372W11	AU372	RH	2009-12-21	30.0167	-31.2813	55	2010	351.794	157.14	1	2
372W12	AU372	RH	2009-12-26	30.0074	-31.2811	3	2214	1.77531	102.756	1	2
372W12	AU372	RH	2009-12-26	30.007	-31.2814	3	2206	2.16543	-129.695	1	2
372W12	AU372	RH	2009-12-26	30.007	-31.2814	3	2207	2.16925	160.523	1	2
372W12	AU372	RH	2009-12-26	30.0074	-31.2811	3	2216	2.82916	176.18	1	2
372W12	AU372	RH	2009-12-26	30.0095	-31.28	3	2202	3.10865	-25.513	1	2
372W12	AU372	RH	2009-12-26	30.0073	-31.2811	3	2215	3.56146	-158.309	1	2
372W12	AU372	RH	2009-12-26	30.0073	-31.2811	3	2212	4.065	-137.641	1	2
372W12	AU372	RH	2009-12-26	30.007	-31.2815	3	2209	4.84207	-112.96	1	2
372W12	AU372	RH	2009-12-26	30.0073	-31.2811	3	2213	5.26938	172.632	1	2
372W12	AU372	RH	2009-12-26	30.0096	-31.2818	3	2218	11.9055	16.2304	1	2
372W12	AU372	RH	2009-12-26	30.007	-31.2814	3	2208	12.7524	-160.987	1	2
372W12	AU372	RH	2009-12-26	30.0072	-31.2812	3	2211	18.2854	57.5278	1	2
372W12	AU372	RH	2009-12-26	30.007	-31.2814	3	2204	26.3429	-107.622	1	2
372W12	AU372	RH	2009-12-26	30.0072	-31.2815	3	2205	29.0056	-179.707	1	2
372W12	AU372	RH	2009-12-26	30.007	-31.2814	3	2210	36.3044	-46.258	1	2
372W12	AU372	RH	2009-12-26	30.0097	-31.2818	3	2219	45.7115	176.59	1	2
372W12	AU372	RH	2009-12-26	30.0074	-31.2811	3	2217	246.841	-125.231	1	2
372W12	AU372	RH	2009-12-26	30.0095	-31.28	3	2203	300.166	-2.77018	1	2
372W12	AU372	RH	2009-12-26	30.0166	-31.2795	3	2201	737.993	26.5312	1	2
372W12	AU372	RH	2009-12-25	30.0231	-31.2761	55	2200	785.287	-999	1	2
372W13	AU372	RH	2009-12-30	30.0087	-31.2703	17	2406	0.86389	36.5759	1	1
372W13	AU372	RH	2009-12-30	30.0087	-31.2703	17	2404	2.72964	131.804	1	1
372W13	AU372	RH	2009-12-30	29.9999	-31.272	23	2412	3.99999	93.4974	1	1
372W13	AU372	RH	2009-12-30	30.0002	-31.2738	23	2419	4.92906	-3.70456	1	1
372W13	AU372	RH	2009-12-30	30.0087	-31.2703	17	2405	5.12002	-70.5527	1	1
372W13	AU372	RH	2009-12-30	30.0086	-31.2702	17	2403	8.00417	-43.5434	1	1
372W13	AU372	RH	2009-12-30	29.9992	-31.2738	23	2416	22.0408	59.3142	1	1
372W13	AU372	RH	2009-12-30	29.999	-31.2738	23	2415	25.7296	-131.191	1	1
372W13	AU372	RH	2009-12-30	29.9993	-31.274	23	2417	30.6322	-74.8371	1	1
372W13	AU372	RH	2009-12-30	30.0086	-31.2699	17	2402	43.7811	131.481	1	1
372W13	AU372	RH	2009-12-30	30.0086	-31.2703	17	2407	48.5885	126.185	1	1
372W13	AU372	RH	2009-12-30	29.9996	-31.2739	23	2418	61.9399	9.12353	1	1
372W13	AU372	RH	2009-12-30	29.9999	-31.272	23	2413	73.1754	159.62	1	1
372W13	AU372	RH	2009-12-30	30.0007	-31.2717	23	2411	97.0208	12.7013	1	1
372W13	AU372	RH	2009-12-30	30.0076	-31.2685	17	2409	120.842	-14.4482	1	1
372W13	AU372	RH	2009-12-30	30.0077	-31.2708	17	2401	144.863	-21.3062	1	1
372W13	AU372	RH	2009-12-30	30.0063	-31.2714	17	2400	156.88	-999	1	1
372W13	AU372	RH	2009-12-30	30.0086	-31.2699	17	2408	204.258	-22.549	1	1
372W13	AU372	RH	2009-12-30	30.0003	-31.2725	23	2414	214.133	83.0411	1	1
372W13	AU372	RH	2009-12-30	30.0068	-31.2677	17	2410	782.732	-82.4624	1	1
372W14	AU372	RH	2010-01-03	30.0023	-31.2831	3	2612	2.6546	29.1571	2	1
372W14	AU372	RH	2010-01-03	30.0023	-31.2831	3	2613	4.41507	118.587	2	1
372W14	AU372	RH	2010-01-03	30.0024	-31.2831	3	2611	4.47837	-158.994	2	1
372W14	AU372	RH	2010-01-03	30.0023	-31.283	3	2601	4.70394	-132.388	2	1
372W14	AU372	RH	2010-01-03	30.0022	-31.2827	3	2605	4.71985	-145.358	2	1
372W14	AU372	RH	2010-01-03	30.0023	-31.2831	3	2610	5.19512	48.6416	2	1
372W14	AU372	RH	2010-01-03	30.0024	-31.2829	3	2600	6.79008	-999	2	1
372W14	AU372	RH	2010-01-03	30.0023	-31.2825	3	2603	7.52958	-42.9161	2	1
372W14	AU372	RH	2010-01-03	30.0023	-31.2831	3	2609	8.38625	116.248	2	1
372W14	AU372	RH	2010-01-03	30.0022	-31.2825	3	2604	33.7347	-125.381	2	1
372W14	AU372	RH	2010-01-03	30.0029	-31.2842	3	2618	45.0613	82.6361	2	1
372W14	AU372	RH	2010-01-03	30.0025	-31.285	3	2615	59.0156	-93.0666	2	1
372W14	AU372	RH	2010-01-03	30.0024	-31.283	3	2602	59.1206	-124.312	2	1
372W14	AU372	RH	2010-01-03	30.0022	-31.2827	3	2606	64.6295	-146.927	2	1
372W14	AU372	RH	2010-01-03	30.003	-31.2849	3	2616	93.121	-35.0126	2	1
372W14	AU372	RH	2010-01-03	30.0037	-31.2844	3	2617	94.4389	-119.609	2	1
372W14	AU372	RH	2010-01-03	30.003	-31.2839	3	2608	114.148	-170.138	2	1
372W14	AU372	RH	2010-01-03	30.003	-31.2838	3	2619	122.753	-86.1241	2	1
372W14	AU372	RH	2010-01-03	30.0016	-31.2829	3	2607	178.861	-120.255	2	1
372W14	AU372	RH	2010-01-03	30.0024	-31.2831	3	2614	226.292	63.9155	2	1
372W15	AU372	RH	2010-01-07	29.9886	-31.28	23	2817	2.31254	-167.425	2	1
372W15	AU372	RH	2010-01-07	29.9886	-31.2801	23	2816	2.81392	-91.3889	2	1
372W15	AU372	RH	2010-01-07	29.9873	-31.2796	23	2814	8.51769	-22.5166	2	1
372W15	AU372	RH	2010-01-07	29.99	-31.2829	23	2807	12.9714	17.77	2	1
372W15	AU372	RH	2010-01-07	29.9899	-31.2829	23	2808	22.9577	142.874	2	1
372W15	AU372	RH	2010-01-07	29.9912	-31.2812	23	2800	27.1847	-999	2	1
372W15	AU372	RH	2010-01-07	29.9907	-31.2826	23	2805	43.377	64.4224	2	1
372W15	AU372	RH	2010-01-07	29.9903	-31.2826	23	2806	48.657	-39.9527	2	1
372W15	AU372	RH	2010-01-07	29.9873	-31.28	23	2813	54.4601	69.5104	2	1
372W15	AU372	RH	2010-01-07	29.9894	-31.2809	23	2811	100.497	-65.2585	2	1
372W15	AU372	RH	2010-01-07	29.99	-31.2828	23	2809	107.985	-63.281	2	1
372W15	AU372	RH	2010-01-07	29.9912	-31.2815	23	2804	135.888	57.5841	2	1
372W15	AU372	RH	2010-01-07	29.9893	-31.282	23	2810	136.292	36.724	2	1
372W15	AU372	RH	2010-01-07	29.9885	-31.2805	23	2812	140.295	1.58547	2	1
372W15	AU372	RH	2010-01-07	29.9873	-31.2795	23	2815	145.986	133.731	2	1
372W15	AU372	RH	2010-01-07	29.9896	-31.2796	23	2803	286.191	-118.349	2	1
372W15	AU372	RH	2010-01-07	29.9865	-31.2822	23	2819	297.837	-142.706	2	1
372W15	AU372	RH	2010-01-07	29.9912	-31.281	23	2801	328.322	35.5178	2	1
372W15	AU372	RH	2010-01-07	29.9886	-31.28	23	2818	334.932	-0.512564	2	1
372W15	AU372	RH	2010-01-07	29.9936	-31.2792	23	2802	411.979	-144.899	2	1
372W16	AU372	RH	2010-01-11	30.0011	-31.2718	23	3008	0.860973	-112.989	3	2
372W16	AU372	RH	2010-01-11	30.0011	-31.2718	23	3012	1.06099	-113.358	3	2
372W16	AU372	RH	2010-01-11	30.0011	-31.2718	23	3009	1.33832	-150.246	3	2
372W16	AU372	RH	2010-01-11	30.0011	-31.2718	23	3011	2.32277	152.265	3	2
372W16	AU372	RH	2010-01-11	30.0011	-31.2718	23	3007	3.10543	-104.556	3	2
372W16	AU372	RH	2010-01-11	30.0011	-31.2723	23	3002	4.39868	29.9613	3	2
372W16	AU372	RH	2010-01-11	30.0005	-31.2722	23	3015	4.81195	34.9935	3	2
372W16	AU372	RH	2010-01-11	30.0011	-31.2718	23	3010	6.7159	82.0057	3	2
372W16	AU372	RH	2010-01-11	30.0011	-31.2719	23	3006	10.1409	-170.554	3	2
372W16	AU372	RH	2010-01-11	30.001	-31.2718	23	3005	17.0445	50.0766	3	2
372W16	AU372	RH	2010-01-12	30.0086	-31.2678	17	3024	24.8035	-15.0722	3	2
372W16	AU372	RH	2010-01-12	30.0088	-31.2677	17	3023	27.9432	-160.283	3	2
372W16	AU372	RH	2010-01-11	29.9997	-31.2751	23	3000	77.3912	-999	3	2
372W16	AU372	RH	2010-01-11	30.0001	-31.2716	23	3014	82.526	-135.759	3	2
372W16	AU372	RH	2010-01-12	30.0071	-31.2723	17	3018	97.948	-172.329	3	2
372W16	AU372	RH	2010-01-11	30	-31.2719	23	3004	109.258	150.734	3	2
372W16	AU372	RH	2010-01-11	30.0011	-31.2718	23	3013	110.761	-156.127	3	2
372W16	AU372	RH	2010-01-12	30.0085	-31.268	17	3025	123.343	-72.9604	3	2
372W16	AU372	RH	2010-01-11	30.0011	-31.2723	23	3003	126.328	-119.495	3	2
372W16	AU372	RH	2010-01-12	30.0069	-31.2685	17	3021	193.75	-165.218	3	2
372W16	AU372	RH	2010-01-12	30.0065	-31.2717	17	3019	250.007	91.6571	3	2
372W16	AU372	RH	2010-01-12	30.0083	-31.2703	17	3020	266.4	-80.1643	3	2
372W16	AU372	RH	2010-01-11	30	-31.2745	23	3001	278.988	2.6531	3	2
372W16	AU372	RH	2010-01-12	30.0075	-31.27	17	3022	315.099	-136.486	3	2
372W16	AU372	RH	2010-01-12	30.0041	-31.2702	17	3017	399.582	72.6729	3	2
372W16	AU372	RH	2010-01-11	30.0005	-31.2722	23	3016	444.43	-123.388	3	2
372W17	AU372	RH	2010-01-16	29.9859	-31.2791	17	3210	1.19239	10.4404	3	2
372W17	AU372	RH	2010-01-16	29.9858	-31.2791	17	3212	1.34628	-106.442	3	2
372W17	AU372	RH	2010-01-16	29.9858	-31.2791	17	3211	1.50143	91.6402	3	2
372W17	AU372	RH	2010-01-15	29.9873	-31.2806	23	3207	2.79985	98.7081	3	2
372W17	AU372	RH	2010-01-15	29.9873	-31.2805	23	3206	3.13428	100.094	3	2
372W17	AU372	RH	2010-01-16	29.9858	-31.2791	17	3213	3.41162	-133.294	3	2
372W17	AU372	RH	2010-01-16	29.9858	-31.2791	17	3215	5.10864	150.717	3	2
372W17	AU372	RH	2010-01-16	29.9859	-31.2791	17	3214	5.79407	150.054	3	2
372W17	AU372	RH	2010-01-15	29.9872	-31.2806	23	3205	7.02367	40.7663	3	2
372W17	AU372	RH	2010-01-15	29.9891	-31.2811	23	3200	39.7146	-999	3	2
372W17	AU372	RH	2010-01-16	30.0055	-31.272	17	3218	51.4847	-53.9947	3	2
372W17	AU372	RH	2010-01-15	29.9869	-31.2809	23	3204	55.164	170.411	3	2
372W17	AU372	RH	2010-01-16	30.0057	-31.2716	17	3219	83.7013	-12.9054	3	2
372W17	AU372	RH	2010-01-15	29.991	-31.2796	23	3202	186.893	-103.125	3	2
372W17	AU372	RH	2010-01-15	29.9894	-31.2809	23	3201	222.092	-11.4476	3	2
372W17	AU372	RH	2010-01-15	29.9894	-31.2788	23	3203	367.8	-77.6478	3	2
372W17	AU372	RH	2010-01-16	29.9858	-31.2791	17	3216	601.458	9.16754	3	2
372W17	AU372	RH	2010-01-16	29.9906	-31.2761	17	3217	1622.94	17.7828	3	2
372W17	AU372	RH	2010-01-15	29.9873	-31.2806	23	3208	2033.9	140.63	3	2
372W17	AU372	RH	2010-01-16	30.0035	-31.271	3	3209	2066.54	-173.617	3	2
372W18	AU372	RH	2010-01-20	30.0196	-31.2748	17	3402	1.73772	60.7871	2	1
372W18	AU372	RH	2010-01-20	30.0196	-31.2747	17	3406	3.00658	76.2594	2	1
372W18	AU372	RH	2010-01-20	30.0196	-31.2747	17	3405	3.89961	105.418	2	1
372W18	AU372	RH	2010-01-20	30.0138	-31.2716	17	3414	4.14072	-135.578	2	1
372W18	AU372	RH	2010-01-20	30.0195	-31.2747	17	3404	5.5101	125.485	2	1
372W18	AU372	RH	2010-01-20	30.0196	-31.2748	17	3403	8.22481	-98.1188	2	1
372W18	AU372	RH	2010-01-20	30.0139	-31.2714	17	3413	25.5162	23.297	2	1
372W18	AU372	RH	2010-01-20	30.0138	-31.2716	17	3415	41.6039	-164.143	2	1
372W18	AU372	RH	2010-01-20	30.0133	-31.271	17	3418	62.479	123.622	2	1
372W18	AU372	RH	2010-01-20	30.0142	-31.2707	17	3412	84.3357	-131.594	2	1
372W18	AU372	RH	2010-01-20	30.0146	-31.2714	17	3411	90.3631	20.9487	2	1
372W18	AU372	RH	2010-01-20	30.02	-31.2756	17	3408	97.8627	-86.4103	2	1
372W18	AU372	RH	2010-01-20	30.0142	-31.2707	17	3417	101.706	-151.446	2	1
372W18	AU372	RH	2010-01-20	30.0196	-31.2747	17	3407	117.326	-107.12	2	1
372W18	AU372	RH	2010-01-20	30.0134	-31.2715	17	3416	124.612	118.786	2	1
372W18	AU372	RH	2010-01-19	30.0196	-31.2749	17	3400	213.102	-999	2	1
372W18	AU372	RH	2010-01-20	30.0198	-31.2767	3	3401	227.827	-179.61	2	1
372W18	AU372	RH	2010-01-20	30.0209	-31.2754	17	3409	333.95	-129.266	2	1
372W18	AU372	RH	2010-01-20	30.0182	-31.2739	17	3410	471.926	6.97761	2	1
372W19	AU372	RH	2010-01-24	30.0386	-31.2623	55	3605	1.42769	52.1126	3	2
372W19	AU372	RH	2010-01-24	30.0387	-31.2623	55	3604	2.48382	135.066	3	2
372W19	AU372	RH	2010-01-24	30.0387	-31.2622	55	3603	2.50996	-72.2691	3	2
372W19	AU372	RH	2010-01-24	30.0382	-31.2611	55	3612	9.8954	150.466	3	2
372W19	AU372	RH	2010-01-24	30.0388	-31.2611	55	3610	14.7815	-68.29	3	2
372W19	AU372	RH	2010-01-24	30.0386	-31.2611	55	3611	46.6274	-39.9037	3	2
372W19	AU372	RH	2010-01-24	30.0413	-31.2551	55	3618	50.5441	-64.9789	3	2
372W19	AU372	RH	2010-01-24	30.0391	-31.2625	55	3608	57.2399	-86.0114	3	2
372W19	AU372	RH	2010-01-24	30.0383	-31.2611	55	3613	58.9647	-151.87	3	2
372W19	AU372	RH	2010-01-24	30.0409	-31.2558	55	3617	90.4686	5.13907	3	2
372W19	AU372	RH	2010-01-24	30.041	-31.2548	55	3619	114.803	30.5486	3	2
372W19	AU372	RH	2010-01-24	30.0387	-31.2622	55	3609	127.837	52.8624	3	2
372W19	AU372	RH	2010-01-24	30.0377	-31.2612	55	3614	129.347	151.875	3	2
372W19	AU372	RH	2010-01-24	30.0382	-31.2635	55	3607	161.813	-160.663	3	2
372W19	AU372	RH	2010-01-24	30.0386	-31.2622	55	3606	164.922	-121.675	3	2
372W19	AU372	RH	2010-01-24	30.0433	-31.25	11	3601	203.826	-110.314	3	2
372W19	AU372	RH	2010-01-24	30.0437	-31.2483	11	3600	215.304	-999	3	2
372W19	AU372	RH	2010-01-24	30.04	-31.2578	55	3616	259.273	-1.43731	3	2
372W19	AU372	RH	2010-01-24	30.0386	-31.2605	55	3615	350.275	-22.8494	3	2
372W19	AU372	RH	2010-01-24	30.0452	-31.2498	11	3602	1645.03	122.881	3	2
372W2	AU372	RH	2009-11-14	30.0266	-31.2664	17	202	1.02255	43.8069	2	1
372W2	AU372	RH	2009-11-14	30.0254	-31.2666	17	210	1.02255	-7.69302	2	1
372W2	AU372	RH	2009-11-14	30.0266	-31.2665	17	204	2.22066	-110.578	2	1
372W2	AU372	RH	2009-11-14	30.0255	-31.2666	17	208	3.18225	-112.288	2	1
372W2	AU372	RH	2009-11-14	30.0254	-31.2666	17	212	3.72862	-161.942	2	1
372W2	AU372	RH	2009-11-14	30.0254	-31.2666	17	211	3.895	-165.72	2	1
372W2	AU372	RH	2009-11-14	30.0266	-31.2664	17	203	4.94091	-154.797	2	1
372W2	AU372	RH	2009-11-14	30.0254	-31.2668	17	206	7.74736	76.2168	2	1
372W2	AU372	RH	2009-11-14	30.0255	-31.2665	17	209	9.62992	-52.9211	2	1
372W2	AU372	RH	2009-11-14	30.0326	-31.2662	17	217	25.6516	-3.15003	2	1
372W2	AU372	RH	2009-11-14	30.0269	-31.2664	17	201	26.7047	-90.0843	2	1
372W2	AU372	RH	2009-11-14	30.0324	-31.2663	17	218	28.1576	27.38	2	1
372W2	AU372	RH	2009-11-14	30.0253	-31.2667	17	207	29.0357	76.4417	2	1
372W2	AU372	RH	2009-11-14	30.0266	-31.2665	17	205	137.918	-146.459	2	1
372W2	AU372	RH	2009-11-14	30.0322	-31.2664	17	219	152.164	-49.7677	2	1
372W2	AU372	RH	2009-11-14	30.0271	-31.2681	17	200	207.125	-999	2	1
372W2	AU372	RH	2009-11-14	30.0345	-31.2649	17	216	246.183	163.811	2	1
372W2	AU372	RH	2009-11-14	30.0254	-31.2666	17	213	266.606	152.103	2	1
372W2	AU372	RH	2009-11-14	30.0319	-31.2658	17	215	292.282	-29.8626	2	1
372W2	AU372	RH	2009-11-14	30.0276	-31.2654	17	214	442.524	38.3141	2	1
372W20	AU372	RH	2010-01-28	30.0299	-31.2696	17	3802	1.94994	-144.917	3	2
372W20	AU372	RH	2010-01-28	30.0299	-31.2696	17	3801	2.51882	101.015	3	2
372W20	AU372	RH	2010-01-28	30.0374	-31.2639	55	3807	2.60107	132.817	3	2
372W20	AU372	RH	2010-01-28	30.0374	-31.2639	55	3809	3.34261	171.721	3	2
372W20	AU372	RH	2010-01-28	30.0299	-31.2696	17	3800	3.80759	-999	3	2
372W20	AU372	RH	2010-01-28	30.0374	-31.2639	55	3808	4.13471	-118.483	3	2
372W20	AU372	RH	2010-01-28	30.0373	-31.2639	55	3806	4.37427	106.986	3	2
372W20	AU372	RH	2010-01-28	30.0374	-31.2639	55	3805	6.76091	-78.302	3	2
372W20	AU372	RH	2010-01-28	30.0285	-31.2727	55	3817	12.6568	-97.5608	3	2
372W20	AU372	RH	2010-01-28	30.0389	-31.2631	55	3812	33.3114	11.3051	3	2
372W20	AU372	RH	2010-01-28	30.0374	-31.2639	55	3810	99.5007	-153.249	3	2
372W20	AU372	RH	2010-01-28	30.0362	-31.2647	55	3814	131.024	30.5454	3	2
372W20	AU372	RH	2010-01-28	30.0383	-31.2642	55	3811	138.131	-80.7302	3	2
372W20	AU372	RH	2010-01-28	30.029	-31.2716	55	3816	138.514	-18.1815	3	2
372W20	AU372	RH	2010-01-28	30.0299	-31.2696	17	3803	183.641	65.0343	3	2
372W20	AU372	RH	2010-01-28	30.0286	-31.2727	55	3818	272.048	-70.659	3	2
372W20	AU372	RH	2010-01-28	30.0391	-31.2629	55	3813	372.466	-164.968	3	2
372W20	AU372	RH	2010-01-28	30.03	-31.2707	55	3819	439.995	24.3059	3	2
372W20	AU372	RH	2010-01-28	30.0314	-31.2687	17	3804	842.717	-8.90103	3	2
372W20	AU372	RH	2010-01-28	30.0349	-31.2648	55	3815	1018.76	-47.3684	3	2
372W21	AU372	RH	2010-02-01	30.0295	-31.2726	55	4002	0.848559	100.793	1	1
372W21	AU372	RH	2010-02-01	30.0295	-31.2726	55	4005	1.67422	74.1774	1	1
372W21	AU372	RH	2010-02-01	30.0295	-31.2726	55	4003	2.46125	160.884	1	1
372W21	AU372	RH	2010-02-02	30.0335	-31.2657	17	4022	2.48363	74.5256	1	1
372W21	AU372	RH	2010-02-01	30.033	-31.2688	55	4013	2.74419	132.661	1	1
372W21	AU372	RH	2010-02-01	30.029	-31.2727	55	4000	2.81518	-999	1	1
372W21	AU372	RH	2010-02-01	30.0331	-31.2688	55	4014	3.70869	-106.413	1	1
372W21	AU372	RH	2010-02-01	30.0331	-31.2688	55	4011	3.72869	-152.269	1	1
372W21	AU372	RH	2010-02-01	30.033	-31.2688	55	4012	3.85173	92.1637	1	1
372W21	AU372	RH	2010-02-01	30.0295	-31.2726	55	4004	8.32219	-2.2616	1	1
372W21	AU372	RH	2010-02-02	30.0335	-31.2663	17	4025	9.63998	-59.4691	1	1
372W21	AU372	RH	2010-02-01	30.0331	-31.2688	55	4015	11.857	-121.121	1	1
372W21	AU372	RH	2010-02-02	30.0279	-31.2723	17	4017	22.1954	-63.6863	1	1
372W21	AU372	RH	2010-02-02	30.0335	-31.2657	17	4023	22.3407	-125.875	1	1
372W21	AU372	RH	2010-02-01	30.029	-31.2727	55	4001	56.3468	96.7808	1	1
372W21	AU372	RH	2010-02-01	30.0295	-31.2726	55	4006	59.1195	-159.404	1	1
372W21	AU372	RH	2010-02-02	30.0334	-31.2662	17	4021	65.3705	-34.6618	1	1
372W21	AU372	RH	2010-02-01	30.0325	-31.2691	55	4010	67.8354	20.3922	1	1
372W21	AU372	RH	2010-02-02	30.0334	-31.2655	17	4024	92.536	-149.115	1	1
372W21	AU372	RH	2010-02-01	30.029	-31.2726	55	4007	158.476	164.109	1	1
372W21	AU372	RH	2010-02-01	30.0303	-31.2721	55	4008	203.24	-38.9544	1	1
372W21	AU372	RH	2010-02-01	30.0312	-31.2705	55	4009	222.243	12.6292	1	1
372W21	AU372	RH	2010-02-02	30.0317	-31.2675	17	4020	238.729	24.3899	1	1
372W21	AU372	RH	2010-02-02	30.0304	-31.2701	17	4019	336.379	-19.0069	1	1
372W21	AU372	RH	2010-02-02	30.0279	-31.2725	17	4018	386.329	-125.382	1	1
372W21	AU372	RH	2010-02-01	30.033	-31.2688	55	4016	678.242	-32.5469	1	1
372W22	AU372	RH	2010-02-06	30.0191	-31.2442	17	4211	0.706264	-78.0702	3	2
372W22	AU372	RH	2010-02-05	29.9882	-31.2236	20	4202	0.808719	179.096	3	2
372W22	AU372	RH	2010-02-06	30.0249	-31.2685	17	4219	1.28624	87.3202	3	2
372W22	AU372	RH	2010-02-06	30.0247	-31.2685	17	4215	1.8773	-72.5388	3	2
372W22	AU372	RH	2010-02-05	29.9882	-31.2236	20	4201	1.94894	-64.4533	3	2
372W22	AU372	RH	2010-02-06	30.0249	-31.2685	17	4218	2.23574	125.387	3	2
372W22	AU372	RH	2010-02-06	30.0191	-31.2442	17	4210	2.80812	68.9147	3	2
372W22	AU372	RH	2010-02-05	29.9881	-31.2236	20	4200	3.45176	-999	3	2
372W22	AU372	RH	2010-02-06	30.0247	-31.2685	17	4214	4.65248	-171.645	3	2
372W22	AU372	RH	2010-02-06	30.0249	-31.2685	17	4217	7.15677	20.0149	3	2
372W22	AU372	RH	2010-02-06	30.019	-31.2441	17	4209	8.08009	15.6514	3	2
372W22	AU372	RH	2010-02-05	29.9885	-31.2248	20	4207	13.9582	-157.325	3	2
372W22	AU372	RH	2010-02-06	30.0247	-31.2685	17	4216	18.9055	49.184	3	2
372W22	AU372	RH	2010-02-05	29.9876	-31.2235	20	4204	33.1996	-9.48364	3	2
372W22	AU372	RH	2010-02-05	29.9882	-31.2236	20	4203	63.4726	40.7678	3	2
372W22	AU372	RH	2010-02-05	29.9873	-31.2234	20	4205	93.0268	-155.262	3	2
372W22	AU372	RH	2010-02-05	29.988	-31.2238	20	4206	126.366	39.0822	3	2
372W22	AU372	RH	2010-02-06	30.0301	-31.2677	17	4213	566.873	101.989	3	2
372W22	AU372	RH	2010-02-06	30.0191	-31.2442	17	4212	3053.65	25.2315	3	2
372W22	AU372	RH	2010-02-05	29.9885	-31.2247	20	4208	3928.94	125.212	3	2
372W23	AU372	RH	2010-02-10	30.025	-31.259	17	4403	0.938042	-54.1068	2	1
372W23	AU372	RH	2010-02-10	30.0214	-31.2583	17	4412	1.88193	-172.556	2	1
372W23	AU372	RH	2010-02-10	30.0213	-31.2583	17	4416	1.89116	-148.098	2	1
372W23	AU372	RH	2010-02-10	30.0214	-31.2583	17	4413	2.00357	111.546	2	1
372W23	AU372	RH	2010-02-10	30.0214	-31.2583	17	4415	2.2772	-133.183	2	1
372W23	AU372	RH	2010-02-10	30.0213	-31.2584	17	4414	2.43417	164.924	2	1
372W23	AU372	RH	2010-02-10	30.025	-31.259	17	4401	2.92326	-168.357	2	1
372W23	AU372	RH	2010-02-10	30.025	-31.2591	17	4402	6.71014	126.368	2	1
372W23	AU372	RH	2010-02-10	30.025	-31.2591	17	4400	7.54695	-999	2	1
372W23	AU372	RH	2010-02-10	30.0266	-31.2571	17	4406	10.045	14.6081	2	1
372W23	AU372	RH	2010-02-10	30.0214	-31.2584	17	4417	13.3819	-97.818	2	1
372W23	AU372	RH	2010-02-10	30.0218	-31.2582	17	4419	24.2469	-53.498	2	1
372W23	AU372	RH	2010-02-10	30.025	-31.259	17	4404	30.6648	162.461	2	1
372W23	AU372	RH	2010-02-10	30.0267	-31.2571	17	4407	32.0261	14.0699	2	1
372W23	AU372	RH	2010-02-10	30.0214	-31.2583	17	4418	35.1647	60.9264	2	1
372W23	AU372	RH	2010-02-10	30.0217	-31.2585	17	4411	36.9294	65.7957	2	1
372W23	AU372	RH	2010-02-10	30.025	-31.2572	17	4409	171.221	-7.07501	2	1
372W23	AU372	RH	2010-02-10	30.027	-31.2569	17	4408	208.664	-158.799	2	1
372W23	AU372	RH	2010-02-10	30.0234	-31.2575	17	4410	213.205	-18.6373	2	1
372W23	AU372	RH	2010-02-10	30.0253	-31.259	17	4405	263.437	-47.4974	2	1
372W24	AU372	RH	2010-02-14	30.0295	-31.268	17	4612	0.630373	80.1718	2	1
372W24	AU372	RH	2010-02-14	30.0273	-31.2726	17	4601	0.634442	131.81	2	1
372W24	AU372	RH	2010-02-14	30.0295	-31.268	17	4614	0.785693	-73.4993	2	1
372W24	AU372	RH	2010-02-14	30.0295	-31.268	17	4613	0.940957	175.189	2	1
372W24	AU372	RH	2010-02-14	30.0295	-31.268	17	4618	1.44701	144.571	2	1
372W24	AU372	RH	2010-02-14	30.0295	-31.268	17	4615	1.45992	168.746	2	1
372W24	AU372	RH	2010-02-14	30.0295	-31.268	17	4611	1.4616	99.005	2	1
372W24	AU372	RH	2010-02-14	30.0273	-31.2727	17	4600	1.57774	-999	2	1
372W24	AU372	RH	2010-02-14	30.0295	-31.268	17	4616	1.73793	-89.1355	2	1
372W24	AU372	RH	2010-02-14	30.0273	-31.2726	17	4602	2.1525	-19.1354	2	1
372W24	AU372	RH	2010-02-14	30.0273	-31.2727	17	4603	2.24998	96.4627	2	1
372W24	AU372	RH	2010-02-14	30.0295	-31.268	17	4617	2.28317	-110.939	2	1
372W24	AU372	RH	2010-02-14	30.0295	-31.268	17	4619	3.21518	140.492	2	1
372W24	AU372	RH	2010-02-14	30.0273	-31.2727	17	4604	4.02542	-0.471996	2	1
372W24	AU372	RH	2010-02-14	30.0294	-31.268	17	4610	6.86591	137.84	2	1
372W24	AU372	RH	2010-02-14	30.0295	-31.268	17	4609	11.1693	-16.7523	2	1
372W24	AU372	RH	2010-02-14	30.0305	-31.2689	17	4607	65.1866	63.706	2	1
372W24	AU372	RH	2010-02-14	30.0305	-31.2702	17	4606	153.53	-47.1899	2	1
372W24	AU372	RH	2010-02-14	30.0311	-31.2686	17	4608	171.813	-129.021	2	1
372W24	AU372	RH	2010-02-14	30.0273	-31.2727	17	4605	451.95	-168.887	2	1
372W25	AU372	RH	2010-02-18	30.0302	-31.2685	17	4800	0.930216	-999	3	1
372W25	AU372	RH	2010-02-18	30.0292	-31.2673	17	4809	3.28442	175.427	3	1
372W25	AU372	RH	2010-02-18	30.0298	-31.2685	17	4806	4.50939	17.3844	3	1
372W25	AU372	RH	2010-02-18	30.0302	-31.2685	17	4801	5.06128	146.854	3	1
372W25	AU372	RH	2010-02-18	30.0297	-31.2685	17	4805	5.27967	168.087	3	1
372W25	AU372	RH	2010-02-18	30.0302	-31.2685	17	4802	7.35446	-163.981	3	1
372W25	AU372	RH	2010-02-18	30.0291	-31.2673	17	4808	8.54762	102.129	3	1
372W25	AU372	RH	2010-02-18	30.0312	-31.2705	55	4818	17.0617	-63.2516	3	1
372W25	AU372	RH	2010-02-18	30.0311	-31.2706	55	4817	19.2873	163.252	3	1
372W25	AU372	RH	2010-02-18	30.0299	-31.2683	17	4804	23.1075	-85.1794	3	1
[truncated: 4,759 more rows]

## Sheet: Zebra
Walk	Unit_ID	Species	PointDATE	Longitude	Latitude	ID_F	ID_NR	STEPLENGTH	TURNANGLE	Success	View
[truncated: 5,574 more rows]

[truncated: 9 more sheets: ELNotVis, ELVisSame, ELVisChange, RHNotVis, RHVisSame, RHVisChange, ZENotVis, ZEVisSame, ZEVisChange]
